# Supplementary material
Source: publisher figshare collection journal article supplement (https://acs.figshare.com/ndownloader/files/3699703)
Supplement: Supplementary file 1 [file 3699703]

## Sheet: S1a
Table S1: Proteins identified in the Bacillus subtilis spore inner membrane fraction
a. Bacillus subtilis proteins overview
			Replicate 1		Replicate 2		Replicate 3
UniprotKB	Gene name	Protein mass	Score	# MSMS spectra	Score	# MSMS spectra	Score	# MSMS spectra
C0H3S6	ywzG	13118	20	1
C0H3X3	yezF	8554	591	13	395	7	206	3
C0H3X7	mprF	96317	247	13	73	4	87	6
C0H445	ypzH	7203	51	1			177	3
C0H461	yrzQ	5039	398	13	97	2	1057	30
C0SP78	ydfM	32891	95	3
C0SP90	ythA	49238	1467	46	800	24	581	21
C0SP93	accD	32242	116	5	243	14	159	12
C0SP94	yhfQ	35524	255	12	29	1	27	1
C0SP95	ycnJ	59757	80	5	32	2
C0SP98	ykfD	37546	423	18	79	6	107	7
C0SPA7	yukB	171971					19	3
C0SPB0	ytcI	59573	224	13	1336	61	1573	70
C0SPB1	yukJ	25709			131	7	122	6
C0SPB4	yhaQ	33951	105	4	34	4	26	1
C0SPB9	ykoN	43778	90	4	29	1	42	2
O05227	mrpG	13731	34	2
O05229	mrpD	53442	22	1
O05235	yugF	31420	114	10	201	8	93	3
O05239	yugJ	42877	347	13	1861	68	3010	115
O05240	yugK	43550	100	2	599	18	566	20
O05241	yugS	48985	1515	75	268	24	461	23
O05248	yugP	24679	814	25	247	10	284	9
O05250	malK	59064	301	12	110	5	28	3
O05251	malR	26948			196	6	126	4
O05252	yufN	38395	297	8	52	3	48	2
O05253	yufO	56322	223	11	100	8	104	8
O05254	yufP	36877	92	2
O05255	yufQ	33716	66	2	32	1
O05260	mrpC	12277	36	1
O05265	yulF	36720			25	1	88	5
O05267	yumB	45133	4307	130	4134	141	4735	151
O05268	yumC	36932			185	10
O05405	yrhO	31769			57	3
O05496	ydhE	44745			32	1
O05503	ydhK	22579	76	5
O05509	gmuR	27471			19	1
O05514	thiL	36146			40	3
O05515	tsaE	18009					29	1
O05516	tsaB	25284	32	1	83	2	50	1
O05518	tsaD	36933	49	2	35	2	61	3
O05519	ydiF	73550			67	2	37	3
O05521	rex	24077	141	6	143	8	127	6
O05525	ydiL	27629	43	1			27	1
O06010	yraD	11277			36	1
O06012	adhB	41695	413	17	661	23	432	17
O06476	yfmR	71077			110	6	49	4
O06478	yfmT	53402	42	1
O06491	gatA	52802	672	23	910	40	1007	48
O06493	opuE	53248	43	1
O06724	yisK	33296			32	2
O06725	yisL	13213	125	5	66	2
O06734	yisY	30540			31	1	26	1
O06741	yitF	42424	41	2	72	4	30	2
O06744	yitI	17047					77	3
O06746	yitK	18191			42	2	61	1
O06747	yitL	34203			107	5	129	5
O06965	yvcA	28082	249	11	54	1	48	2
O06967	bmrA	64535	56	5	77	2
O06972	yvcI	18259			24	1
O06973	yvcJ	33944	97	4	292	17	243	13
O06974	mgfK	34779	55	4	50	2	38	3
O06975	whiA	36659	51	3	64	3	38	1
O06976	crh	9321			27	1	37	1
O06977	yvcN	28922			20	1	42	2
O06979	yvcQ	40212	152	7	48	2	34	2
O06986	yvdD	21154	85	2	30	2
O06988	bbmA	69021	106	4	354	14	357	14
O06989	mdxE	45629	51	2
O06990	mdxF	48668	70	2	73	3	58	1
O06991	mdxG	30979	62	4	25	1
O06993	mdxK	88509			56	3	41	2
O06994	malL	66153	26	1	162	12	150	10
O06998	yvdQ	18682			39	7
O07001	yvdT	22271	80	1	214	6	39	1
O07002	yveA	57180	547	31	277	21	252	21
O07006	padC	19121					32	1
O07012	ganA	77736					29	1
O07020	lutA	27002	50	2	73	2	63	1
O07084	czcD	34255					23	1
O07086	yrdR	36003	33	2
O07513	hit	16459			43	2	41	3
O07516	yhaH	13058	377	16	138	5	224	9
O07523	yhaP	45446	122	5	25	1	41	1
O07530	yhdB	9787			55	1	42	2
O07531	yhdC	12395			64	1	29	1
O07543	yheB	42881	695	38	186	11	230	14
O07548	yheG	22907			23	1
O07576	yhdG	49906	175	6	151	5	150	3
O07581	yhdL	40612	512	21	164	7	163	6
O07584	plsC	22023	195	8	134	7	152	5
O07585	yhdP	49995	227	9	79	2	42	1
O07587	yhdR	44032			27	2	31	2
O07592	yhdW	27459	50	1
O07595	cobB	27685	51	3	70	4	38	5
O07596	yheN	31767	22	1
O07603	yhfE	38883	33	1	123	5
O07607	yhfI	26736			92	5
O07608	lplJ	38111	186	7	611	25	605	24
O07609	yhfK	22803			272	7	279	14
O07611	yhfM	14998	1453	44	376	12	530	18
O07615	yhfP	34792	76	3	128	6	68	3
O07617	phoE	22151			34	2	70	4
O07618	yhfS	38717					27	1
O07622	yhfW	57587	139	7	623	37	163	13
O07631	typA	68574	331	9	865	33	837	34
O07634	ylaJ	23427	1827	87	573	33	921	46
O07637	glsA2	34389	333	9	157	5	68	3
O07919	yraG	9257			24	1
O07949	yraF	13997			53	1
O08394	cypD	119850	1408	61	1496	73	996	53
O08455	yhaN	111204					24	3
O30509	gatB	53691	601	21	1362	53	1237	48
O31418	mrnC	16219			41	1	29	1
O31427	skfE	27105			40	2	41	2
O31428	skfF	52125	74	3	67	1	46	1
O31430	skfH	16447					39	1
O31431	ybdG	37042	56	2
O31433	ybdK	37363	21	1			20	2
O31440	cypC	48363	163	6	149	7	74	5
O31441	ybyB	9856	34	1
O31446	ybfF	35458	142	3	74	1	57	1
O31451	ybfJ	14557	57	1
O31473	ycgI	22602					24	1
O31489	ydcI	81531			484	25	285	21
O31498	ligA	75115	104	10	1143	39	627	30
O31501	swrC	113435	2125	78	1187	49	810	45
O31502	dagK	33373	30	1	35	1
O31503	rlmCD	52357	36	2	130	10	82	4
O31529	yesZ	74736			25	1	29	1
O31533	yetF	26350	1353	56	557	25	479	17
O31539	yetJ	23813			45	2
O31543	yfjQ	37878	228	10
O31545	yfjO	52499	151	9	162	12	146	12
O31546	dus2	37195					19	1
O31555	yfjD	21785	96	4
O31570	yfhB	32223					71	2
O31574	yfhF	33920			60	4
O31580	yfhL	12052	71	5	79	8	40	3
O31581	yfhM	32852	314	14	202	9	152	8
O31582	yfhO	98424	128	4	21	1
O31583	yfhP	37104	34	2
O31588	yhzB	23442					56	1
O31590	cspR	18679					59	1
O31593	yhbJ	23608	3083	87	1268	34	2014	57
O31601	yjbC	23106			185	14	262	13
O31605	yjbG	77139	58	3	1750	101	1946	110
O31612	ppnK1	30222	26	1	20	1	45	2
O31614	prpE	27617	35	1	72	6	55	2
O31615	yjbQ	67482	602	25	270	14	131	7
O31623	yjcA	13255					23	1
O31629	yjcG	19706			476	18	241	18
O31633	yjcK	20912			18	1	29	1
O31634	yjcL	43293	87	2
O31635	yjcM	46660			35	1	46	2
O31636	yjcN	12053	294	10	51	1	54	1
O31638	yjcP	20131	38	1
O31642	yjdA	27603			65	3	50	2
O31649	yjdH	15249			100	2
O31650	yjdI	17362			22	1
O31655	rsgI	43620	44	2
O31656	ykrK	26962	124	4	50	2	36	1
O31657	htpX	32845	277	7			87	4
O31661	kinE	85801					33	4
O31664	mtnU	29666					27	2
O31666	mtnW	44186			28	1
O31671	kinD	57011	148	5	26	2
O31672	mhqR	16614			43	2
O31673	clpE	78143	360	15
O31675	queC	24969	64	1	45	2
O31683	ykvR	11056			29	1
O31689	ykvY	40423	85	3	90	2	66	3
O31709	yknW	24217	31	1
O31710	yknX	41682	55	2
O31712	yknZ	42155	73	3	45	1
O31714	fruK	32828			31	1	44	2
O31716	ykpA	61188	305	11	457	20	427	22
O31717	ykpB	33665	108	5	73	3	32	2
O31724	ylmB	47523			37	2
O31727	ylmE	25973	20	1			81	2
O31729	ylmG	10358	181	7	82	2	84	2
O31737	ylqB	17789					25	1
O31740	rimM	20248			101	5	41	1
O31741	trmD	27805					29	2
O31742	rplS	13379	451	23	823	43	922	52
O31743	rbgA	32023	169	9	375	15	256	16
O31749	pyrH	26124	188	5	579	15	471	15
O31751	uppS	29758	47	1	75	3	29	2
O31752	cdsA	30306	35	2
O31753	dxr	42738	223	10	175	6	70	4
O31754	rasP	46771	548	22	102	5	85	5
O31755	proS	63436	270	10	1063	40	454	24
O31760	rnjB	61251	1832	69	586	27	744	42
O31761	ymfC	27994	53	1			35	2
O31762	ymfD	44045	2080	36	941	18	1232	23
O31764	ymfF	48231	147	6	978	34	959	42
O31766	ymfH	49089	194	6	1021	35	1579	54
O31768	ymfJ	9642					264	9
O31771	ymfM	32416	656	31	140	8	308	17
O31773	pbpX	43887	165	6
O31774	rny	58940	1344	65	1146	47	559	28
O31776	tdh	37543	25	1	28	1
O31777	kbl	43313	197	11	228	11	216	11
O31778	miaB	58532	25	1	189	6	85	5
O31782	pksN	612061					37	8
O31793	ymaG	10100			63	3
O31795	miaA	35667	29	1	31	2	29	2
O31796	hfq	8509	42	1	182	5	132	3
O31797	ymzC	10559	47	1
O31806	yndB	16167					23	1
O31810	yndF	45024	58	2
O31816	yndM	20496	302	18	49	4	63	4
O31823	yngC	21912	53	2	20	2
O31824	nrnB	46588	94	3	355	12	141	8
O31829	yoaF	11097	70	3	29	1
O31845	yozB	20598	30	1
O31850	yojN	33573					38	1
O31853	yojK	45861					51	4
O31854	yojJ	23027	50	3	89	8	43	3
O31856	rsbRC	32146			27	1
O31857	yojG	25789			67	3	46	3
O31875	nrdEB	124998			84	4	139	6
O31894	yorT	4750					19	1
O31916	yoqW	26104	29	1
O31929	yopI	20596	112	3
O31974	yomK	16889	66	2
O31989	yolF	12304	649	21	165	6	309	15
O31990	uvrX	47084			30	2
O31997	yokJ	19180			42	2
O32003	yokD	31009					40	1
O32028	mtnN	25363			161	6	70	2
O32031	yrrS	25318	275	10	75	4	133	7
O32037	tcdA	28237			70	5	115	6
O32038	aspS	66105	857	27	765	32	1104	48
O32039	hisS	48386	190	16	1193	53	1195	66
O32045	yrvD	12227	212	4	102	2	68	1
O32047	secDF	81603	2229	83	1124	45	889	46
O32050	yrbG	25271	724	25	284	13	320	12
O32052	yrbF	9897	391	17	169	7	182	9
O32053	tgt	44139			34	2	28	2
O32054	queA	38602	28	1	202	8	278	12
O32055	ruvB	37502	37	1
O32062	safA	43429			71	1
O32064	ytzA	14259	30	1			26	1
O32065	ytzB	11716	85	2	59	1	56	1
O32071	ytdP	89774			34	5
O32075	yuaI	19830					109	1
O32076	yuaG	55959	1825	59	1171	35	1210	40
O32077	yuaF	18706	22	1
O32086	yubA	43697	335	13	68	3	45	1
O32087	yuzA	8518	1905	89	1005	52	1563	78
O32090	pncB	56315	230	9	119	4	257	11
O32091	pncA	20738			23	1
O32095	yueF	40984	95	5	42	3	69	3
O32099	yueD	27149			195	6	170	4
O32103	yuiH	23135					19	1
O32105	yuiF	46135	30	1
O32106	pepA	53909	85	5	344	16	69	3
O32107	yuiD	17171	296	10	108	3	90	3
O32114	dapF	31193			30	2	71	1
O32117	yutJ	39751	57	2	54	2	45	3
O32124	yutG	18767			28	1
O32128	yutC	23744	454	21	101	7	71	4
O32145	pucC	30271	26	2
O32152	yurK	27663			54	2
O32157	frlB	37024	19	1			28	1
O32158	yurQ	14858			40	2	205	8
O32162	sufB	52981	233	11	586	31	231	12
O32164	csd	45065	148	9	422	18	247	16
O32165	sufD	48264	62	1	361	20	248	12
O32166	yurZ	13898			88	4	65	3
O32167	metQ	30393	1521	68	465	26	479	27
O32168	metP	23741	45	3
O32169	metN	37976	99	5	80	1	104	4
O32172	yusF	16992			36	2
O32173	yusG	9166					106	4
O32175	yusI	14014					24	1
O32180	yusN	13187			203	6	121	4
O32183	yusQ	15244					25	1
O32193	cssS	52122	129	6			64	3
O32198	liaS	40735	66	2			23	1
O32199	liaF	27007	85	3
O32201	liaH	25682					71	3
O32210	yvgN	31700			111	15	298	25
O32212	nhaK	75294	460	22	199	14	189	10
O32213	cysI	65168			41	3
O32214	cysJ	67502			226	11	52	3
O32215	helD	90382	139	10	214	13	146	10
O32218	bdbD	25004	1043	36	406	13	286	11
O32219	cadA	75643	126	8	183	7	30	1
O32220	copA	86199	120	4	66	3	41	4
O32223	yvaA	40145			117	5	90	4
O32224	azoR2	23257			848	32	848	30
O32225	yvaC	69550	346	13	56	3	29	1
O32229	yvaG	29048	96	3	326	11	159	9
O32231	rnr	88809	1022	66	5405	250	4481	219
O32232	est	28346			165	5	67	1
O32233	secG	7991	265	4	93	1	78	1
O32234	yvaM	29731	137	11	91	6	55	4
O32241	sdpI	23392	270	11	154	9	156	6
O32243	opuCC	34049	146	9	36	2	75	2
O32245	yvbH	23844			69	1
O32246	yvbI	26192	131	9	20	1	44	2
O32248	yvbK	17905			46	2
O32253	cggR	37473			94	3	45	3
O32254	yvbT	37078	64	3
O32264	yvcT	36710			140	8	162	7
O32267	tuaH	45962	139	8
O32268	tuaG	29611	48	4	51	2	50	2
O32269	tuaF	25119	676	20	255	6	248	7
O32272	tuaC	43363	47	3			21	1
O32283	yxzF	5911	27	1
O32291	yxnA	39447	68	2
O34305	ytoQ	16781	68	1	106	2
O34308	ytkK	28185			58	4	35	2
O34309	pps	97416	47	2	113	11	36	3
O34318	yloU	13239	67	1			71	2
O34324	acoL	49164					49	1
O34328	gmk	23261	20	1	154	4	124	7
O34340	fabF	44148	38	2	366	17	162	8
O34341	yebC	30712	271	13	102	3	77	4
O34344	sdpC	22321	51	3			26	2
O34348	yfmC	35113	344	11	33	2
O34353	ydjN	39686	166	6	21	1
O34355	ytcJ	58725			88	6	68	3
O34389	malS	62338	489	17	4026	130	5405	178
O34394	yjjA	29989			66	2	53	3
O34398	ligd	71015	61	2	76	4	47	2
O34402	yrrD	20058			58	1	58	2
O34403	mutM	31210	86	3	113	4	70	2
O34409	yflN	28812			274	13	65	1
O34411	hisK	30742	21	1	35	1
O34418	yfkI	12158	275	10	40	1	103	4
O34424	yteJ	19107	384	10	202	7	192	7
O34427	citS	59911	33	1
O34437	yfkH	30449	46	2	27	2
O34442	mgtE	50869	352	14	62	2	142	5
O34443	apt	18920			117	5	109	3
O34445	ylbN	20095			109	5	29	1
O34450	nagA	42767			116	3	29	1
O34454	ykaA	24000	402	13	941	33	349	16
O34459	hisZ	43648					44	2
O34470	ylbL	37627	835	30	330	10	352	12
O34471	ytlQ	36160			96	4	61	2
O34472	yrrI	39688	108	3			54	1
O34474	yoeA	51272	43	1
O34475	yfkO	25669			466	22	552	24
O34483	hprK	34794	22	2			37	2
O34484	mapB	27365			39	1	143	4
O34486	yfkQ	57843	87	4
O34493	ytmA	29714	153	6	27	2
O34495	ykoP	21589	57	2	28	1
O34499	pgl	38501			83	17	153	15
O34502	yvkA	47824			25	3
O34505	ythB	38876	420	16	162	9	256	14
O34506	yngL	14831	162	6	56	2	49	2
O34507	prkC	71879	963	49	443	21	309	16
O34508	ykfB	39619	144	7	64	5	40	2
O34512	yfmM	59402	30	1	72	4
O34521	nagP	48777	726	27	329	14	220	12
O34522	trmB	24488			76	5	74	4
O34525	sppA	36650	416	10	81	2
O34526	alaS	97391	1519	52	1789	69	418	25
O34528	yrvN	46656					31	1
O34529	pfkA	34404	246	6	620	20	295	9
O34530	rsgA	34118			50	1	26	1
O34533	ytcD	14657	39	1	43	1	31	1
O34543	mhqE	33830					21	1
O34558	yopR	37589	35	2	85	4	73	3
O34564	ykuU	20548			134	5
O34569	yoaA	20427			117	2	31	1
O34570	ytlP	21133			75	3	137	5
O34580	pcrA	83617	319	10	488	17	213	9
O34586	ylbC	39664	256	10	40	1
O34588	ykuJ	9296			39	3	50	2
O34591	acoB	36936					43	3
O34592	ydjP	30661	39	2	259	7	64	2
O34594	cccB	12092	325	7	54	1	58	1
O34595	thiI	45665	48	2	50	1	49	3
O34599	iscS1	41280	31	1	53	3	126	9
O34600	nrnA	35234			105	5
O34617	rlmN	41885	183	5	187	8	178	7
O34618	ytnA	50409	79	2
O34623	dnaE	125784	164	7	55	3	28	2
O34624	yebE	20653	191	5	34	1
O34628	yvlB	41284	174	8	406	18	257	8
O34629	yerH	44546	464	17	80	10
O34631	yvrA	48886			19	1
O34638	ykoH	50676	25	1
O34641	ytrB	33855	45	1	39	1	41	2
O34654	yodI	9245	37	1	123	7	52	2
O34659	ybbR	52875	373	20	62	3	57	4
O34660	dhaS	54190					60	4
O34666	ctpA	51117	309	14	79	2	25	1
O34667	luxS	17931			60	3
O34669	yocH	30163			30	1
O34683	hisB	21592			40	2
O34689	mhqA	35365			63	4	73	4
O34691	naiP	43908	64	3	86	4
O34693	yloA	65490	86	3	113	7	61	3
O34697	bceA	28274			44	2
O34705	ytpA	29604	216	10	230	9	39	2
O34717	fadH	27337	279	11	398	20	172	9
O34725	yjhA	24020	227	10	61	5	64	3
O34726	yflS	51399	225	14	87	6	78	5
O34741	bceB	72254	102	16	23	3
O34743	ylbA	13485			72	1	229	6
O34745	yodF	53901	121	4	25	1	30	1
O34746	fabHA	33938			185	11	201	11
O34748	recQ	67937			21	1
O34750	yfmL	42277	460	24	403	21	435	23
O34751	yloV	59574	36	2	174	7	28	2
O34752	lgt	30656	302	7	89	5	111	2
O34753	tagO	39337	57	3	50	1
O34757	desK	42760	28	1
O34758	yrrL	40476	240	8	39	1
O34782	yvrD	28204	27	1	156	7	161	6
O34783	ykuS	8716					349	8
O34784	yobI	140704	423	19	274	16	114	11
O34788	bdhA	37489	196	8	432	15	315	16
O34790	pcrB	25300			30	2
O34806	ytfJ	16336	1509	70	916	57	1996	100
O34812	yfmJ	36754			73	4	97	5
O34814	ftsE	25604	76	1	190	5	147	6
O34824	glmM	48574			237	13	151	8
O34827	ykuM	34005	70	2	35	2
O34828	yrzB	10873					43	1
O34840	chaA	37611	276	14	201	7	146	6
O34842	mhqD	22475			24	1	56	2
O34847	accA	36482	191	6	278	10	386	14
O34859	ku	35214	323	17	295	16	288	14
O34860	rsbRB	32424	121	3	375	12	76	4
O34863	uvrA	106650	1287	49	1195	43	764	31
O34872	ytiB	21269	73	2	49	4	49	2
O34874	iscS2	41576	95	5	87	3	79	3
O34876	ftsX	33078	330	10	58	4	49	4
O34885	ydiS	40008			53	1	22	1
O34894	ezrA	65013	382	17	159	13	88	7
O34909	yerA	67002	34	2
O34910	yobT	25495					28	1
O34912	hisI	24057			84	3	71	2
O34915	yobE	25453			18	2
O34916	ykuR	41645	25	1	60	8
O34917	ytfI	25417	129	3	48	2	55	3
O34921	ytoI	49007	89	5	29	1	51	3
O34924	ytoP	39440	60	3	99	4	33	1
O34925	deoD	25533			167	7	151	4
O34930	rapK	44044			25	1
O34932	coaE	22000			36	1	39	1
O34934	ppnK2	30462	319	12	342	21	97	7
O34943	ytpR	21854			33	1
O34944	ytjP	51306			80	7	44	7
O34946	znuC	26474	87	2	106	5	119	5
O34948	ykwC	30806			252	9	220	7
O34961	yjmB	50502			27	1
O34962	ytsJ	43811	50	5	133	13	114	10
O34966	znuA	35752	249	7	174	6	77	4
O34968	yerB	37117	66	4
O34969	yfjR	30512					219	5
O34977	ythP	26718	99	2	97	3	111	3
O34979	yvrO	25519			61	4	25	3
O34981	dapH	25002	32	1	120	8	70	4
O34987	pbuG	46275	341	7	69	1	144	4
O34990	purU	34627	99	3	55	1
O34992	opuCA	43334					22	2
O34994	ccpN	23969			27	1
O34996	polA	99030	1106	45	909	41	734	39
O35000	nagB	27089			83	2	26	1
O35006	hisA	26570			74	2	105	3
O35008	ytqA	37140	49	2
O35010	ykfC	33232			45	3	108	4
O35011	rpoZ	7749					32	1
O35014	ykuI	48041			59	1
O35020	mnmA	42234			170	6	107	6
O35022	azoR1	22963					36	1
O35025	ydiR	35404					25	1
O35028	yfkR	42941	330	15	56	3	96	2
O35029	ythQ	45417	34	1
O35033	coaBC	44235	136	6	189	8	179	12
O35043	yfkC	32243	32	1	34	1	26	1
O35044	bceS	38911	60	3
O54408	relA	85056	814	33	502	27	366	27
P02394	rplL	12743	206	4	613	21	473	18
P04831	sspA	7066	171	5	164	5	349	9
P04832	sspB	6975	72	2	99	3	479	13
P04969	rpsK	13973	2339	54	1282	34	1693	46
P05306	sacP	49422	91	3
P05648	dnaA	50828			272	10	255	13
P05649	dnaN	42134	117	5	85	4	42	3
P05651	recF	42278	64	1	37	1	65	3
P05652	gyrB	71573	231	12	807	36	428	27
P05653	gyrA	92099	1207	61	1801	76	959	46
P05657	rpmA	10366					100	4
P06224	sigA	42922	443	20	454	24	273	17
P06629	ywjG	19224	54	1	68	2
P07343	fumC	50671	147	5	704	25	421	22
P07788	cotA	58690			103	11
P07789	cotB	42946			58	2
P07790	cotC	8868			29	2
P07860	sigF	29411			139	8	115	6
P07869	gerAB	41603	37	2
P07908	dnaB	54855			24	1
P08064	sdhC	22916	114	4	62	5	107	6
P08065	sdhA	65395			81	4	30	2
P08164	nadE	30376					296	8
P08750	dacA	48777	1032	45	192	10	228	14
P08821	hupA	9878	207	5	475	12	927	27
P08838	ptsI	63153	234	10	1216	60	732	45
P08877	ptsH	9184			121	2	423	14
P09122	dnaX	63180	55	2	46	2
P09124	gapA	35924	811	34	2551	92	2296	91
P09339	citB	99614			178	7	84	8
P0CI73	glmS	65639	29	1	239	11	126	10
P0CI75	birA	36274	29	1
P0CI78	rplX	11135					39	1
P10725	alr1	43523	39	2	54	2	50	3
P10728	spoIIAB	16459			20	1
P11863	cotT	10125			46	4
P11998	ribH	16390	309	9	69	3	28	1
P12011	gntK	57475	89	5	56	6
P12012	gntP	46682	54	2			34	1
P12013	gntZ	52292			247	12	294	15
P12040	purN	21649			34	1
P12045	purK	42635	22	1
P12047	purB	49624	321	12	867	39	1413	67
P12048	purH	55776			549	21	287	12
P12310	gdh	28072	1185	34	4368	116	4433	136
P12425	glnA	50531	704	34	1278	66	703	44
P12464	rpoE	20387			59	1
P12873	rpmC	7708					41	1
P12874	rpsQ	10193	20	1	226	13	249	12
P12875	rplN	13260	110	3	200	7	240	11
P12877	rplE	20135	464	18	1673	64	1993	71
P12878	rpsN1	7469					37	1
P12879	rpsH	14868	230	9	720	23	860	32
P12946	ctaA	34462	18	1	22	1
P13242	pyrG	60080	512	18	800	36	448	20
P13243	fbaA	30552	464	16	1720	73	1090	38
P13267	polC	163416					48	11
P13484	tagE	78369	263	12	332	17	156	9
P13485	tagF	88236	321	29	249	27	91	7
P13792	phoP	27638			49	2	52	2
P14016	cotE	21078			623	28	79	3
P14192	glmU	49865			38	3
P14193	prs	35132	405	16	463	18	421	15
P14194	ctc	22042					117	8
P14577	rplP	16180	436	11	551	16	834	24
P14802	yoxD	25283	38	2	163	5	387	11
P14949	trxA	11500			103	4	177	10
P14951	uvrC	68771	64	5	138	6	46	4
P16263	odhB	45975	80	5	105	6	73	5
P16304	adk	24332			70	2
P16336	secY	47213	1057	51	501	27	492	28
P16450	gerD	21218	444	13	57	1
P16524	patA	43736	21	1	39	3
P16971	recA	38036	30	1	61	5	64	5
P17617	ypuF	21179			31	1
P17618	ribD	39565			50	1
P17620	ribBA	44436			132	4	49	3
P17622	ribT	14621			22	2
P17631	dnaJ	41533			70	4	46	1
P17731	hisC	40297	36	2	70	2	149	5
P17820	dnaK	66019	127	14	3263	119	2793	109
P17889	infB	78630	1294	54	3934	132	2919	111
P17893	argR	16936	25	2	19	6	23	3
P17894	recN	64639	120	3	27	1	24	1
P17921	pheS	38936	216	9	178	10	207	9
P17922	pheT	88062	882	28	1364	50	718	35
P18157	glpK	55217	414	15	365	12	449	23
P18158	glpD	62585	407	15	796	28	803	32
P18159	pgcA	64794	87	1	685	31	944	41
P18185	carB	113183			33	1
P18255	thrS	73640	375	14	1142	45	563	26
P18579	murB	32901	31	1	172	6	129	4
P19406	phoA	50243			28	2
P19465	folE	21320	46	3	366	24	46	3
P19466	mtrB	8323			18	1
P19582	hom	47579	368	13	494	23	382	16
P19669	tal	22957	394	17	1175	54	348	15
P19670	murAB	46142	82	6	130	4	62	6
P19672	yqxC	31425					25	1
P19946	rplO	15373			34	1	99	5
P19947	rpmD	6634			33	3	154	4
P20166	ptsG	75591	3499	127	2257	88	1649	67
P20277	rplQ	13742	45	1	121	6	458	14
P20282	rpsM	13779	711	29	733	30	1065	52
P20429	rpoA	34835	1252	38	2759	94	1686	64
P20458	infA	8208	22	1
P20487	fliJ	17897			31	5
P20691	aroE	45383	113	4	169	6	75	3
P20692	tyrA	41466	63	1	76	3	51	3
P20964	obg	47659	162	9	531	23	934	37
P21203	pheA	32109			28	1
P21341	paiB	24325					31	5
P21464	rpsB	28007	690	29	2080	90	1958	83
P21465	rpsC	24308	598	20	2172	73	4263	150
P21466	rpsD	22821	327	19	1544	79	2261	97
P21467	rpsE	17612	1029	38	1171	39	2490	96
P21468	rpsF	11118			39	1	62	4
P21469	rpsG	17872	412	15	289	13	663	27
P21470	rpsI	14300	32	2			128	8
P21471	rpsJ	11658	28	1	179	5	306	12
P21472	rpsL	15263	271	11	614	36	1310	64
P21473	rpsO	10567	36	4	47	4	61	5
P21474	rpsP	10128					173	8
P21475	rpsR	9021					52	3
P21476	rpsS	10577			51	2	60	6
P21477	rpsT	9593	40	1	46	2	42	2
P21656	trpS	37287	45	3	168	9	39	2
P21879	guaB	53129	922	44	1375	56	1340	64
P21880	pdhD	49873	190	12	1745	59	1176	42
P21881	pdhA	41522	809	34	1113	60	1050	54
P21882	pdhB	35452	2141	71	1769	57	1517	53
P21883	pdhC	47567	1098	51	2155	114	1462	81
P21885	speA	53721	35	2	45	3	33	1
P22250	gltX	55802	113	5	608	29	586	31
P22322	gpr	40315	199	9	485	20	428	24
P22326	tyrS1	47765	317	9	434	18	607	30
P23129	odhA	106440	613	26	626	25	230	12
P23261	cotF	18714			263	11
P23477	addB	135130	44	2
P23545	phoR	65309	842	31	205	9	197	8
P23630	lysA	48886	38	1	81	3
P23715	argC	38164	73	1	170	4
P23914	levR	106165			89	2
P23966	menB	30108	357	10	931	32	469	14
P23970	menD	64451			63	1
P24011	ctaC	40354	320	15	169	7	160	9
P24012	ctaE	23251	60	1
P24072	cheY	13358					35	1
P24136	oppD	39739	443	17	204	7	363	16
P24137	oppF	34840	244	10	87	6	222	8
P24138	oppB	34109	408	12	155	5	139	7
P24139	oppC	33656	1269	32	277	6	349	8
P24141	oppA	61543	4654	200	1748	85	2028	118
P24327	prsA	32547	3748	132	895	40	1391	53
P24469	cccA	12872	384	11	44	2	34	2
P25053	tenI	22971	89	14	33	4	38	5
P25144	ccpA	36917	88	2	295	8	232	7
P25149	ywaF	27396	25	1
P25503	hutU	60847					25	1
P25811	mnmE	51114	42	2	66	3	108	5
P25812	mnmG	69937					39	3
P25813	rsmG	27165	159	3	131	4	85	2
P25972	pyrE	23735	26	1
P26382	levG	30181	107	5
P26497	spo0J	32191					73	4
P26899	ansB	52699	119	5	109	6	82	5
P26900	ansA	36659			44	1
P26901	katA	54757			64	2	27	1
P26902	dppA	30367	23	3	95	8	35	3
P26908	rplU	11268	61	1	116	3	490	17
P27206	srfAA	402750	183	8	217	11	106	5
P27876	tpiA	27241			173	8	212	7
P28366	secA	95698	575	20	1012	48	574	31
P28367	prfB	42161			48	3	119	6
P28598	groL	57389	1270	39	3354	106	1632	56
P28599	groS	10169			84	3	51	1
P28619	rph	26779	276	6	328	9	246	7
P28628	sipS	21034	597	36	91	6	79	4
P28670	yoxC	11385	31	1
P28671	yoxB	28662	39	1
P29726	purA	48109	109	5	385	19	39	4
P29727	guaA	58211	50	5	1183	62	992	62
P30300	glpP	21652			125	7
P30949	hemL	46591	59	5	274	12	82	6
P30950	hemB	36414	48	1	153	8	21	2
P31102	aroB	40962	350	14	417	19	399	22
P31103	ndk	16948			34	1
P31104	aroF	42893	84	3	298	10	373	17
P31105	cheR	30048			23	1	49	2
P31114	hepT	39605	68	1	32	1
P31845	spoVAF	55552	2866	95	1736	60	1525	61
P32081	cspB	7361					41	1
P32396	hemH	35383			62	3	22	2
P32397	hemY	51399	45	2	41	1	41	3
P32399	yhgE	84042	20	3			20	1
P32436	degV	31731					31	2
P32726	rimP	17670			64	12	43	4
P32727	nusA	41757	79	3	600	26	544	26
P32729	rplGA	11104					152	3
P32731	rbfA	13379	73	4	174	6	149	4
P32732	truB	34468			38	2	53	2
P32959	pbpE	51405	170	6	527	16	277	13
P32960	racX	25555			28	1
P33166	tuf	43680	3474	120	13402	442	8666	293
P34956	qoxB	74017	1184	60	766	41	719	43
P34957	qoxA	36316	1397	70	894	43	521	25
P34958	qoxC	22771	88	2
P35136	serA	57265	1014	35	1664	60	1614	62
P35146	aroC	28171					27	1
P35149	spoIVA	55197			87	6
P35159	rluB	27721			118	8	366	17
P35160	resA	20166	204	4	52	1	56	1
P35161	resB	62007	158	11			21	1
P35162	resC	43720	252	7	51	2
P35163	resD	27555	92	2	246	7	357	11
P35164	resE	66730	256	13	105	11	50	7
P36430	leuS	91599	296	10	1394	56	1211	56
P36946	rbsD	14276			46	1
P36947	rbsA	54612					27	1
P36949	rbsB	32264	401	13	48	2	76	3
P37105	ffh	49509	513	22	376	21	443	23
P37437	rplI	16342					29	2
P37455	ssbA	18788	26	1
P37464	serS	48982	214	10	500	28	286	17
P37465	metG	76197	550	24	1910	73	1962	79
P37468	rsmA	32758	143	7	200	10	229	10
P37470	spoVC	20973			36	1	40	1
P37471	divIC	14712			29	1
P37472	hprT	20227			481	23	150	6
P37474	mfd	133786	1828	75	1392	53	906	53
P37476	ftsH	71064	11814	435	6478	264	5068	237
P37477	lysS	57503	492	20	991	45	836	41
P37478	yycF	27323			71	4	35	3
P37483	yycA	73660	63	2
P37484	yybT	74450	498	17	280	16	187	6
P37485	yybS	34625	56	3
P37487	ppaC	34139			322	12	114	4
P37489	yybO	48331	245	9	74	3	110	5
P37491	yybM	29443	20	1
P37494	yybJ	24314	50	2	144	4	213	7
P37512	yyaL	79161	39	4	1040	39	657	29
P37513	yyaK	34042	45	1
P37518	ychF	40272	234	8	584	13	393	13
P37522	soj	27754			72	4	29	2
P37526	yaaC	38124	33	1	46	2
P37527	pdxS	31705	731	21	1046	36	481	17
P37528	pdxT	21604			175	6	167	5
P37529	dck	25485			26	1	20	1
P37531	yaaH	48607			151	8
P37535	yaaN	43803	130	8	57	3	132	5
P37538	yaaQ	11959					46	1
P37545	yabD	29385	35	2	96	4
P37550	ispE	31927	133	3	205	7	80	5
P37551	purR	31209	67	2	55	2	85	4
P37552	yabJ	13702			61	1
P37554	spoVT	19787	138	4	1056	49	982	42
P37556	yabN	56242			82	4
P37563	tilS	53887	59	3	73	4	77	4
P37565	hslO	32019			63	4
P37566	yacD	34189	270	8	49	1	54	1
P37568	ctsR	17789	33	1	53	2	62	2
P37570	yacI	41383	577	17	278	11	213	8
P37571	clpC	90120	5359	184	3898	146	2888	117
P37573	disA	40766	71	3	131	5	86	2
P37580	fhuD	34462	214	7	56	1	58	1
P37585	murG	40025	325	17	243	15	124	12
P37807	rpmB	6862					46	6
P37808	atpA	54679	1084	39	1149	48	1753	86
P37809	atpD	51388	1134	36	1335	46	828	34
P37810	atpG	31635	941	30	361	10	280	13
P37811	atpH	19970	90	5	103	6	130	4
P37813	atpB	27036	473	14	464	10	151	4
P37814	atpF	19196	1635	65	458	21	643	25
P37869	eno	46610	1418	49	3034	105	1518	57
P37870	rpoB	133831	10238	380	8538	345	4715	213
P37871	rpoC	134795	15179	596	10431	434	6746	291
P37872	ybxB	22557					41	1
P37876	ytxK	37384	39	2	101	9	157	10
P37877	ackA	43167	393	13	1159	41	1453	50
P37887	cysK	32799	26	1	151	4	79	6
P37940	bfmBAA	36482	123	6	72	6	43	3
P37941	bfmBAB	36004	159	5	277	12	280	13
P37942	bfmBB	45979	349	16	168	11	212	10
P37944	aroK	22137					34	1
P37945	lon1	86667	2284	106	3038	134	2283	102
P37948	glpT	50054	142	8	22	2
P37949	lepA	68829	195	6	658	24	704	27
P37954	uvrB	76451	112	4	657	37	490	29
P37955	splA	9206					18	1
P37956	splB	40146	495	27	646	35	561	34
P37959	yusZ	30770					22	1
P37960	mrgA	17322			75	1
P37967	pnbA	54066			106	3	89	6
P38021	rocD	44134					38	1
P38049	hmoB	18816			35	2	120	4
P38050	pbpF	79216	1913	66	977	37	700	28
P38422	dacF	43327			139	8
P38423	yqxK	42775			60	2	32	1
P38424	engB	22013			295	11	169	8
P38490	ypeB	51210	4062	171	6038	242	6152	251
P38493	cmk	25081					61	4
P38494	ypfD	42376			1237	52	1118	55
P39062	acsA	65022					403	28
P39070	clpQ	19523			96	1
P39071	dhbA	27608			94	2	146	3
P39074	bmrU	32706	165	5	127	6	112	6
P39120	citZ	41760					284	21
P39121	deoC	23474			134	4	81	2
P39123	glgP	92040			32	2
P39124	glgD	39605					26	1
P39126	icd	46503	1193	59	2223	128	2355	129
P39137	rocE	51942	80	1
P39138	rocF	32191	26	1	300	12	54	2
P39141	nupC	42525	92	5	89	6	44	3
P39142	pdp	46178	227	6	523	23	407	16
P39148	glyA	45575	694	22	1662	47	700	25
P39149	upp	23079			267	20	134	9
P39155	ywlE	16889	32	2
P39456	tcyC	27788	224	7	26	3	53	2
P39569	gerBA	54042	399	12	25	2	36	3
P39571	gerBC	42556	219	18
P39574	galK	43893	96	4	33	1	142	3
P39575	galT	58840			20	1
P39576	ilvK	40324			18	1	22	1
P39577	dltE	28426					49	3
P39578	dltD	44780	110	7	41	1
P39580	dltB	46933	45	1
P39587	ywbD	44416			207	8	174	8
P39589	ywbF	44265			28	3
P39592	ywbI	34826			27	1
P39593	thiM	28367	23	1	51	3
P39604	rodA	43417	46	3	19	2	28	1
P39605	nfrA1	28416			274	9	312	13
P39610	pdxK	29113	75	4	162	8
P39616	ywdH	50818	26	2
P39620	gerQ	20263			146	8
P39634	rocA	56513			280	18	118	9
P39644	ywfH	28175	173	11	109	4	194	7
P39645	ywfI	29543	24	1	382	21	176	7
P39646	pta	34883			132	6
P39667	nadR	20030					29	2
P39668	yyxA	42762	1328	46	563	26	1089	47
P39738	fliD	54472			31	1
P39751	mbl	36009	615	22	455	20	453	19
P39760	ktrC	24390			138	7	70	3
P39761	adeC	62966	25	1	38	4
P39762	ampS	45770			288	12	585	15
P39765	pyrR	20308	60	2	80	2
P39766	pyrP	45537	22	2
P39772	asnS	49167	746	28	878	38	1178	54
P39773	gpmI	56388	60	3	676	24	536	25
P39778	clpY	52553	347	14	575	23	616	23
P39779	codY	28995	322	18	1342	51	1702	68
P39786	xtmB	51403					29	1
P39788	nth	25440	60	1	44	1
P39791	yppC	38570	64	1			24	2
P39793	ponA	99502	1099	45	278	18	47	5
P39794	treP	50025	43	2
P39795	treA	65314					20	1
P39801	cotG	24399			28	2
P39803	yitT	30516	141	7	52	3	35	2
P39814	topA	79769	439	15	490	23	185	9
P39815	trmFO	48261			110	6	109	7
P39820	proB	39321					32	1
P39821	proA	45452	75	2	160	5	226	7
P39840	galM	37262	29	2	59	3	34	3
P39846	ppsB	291122					34	3
P39912	aroA	39629			123	5	32	1
P39914	ytxJ	12451			165	4	149	3
P40397	yhxC	30940	782	24	575	19	221	10
P40398	yhxD	32003					30	2
P40420	glcU	30872	505	37	342	25	216	17
P40737	yxxD	17654			30	1
P40740	bglH	53312			59	3	62	5
P40750	pbpD	70842	108	5	37	1
P40769	yhfN	48901	82	2
P40778	murC	48619			358	12	303	15
P40779	ytxG	15432	837	23	328	9	514	14
P40780	ytxH	16544	704	17	549	19	728	22
P40806	pksJ	565483	35	5
P40866	spoVAA	23926	284	7	83	1	61	1
P40868	spoVAC	16212	1680	43	499	12	357	10
P40869	spoVAD	36319	55	3	368	8	287	9
P40870	spoVAEA	21841			26	1	70	2
P40924	pgk	42221	63	5	903	37	1068	48
P40948	corA	37741	103	9	30	3
P42060	rplV	12452	135	9	196	5	473	15
P42084	hutI	45649	39	2	129	4	59	2
P42095	recO	29594	25	1			44	3
P42108	yxaI	16992	84	3	298	13	434	17
P42182	era	34053	305	14	461	16	415	15
P42199	tcyA	29553	2647	90	1133	45	705	29
P42200	tcyB	26429	46	2
P42236	ycbD	52667			48	4	31	2
P42242	ycbJ	34459			126	5	66	3
P42248	ycbP	14101	91	5	36	4	28	2
P42297	yxiE	15989					28	1
P42305	dbpA	54242	119	5	388	19	460	27
P42312	nupG	43861	161	4	135	2
P42318	yxjG	43366			26	1
P42400	yckB	31757	120	8
P42403	bglC	55390			44	2	35	3
P42409	rsbRA	31087	219	8	112	3
P42412	iolA	53761	104	9			32	6
P42414	iolC	35724			38	1	44	2
P42415	iolD	70621			27	1
P42418	iolH	33560					59	1
P42421	yxdJ	26641					65	2
P42422	yxdK	38136	35	2	27	1
P42425	lon2	60505			27	2
P42435	nasD	89288	28	3
P42919	rplB	30312	1872	81	1278	63	1931	96
P42920	rplC	22669	232	7	846	26	906	28
P42921	rplD	22377	433	21	1224	48	516	36
P42923	rplJ	18068	367	12	1615	68	799	36
P42924	rplW	10949	50	1	272	14	520	26
P42953	tagG	32220	162	6	116	3	70	3
P42954	tagH	59377	91	4	63	5	55	3
P42956	mtlA	50210	56	1
P42958	ycsA	38818	204	5
P42962	ycsE	28225	29	1	325	8	234	6
P42964	ycsG	42164	221	8			20	1
P42969	lipC	23762			40	1
P42971	pbpC	74531	185	17	152	8	52	8
P42973	bglA	54921					38	2
P42974	ahpF	55125	108	6	524	23	623	37
P42976	dapB	29526			46	4	55	1
P42977	cca	45481			26	1	26	1
P42978	ypjC	32054	168	10	33	3	126	4
P42980	mgsA	15176			54	1	44	1
P42982	ypjH	42237			70	3	63	2
P45693	spoVS	8848					58	2
P45694	tkt	72356	639	21	3221	107	1416	67
P45708	yneF	8293	290	11	89	5	175	12
P45711	yneK	16978	35	2
P45864	uvsE	36930	233	8	121	7	62	1
P45865	clsB	46041	664	39	269	18	263	19
P45866	fadF	79877	34	1
P45869	ywkB	33734	1012	47	389	22	394	26
P45872	prfA	40322			67	3	139	7
P45913	yqaP	34759	29	1			53	1
P45914	yqaR	18101	37	1
P45919	yqbC	25236	111	5	34	1	35	1
P45936	yqcA	22234	24	1
P46208	htpG	72440	120	4	454	18	257	12
P46322	pgsA	21325	327	7	136	7	152	4
P46323	cinA	45738	66	5	164	10	334	21
P46328	yxbD	18302			21	1	33	1
P46336	iolS	35146			42	1	304	9
P46337	iolR	28559			25	1
P46343	phoH	35519	181	7	394	11	557	21
P46344	yqfF	79345	1410	52	504	31	311	16
P46348	yeaB	31822					30	1
P46353	drm	44105			380	16	772	36
P46354	punA	29165			320	12	175	6
P46898	rplF	19497	24	2	408	13	705	28
P46899	rplR	12961	100	2	70	3	303	13
P46905	yccK	34836			116	4	235	8
P46906	argS	62798			433	22	586	26
P46911	qcrA	18952	1149	41	72	3	261	10
P46912	qcrB	25528	1123	44	359	16	321	13
P46913	qcrC	28258	592	30	199	12	241	13
P46914	cotS	41286			27	1
P46917	ggaA	53457	25	1
P46919	gpsA	37527	353	14	252	9	401	19
P46920	opuAA	46439	608	28	720	31	682	36
P46921	opuAB	30228	595	43	92	14	76	9
P46922	opuAC	32251	1409	50	327	15	286	13
P49778	efp	20455			122	3	128	4
P49787	accC1	49706	136	8	441	17	154	8
P49814	mdh	33623					186	10
P49849	mutS	98055	27	3	45	14
P49851	ykhA	19457			20	1
P49852	hmp	44758			192	6	81	3
P49853	ykjA	27690	199	6	131	4	85	2
P49936	fhuB	40922	50	1
P49939	gerKA	60519	347	22	112	6	110	6
P49940	gerKB	41857	177	6	80	2	33	2
P49941	gerKC	45921	737	26	300	8	360	10
P50620	nrdE	80979	28	1	67	4	112	5
P50733	ypbG	28656	52	2			56	2
P50736	ypdA	36558	99	3	174	7	136	4
P50739	sleB	34151	252	14	1525	52	2335	78
P50742	yphB	32967	558	24	81	4	321	9
P50743	der	48796	94	4	694	25	971	41
P50831	ypvA	74709	91	3	133	6	79	5
P50840	ypsC	43708	189	6	201	5	250	11
P50843	kduI	31229			110	6	62	1
P50848	ypwA	58252			193	12
P50849	pnp	77586	610	23	4617	161	2846	117
P50863	salA	38671			53	2
P50866	clpX	46721	1697	62	2554	99	2669	102
P51777	cspD	7305					25	1
P51785	ilvD	59862			62	4	57	4
P51831	fabG	26323			103	3	18	1
P51833	rnc	28465	53	2	98	3	116	4
P51835	ftsY	36377	193	7	453	13	398	13
P52035	bsaA	18415			76	4	37	1
P52996	panB	29853			117	2	57	3
P52998	panC	31995			114	5	85	3
P53001	aspB	43289	36	2	175	9	110	8
P53555	bioK	50421			67	5	55	4
P53560	ytbQ	28273			132	4	64	3
P54154	msrA	20341			84	4	30	2
P54156	yplP	37301					24	1
P54157	bcsA	40972	255	14	337	13	135	5
P54164	ypeP	25894	19	1	201	9	97	4
P54167	metA	35462			66	4	47	3
P54169	ypgR	42599			83	14	272	15
P54178	ypmQ	21932	80	4	28	1
P54179	ypmS	21075	206	5
P54182	ypoP	16913					30	2
P54304	hemN	43032			30	1	24	1
P54374	aroD	30760	63	5	192	9	158	10
P54375	sodA	22476			559	25	183	11
P54377	gcvPB	54564			122	5	62	4
P54378	gcvT	39954			98	3	145	6
P54380	glyQ	34186	82	5	94	5	81	4
P54381	glyS	76243	226	13	895	35	425	26
P54382	folD	30837	52	5	154	14	175	14
P54389	ypiA	48291					24	1
P54391	ypiF	17256					42	1
P54394	dinG	106251	414	15	242	16	125	7
P54396	ypmB	17885	141	5			41	2
P54417	opuD	56314	190	5	54	2	83	4
P54418	pckA	58520	25	2	56	1	93	4
P54419	metK	44301	264	12	585	20	321	17
P54428	yrkA	49011	43	2
P54448	yqeC	32805	49	1	200	12	78	5
P54451	yqeF	27736	110	2
P54452	yqeG	20132	237	8	114	5	95	4
P54453	yqeH	41315	206	12	240	14	281	11
P54455	nadD	22142			36	2	42	1
P54456	yqeK	21326			56	1
P54457	rsfS	13405	67	1	246	6	72	2
P54458	yqeM	28540			73	2
P54460	prmA	34567					38	2
P54461	rsmE	29126			23	1
P54465	yqeZ	46433	611	14	164	3	131	3
P54466	yqfA	35676	11145	287	5735	157	5067	146
P54467	yqfB	15761	100	4	22	1
P54470	yqfL	30501	103	3	165	12	92	6
P54471	trmK	26260					36	1
P54472	yqfO	41065	34	2	206	13	35	3
P54475	cshB	50053	208	10	867	34	871	38
P54476	nfo	33219			23	2	28	1
P54479	zur	17025			84	2
P54481	yqfX	13893	592	20	210	7	713	28
P54482	ispG	40843	58	3	147	6	134	5
P54485	yqgB	28494	180	10	68	2	79	4
P54486	yqgC	17341	97	1
P54487	yqgE	48286	506	25	71	8	106	7
P54488	yqgF	80093	160	8	102	5
P54492	yqgO	6907	385	13	217	8	212	8
P54493	gluP	56540	131	8	26	1
P54495	glcK	33925	137	9	80	4	54	3
P54508	yqhG	30978	53	1	37	2	45	1
P54509	yqhH	64916	48	3	37	3	38	2
P54510	yqhL	14670	325	18	77	5	116	9
P54511	lipM	32277	58	2	103	3	102	3
P54516	yqhR	20261	196	5	32	1	99	5
P54517	yqhS	16421			29	1
P54518	yqhT	38153			111	12	63	3
P54519	yqhY	14682	158	4	407	13	187	5
P54523	dxs	69629	124	8	88	6	78	2
P54524	yqiG	40894			137	4	250	8
P54529	yqiR	77995					27	1
P54530	yqiS	31841	239	9	213	9	118	4
P54531	yqiT	40195	58	3	213	9	333	20
P54532	buk	39853	238	13	256	8	246	14
P54533	bfmBC	50632	18	1	49	1
P54534	yqiW	16357			67	2	77	2
P54535	artP	28409	2061	70	1397	46	1483	40
P54536	artQ	23939	1000	27	451	10	422	13
P54537	artM	26989	100	9	288	20	183	16
P54538	yqjA	37179	47	3	19	1
P54542	yqjE	39793			572	18	703	27
P54547	zwf	55768	197	8	1248	69	1492	73
P54550	namA	37674			209	10	94	5
P54553	yqjP	35848	28	1
P54554	yqjQ	28492	158	7	95	6	109	4
P54556	coaA	36617			53	2
P54564	yqkA	39185					34	2
P54567	yqkD	34852	45	4
P54569	yqkF	34753			87	2	89	2
P54571	mleN	50293	58	2
P54572	yqkJ	46203			54	2
P54574	fur	17645			76	2	47	1
P54575	ribC	35754			21	1
P54585	yhcA	58474	874	35	348	19	181	15
P54586	yhcB	19174	1171	25	655	14	741	16
P54587	yhcC	13949	295	15	154	9	85	3
P54597	yhcM	17020	1767	44	303	12	653	18
P54598	yhcN	21061	4349	154	1760	73	2793	102
P54601	yhcQ	24946	891	27	2651	105	2918	120
P54604	yhcT	33824	35	2	98	5	119	6
P54607	yhcW	24774					43	2
P54608	yhcX	60636	207	11	339	23	265	26
P54616	fabI	28027	768	27	925	39	568	33
P54617	ydjF	25182					82	2
P54716	glvA	50766	61	1	25	3	131	8
P54721	catE	31602			28	1
P54940	yxeA	13067	22	1
P54941	yxeB	35541	31	1
P54943	yxeD	13793	94	4
P54947	yxeH	30375			22	1
P54952	yxeM	29349	612	14	35	1
P55179	pepT	45538			212	10	102	2
P55180	galE	37214	139	6	282	11	300	14
P55339	ecsA	27818	152	5	182	6	26	1
P55340	ecsB	47269	146	7	95	3
P55341	ecsC	26752	25	5			24	1
P55342	yllA	62743	332	11	253	18	330	15
P55872	infC	19834	35	1	472	14	393	15
P55873	rplT	13630	595	23	384	19	444	23
P55874	rpmI	7552	171	6	101	3	192	7
P56849	rpmGA	6068					40	1
P68569	bdbA	16285	48	3	26	1
P68579	sunT	82083	29	1
P70945	yitS	31428			54	4	57	5
P70947	yitU	30728	27	1			20	1
P70948	yitV	29045			72	3	41	2
P70970	ecfAB	30559	83	2	65	3	42	1
P70972	ecfT	29822	35	1
P70973	truA	28085			22	1
P70974	rplM	16365	148	3	368	11	406	15
P70995	ywhC	24687	33	1	27	1
P70998	speE	31316			159	9	99	6
P71003	ywhK	49679			21	1
P71009	albC	27387			26	4
P71012	fruA	67255	2448	95	1215	61	1088	54
P71013	sipT	21841	1061	40	220	12	90	6
P71017	gbsB	43621			56	1	39	1
P71018	plsX	35798	278	14	404	17	234	11
P71019	fabD	34128			30	1	37	4
P71037	ywnB	23182					29	2
P71039	mta	30088					19	1
P71040	clsA	55888	186	11	100	4	34	3
P71042	ywnG	18452	48	3
P71044	spoIIQ	31094	35	1
P71045	ywnJ	16179					25	4
P71055	epsF	42938					20	1
P71063	epsM	22526					31	1
P71070	yukC	52129	320	15	66	4	173	7
P71079	fabL	27275	264	6	433	16	217	8
P71082	ygaD	65783	126	7	49	5
P71083	ygaE	40766	61	3
P71084	gsaB	46269	46	3	150	9	99	2
P71086	perR	16641			51	2
P71088	spo0M	29772	163	5	559	20	128	5
P80239	ahpC	20785			398	11	399	9
P80244	clpP	21725	606	22	864	42	495	25
P80643	acpA	8586					72	3
P80698	tig	47458			86	47	68	19
P80700	tsf	32448	64	4	1562	56	2854	103
P80859	gndA	51914	115	6	1147	48	830	39
P80860	pgi	50568	42	2	753	29	678	32
P80861	yjlD	41927			30	4	27	4
P80862	serC	40281	21	1	81	4	80	4
P80864	tpx	18318			184	7	24	3
P80865	sucD	31647			64	2	84	4
P80866	yurY	29070	252	10	1631	57	801	28
P80868	fusA	76740	2671	95	6478	227	5424	196
P80870	yugI	14274					58	2
P80871	ywrO	19999			132	7	62	3
P80872	yocK	18876			29	1	26	1
P80874	yhdN	37346					21	1
P80875	yceD	20738			74	1	44	3
P80879	dps	16583			667	37	75	4
P80880	trxB	34612			132	3	170	6
P80885	pyk	62249	571	22	2626	89	1220	57
P80886	sucC	41574	159	10	366	15	526	21
P81102	yodC	22383			151	5	104	3
P94356	yxkC	19392	52	3	26	3	24	2
P94357	yxkD	30770	53	3
P94358	aldY	52845			181	9
P94359	yxkF	35082	24	2
P94360	msmX	41397	274	10	124	5	172	8
P94361	yxkH	31560	26	7
P94366	cydC	62823	204	12	73	4
P94367	cydD	64526	202	8
P94377	katX	62382	63	3	725	50	186	16
P94383	ycgH	48814	35	3	32	1
P94389	ycgL	30910			53	3	47	1
P94391	ycgN	56560	466	18	1224	57	1267	62
P94392	ycgO	51168			19	1
P94393	ycgP	47985					26	1
P94400	yciC	45734			447	15	377	14
P94408	yclF	53272	86	3	20	1
P94409	yclG	63280			30	1
P94414	yclK	55067	61	2
P94422	ycnB	50822	22	1
P94424	nfrA2	27907			33	1	63	5
P94425	ycnE	10938					43	1
P94428	gabD	50459			83	3	43	1
P94431	ycnI	22156	85	4			44	1
P94434	ycnL	13308	54	2	46	2	33	1
P94443	padR	21266			25	2
P94446	coxA	22161	4659	124	1395	39	1827	44
P94459	ppsD	407869			19	4
P94462	defA	17821			20	1
P94463	fmt	34669			178	8	348	18
P94464	rsmB	50528	416	15	245	15	149	7
P94478	hflX	47666	149	6	205	10	184	12
P94479	ynbB	46428	18	1
P94490	xylR	42488	23	2
P94494	alr2	43791			25	1
P94504	yvrH	26834					33	1
P94507	uppP	30439	635	23	444	16	337	11
P94512	ysaA	29676			92	2	76	2
P94520	ysdB	15676	110	7	25	1
P94521	ysdC	39249	262	9	379	16	159	5
P94541	rnhC	34162			50	3	39	2
P94544	polX	64194			111	7	72	7
P94545	mutSB	87420	102	4	435	16	74	4
P94546	yshE	15060	62	1	65	1	65	1
P94548	fadR	21965	69	3	75	2	103	3
P94549	fadB	27708			358	12	141	9
P94550	etfB	28614			25	1
P94559	ysnB	19020			59	4	32	1
P94569	ysoA	38853			28	1	45	1
P94573	ywoC	21132			169	8	136	6
P94574	ywoD	48793	28	1
P94584	fabZ	15844	116	3	106	5	57	4
P94585	mscL	14271	288	5
P94592	ywpJ	31935			22	1	50	2
P94593	ywqA	106191	160	10	59	5
P96499	yvhJ	43185	210	6
P96574	mtlR	78973			44	2
P96575	ydaB	55903			164	6	221	11
P96579	ydaF	21240			257	12	67	1
P96583	topB	81996	317	14	382	17	206	15
P96589	ydaO	66899	222	15	96	7	26	1
P96596	ydbA	31283	176	7	18	2
P96604	ydbI	40104	72	2	56	1	52	1
P96605	ydbJ	34312	73	4	58	5	191	6
P96610	ydbO	31522	98	2
P96612	ddl	39334	75	3	122	4	114	4
P96613	murF	49806			116	3	53	2
P96614	cshA	55296	4079	140	5293	182	5491	202
P96615	ydbS	18168	51	2	26	1	47	3
P96616	ydbT	57020	145	6	37	7	122	6
P96619	ydcC	38170			143	4
P96622	ndoA	12970			20	1
P96642	yddE	96598	26	2
P96666	ydeI	23217	20	1	21	1	75	2
P96672	ydeO	31465	965	42	212	11	218	12
P96676	ydeS	22130	65	2	134	3	34	1
P96696	ydfR	25148	101	3
P96697	ydfS	27087	330	7	73	1
P96703	ydgE	18419					53	1
P96704	ydgF	51041	123	6			25	1
P96706	ydgH	95543	65	3	37	2
P96712	bmr3	55766	35	2
P96741	ywtE	31739			60	4	78	5
Q00777	proG	30298	64	1	56	3	37	1
Q01463	minC	25096					42	1
Q01464	minD	29559	69	2	387	17	186	6
Q01465	mreB	36008	424	16	627	24	1086	41
Q01466	mreC	32178	221	10
Q01620	jag	23148	40	1	102	3	50	1
Q01625	misCA	29616	1049	34	573	18	266	14
Q02115	lytR	34565	93	7	64	3	54	2
Q02169	maf	21396					51	2
Q03222	rho	48598	307	17	472	22	491	23
Q03522	murD	49734			73	2	93	3
Q03523	murE	54577	40	1	129	4	120	6
Q04385	ygxA	34432			28	1
Q04795	dapG	43092	52	1	71	2	133	6
Q04796	dapA	31022					19	1
Q04797	asd	37937			149	3	53	2
Q04805	ymxG	46137	53	3	245	15	287	16
Q05470	pksL	509001	32	6	35	6
Q05852	gtaB	33106	60	4	532	32	268	17
Q05865	folC	48306			63	1	35	3
Q05873	valS	101852	717	34	1000	45	529	33
Q06750	cysE	24185	57	2
Q06752	cysS	54045	59	1	733	26	422	21
Q06753	yacO	27548	45	4	160	9	216	8
Q06754	yacL	40946	187	6	37	1	53	3
Q06795	nusG	20113			106	7	73	3
Q06796	rplK	14979	33	1	132	3	432	16
Q06797	rplA	24973	353	10	2201	64	2841	98
Q07836	wapI	16533			125	2	82	1
Q07876	rsmH	35398	71	3	147	6	282	12
Q08311	cotY	18728	94	4	278	13	57	2
Q08312	cotZ	17093			34	1
Q08313	cotX	18989	59	2	353	29
Q08352	ald	39716			84	2
Q08432	patB	43047	68	3	148	4	191	7
Q45056	yneA	11880			18	1
Q45063	yneR	10883			19	1
Q45064	plsY	20953	121	3			20	2
Q45065	yneT	15037			54	1
Q45066	parC	91434	171	9	496	25	275	16
Q45068	alsT	50325	98	5	40	1
Q45477	ileS	105178	318	15	1884	84	858	45
Q45478	ylyA	14220			91	1
Q45479	lspA	17472	43	1	28	1
Q45480	ylyB	33819			57	2	51	3
Q45493	rnjA	61763	4286	162	1823	83	2314	104
Q45494	ykrA	28944			50	2	44	3
Q45495	defB	20700			31	2	40	1
Q45498	yktB	24658	246	7	179	8	402	14
Q45499	suhB	29798			138	4	38	1
Q45514	sapB	26090	76	3	61	2
Q45537	cotJB	10214			46	1
Q45538	cotJC	21739			184	10
Q45539	csbB	37876	162	7
Q45549	nrdR	18300			20	1
Q45585	sigW	21757			75	5	47	4
Q45588	rsiW	23497	65	1
Q45589	ybbP	30584	229	11	69	2	83	5
Q45593	yydI	23868			76	2	98	4
Q45597	fbp	74845	26	4	131	8	23	1
Q45598	yydD	69406	124	5	101	11	52	4
Q45600	yydB	56767			54	2
Q45601	rlmH	18062					24	1
Q45604	yycR	43376	45	1
Q45612	yycI	32631	190	7	19	1
Q45614	yycG	69990	373	11	74	3	60	5
Q59192	parE	72962	88	5	258	15	183	14
Q794W0	yycH	52183	212	10	98	3	55	3
Q795M6	yugH	42568	92	2	26	1
Q795M8	yugO	36727	141	5			25	1
Q795R8	ytfP	46327	354	14	160	10	202	13
Q796Q1	yitG	45763	996	69	557	38	390	28
Q796Y8	ygaF	18211			33	2	19	2
Q796Z1	ygaC	21297			41	2
Q797A7	yfnA	49159	44	1
Q797S1	ybbF	47741	195	5	154	6	73	3
Q7BVT7	yerC	12195			77	1
Q7WY60	mrpE	18482	49	3
Q7WY77	kipA	36733			45	1
Q99027	comP	89537	268	9	93	5	36	1
Q99171	tepA	27015	1059	36	989	42	566	33
Q9JMQ2	ppaX	24045			66	1
Q9K2S2	mrpA	89586	50	2			40	1
Q9KWU4	pyc	128141	3688	126	2941	110	1590	77

## Sheet: S1b
Table S1: Proteins identified in the Bacillus subtilis spore inner membrane fraction
b. Mascot search result details of Replicate 1
Protein hit number	Protein accession	Protein description	Protein score	Protein mass	Peptide score	Peptide sequence	Peptide variable modification
845	1::sw|C0H3S6|YWZG_BACSU	Putative DNA-binding protein YwzG OS=Bacillus subtilis (strain 168) GN=ywzG PE=4 SV=1	20	13118	20.39	MLNRELVK
141	1::sw|C0H3X3|YEZF_BACSU	Uncharacterized membrane protein YezF OS=Bacillus subtilis (strain 168) GN=yezF PE=4 SV=1	591	8554	89.64	PNISLINAVFR
141	1::sw|C0H3X3|YEZF_BACSU	Uncharacterized membrane protein YezF OS=Bacillus subtilis (strain 168) GN=yezF PE=4 SV=1	591	8554	96.46	PNISLINAVFR
141	1::sw|C0H3X3|YEZF_BACSU	Uncharacterized membrane protein YezF OS=Bacillus subtilis (strain 168) GN=yezF PE=4 SV=1	591	8554	85.41	PNISLINAVFR
141	1::sw|C0H3X3|YEZF_BACSU	Uncharacterized membrane protein YezF OS=Bacillus subtilis (strain 168) GN=yezF PE=4 SV=1	591	8554	48.87	IACGLTIMSAASAK
141	1::sw|C0H3X3|YEZF_BACSU	Uncharacterized membrane protein YezF OS=Bacillus subtilis (strain 168) GN=yezF PE=4 SV=1	591	8554	56.36	IACGLTIMSAASAK
141	1::sw|C0H3X3|YEZF_BACSU	Uncharacterized membrane protein YezF OS=Bacillus subtilis (strain 168) GN=yezF PE=4 SV=1	591	8554	66.19	IACGLTIMSAASAK
141	1::sw|C0H3X3|YEZF_BACSU	Uncharacterized membrane protein YezF OS=Bacillus subtilis (strain 168) GN=yezF PE=4 SV=1	591	8554	89.76	IACGLTIMSAASAK
141	1::sw|C0H3X3|YEZF_BACSU	Uncharacterized membrane protein YezF OS=Bacillus subtilis (strain 168) GN=yezF PE=4 SV=1	591	8554	71.84	IACGLTIMSAASAK
141	1::sw|C0H3X3|YEZF_BACSU	Uncharacterized membrane protein YezF OS=Bacillus subtilis (strain 168) GN=yezF PE=4 SV=1	591	8554	53.69	IACGLTIMSAASAK
141	1::sw|C0H3X3|YEZF_BACSU	Uncharacterized membrane protein YezF OS=Bacillus subtilis (strain 168) GN=yezF PE=4 SV=1	591	8554	47.11	IACGLTIMSAASAK
141	1::sw|C0H3X3|YEZF_BACSU	Uncharacterized membrane protein YezF OS=Bacillus subtilis (strain 168) GN=yezF PE=4 SV=1	591	8554	44.52	IACGLTIMSAASAK	Oxidation (M)
141	1::sw|C0H3X3|YEZF_BACSU	Uncharacterized membrane protein YezF OS=Bacillus subtilis (strain 168) GN=yezF PE=4 SV=1	591	8554	55.6	MHLFYIFMGAMK
141	1::sw|C0H3X3|YEZF_BACSU	Uncharacterized membrane protein YezF OS=Bacillus subtilis (strain 168) GN=yezF PE=4 SV=1	591	8554	18.24	MHLFYIFMGAMK
287	1::sw|C0H3X7|MPRF_BACSU	Phosphatidylglycerol lysyltransferase OS=Bacillus subtilis (strain 168) GN=mprF PE=1 SV=1	247	96317	31.09	LAAFLNEK
287	1::sw|C0H3X7|MPRF_BACSU	Phosphatidylglycerol lysyltransferase OS=Bacillus subtilis (strain 168) GN=mprF PE=1 SV=1	247	96317	36.86	LVVLGDPSGQR
287	1::sw|C0H3X7|MPRF_BACSU	Phosphatidylglycerol lysyltransferase OS=Bacillus subtilis (strain 168) GN=mprF PE=1 SV=1	247	96317	37.12	LVVLGDPSGQR
287	1::sw|C0H3X7|MPRF_BACSU	Phosphatidylglycerol lysyltransferase OS=Bacillus subtilis (strain 168) GN=mprF PE=1 SV=1	247	96317	43.31	LVVLGDPSGQR
287	1::sw|C0H3X7|MPRF_BACSU	Phosphatidylglycerol lysyltransferase OS=Bacillus subtilis (strain 168) GN=mprF PE=1 SV=1	247	96317	45.48	LVVLGDPSGQR
287	1::sw|C0H3X7|MPRF_BACSU	Phosphatidylglycerol lysyltransferase OS=Bacillus subtilis (strain 168) GN=mprF PE=1 SV=1	247	96317	45.24	LVVLGDPSGQR
287	1::sw|C0H3X7|MPRF_BACSU	Phosphatidylglycerol lysyltransferase OS=Bacillus subtilis (strain 168) GN=mprF PE=1 SV=1	247	96317	44.82	FAAVIFNNVR
287	1::sw|C0H3X7|MPRF_BACSU	Phosphatidylglycerol lysyltransferase OS=Bacillus subtilis (strain 168) GN=mprF PE=1 SV=1	247	96317	36.08	AGDEENADKVK
287	1::sw|C0H3X7|MPRF_BACSU	Phosphatidylglycerol lysyltransferase OS=Bacillus subtilis (strain 168) GN=mprF PE=1 SV=1	247	96317	24.19	AGDEENADKVK
287	1::sw|C0H3X7|MPRF_BACSU	Phosphatidylglycerol lysyltransferase OS=Bacillus subtilis (strain 168) GN=mprF PE=1 SV=1	247	96317	39.9	SLSVTMFLVTR
287	1::sw|C0H3X7|MPRF_BACSU	Phosphatidylglycerol lysyltransferase OS=Bacillus subtilis (strain 168) GN=mprF PE=1 SV=1	247	96317	58.01	GFSVLFYQIER
287	1::sw|C0H3X7|MPRF_BACSU	Phosphatidylglycerol lysyltransferase OS=Bacillus subtilis (strain 168) GN=mprF PE=1 SV=1	247	96317	33.9	GFSLGFFDPSYLQK
287	1::sw|C0H3X7|MPRF_BACSU	Phosphatidylglycerol lysyltransferase OS=Bacillus subtilis (strain 168) GN=mprF PE=1 SV=1	247	96317	25.1	EDMALYHDFGYNFFK
656	1::sw|C0H445|YPZH_BACSU	Uncharacterized protein YpzH OS=Bacillus subtilis (strain 168) GN=ypzH PE=4 SV=1	51	7203	51	NLEAILDGIAHR
189	1::sw|C0H461|YRZQ_BACSU	Uncharacterized protein YrzQ OS=Bacillus subtilis (strain 168) GN=yrzQ PE=4 SV=1	398	5039	32.35	MATQSDMLNNR
189	1::sw|C0H461|YRZQ_BACSU	Uncharacterized protein YrzQ OS=Bacillus subtilis (strain 168) GN=yrzQ PE=4 SV=1	398	5039	40.9	MATQSDMLNNR
189	1::sw|C0H461|YRZQ_BACSU	Uncharacterized protein YrzQ OS=Bacillus subtilis (strain 168) GN=yrzQ PE=4 SV=1	398	5039	46.91	MATQSDMLNNR
189	1::sw|C0H461|YRZQ_BACSU	Uncharacterized protein YrzQ OS=Bacillus subtilis (strain 168) GN=yrzQ PE=4 SV=1	398	5039	69.51	MATQSDMLNNR	Oxidation (M)
189	1::sw|C0H461|YRZQ_BACSU	Uncharacterized protein YrzQ OS=Bacillus subtilis (strain 168) GN=yrzQ PE=4 SV=1	398	5039	28.35	MATQSDMLNNR	Oxidation (M)
189	1::sw|C0H461|YRZQ_BACSU	Uncharacterized protein YrzQ OS=Bacillus subtilis (strain 168) GN=yrzQ PE=4 SV=1	398	5039	39.92	MATQSDMLNNR	2 Oxidation (M)
189	1::sw|C0H461|YRZQ_BACSU	Uncharacterized protein YrzQ OS=Bacillus subtilis (strain 168) GN=yrzQ PE=4 SV=1	398	5039	29.7	TMTSLLAMGAGALVYR
189	1::sw|C0H461|YRZQ_BACSU	Uncharacterized protein YrzQ OS=Bacillus subtilis (strain 168) GN=yrzQ PE=4 SV=1	398	5039	69.11	TMTSLLAMGAGALVYR
189	1::sw|C0H461|YRZQ_BACSU	Uncharacterized protein YrzQ OS=Bacillus subtilis (strain 168) GN=yrzQ PE=4 SV=1	398	5039	59.64	TMTSLLAMGAGALVYR
189	1::sw|C0H461|YRZQ_BACSU	Uncharacterized protein YrzQ OS=Bacillus subtilis (strain 168) GN=yrzQ PE=4 SV=1	398	5039	74.65	TMTSLLAMGAGALVYR
189	1::sw|C0H461|YRZQ_BACSU	Uncharacterized protein YrzQ OS=Bacillus subtilis (strain 168) GN=yrzQ PE=4 SV=1	398	5039	49.9	TMTSLLAMGAGALVYR
189	1::sw|C0H461|YRZQ_BACSU	Uncharacterized protein YrzQ OS=Bacillus subtilis (strain 168) GN=yrzQ PE=4 SV=1	398	5039	58.94	TMTSLLAMGAGALVYR
189	1::sw|C0H461|YRZQ_BACSU	Uncharacterized protein YrzQ OS=Bacillus subtilis (strain 168) GN=yrzQ PE=4 SV=1	398	5039	54.67	TMTSLLAMGAGALVYR	Oxidation (M)
500	1::sw|C0SP78|YDFM_BACSU	Uncharacterized transporter YdfM OS=Bacillus subtilis (strain 168) GN=ydfM PE=3 SV=1	95	32891	40.59	ISMELIR
500	1::sw|C0SP78|YDFM_BACSU	Uncharacterized transporter YdfM OS=Bacillus subtilis (strain 168) GN=ydfM PE=3 SV=1	95	32891	55.64	AVIFQCDQVK
500	1::sw|C0SP78|YDFM_BACSU	Uncharacterized transporter YdfM OS=Bacillus subtilis (strain 168) GN=ydfM PE=3 SV=1	95	32891	40.98	SVDPELIEEYK
49	1::sw|C0SP90|YTHA_BACSU	Putative cytochrome bd menaquinol oxidase subunit I OS=Bacillus subtilis (strain 168) GN=ythA PE=1 SV=1	1467	49238	27.51	DDHYAIMAK
49	1::sw|C0SP90|YTHA_BACSU	Putative cytochrome bd menaquinol oxidase subunit I OS=Bacillus subtilis (strain 168) GN=ythA PE=1 SV=1	1467	49238	34.59	DDHYAIMAK
49	1::sw|C0SP90|YTHA_BACSU	Putative cytochrome bd menaquinol oxidase subunit I OS=Bacillus subtilis (strain 168) GN=ythA PE=1 SV=1	1467	49238	34.56	DDHYAIMAK
49	1::sw|C0SP90|YTHA_BACSU	Putative cytochrome bd menaquinol oxidase subunit I OS=Bacillus subtilis (strain 168) GN=ythA PE=1 SV=1	1467	49238	27.53	DDHYAIMAK
49	1::sw|C0SP90|YTHA_BACSU	Putative cytochrome bd menaquinol oxidase subunit I OS=Bacillus subtilis (strain 168) GN=ythA PE=1 SV=1	1467	49238	90.65	LAGAEGLFETR
49	1::sw|C0SP90|YTHA_BACSU	Putative cytochrome bd menaquinol oxidase subunit I OS=Bacillus subtilis (strain 168) GN=ythA PE=1 SV=1	1467	49238	73.43	LAGAEGLFETR
49	1::sw|C0SP90|YTHA_BACSU	Putative cytochrome bd menaquinol oxidase subunit I OS=Bacillus subtilis (strain 168) GN=ythA PE=1 SV=1	1467	49238	93.81	LAGAEGLFETR
49	1::sw|C0SP90|YTHA_BACSU	Putative cytochrome bd menaquinol oxidase subunit I OS=Bacillus subtilis (strain 168) GN=ythA PE=1 SV=1	1467	49238	84.1	LAGAEGLFETR
49	1::sw|C0SP90|YTHA_BACSU	Putative cytochrome bd menaquinol oxidase subunit I OS=Bacillus subtilis (strain 168) GN=ythA PE=1 SV=1	1467	49238	86.47	LAGAEGLFETR
49	1::sw|C0SP90|YTHA_BACSU	Putative cytochrome bd menaquinol oxidase subunit I OS=Bacillus subtilis (strain 168) GN=ythA PE=1 SV=1	1467	49238	61.08	LAGAEGLFETR
49	1::sw|C0SP90|YTHA_BACSU	Putative cytochrome bd menaquinol oxidase subunit I OS=Bacillus subtilis (strain 168) GN=ythA PE=1 SV=1	1467	49238	40.13	LAGAEGLFETR
49	1::sw|C0SP90|YTHA_BACSU	Putative cytochrome bd menaquinol oxidase subunit I OS=Bacillus subtilis (strain 168) GN=ythA PE=1 SV=1	1467	49238	103.86	LAGAEGLFETR
49	1::sw|C0SP90|YTHA_BACSU	Putative cytochrome bd menaquinol oxidase subunit I OS=Bacillus subtilis (strain 168) GN=ythA PE=1 SV=1	1467	49238	47.8	LAGAEGLFETR
49	1::sw|C0SP90|YTHA_BACSU	Putative cytochrome bd menaquinol oxidase subunit I OS=Bacillus subtilis (strain 168) GN=ythA PE=1 SV=1	1467	49238	73.25	LAGAEGLFETR
49	1::sw|C0SP90|YTHA_BACSU	Putative cytochrome bd menaquinol oxidase subunit I OS=Bacillus subtilis (strain 168) GN=ythA PE=1 SV=1	1467	49238	44.47	TKDDHYAIMAK
49	1::sw|C0SP90|YTHA_BACSU	Putative cytochrome bd menaquinol oxidase subunit I OS=Bacillus subtilis (strain 168) GN=ythA PE=1 SV=1	1467	49238	23.7	TKDDHYAIMAK
49	1::sw|C0SP90|YTHA_BACSU	Putative cytochrome bd menaquinol oxidase subunit I OS=Bacillus subtilis (strain 168) GN=ythA PE=1 SV=1	1467	49238	32.07	HPVDEDLNTAES
49	1::sw|C0SP90|YTHA_BACSU	Putative cytochrome bd menaquinol oxidase subunit I OS=Bacillus subtilis (strain 168) GN=ythA PE=1 SV=1	1467	49238	25.3	HPVDEDLNTAES
49	1::sw|C0SP90|YTHA_BACSU	Putative cytochrome bd menaquinol oxidase subunit I OS=Bacillus subtilis (strain 168) GN=ythA PE=1 SV=1	1467	49238	75.38	HPVDEDLNTAES
49	1::sw|C0SP90|YTHA_BACSU	Putative cytochrome bd menaquinol oxidase subunit I OS=Bacillus subtilis (strain 168) GN=ythA PE=1 SV=1	1467	49238	59.27	HPVDEDLNTAES
49	1::sw|C0SP90|YTHA_BACSU	Putative cytochrome bd menaquinol oxidase subunit I OS=Bacillus subtilis (strain 168) GN=ythA PE=1 SV=1	1467	49238	37.91	HPVDEDLNTAES
49	1::sw|C0SP90|YTHA_BACSU	Putative cytochrome bd menaquinol oxidase subunit I OS=Bacillus subtilis (strain 168) GN=ythA PE=1 SV=1	1467	49238	57.7	KHPVDEDLNTAES
49	1::sw|C0SP90|YTHA_BACSU	Putative cytochrome bd menaquinol oxidase subunit I OS=Bacillus subtilis (strain 168) GN=ythA PE=1 SV=1	1467	49238	64.88	KHPVDEDLNTAES
49	1::sw|C0SP90|YTHA_BACSU	Putative cytochrome bd menaquinol oxidase subunit I OS=Bacillus subtilis (strain 168) GN=ythA PE=1 SV=1	1467	49238	62.9	KHPVDEDLNTAES
49	1::sw|C0SP90|YTHA_BACSU	Putative cytochrome bd menaquinol oxidase subunit I OS=Bacillus subtilis (strain 168) GN=ythA PE=1 SV=1	1467	49238	71	KHPVDEDLNTAES
49	1::sw|C0SP90|YTHA_BACSU	Putative cytochrome bd menaquinol oxidase subunit I OS=Bacillus subtilis (strain 168) GN=ythA PE=1 SV=1	1467	49238	28.75	KHPVDEDLNTAES
49	1::sw|C0SP90|YTHA_BACSU	Putative cytochrome bd menaquinol oxidase subunit I OS=Bacillus subtilis (strain 168) GN=ythA PE=1 SV=1	1467	49238	56.28	SHAPLAIGGFTDPNEEK
49	1::sw|C0SP90|YTHA_BACSU	Putative cytochrome bd menaquinol oxidase subunit I OS=Bacillus subtilis (strain 168) GN=ythA PE=1 SV=1	1467	49238	68.43	SHAPLAIGGFTDPNEEK
49	1::sw|C0SP90|YTHA_BACSU	Putative cytochrome bd menaquinol oxidase subunit I OS=Bacillus subtilis (strain 168) GN=ythA PE=1 SV=1	1467	49238	64.31	SHAPLAIGGFTDPNEEK
49	1::sw|C0SP90|YTHA_BACSU	Putative cytochrome bd menaquinol oxidase subunit I OS=Bacillus subtilis (strain 168) GN=ythA PE=1 SV=1	1467	49238	23.07	SHAPLAIGGFTDPNEEK
49	1::sw|C0SP90|YTHA_BACSU	Putative cytochrome bd menaquinol oxidase subunit I OS=Bacillus subtilis (strain 168) GN=ythA PE=1 SV=1	1467	49238	58.61	SHAPLAIGGFTDPNEEK
49	1::sw|C0SP90|YTHA_BACSU	Putative cytochrome bd menaquinol oxidase subunit I OS=Bacillus subtilis (strain 168) GN=ythA PE=1 SV=1	1467	49238	53.98	SHAPLAIGGFTDPNEEK
49	1::sw|C0SP90|YTHA_BACSU	Putative cytochrome bd menaquinol oxidase subunit I OS=Bacillus subtilis (strain 168) GN=ythA PE=1 SV=1	1467	49238	66.49	SHAPLAIGGFTDPNEEK
49	1::sw|C0SP90|YTHA_BACSU	Putative cytochrome bd menaquinol oxidase subunit I OS=Bacillus subtilis (strain 168) GN=ythA PE=1 SV=1	1467	49238	45.87	SHAPLAIGGFTDPNEEK
49	1::sw|C0SP90|YTHA_BACSU	Putative cytochrome bd menaquinol oxidase subunit I OS=Bacillus subtilis (strain 168) GN=ythA PE=1 SV=1	1467	49238	39.96	SHAPLAIGGFTDPNEEK
49	1::sw|C0SP90|YTHA_BACSU	Putative cytochrome bd menaquinol oxidase subunit I OS=Bacillus subtilis (strain 168) GN=ythA PE=1 SV=1	1467	49238	42.1	SHAPLAIGGFTDPNEEK
49	1::sw|C0SP90|YTHA_BACSU	Putative cytochrome bd menaquinol oxidase subunit I OS=Bacillus subtilis (strain 168) GN=ythA PE=1 SV=1	1467	49238	53.92	SHAPLAIGGFTDPNEEK
49	1::sw|C0SP90|YTHA_BACSU	Putative cytochrome bd menaquinol oxidase subunit I OS=Bacillus subtilis (strain 168) GN=ythA PE=1 SV=1	1467	49238	29.71	SHAPLAIGGFTDPNEEK
49	1::sw|C0SP90|YTHA_BACSU	Putative cytochrome bd menaquinol oxidase subunit I OS=Bacillus subtilis (strain 168) GN=ythA PE=1 SV=1	1467	49238	52.31	SHAPLAIGGFTDPNEEK
49	1::sw|C0SP90|YTHA_BACSU	Putative cytochrome bd menaquinol oxidase subunit I OS=Bacillus subtilis (strain 168) GN=ythA PE=1 SV=1	1467	49238	50.61	SHAPLAIGGFTDPNEEK
49	1::sw|C0SP90|YTHA_BACSU	Putative cytochrome bd menaquinol oxidase subunit I OS=Bacillus subtilis (strain 168) GN=ythA PE=1 SV=1	1467	49238	61.79	WAIEIPWALSFLAANR
49	1::sw|C0SP90|YTHA_BACSU	Putative cytochrome bd menaquinol oxidase subunit I OS=Bacillus subtilis (strain 168) GN=ythA PE=1 SV=1	1467	49238	56.41	WAIEIPWALSFLAANR
49	1::sw|C0SP90|YTHA_BACSU	Putative cytochrome bd menaquinol oxidase subunit I OS=Bacillus subtilis (strain 168) GN=ythA PE=1 SV=1	1467	49238	53.83	WAIEIPWALSFLAANR
49	1::sw|C0SP90|YTHA_BACSU	Putative cytochrome bd menaquinol oxidase subunit I OS=Bacillus subtilis (strain 168) GN=ythA PE=1 SV=1	1467	49238	25.46	WAIEIPWALSFLAANR
49	1::sw|C0SP90|YTHA_BACSU	Putative cytochrome bd menaquinol oxidase subunit I OS=Bacillus subtilis (strain 168) GN=ythA PE=1 SV=1	1467	49238	24.73	WAIEIPWALSFLAANR
49	1::sw|C0SP90|YTHA_BACSU	Putative cytochrome bd menaquinol oxidase subunit I OS=Bacillus subtilis (strain 168) GN=ythA PE=1 SV=1	1467	49238	46.15	SHAPLAIGGFTDPNEEKVK
456	1::sw|C0SP93|ACCD_BACSU	Acetyl-coenzyme A carboxylase carboxyl transferase subunit beta OS=Bacillus subtilis (strain 168) GN=accD PE=1 SV=1	116	32242	20.54	ITLAIEKAK
456	1::sw|C0SP93|ACCD_BACSU	Acetyl-coenzyme A carboxylase carboxyl transferase subunit beta OS=Bacillus subtilis (strain 168) GN=accD PE=1 SV=1	116	32242	39.11	YASVPSDQAK
456	1::sw|C0SP93|ACCD_BACSU	Acetyl-coenzyme A carboxylase carboxyl transferase subunit beta OS=Bacillus subtilis (strain 168) GN=accD PE=1 SV=1	116	32242	50.94	VPFIIFTASGGAR
456	1::sw|C0SP93|ACCD_BACSU	Acetyl-coenzyme A carboxylase carboxyl transferase subunit beta OS=Bacillus subtilis (strain 168) GN=accD PE=1 SV=1	116	32242	46.14	MQEGVLSLMQMAK
456	1::sw|C0SP93|ACCD_BACSU	Acetyl-coenzyme A carboxylase carboxyl transferase subunit beta OS=Bacillus subtilis (strain 168) GN=accD PE=1 SV=1	116	32242	37.32	LPEDFQTAEFLLK
280	1::sw|C0SP94|YHFQ_BACSU	Putative ABC transporter substrate-binding lipoprotein YhfQ OS=Bacillus subtilis (strain 168) GN=yhfQ PE=1 SV=1	255	35524	21.29	TNVPEHPK
280	1::sw|C0SP94|YHFQ_BACSU	Putative ABC transporter substrate-binding lipoprotein YhfQ OS=Bacillus subtilis (strain 168) GN=yhfQ PE=1 SV=1	255	35524	51.34	VAVTHDLGK
280	1::sw|C0SP94|YHFQ_BACSU	Putative ABC transporter substrate-binding lipoprotein YhfQ OS=Bacillus subtilis (strain 168) GN=yhfQ PE=1 SV=1	255	35524	26.65	LLTQVGYR
280	1::sw|C0SP94|YHFQ_BACSU	Putative ABC transporter substrate-binding lipoprotein YhfQ OS=Bacillus subtilis (strain 168) GN=yhfQ PE=1 SV=1	255	35524	42.31	LLTQVGYR
280	1::sw|C0SP94|YHFQ_BACSU	Putative ABC transporter substrate-binding lipoprotein YhfQ OS=Bacillus subtilis (strain 168) GN=yhfQ PE=1 SV=1	255	35524	35.81	KLTAHEEK
280	1::sw|C0SP94|YHFQ_BACSU	Putative ABC transporter substrate-binding lipoprotein YhfQ OS=Bacillus subtilis (strain 168) GN=yhfQ PE=1 SV=1	255	35524	41.87	KLTAHEEK
280	1::sw|C0SP94|YHFQ_BACSU	Putative ABC transporter substrate-binding lipoprotein YhfQ OS=Bacillus subtilis (strain 168) GN=yhfQ PE=1 SV=1	255	35524	55.29	MTLEQLLK
280	1::sw|C0SP94|YHFQ_BACSU	Putative ABC transporter substrate-binding lipoprotein YhfQ OS=Bacillus subtilis (strain 168) GN=yhfQ PE=1 SV=1	255	35524	33.05	DENFFTSR
280	1::sw|C0SP94|YHFQ_BACSU	Putative ABC transporter substrate-binding lipoprotein YhfQ OS=Bacillus subtilis (strain 168) GN=yhfQ PE=1 SV=1	255	35524	42.29	KIDGYTSVGTR
280	1::sw|C0SP94|YHFQ_BACSU	Putative ABC transporter substrate-binding lipoprotein YhfQ OS=Bacillus subtilis (strain 168) GN=yhfQ PE=1 SV=1	255	35524	65.1	TDPDVIILMTGK
280	1::sw|C0SP94|YHFQ_BACSU	Putative ABC transporter substrate-binding lipoprotein YhfQ OS=Bacillus subtilis (strain 168) GN=yhfQ PE=1 SV=1	255	35524	51.22	IASLKPDLIIADTTR
280	1::sw|C0SP94|YHFQ_BACSU	Putative ABC transporter substrate-binding lipoprotein YhfQ OS=Bacillus subtilis (strain 168) GN=yhfQ PE=1 SV=1	255	35524	35.58	IASLKPDLIIADTTR
544	1::sw|C0SP95|YCNJ_BACSU	Copper transport protein YcnJ OS=Bacillus subtilis (strain 168) GN=ycnJ PE=1 SV=1	80	59757	21.65	VTDHNGDPVK
544	1::sw|C0SP95|YCNJ_BACSU	Copper transport protein YcnJ OS=Bacillus subtilis (strain 168) GN=ycnJ PE=1 SV=1	80	59757	24.14	VTDHNGDPVK
544	1::sw|C0SP95|YCNJ_BACSU	Copper transport protein YcnJ OS=Bacillus subtilis (strain 168) GN=ycnJ PE=1 SV=1	80	59757	33.15	AFTGHAAVVEEK
544	1::sw|C0SP95|YCNJ_BACSU	Copper transport protein YcnJ OS=Bacillus subtilis (strain 168) GN=ycnJ PE=1 SV=1	80	59757	56.26	GVFQDQNLSINEK
544	1::sw|C0SP95|YCNJ_BACSU	Copper transport protein YcnJ OS=Bacillus subtilis (strain 168) GN=ycnJ PE=1 SV=1	80	59757	31.98	GVFQDQNLSINEK
174	1::sw|C0SP98|YKFD_BACSU	Putative oligopeptide transport ATP-binding protein YkfD OS=Bacillus subtilis (strain 168) GN=ykfD PE=3 SV=1	423	37546	27.68	MHFDAGK
174	1::sw|C0SP98|YKFD_BACSU	Putative oligopeptide transport ATP-binding protein YkfD OS=Bacillus subtilis (strain 168) GN=ykfD PE=3 SV=1	423	37546	40.01	FVACHLYR
174	1::sw|C0SP98|YKFD_BACSU	Putative oligopeptide transport ATP-binding protein YkfD OS=Bacillus subtilis (strain 168) GN=ykfD PE=3 SV=1	423	37546	22.49	FVACHLYR
174	1::sw|C0SP98|YKFD_BACSU	Putative oligopeptide transport ATP-binding protein YkfD OS=Bacillus subtilis (strain 168) GN=ykfD PE=3 SV=1	423	37546	40.11	GTNLHALSEK
174	1::sw|C0SP98|YKFD_BACSU	Putative oligopeptide transport ATP-binding protein YkfD OS=Bacillus subtilis (strain 168) GN=ykfD PE=3 SV=1	423	37546	35.15	AVDGVTFQIR
174	1::sw|C0SP98|YKFD_BACSU	Putative oligopeptide transport ATP-binding protein YkfD OS=Bacillus subtilis (strain 168) GN=ykfD PE=3 SV=1	423	37546	44.21	LPLLEVSQLK
174	1::sw|C0SP98|YKFD_BACSU	Putative oligopeptide transport ATP-binding protein YkfD OS=Bacillus subtilis (strain 168) GN=ykfD PE=3 SV=1	423	37546	33.46	LPLLEVSQLK
174	1::sw|C0SP98|YKFD_BACSU	Putative oligopeptide transport ATP-binding protein YkfD OS=Bacillus subtilis (strain 168) GN=ykfD PE=3 SV=1	423	37546	27.55	RLPLLEVSQLK
174	1::sw|C0SP98|YKFD_BACSU	Putative oligopeptide transport ATP-binding protein YkfD OS=Bacillus subtilis (strain 168) GN=ykfD PE=3 SV=1	423	37546	43.29	LYQPTEGSVTYR
174	1::sw|C0SP98|YKFD_BACSU	Putative oligopeptide transport ATP-binding protein YkfD OS=Bacillus subtilis (strain 168) GN=ykfD PE=3 SV=1	423	37546	45.6	LYQPTEGSVTYR
174	1::sw|C0SP98|YKFD_BACSU	Putative oligopeptide transport ATP-binding protein YkfD OS=Bacillus subtilis (strain 168) GN=ykfD PE=3 SV=1	423	37546	42.77	LYQPTEGSVTYR
174	1::sw|C0SP98|YKFD_BACSU	Putative oligopeptide transport ATP-binding protein YkfD OS=Bacillus subtilis (strain 168) GN=ykfD PE=3 SV=1	423	37546	51.11	EGETFGLVGESGCGK
174	1::sw|C0SP98|YKFD_BACSU	Putative oligopeptide transport ATP-binding protein YkfD OS=Bacillus subtilis (strain 168) GN=ykfD PE=3 SV=1	423	37546	47.05	EGETFGLVGESGCGK
174	1::sw|C0SP98|YKFD_BACSU	Putative oligopeptide transport ATP-binding protein YkfD OS=Bacillus subtilis (strain 168) GN=ykfD PE=3 SV=1	423	37546	69.02	LQMIFQDPYASLNPR
174	1::sw|C0SP98|YKFD_BACSU	Putative oligopeptide transport ATP-binding protein YkfD OS=Bacillus subtilis (strain 168) GN=ykfD PE=3 SV=1	423	37546	34.93	ALLSSIPIPDPELEDKR
174	1::sw|C0SP98|YKFD_BACSU	Putative oligopeptide transport ATP-binding protein YkfD OS=Bacillus subtilis (strain 168) GN=ykfD PE=3 SV=1	423	37546	32.49	ALLSSIPIPDPELEDKR
174	1::sw|C0SP98|YKFD_BACSU	Putative oligopeptide transport ATP-binding protein YkfD OS=Bacillus subtilis (strain 168) GN=ykfD PE=3 SV=1	423	37546	71.79	LLVVDELLEAVGLHPDFGSR
174	1::sw|C0SP98|YKFD_BACSU	Putative oligopeptide transport ATP-binding protein YkfD OS=Bacillus subtilis (strain 168) GN=ykfD PE=3 SV=1	423	37546	68.36	LLVVDELLEAVGLHPDFGSR
312	1::sw|C0SPB0|YTCI_BACSU	Uncharacterized acyl--CoA ligase YtcI OS=Bacillus subtilis (strain 168) GN=ytcI PE=3 SV=1	224	59573	26.58	IEHAEVK
312	1::sw|C0SPB0|YTCI_BACSU	Uncharacterized acyl--CoA ligase YtcI OS=Bacillus subtilis (strain 168) GN=ytcI PE=3 SV=1	224	59573	46.16	IEHAEVK
312	1::sw|C0SPB0|YTCI_BACSU	Uncharacterized acyl--CoA ligase YtcI OS=Bacillus subtilis (strain 168) GN=ytcI PE=3 SV=1	224	59573	26.94	IEHAEVK
312	1::sw|C0SPB0|YTCI_BACSU	Uncharacterized acyl--CoA ligase YtcI OS=Bacillus subtilis (strain 168) GN=ytcI PE=3 SV=1	224	59573	24.79	EVIDVFQK
312	1::sw|C0SPB0|YTCI_BACSU	Uncharacterized acyl--CoA ligase YtcI OS=Bacillus subtilis (strain 168) GN=ytcI PE=3 SV=1	224	59573	35.17	IGAALADLGFK
312	1::sw|C0SPB0|YTCI_BACSU	Uncharacterized acyl--CoA ligase YtcI OS=Bacillus subtilis (strain 168) GN=ytcI PE=3 SV=1	224	59573	50.47	IGAALADLGFK
312	1::sw|C0SPB0|YTCI_BACSU	Uncharacterized acyl--CoA ligase YtcI OS=Bacillus subtilis (strain 168) GN=ytcI PE=3 SV=1	224	59573	27.81	EIEFVESLPK
312	1::sw|C0SPB0|YTCI_BACSU	Uncharacterized acyl--CoA ligase YtcI OS=Bacillus subtilis (strain 168) GN=ytcI PE=3 SV=1	224	59573	22.75	ECAVVASPDEIR
312	1::sw|C0SPB0|YTCI_BACSU	Uncharacterized acyl--CoA ligase YtcI OS=Bacillus subtilis (strain 168) GN=ytcI PE=3 SV=1	224	59573	53.73	NLLSIEADGSQFK
312	1::sw|C0SPB0|YTCI_BACSU	Uncharacterized acyl--CoA ligase YtcI OS=Bacillus subtilis (strain 168) GN=ytcI PE=3 SV=1	224	59573	25.56	NLLSIEADGSQFK
312	1::sw|C0SPB0|YTCI_BACSU	Uncharacterized acyl--CoA ligase YtcI OS=Bacillus subtilis (strain 168) GN=ytcI PE=3 SV=1	224	59573	26.01	VLEAYAVYLAILK
312	1::sw|C0SPB0|YTCI_BACSU	Uncharacterized acyl--CoA ligase YtcI OS=Bacillus subtilis (strain 168) GN=ytcI PE=3 SV=1	224	59573	66.09	LITLSIGENDAGWK
312	1::sw|C0SPB0|YTCI_BACSU	Uncharacterized acyl--CoA ligase YtcI OS=Bacillus subtilis (strain 168) GN=ytcI PE=3 SV=1	224	59573	39.08	DGYGQTESTLLVGVLK
477	1::sw|C0SPB4|YHAQ_BACSU	Uncharacterized ABC transporter ATP-binding protein YhaQ OS=Bacillus subtilis (strain 168) GN=yhaQ PE=3 SV=1	105	33951	28.14	KVEELSK
477	1::sw|C0SPB4|YHAQ_BACSU	Uncharacterized ABC transporter ATP-binding protein YhaQ OS=Bacillus subtilis (strain 168) GN=yhaQ PE=3 SV=1	105	33951	37.9	FNITDYENK
477	1::sw|C0SPB4|YHAQ_BACSU	Uncharacterized ABC transporter ATP-binding protein YhaQ OS=Bacillus subtilis (strain 168) GN=yhaQ PE=3 SV=1	105	33951	40.89	NVTIHSDDDLR
477	1::sw|C0SPB4|YHAQ_BACSU	Uncharacterized ABC transporter ATP-binding protein YhaQ OS=Bacillus subtilis (strain 168) GN=yhaQ PE=3 SV=1	105	33951	65.26	NSGVSILFSSHR
516	1::sw|C0SPB9|YKON_BACSU	Uncharacterized glycosyltransferase YkoN OS=Bacillus subtilis (strain 168) GN=ykoN PE=3 SV=1	90	43778	20.95	WVQELSPGGK
516	1::sw|C0SPB9|YKON_BACSU	Uncharacterized glycosyltransferase YkoN OS=Bacillus subtilis (strain 168) GN=ykoN PE=3 SV=1	90	43778	65.3	LYEQATGIMTK
516	1::sw|C0SPB9|YKON_BACSU	Uncharacterized glycosyltransferase YkoN OS=Bacillus subtilis (strain 168) GN=ykoN PE=3 SV=1	90	43778	27.9	LYEQATGIMTK
516	1::sw|C0SPB9|YKON_BACSU	Uncharacterized glycosyltransferase YkoN OS=Bacillus subtilis (strain 168) GN=ykoN PE=3 SV=1	90	43778	36.32	PGGVTISECLQK
756	1::sw|O05227|MRPG_BACSU	Na(+)/H(+) antiporter subunit G OS=Bacillus subtilis (strain 168) GN=mrpG PE=1 SV=1	34	13731	24.23	AAYNSGVK
756	1::sw|O05227|MRPG_BACSU	Na(+)/H(+) antiporter subunit G OS=Bacillus subtilis (strain 168) GN=mrpG PE=1 SV=1	34	13731	32.86	SVQDDYNGIR
834	1::sw|O05229|MRPD_BACSU	Na(+)/H(+) antiporter subunit D OS=Bacillus subtilis (strain 168) GN=mrpD PE=1 SV=3	22	53442	22.2	GIQTLSLGGWK
459	1::sw|O05235|YUGF_BACSU	Uncharacterized hydrolase YugF OS=Bacillus subtilis (strain 168) GN=yugF PE=3 SV=1	114	31420	23.55	KVIPLLR
459	1::sw|O05235|YUGF_BACSU	Uncharacterized hydrolase YugF OS=Bacillus subtilis (strain 168) GN=yugF PE=3 SV=1	114	31420	27.36	MEAVSPIR
459	1::sw|O05235|YUGF_BACSU	Uncharacterized hydrolase YugF OS=Bacillus subtilis (strain 168) GN=yugF PE=3 SV=1	114	31420	23.02	NLLNVVHDK
459	1::sw|O05235|YUGF_BACSU	Uncharacterized hydrolase YugF OS=Bacillus subtilis (strain 168) GN=yugF PE=3 SV=1	114	31420	32.69	NLLNVVHDK
459	1::sw|O05235|YUGF_BACSU	Uncharacterized hydrolase YugF OS=Bacillus subtilis (strain 168) GN=yugF PE=3 SV=1	114	31420	37.42	VVLLCSSGYLK
459	1::sw|O05235|YUGF_BACSU	Uncharacterized hydrolase YugF OS=Bacillus subtilis (strain 168) GN=yugF PE=3 SV=1	114	31420	32.29	LVIGILEHLQVK
459	1::sw|O05235|YUGF_BACSU	Uncharacterized hydrolase YugF OS=Bacillus subtilis (strain 168) GN=yugF PE=3 SV=1	114	31420	58.24	LVIGILEHLQVK
459	1::sw|O05235|YUGF_BACSU	Uncharacterized hydrolase YugF OS=Bacillus subtilis (strain 168) GN=yugF PE=3 SV=1	114	31420	32.21	HREGDLEPEQLK
459	1::sw|O05235|YUGF_BACSU	Uncharacterized hydrolase YugF OS=Bacillus subtilis (strain 168) GN=yugF PE=3 SV=1	114	31420	18.33	MNKPALLIWGEEDR
459	1::sw|O05235|YUGF_BACSU	Uncharacterized hydrolase YugF OS=Bacillus subtilis (strain 168) GN=yugF PE=3 SV=1	114	31420	20.48	DKYDIIALDLPPFGQSEK
213	1::sw|O05239|YUGJ_BACSU	Probable NADH-dependent butanol dehydrogenase 1 OS=Bacillus subtilis (strain 168) GN=yugJ PE=3 SV=1	347	42877	23.6	TVIETAPK
213	1::sw|O05239|YUGJ_BACSU	Probable NADH-dependent butanol dehydrogenase 1 OS=Bacillus subtilis (strain 168) GN=yugJ PE=3 SV=1	347	42877	24.78	MCESLLR
213	1::sw|O05239|YUGJ_BACSU	Probable NADH-dependent butanol dehydrogenase 1 OS=Bacillus subtilis (strain 168) GN=yugJ PE=3 SV=1	347	42877	49.42	HTLSENPAR
213	1::sw|O05239|YUGJ_BACSU	Probable NADH-dependent butanol dehydrogenase 1 OS=Bacillus subtilis (strain 168) GN=yugJ PE=3 SV=1	347	42877	69.61	NVLLVYGGGSIK
213	1::sw|O05239|YUGJ_BACSU	Probable NADH-dependent butanol dehydrogenase 1 OS=Bacillus subtilis (strain 168) GN=yugJ PE=3 SV=1	347	42877	65.44	YDGDAWDIVTK
213	1::sw|O05239|YUGJ_BACSU	Probable NADH-dependent butanol dehydrogenase 1 OS=Bacillus subtilis (strain 168) GN=yugJ PE=3 SV=1	347	42877	41.87	SLNKEDVLSILK
213	1::sw|O05239|YUGJ_BACSU	Probable NADH-dependent butanol dehydrogenase 1 OS=Bacillus subtilis (strain 168) GN=yugJ PE=3 SV=1	347	42877	57.79	LINDLENYELR
213	1::sw|O05239|YUGJ_BACSU	Probable NADH-dependent butanol dehydrogenase 1 OS=Bacillus subtilis (strain 168) GN=yugJ PE=3 SV=1	347	42877	20.41	LSAFWTSLGAPNR
213	1::sw|O05239|YUGJ_BACSU	Probable NADH-dependent butanol dehydrogenase 1 OS=Bacillus subtilis (strain 168) GN=yugJ PE=3 SV=1	347	42877	58.8	MQNFTYWNPTK
213	1::sw|O05239|YUGJ_BACSU	Probable NADH-dependent butanol dehydrogenase 1 OS=Bacillus subtilis (strain 168) GN=yugJ PE=3 SV=1	347	42877	38.83	SGLYDQVIEQLNK
213	1::sw|O05239|YUGJ_BACSU	Probable NADH-dependent butanol dehydrogenase 1 OS=Bacillus subtilis (strain 168) GN=yugJ PE=3 SV=1	347	42877	41.29	FSILDPVNTFTVPK
213	1::sw|O05239|YUGJ_BACSU	Probable NADH-dependent butanol dehydrogenase 1 OS=Bacillus subtilis (strain 168) GN=yugJ PE=3 SV=1	347	42877	78.95	LADYDINDEQLDTIADK
213	1::sw|O05239|YUGJ_BACSU	Probable NADH-dependent butanol dehydrogenase 1 OS=Bacillus subtilis (strain 168) GN=yugJ PE=3 SV=1	347	42877	38.28	VFDVEEAGKTDEEIALEGIDK
488	1::sw|O05240|YUGK_BACSU	Probable NADH-dependent butanol dehydrogenase 2 OS=Bacillus subtilis (strain 168) GN=yugK PE=3 SV=1	100	43550	69.61	NVLLVYGGGSIK
488	1::sw|O05240|YUGK_BACSU	Probable NADH-dependent butanol dehydrogenase 2 OS=Bacillus subtilis (strain 168) GN=yugK PE=3 SV=1	100	43550	53.1	MCFAVLQTVIETAPK
47	1::sw|O05241|YUGS_BACSU	UPF0053 protein YugS OS=Bacillus subtilis (strain 168) GN=yugS PE=3 SV=2	1515	48985	18.4	ITYPFIK
47	1::sw|O05241|YUGS_BACSU	UPF0053 protein YugS OS=Bacillus subtilis (strain 168) GN=yugS PE=3 SV=2	1515	48985	24.25	LFGFHSVK
47	1::sw|O05241|YUGS_BACSU	UPF0053 protein YugS OS=Bacillus subtilis (strain 168) GN=yugS PE=3 SV=2	1515	48985	25.13	LFGFHSVK
47	1::sw|O05241|YUGS_BACSU	UPF0053 protein YugS OS=Bacillus subtilis (strain 168) GN=yugS PE=3 SV=2	1515	48985	41.51	IFEFDNR
47	1::sw|O05241|YUGS_BACSU	UPF0053 protein YugS OS=Bacillus subtilis (strain 168) GN=yugS PE=3 SV=2	1515	48985	37.97	IFEFDNR
47	1::sw|O05241|YUGS_BACSU	UPF0053 protein YugS OS=Bacillus subtilis (strain 168) GN=yugS PE=3 SV=2	1515	48985	37.9	IFEFDNR
47	1::sw|O05241|YUGS_BACSU	UPF0053 protein YugS OS=Bacillus subtilis (strain 168) GN=yugS PE=3 SV=2	1515	48985	36.79	IFEFDNR
47	1::sw|O05241|YUGS_BACSU	UPF0053 protein YugS OS=Bacillus subtilis (strain 168) GN=yugS PE=3 SV=2	1515	48985	20.56	PLIWFYK
47	1::sw|O05241|YUGS_BACSU	UPF0053 protein YugS OS=Bacillus subtilis (strain 168) GN=yugS PE=3 SV=2	1515	48985	45.05	AYFLGQPIK
47	1::sw|O05241|YUGS_BACSU	UPF0053 protein YugS OS=Bacillus subtilis (strain 168) GN=yugS PE=3 SV=2	1515	48985	43.51	AYFLGQPIK
47	1::sw|O05241|YUGS_BACSU	UPF0053 protein YugS OS=Bacillus subtilis (strain 168) GN=yugS PE=3 SV=2	1515	48985	42.98	AYFLGQPIK
47	1::sw|O05241|YUGS_BACSU	UPF0053 protein YugS OS=Bacillus subtilis (strain 168) GN=yugS PE=3 SV=2	1515	48985	25.23	GEINQSEFR
47	1::sw|O05241|YUGS_BACSU	UPF0053 protein YugS OS=Bacillus subtilis (strain 168) GN=yugS PE=3 SV=2	1515	48985	45.58	GEINQSEFR
47	1::sw|O05241|YUGS_BACSU	UPF0053 protein YugS OS=Bacillus subtilis (strain 168) GN=yugS PE=3 SV=2	1515	48985	41.69	GEINQSEFR
47	1::sw|O05241|YUGS_BACSU	UPF0053 protein YugS OS=Bacillus subtilis (strain 168) GN=yugS PE=3 SV=2	1515	48985	52.18	GEINQSEFR
47	1::sw|O05241|YUGS_BACSU	UPF0053 protein YugS OS=Bacillus subtilis (strain 168) GN=yugS PE=3 SV=2	1515	48985	45.62	GEINQSEFR
47	1::sw|O05241|YUGS_BACSU	UPF0053 protein YugS OS=Bacillus subtilis (strain 168) GN=yugS PE=3 SV=2	1515	48985	41.72	GEINQSEFR
47	1::sw|O05241|YUGS_BACSU	UPF0053 protein YugS OS=Bacillus subtilis (strain 168) GN=yugS PE=3 SV=2	1515	48985	36.69	GEINQSEFR
47	1::sw|O05241|YUGS_BACSU	UPF0053 protein YugS OS=Bacillus subtilis (strain 168) GN=yugS PE=3 SV=2	1515	48985	20.04	LILSESYEK
47	1::sw|O05241|YUGS_BACSU	UPF0053 protein YugS OS=Bacillus subtilis (strain 168) GN=yugS PE=3 SV=2	1515	48985	34.76	LILSESYEK
47	1::sw|O05241|YUGS_BACSU	UPF0053 protein YugS OS=Bacillus subtilis (strain 168) GN=yugS PE=3 SV=2	1515	48985	41.32	LILSESYEK
47	1::sw|O05241|YUGS_BACSU	UPF0053 protein YugS OS=Bacillus subtilis (strain 168) GN=yugS PE=3 SV=2	1515	48985	56.01	LILSESYEK
47	1::sw|O05241|YUGS_BACSU	UPF0053 protein YugS OS=Bacillus subtilis (strain 168) GN=yugS PE=3 SV=2	1515	48985	25.61	LILSESYEK
47	1::sw|O05241|YUGS_BACSU	UPF0053 protein YugS OS=Bacillus subtilis (strain 168) GN=yugS PE=3 SV=2	1515	48985	34.45	LILSESYEK
47	1::sw|O05241|YUGS_BACSU	UPF0053 protein YugS OS=Bacillus subtilis (strain 168) GN=yugS PE=3 SV=2	1515	48985	33.07	LILSESYEK
47	1::sw|O05241|YUGS_BACSU	UPF0053 protein YugS OS=Bacillus subtilis (strain 168) GN=yugS PE=3 SV=2	1515	48985	48.9	AEAVSLWIAK
47	1::sw|O05241|YUGS_BACSU	UPF0053 protein YugS OS=Bacillus subtilis (strain 168) GN=yugS PE=3 SV=2	1515	48985	24.15	ILDAEDHHIR
47	1::sw|O05241|YUGS_BACSU	UPF0053 protein YugS OS=Bacillus subtilis (strain 168) GN=yugS PE=3 SV=2	1515	48985	25.37	ILDAEDHHIR
47	1::sw|O05241|YUGS_BACSU	UPF0053 protein YugS OS=Bacillus subtilis (strain 168) GN=yugS PE=3 SV=2	1515	48985	62.23	ILDAEDHHIR
47	1::sw|O05241|YUGS_BACSU	UPF0053 protein YugS OS=Bacillus subtilis (strain 168) GN=yugS PE=3 SV=2	1515	48985	31.07	ILDAEDHHIR
47	1::sw|O05241|YUGS_BACSU	UPF0053 protein YugS OS=Bacillus subtilis (strain 168) GN=yugS PE=3 SV=2	1515	48985	33.49	ILDAEDHHIR
47	1::sw|O05241|YUGS_BACSU	UPF0053 protein YugS OS=Bacillus subtilis (strain 168) GN=yugS PE=3 SV=2	1515	48985	79.14	INQLIESGDSR
47	1::sw|O05241|YUGS_BACSU	UPF0053 protein YugS OS=Bacillus subtilis (strain 168) GN=yugS PE=3 SV=2	1515	48985	47.77	INQLIESGDSR
47	1::sw|O05241|YUGS_BACSU	UPF0053 protein YugS OS=Bacillus subtilis (strain 168) GN=yugS PE=3 SV=2	1515	48985	51.99	INQLIESGDSR
47	1::sw|O05241|YUGS_BACSU	UPF0053 protein YugS OS=Bacillus subtilis (strain 168) GN=yugS PE=3 SV=2	1515	48985	37.32	INQLIESGDSR
47	1::sw|O05241|YUGS_BACSU	UPF0053 protein YugS OS=Bacillus subtilis (strain 168) GN=yugS PE=3 SV=2	1515	48985	75.46	INQLIESGDSR
47	1::sw|O05241|YUGS_BACSU	UPF0053 protein YugS OS=Bacillus subtilis (strain 168) GN=yugS PE=3 SV=2	1515	48985	47.23	INQLIESGDSR
47	1::sw|O05241|YUGS_BACSU	UPF0053 protein YugS OS=Bacillus subtilis (strain 168) GN=yugS PE=3 SV=2	1515	48985	92.14	INQLIESGDSR
47	1::sw|O05241|YUGS_BACSU	UPF0053 protein YugS OS=Bacillus subtilis (strain 168) GN=yugS PE=3 SV=2	1515	48985	25.97	LNQIMRPVIR
47	1::sw|O05241|YUGS_BACSU	UPF0053 protein YugS OS=Bacillus subtilis (strain 168) GN=yugS PE=3 SV=2	1515	48985	18.82	LNQIMRPVIR
47	1::sw|O05241|YUGS_BACSU	UPF0053 protein YugS OS=Bacillus subtilis (strain 168) GN=yugS PE=3 SV=2	1515	48985	19.55	KGEHHYVMDGK
47	1::sw|O05241|YUGS_BACSU	UPF0053 protein YugS OS=Bacillus subtilis (strain 168) GN=yugS PE=3 SV=2	1515	48985	26.34	KGEHHYVMDGK
47	1::sw|O05241|YUGS_BACSU	UPF0053 protein YugS OS=Bacillus subtilis (strain 168) GN=yugS PE=3 SV=2	1515	48985	69.75	AGDVIHAEGCEFK
47	1::sw|O05241|YUGS_BACSU	UPF0053 protein YugS OS=Bacillus subtilis (strain 168) GN=yugS PE=3 SV=2	1515	48985	46.37	AGDVIHAEGCEFK
47	1::sw|O05241|YUGS_BACSU	UPF0053 protein YugS OS=Bacillus subtilis (strain 168) GN=yugS PE=3 SV=2	1515	48985	35.15	AGDVIHAEGCEFK
47	1::sw|O05241|YUGS_BACSU	UPF0053 protein YugS OS=Bacillus subtilis (strain 168) GN=yugS PE=3 SV=2	1515	48985	67.67	AGDVIHAEGCEFK
47	1::sw|O05241|YUGS_BACSU	UPF0053 protein YugS OS=Bacillus subtilis (strain 168) GN=yugS PE=3 SV=2	1515	48985	81.03	AGDVIHAEGCEFK
47	1::sw|O05241|YUGS_BACSU	UPF0053 protein YugS OS=Bacillus subtilis (strain 168) GN=yugS PE=3 SV=2	1515	48985	30.21	AGDVIHAEGCEFK
47	1::sw|O05241|YUGS_BACSU	UPF0053 protein YugS OS=Bacillus subtilis (strain 168) GN=yugS PE=3 SV=2	1515	48985	28.55	AGDVIHAEGCEFK
47	1::sw|O05241|YUGS_BACSU	UPF0053 protein YugS OS=Bacillus subtilis (strain 168) GN=yugS PE=3 SV=2	1515	48985	25.04	AGDVIHAEGCEFK
47	1::sw|O05241|YUGS_BACSU	UPF0053 protein YugS OS=Bacillus subtilis (strain 168) GN=yugS PE=3 SV=2	1515	48985	38.51	EHQVVISEEELR
47	1::sw|O05241|YUGS_BACSU	UPF0053 protein YugS OS=Bacillus subtilis (strain 168) GN=yugS PE=3 SV=2	1515	48985	43.6	EHQVVISEEELR
47	1::sw|O05241|YUGS_BACSU	UPF0053 protein YugS OS=Bacillus subtilis (strain 168) GN=yugS PE=3 SV=2	1515	48985	61.45	EHQVVISEEELR
47	1::sw|O05241|YUGS_BACSU	UPF0053 protein YugS OS=Bacillus subtilis (strain 168) GN=yugS PE=3 SV=2	1515	48985	43.97	EHQVVISEEELR
47	1::sw|O05241|YUGS_BACSU	UPF0053 protein YugS OS=Bacillus subtilis (strain 168) GN=yugS PE=3 SV=2	1515	48985	63.38	EHQVVISEEELR
47	1::sw|O05241|YUGS_BACSU	UPF0053 protein YugS OS=Bacillus subtilis (strain 168) GN=yugS PE=3 SV=2	1515	48985	49.68	DDKDHILGIINSK
47	1::sw|O05241|YUGS_BACSU	UPF0053 protein YugS OS=Bacillus subtilis (strain 168) GN=yugS PE=3 SV=2	1515	48985	53.21	EHQVVISEEELR
47	1::sw|O05241|YUGS_BACSU	UPF0053 protein YugS OS=Bacillus subtilis (strain 168) GN=yugS PE=3 SV=2	1515	48985	21.31	EHQVVISEEELR
47	1::sw|O05241|YUGS_BACSU	UPF0053 protein YugS OS=Bacillus subtilis (strain 168) GN=yugS PE=3 SV=2	1515	48985	54.41	EHQVVISEEELR
47	1::sw|O05241|YUGS_BACSU	UPF0053 protein YugS OS=Bacillus subtilis (strain 168) GN=yugS PE=3 SV=2	1515	48985	46.77	DDKDHILGIINSK
47	1::sw|O05241|YUGS_BACSU	UPF0053 protein YugS OS=Bacillus subtilis (strain 168) GN=yugS PE=3 SV=2	1515	48985	42.14	EHQVVISEEELR
47	1::sw|O05241|YUGS_BACSU	UPF0053 protein YugS OS=Bacillus subtilis (strain 168) GN=yugS PE=3 SV=2	1515	48985	21.56	DDKDHILGIINSK
47	1::sw|O05241|YUGS_BACSU	UPF0053 protein YugS OS=Bacillus subtilis (strain 168) GN=yugS PE=3 SV=2	1515	48985	41.24	EHQVVISEEELR
47	1::sw|O05241|YUGS_BACSU	UPF0053 protein YugS OS=Bacillus subtilis (strain 168) GN=yugS PE=3 SV=2	1515	48985	43.15	EHQVVISEEELR
47	1::sw|O05241|YUGS_BACSU	UPF0053 protein YugS OS=Bacillus subtilis (strain 168) GN=yugS PE=3 SV=2	1515	48985	26.77	DDKDHILGIINSK
47	1::sw|O05241|YUGS_BACSU	UPF0053 protein YugS OS=Bacillus subtilis (strain 168) GN=yugS PE=3 SV=2	1515	48985	28.77	EHQVVISEEELR
47	1::sw|O05241|YUGS_BACSU	UPF0053 protein YugS OS=Bacillus subtilis (strain 168) GN=yugS PE=3 SV=2	1515	48985	35.23	EHQVVISEEELR
47	1::sw|O05241|YUGS_BACSU	UPF0053 protein YugS OS=Bacillus subtilis (strain 168) GN=yugS PE=3 SV=2	1515	48985	18.85	DDKDHILGIINSK
47	1::sw|O05241|YUGS_BACSU	UPF0053 protein YugS OS=Bacillus subtilis (strain 168) GN=yugS PE=3 SV=2	1515	48985	50.74	VIESIPVQQLLIR
47	1::sw|O05241|YUGS_BACSU	UPF0053 protein YugS OS=Bacillus subtilis (strain 168) GN=yugS PE=3 SV=2	1515	48985	32.53	VIESIPVQQLLIR
47	1::sw|O05241|YUGS_BACSU	UPF0053 protein YugS OS=Bacillus subtilis (strain 168) GN=yugS PE=3 SV=2	1515	48985	39.06	VIESIPVQQLLIR
47	1::sw|O05241|YUGS_BACSU	UPF0053 protein YugS OS=Bacillus subtilis (strain 168) GN=yugS PE=3 SV=2	1515	48985	32.2	VIESIPVQQLLIR
47	1::sw|O05241|YUGS_BACSU	UPF0053 protein YugS OS=Bacillus subtilis (strain 168) GN=yugS PE=3 SV=2	1515	48985	22.37	DEYDQDETPHILK
47	1::sw|O05241|YUGS_BACSU	UPF0053 protein YugS OS=Bacillus subtilis (strain 168) GN=yugS PE=3 SV=2	1515	48985	85.29	TEIAVISLEQSLEEAIHHIINER
47	1::sw|O05241|YUGS_BACSU	UPF0053 protein YugS OS=Bacillus subtilis (strain 168) GN=yugS PE=3 SV=2	1515	48985	53.63	TEIAVISLEQSLEEAIHHIINER
101	1::sw|O05248|YUGP_BACSU	Putative membrane protease YugP OS=Bacillus subtilis (strain 168) GN=yugP PE=4 SV=1	814	24679	52.78	LSEPVYYGR
101	1::sw|O05248|YUGP_BACSU	Putative membrane protease YugP OS=Bacillus subtilis (strain 168) GN=yugP PE=4 SV=1	814	24679	66.98	LSEPVYYGR
101	1::sw|O05248|YUGP_BACSU	Putative membrane protease YugP OS=Bacillus subtilis (strain 168) GN=yugP PE=4 SV=1	814	24679	63.63	LSEPVYYGR
101	1::sw|O05248|YUGP_BACSU	Putative membrane protease YugP OS=Bacillus subtilis (strain 168) GN=yugP PE=4 SV=1	814	24679	36.84	LSEPVYYGR
101	1::sw|O05248|YUGP_BACSU	Putative membrane protease YugP OS=Bacillus subtilis (strain 168) GN=yugP PE=4 SV=1	814	24679	56.25	LSEPVYYGR
101	1::sw|O05248|YUGP_BACSU	Putative membrane protease YugP OS=Bacillus subtilis (strain 168) GN=yugP PE=4 SV=1	814	24679	55.03	LSEPVYYGR
101	1::sw|O05248|YUGP_BACSU	Putative membrane protease YugP OS=Bacillus subtilis (strain 168) GN=yugP PE=4 SV=1	814	24679	30.77	LSEPVYYGR
101	1::sw|O05248|YUGP_BACSU	Putative membrane protease YugP OS=Bacillus subtilis (strain 168) GN=yugP PE=4 SV=1	814	24679	68.21	LSEPVYYGR
101	1::sw|O05248|YUGP_BACSU	Putative membrane protease YugP OS=Bacillus subtilis (strain 168) GN=yugP PE=4 SV=1	814	24679	58.57	LSEPVYYGR
101	1::sw|O05248|YUGP_BACSU	Putative membrane protease YugP OS=Bacillus subtilis (strain 168) GN=yugP PE=4 SV=1	814	24679	51.75	LSEPVYYGR
101	1::sw|O05248|YUGP_BACSU	Putative membrane protease YugP OS=Bacillus subtilis (strain 168) GN=yugP PE=4 SV=1	814	24679	65.3	LSEPVYYGR
101	1::sw|O05248|YUGP_BACSU	Putative membrane protease YugP OS=Bacillus subtilis (strain 168) GN=yugP PE=4 SV=1	814	24679	54.55	LSEPVYYGR
101	1::sw|O05248|YUGP_BACSU	Putative membrane protease YugP OS=Bacillus subtilis (strain 168) GN=yugP PE=4 SV=1	814	24679	48.71	QIIVSEGFIR
101	1::sw|O05248|YUGP_BACSU	Putative membrane protease YugP OS=Bacillus subtilis (strain 168) GN=yugP PE=4 SV=1	814	24679	52.88	QIIVSEGFIR
101	1::sw|O05248|YUGP_BACSU	Putative membrane protease YugP OS=Bacillus subtilis (strain 168) GN=yugP PE=4 SV=1	814	24679	49.84	QIIVSEGFIR
101	1::sw|O05248|YUGP_BACSU	Putative membrane protease YugP OS=Bacillus subtilis (strain 168) GN=yugP PE=4 SV=1	814	24679	24.6	GTLTDHYDPTR
101	1::sw|O05248|YUGP_BACSU	Putative membrane protease YugP OS=Bacillus subtilis (strain 168) GN=yugP PE=4 SV=1	814	24679	51.88	GTLTDHYDPTR
101	1::sw|O05248|YUGP_BACSU	Putative membrane protease YugP OS=Bacillus subtilis (strain 168) GN=yugP PE=4 SV=1	814	24679	38.97	GTLTDHYDPTR
101	1::sw|O05248|YUGP_BACSU	Putative membrane protease YugP OS=Bacillus subtilis (strain 168) GN=yugP PE=4 SV=1	814	24679	56.44	GTLTDHYDPTR
101	1::sw|O05248|YUGP_BACSU	Putative membrane protease YugP OS=Bacillus subtilis (strain 168) GN=yugP PE=4 SV=1	814	24679	46.55	ILDINGLYDVPVEPVR
101	1::sw|O05248|YUGP_BACSU	Putative membrane protease YugP OS=Bacillus subtilis (strain 168) GN=yugP PE=4 SV=1	814	24679	26.98	ILDINGLYDVPVEPVR
101	1::sw|O05248|YUGP_BACSU	Putative membrane protease YugP OS=Bacillus subtilis (strain 168) GN=yugP PE=4 SV=1	814	24679	72.53	SISAISVASHEVGHALQHQESYGALVLR
101	1::sw|O05248|YUGP_BACSU	Putative membrane protease YugP OS=Bacillus subtilis (strain 168) GN=yugP PE=4 SV=1	814	24679	73.34	SISAISVASHEVGHALQHQESYGALVLR
101	1::sw|O05248|YUGP_BACSU	Putative membrane protease YugP OS=Bacillus subtilis (strain 168) GN=yugP PE=4 SV=1	814	24679	74.9	SISAISVASHEVGHALQHQESYGALVLR
101	1::sw|O05248|YUGP_BACSU	Putative membrane protease YugP OS=Bacillus subtilis (strain 168) GN=yugP PE=4 SV=1	814	24679	68.21	SISAISVASHEVGHALQHQESYGALVLR
248	1::sw|O05250|MALK_BACSU	Sensor histidine kinase MalK OS=Bacillus subtilis (strain 168) GN=malK PE=3 SV=1	301	59064	35.63	GQMILTSEK
248	1::sw|O05250|MALK_BACSU	Sensor histidine kinase MalK OS=Bacillus subtilis (strain 168) GN=malK PE=3 SV=1	301	59064	36.45	VFEQGYSTK
248	1::sw|O05250|MALK_BACSU	Sensor histidine kinase MalK OS=Bacillus subtilis (strain 168) GN=malK PE=3 SV=1	301	59064	28.56	HLAEQLSGVK
248	1::sw|O05250|MALK_BACSU	Sensor histidine kinase MalK OS=Bacillus subtilis (strain 168) GN=malK PE=3 SV=1	301	59064	32.53	AQSHEFMNK
248	1::sw|O05250|MALK_BACSU	Sensor histidine kinase MalK OS=Bacillus subtilis (strain 168) GN=malK PE=3 SV=1	301	59064	76	SSVLAGFLLGK
248	1::sw|O05250|MALK_BACSU	Sensor histidine kinase MalK OS=Bacillus subtilis (strain 168) GN=malK PE=3 SV=1	301	59064	68.23	GQTVGAIATFR
248	1::sw|O05250|MALK_BACSU	Sensor histidine kinase MalK OS=Bacillus subtilis (strain 168) GN=malK PE=3 SV=1	301	59064	47.56	EGILAVDEHGK
248	1::sw|O05250|MALK_BACSU	Sensor histidine kinase MalK OS=Bacillus subtilis (strain 168) GN=malK PE=3 SV=1	301	59064	29.83	EYDDLGDYIK
248	1::sw|O05250|MALK_BACSU	Sensor histidine kinase MalK OS=Bacillus subtilis (strain 168) GN=malK PE=3 SV=1	301	59064	85.89	GHVHISTASGTLGK
248	1::sw|O05250|MALK_BACSU	Sensor histidine kinase MalK OS=Bacillus subtilis (strain 168) GN=malK PE=3 SV=1	301	59064	25.77	GHVHISTASGTLGK
248	1::sw|O05250|MALK_BACSU	Sensor histidine kinase MalK OS=Bacillus subtilis (strain 168) GN=malK PE=3 SV=1	301	59064	41.95	GFGLYFTQQSIENLK
248	1::sw|O05250|MALK_BACSU	Sensor histidine kinase MalK OS=Bacillus subtilis (strain 168) GN=malK PE=3 SV=1	301	59064	26.52	INGLELVFNEVPIQLK
249	1::sw|O05252|YUFN_BACSU	Uncharacterized lipoprotein YufN OS=Bacillus subtilis (strain 168) GN=yufN PE=3 SV=2	297	38395	21.22	QNLSDDVIK
249	1::sw|O05252|YUFN_BACSU	Uncharacterized lipoprotein YufN OS=Bacillus subtilis (strain 168) GN=yufN PE=3 SV=2	297	38395	55.93	KVDTVVEDVTK
249	1::sw|O05252|YUFN_BACSU	Uncharacterized lipoprotein YufN OS=Bacillus subtilis (strain 168) GN=yufN PE=3 SV=2	297	38395	70.35	SDADYTTNLNK
249	1::sw|O05252|YUFN_BACSU	Uncharacterized lipoprotein YufN OS=Bacillus subtilis (strain 168) GN=yufN PE=3 SV=2	297	38395	66.05	IIDGLEIPATEK
249	1::sw|O05252|YUFN_BACSU	Uncharacterized lipoprotein YufN OS=Bacillus subtilis (strain 168) GN=yufN PE=3 SV=2	297	38395	53.96	IGFVGGMESELIK
249	1::sw|O05252|YUFN_BACSU	Uncharacterized lipoprotein YufN OS=Bacillus subtilis (strain 168) GN=yufN PE=3 SV=2	297	38395	57.76	SFNQSAWEGIQAFGK
249	1::sw|O05252|YUFN_BACSU	Uncharacterized lipoprotein YufN OS=Bacillus subtilis (strain 168) GN=yufN PE=3 SV=2	297	38395	55.05	EQEGSFLVGVAAALSSK
249	1::sw|O05252|YUFN_BACSU	Uncharacterized lipoprotein YufN OS=Bacillus subtilis (strain 168) GN=yufN PE=3 SV=2	297	38395	71.22	EQEGSFLVGVAAALSSK
314	1::sw|O05253|YUFO_BACSU	Uncharacterized ABC transporter ATP-binding protein YufO OS=Bacillus subtilis (strain 168) GN=yufO PE=3 SV=1	223	56322	18.4	VHINSPNK
314	1::sw|O05253|YUFO_BACSU	Uncharacterized ABC transporter ATP-binding protein YufO OS=Bacillus subtilis (strain 168) GN=yufO PE=3 SV=1	223	56322	42.06	SLITEYDVR
314	1::sw|O05253|YUFO_BACSU	Uncharacterized ABC transporter ATP-binding protein YufO OS=Bacillus subtilis (strain 168) GN=yufO PE=3 SV=1	223	56322	31.97	YGLQIHPEAK
314	1::sw|O05253|YUFO_BACSU	Uncharacterized ABC transporter ATP-binding protein YufO OS=Bacillus subtilis (strain 168) GN=yufO PE=3 SV=1	223	56322	59.46	AADISVGMQQR
314	1::sw|O05253|YUFO_BACSU	Uncharacterized ABC transporter ATP-binding protein YufO OS=Bacillus subtilis (strain 168) GN=yufO PE=3 SV=1	223	56322	28.02	KPYSALGVLHK
314	1::sw|O05253|YUFO_BACSU	Uncharacterized ABC transporter ATP-binding protein YufO OS=Bacillus subtilis (strain 168) GN=yufO PE=3 SV=1	223	56322	45.68	AGQEVQDISDR
314	1::sw|O05253|YUFO_BACSU	Uncharacterized ABC transporter ATP-binding protein YufO OS=Bacillus subtilis (strain 168) GN=yufO PE=3 SV=1	223	56322	41.08	GLDVGAIEFVHK
314	1::sw|O05253|YUFO_BACSU	Uncharacterized ABC transporter ATP-binding protein YufO OS=Bacillus subtilis (strain 168) GN=yufO PE=3 SV=1	223	56322	33.8	LKEIMEICDR
314	1::sw|O05253|YUFO_BACSU	Uncharacterized ABC transporter ATP-binding protein YufO OS=Bacillus subtilis (strain 168) GN=yufO PE=3 SV=1	223	56322	86.08	MEYVIEMLNIR
314	1::sw|O05253|YUFO_BACSU	Uncharacterized ABC transporter ATP-binding protein YufO OS=Bacillus subtilis (strain 168) GN=yufO PE=3 SV=1	223	56322	20.8	KITESGIGHIPQDR
314	1::sw|O05253|YUFO_BACSU	Uncharacterized ABC transporter ATP-binding protein YufO OS=Bacillus subtilis (strain 168) GN=yufO PE=3 SV=1	223	56322	29.86	GADILIFDEPTAVLTPHEIK
510	1::sw|O05254|YUFP_BACSU	Uncharacterized ABC transporter permease protein YufP OS=Bacillus subtilis (strain 168) GN=yufP PE=3 SV=1	92	36877	23.11	IHESASLR
510	1::sw|O05254|YUFP_BACSU	Uncharacterized ABC transporter permease protein YufP OS=Bacillus subtilis (strain 168) GN=yufP PE=3 SV=1	92	36877	89.93	SPFLEQITDYSR
582	1::sw|O05255|YUFQ_BACSU	Uncharacterized ABC transporter permease protein YufQ OS=Bacillus subtilis (strain 168) GN=yufQ PE=3 SV=1	66	33716	65.81	IPGLGDIPVLGK
582	1::sw|O05255|YUFQ_BACSU	Uncharacterized ABC transporter permease protein YufQ OS=Bacillus subtilis (strain 168) GN=yufQ PE=3 SV=1	66	33716	20.57	TKIPGLGDIPVLGK
734	1::sw|O05260|MRPC_BACSU	Na(+)/H(+) antiporter subunit C OS=Bacillus subtilis (strain 168) GN=mrpC PE=1 SV=2	36	12277	36.12	GAAPILSEHAK
10	1::sw|O05267|YUMB_BACSU	NADH dehydrogenase-like protein YumB OS=Bacillus subtilis (strain 168) GN=yumB PE=3 SV=1	4307	45133	41.95	DVINQSR
10	1::sw|O05267|YUMB_BACSU	NADH dehydrogenase-like protein YumB OS=Bacillus subtilis (strain 168) GN=yumB PE=3 SV=1	4307	45133	41.22	DVINQSR
10	1::sw|O05267|YUMB_BACSU	NADH dehydrogenase-like protein YumB OS=Bacillus subtilis (strain 168) GN=yumB PE=3 SV=1	4307	45133	34.29	DVINQSR
10	1::sw|O05267|YUMB_BACSU	NADH dehydrogenase-like protein YumB OS=Bacillus subtilis (strain 168) GN=yumB PE=3 SV=1	4307	45133	19.5	GTPASFMK
10	1::sw|O05267|YUMB_BACSU	NADH dehydrogenase-like protein YumB OS=Bacillus subtilis (strain 168) GN=yumB PE=3 SV=1	4307	45133	21.64	GTPASFMK
10	1::sw|O05267|YUMB_BACSU	NADH dehydrogenase-like protein YumB OS=Bacillus subtilis (strain 168) GN=yumB PE=3 SV=1	4307	45133	18.88	DEEPEQIK
10	1::sw|O05267|YUMB_BACSU	NADH dehydrogenase-like protein YumB OS=Bacillus subtilis (strain 168) GN=yumB PE=3 SV=1	4307	45133	65.88	VNFVQDTVK
10	1::sw|O05267|YUMB_BACSU	NADH dehydrogenase-like protein YumB OS=Bacillus subtilis (strain 168) GN=yumB PE=3 SV=1	4307	45133	65.47	VNFVQDTVK
10	1::sw|O05267|YUMB_BACSU	NADH dehydrogenase-like protein YumB OS=Bacillus subtilis (strain 168) GN=yumB PE=3 SV=1	4307	45133	46.05	VNFVQDTVK
10	1::sw|O05267|YUMB_BACSU	NADH dehydrogenase-like protein YumB OS=Bacillus subtilis (strain 168) GN=yumB PE=3 SV=1	4307	45133	63.52	VNFVQDTVK
10	1::sw|O05267|YUMB_BACSU	NADH dehydrogenase-like protein YumB OS=Bacillus subtilis (strain 168) GN=yumB PE=3 SV=1	4307	45133	53.76	VNFVQDTVK
10	1::sw|O05267|YUMB_BACSU	NADH dehydrogenase-like protein YumB OS=Bacillus subtilis (strain 168) GN=yumB PE=3 SV=1	4307	45133	46.76	VNFVQDTVK
10	1::sw|O05267|YUMB_BACSU	NADH dehydrogenase-like protein YumB OS=Bacillus subtilis (strain 168) GN=yumB PE=3 SV=1	4307	45133	52.85	VNFVQDTVK
10	1::sw|O05267|YUMB_BACSU	NADH dehydrogenase-like protein YumB OS=Bacillus subtilis (strain 168) GN=yumB PE=3 SV=1	4307	45133	54.83	VNFVQDTVK
10	1::sw|O05267|YUMB_BACSU	NADH dehydrogenase-like protein YumB OS=Bacillus subtilis (strain 168) GN=yumB PE=3 SV=1	4307	45133	44.33	VNFVQDTVK
10	1::sw|O05267|YUMB_BACSU	NADH dehydrogenase-like protein YumB OS=Bacillus subtilis (strain 168) GN=yumB PE=3 SV=1	4307	45133	47.2	VNFVQDTVK
10	1::sw|O05267|YUMB_BACSU	NADH dehydrogenase-like protein YumB OS=Bacillus subtilis (strain 168) GN=yumB PE=3 SV=1	4307	45133	47.56	VNFVQDTVK
10	1::sw|O05267|YUMB_BACSU	NADH dehydrogenase-like protein YumB OS=Bacillus subtilis (strain 168) GN=yumB PE=3 SV=1	4307	45133	36.95	VNFVQDTVK
10	1::sw|O05267|YUMB_BACSU	NADH dehydrogenase-like protein YumB OS=Bacillus subtilis (strain 168) GN=yumB PE=3 SV=1	4307	45133	30.65	VNFVQDTVK
10	1::sw|O05267|YUMB_BACSU	NADH dehydrogenase-like protein YumB OS=Bacillus subtilis (strain 168) GN=yumB PE=3 SV=1	4307	45133	46.27	VNFVQDTVK
10	1::sw|O05267|YUMB_BACSU	NADH dehydrogenase-like protein YumB OS=Bacillus subtilis (strain 168) GN=yumB PE=3 SV=1	4307	45133	28.31	VNFVQDTVK
10	1::sw|O05267|YUMB_BACSU	NADH dehydrogenase-like protein YumB OS=Bacillus subtilis (strain 168) GN=yumB PE=3 SV=1	4307	45133	38.17	VNFVQDTVK
10	1::sw|O05267|YUMB_BACSU	NADH dehydrogenase-like protein YumB OS=Bacillus subtilis (strain 168) GN=yumB PE=3 SV=1	4307	45133	49.67	VNFVQDTVK
10	1::sw|O05267|YUMB_BACSU	NADH dehydrogenase-like protein YumB OS=Bacillus subtilis (strain 168) GN=yumB PE=3 SV=1	4307	45133	32.07	VNFVQDTVK
10	1::sw|O05267|YUMB_BACSU	NADH dehydrogenase-like protein YumB OS=Bacillus subtilis (strain 168) GN=yumB PE=3 SV=1	4307	45133	38.16	KDEEPEQIK
10	1::sw|O05267|YUMB_BACSU	NADH dehydrogenase-like protein YumB OS=Bacillus subtilis (strain 168) GN=yumB PE=3 SV=1	4307	45133	46.77	KDEEPEQIK
10	1::sw|O05267|YUMB_BACSU	NADH dehydrogenase-like protein YumB OS=Bacillus subtilis (strain 168) GN=yumB PE=3 SV=1	4307	45133	39.62	KDEEPEQIK
10	1::sw|O05267|YUMB_BACSU	NADH dehydrogenase-like protein YumB OS=Bacillus subtilis (strain 168) GN=yumB PE=3 SV=1	4307	45133	46.78	KDEEPEQIK
10	1::sw|O05267|YUMB_BACSU	NADH dehydrogenase-like protein YumB OS=Bacillus subtilis (strain 168) GN=yumB PE=3 SV=1	4307	45133	29.33	KDEEPEQIK
10	1::sw|O05267|YUMB_BACSU	NADH dehydrogenase-like protein YumB OS=Bacillus subtilis (strain 168) GN=yumB PE=3 SV=1	4307	45133	56.35	KDEEPEQIK
10	1::sw|O05267|YUMB_BACSU	NADH dehydrogenase-like protein YumB OS=Bacillus subtilis (strain 168) GN=yumB PE=3 SV=1	4307	45133	36.4	KDEEPEQIK
10	1::sw|O05267|YUMB_BACSU	NADH dehydrogenase-like protein YumB OS=Bacillus subtilis (strain 168) GN=yumB PE=3 SV=1	4307	45133	50.89	KDEEPEQIK
10	1::sw|O05267|YUMB_BACSU	NADH dehydrogenase-like protein YumB OS=Bacillus subtilis (strain 168) GN=yumB PE=3 SV=1	4307	45133	34.54	KDEEPEQIK
10	1::sw|O05267|YUMB_BACSU	NADH dehydrogenase-like protein YumB OS=Bacillus subtilis (strain 168) GN=yumB PE=3 SV=1	4307	45133	31.85	KDEEPEQIK
10	1::sw|O05267|YUMB_BACSU	NADH dehydrogenase-like protein YumB OS=Bacillus subtilis (strain 168) GN=yumB PE=3 SV=1	4307	45133	29.99	KDEEPEQIK
10	1::sw|O05267|YUMB_BACSU	NADH dehydrogenase-like protein YumB OS=Bacillus subtilis (strain 168) GN=yumB PE=3 SV=1	4307	45133	82.98	SQTVVWAAGVR
10	1::sw|O05267|YUMB_BACSU	NADH dehydrogenase-like protein YumB OS=Bacillus subtilis (strain 168) GN=yumB PE=3 SV=1	4307	45133	91.67	SQTVVWAAGVR
10	1::sw|O05267|YUMB_BACSU	NADH dehydrogenase-like protein YumB OS=Bacillus subtilis (strain 168) GN=yumB PE=3 SV=1	4307	45133	68.14	SQTVVWAAGVR
10	1::sw|O05267|YUMB_BACSU	NADH dehydrogenase-like protein YumB OS=Bacillus subtilis (strain 168) GN=yumB PE=3 SV=1	4307	45133	56.81	SQTVVWAAGVR
10	1::sw|O05267|YUMB_BACSU	NADH dehydrogenase-like protein YumB OS=Bacillus subtilis (strain 168) GN=yumB PE=3 SV=1	4307	45133	44.99	SQTVVWAAGVR
10	1::sw|O05267|YUMB_BACSU	NADH dehydrogenase-like protein YumB OS=Bacillus subtilis (strain 168) GN=yumB PE=3 SV=1	4307	45133	69.79	SQTVVWAAGVR
10	1::sw|O05267|YUMB_BACSU	NADH dehydrogenase-like protein YumB OS=Bacillus subtilis (strain 168) GN=yumB PE=3 SV=1	4307	45133	103.07	SLFMIGGLGLTLK
10	1::sw|O05267|YUMB_BACSU	NADH dehydrogenase-like protein YumB OS=Bacillus subtilis (strain 168) GN=yumB PE=3 SV=1	4307	45133	45.44	SLFMIGGLGLTLK
10	1::sw|O05267|YUMB_BACSU	NADH dehydrogenase-like protein YumB OS=Bacillus subtilis (strain 168) GN=yumB PE=3 SV=1	4307	45133	90.76	SLFMIGGLGLTLK
10	1::sw|O05267|YUMB_BACSU	NADH dehydrogenase-like protein YumB OS=Bacillus subtilis (strain 168) GN=yumB PE=3 SV=1	4307	45133	70.5	SLFMIGGLGLTLK
10	1::sw|O05267|YUMB_BACSU	NADH dehydrogenase-like protein YumB OS=Bacillus subtilis (strain 168) GN=yumB PE=3 SV=1	4307	45133	72.58	SLFMIGGLGLTLK
10	1::sw|O05267|YUMB_BACSU	NADH dehydrogenase-like protein YumB OS=Bacillus subtilis (strain 168) GN=yumB PE=3 SV=1	4307	45133	83.08	SLFMIGGLGLTLK
10	1::sw|O05267|YUMB_BACSU	NADH dehydrogenase-like protein YumB OS=Bacillus subtilis (strain 168) GN=yumB PE=3 SV=1	4307	45133	50.02	SLFMIGGLGLTLK
10	1::sw|O05267|YUMB_BACSU	NADH dehydrogenase-like protein YumB OS=Bacillus subtilis (strain 168) GN=yumB PE=3 SV=1	4307	45133	26.29	GGELEEFKPDIK
10	1::sw|O05267|YUMB_BACSU	NADH dehydrogenase-like protein YumB OS=Bacillus subtilis (strain 168) GN=yumB PE=3 SV=1	4307	45133	41.03	GGELEEFKPDIK
10	1::sw|O05267|YUMB_BACSU	NADH dehydrogenase-like protein YumB OS=Bacillus subtilis (strain 168) GN=yumB PE=3 SV=1	4307	45133	60.26	GGELEEFKPDIK
10	1::sw|O05267|YUMB_BACSU	NADH dehydrogenase-like protein YumB OS=Bacillus subtilis (strain 168) GN=yumB PE=3 SV=1	4307	45133	33.66	GGELEEFKPDIK
10	1::sw|O05267|YUMB_BACSU	NADH dehydrogenase-like protein YumB OS=Bacillus subtilis (strain 168) GN=yumB PE=3 SV=1	4307	45133	48.77	GGELEEFKPDIK
10	1::sw|O05267|YUMB_BACSU	NADH dehydrogenase-like protein YumB OS=Bacillus subtilis (strain 168) GN=yumB PE=3 SV=1	4307	45133	39.26	GGELEEFKPDIK
10	1::sw|O05267|YUMB_BACSU	NADH dehydrogenase-like protein YumB OS=Bacillus subtilis (strain 168) GN=yumB PE=3 SV=1	4307	45133	33.95	GGELEEFKPDIK
10	1::sw|O05267|YUMB_BACSU	NADH dehydrogenase-like protein YumB OS=Bacillus subtilis (strain 168) GN=yumB PE=3 SV=1	4307	45133	59.82	GGELEEFKPDIK
10	1::sw|O05267|YUMB_BACSU	NADH dehydrogenase-like protein YumB OS=Bacillus subtilis (strain 168) GN=yumB PE=3 SV=1	4307	45133	21.68	GGELEEFKPDIK
10	1::sw|O05267|YUMB_BACSU	NADH dehydrogenase-like protein YumB OS=Bacillus subtilis (strain 168) GN=yumB PE=3 SV=1	4307	45133	32.05	GGELEEFKPDIK
10	1::sw|O05267|YUMB_BACSU	NADH dehydrogenase-like protein YumB OS=Bacillus subtilis (strain 168) GN=yumB PE=3 SV=1	4307	45133	42.33	GGELEEFKPDIK
10	1::sw|O05267|YUMB_BACSU	NADH dehydrogenase-like protein YumB OS=Bacillus subtilis (strain 168) GN=yumB PE=3 SV=1	4307	45133	32.59	GGELEEFKPDIK
10	1::sw|O05267|YUMB_BACSU	NADH dehydrogenase-like protein YumB OS=Bacillus subtilis (strain 168) GN=yumB PE=3 SV=1	4307	45133	23.73	GGELEEFKPDIK
10	1::sw|O05267|YUMB_BACSU	NADH dehydrogenase-like protein YumB OS=Bacillus subtilis (strain 168) GN=yumB PE=3 SV=1	4307	45133	25.69	SLFMIGGLGLTLK	Oxidation (M)
10	1::sw|O05267|YUMB_BACSU	NADH dehydrogenase-like protein YumB OS=Bacillus subtilis (strain 168) GN=yumB PE=3 SV=1	4307	45133	30.91	SLFMIGGLGLTLK	Oxidation (M)
10	1::sw|O05267|YUMB_BACSU	NADH dehydrogenase-like protein YumB OS=Bacillus subtilis (strain 168) GN=yumB PE=3 SV=1	4307	45133	44.69	SLFMIGGLGLTLK	Oxidation (M)
10	1::sw|O05267|YUMB_BACSU	NADH dehydrogenase-like protein YumB OS=Bacillus subtilis (strain 168) GN=yumB PE=3 SV=1	4307	45133	25.75	SLFMIGGLGLTLK	Oxidation (M)
10	1::sw|O05267|YUMB_BACSU	NADH dehydrogenase-like protein YumB OS=Bacillus subtilis (strain 168) GN=yumB PE=3 SV=1	4307	45133	83.71	SLFMIGGLGLTLK	Oxidation (M)
10	1::sw|O05267|YUMB_BACSU	NADH dehydrogenase-like protein YumB OS=Bacillus subtilis (strain 168) GN=yumB PE=3 SV=1	4307	45133	48.59	SLFMIGGLGLTLKK
10	1::sw|O05267|YUMB_BACSU	NADH dehydrogenase-like protein YumB OS=Bacillus subtilis (strain 168) GN=yumB PE=3 SV=1	4307	45133	39.75	EYAFPIANINTSR
10	1::sw|O05267|YUMB_BACSU	NADH dehydrogenase-like protein YumB OS=Bacillus subtilis (strain 168) GN=yumB PE=3 SV=1	4307	45133	34.29	EYAFPIANINTSR
10	1::sw|O05267|YUMB_BACSU	NADH dehydrogenase-like protein YumB OS=Bacillus subtilis (strain 168) GN=yumB PE=3 SV=1	4307	45133	69.12	EYAFPIANINTSR
10	1::sw|O05267|YUMB_BACSU	NADH dehydrogenase-like protein YumB OS=Bacillus subtilis (strain 168) GN=yumB PE=3 SV=1	4307	45133	41.23	EYAFPIANINTSR
10	1::sw|O05267|YUMB_BACSU	NADH dehydrogenase-like protein YumB OS=Bacillus subtilis (strain 168) GN=yumB PE=3 SV=1	4307	45133	54.35	EYAFPIANINTSR
10	1::sw|O05267|YUMB_BACSU	NADH dehydrogenase-like protein YumB OS=Bacillus subtilis (strain 168) GN=yumB PE=3 SV=1	4307	45133	35.55	EYAFPIANINTSR
10	1::sw|O05267|YUMB_BACSU	NADH dehydrogenase-like protein YumB OS=Bacillus subtilis (strain 168) GN=yumB PE=3 SV=1	4307	45133	56.44	EYAFPIANINTSR
10	1::sw|O05267|YUMB_BACSU	NADH dehydrogenase-like protein YumB OS=Bacillus subtilis (strain 168) GN=yumB PE=3 SV=1	4307	45133	64.53	EYAFPIANINTSR
10	1::sw|O05267|YUMB_BACSU	NADH dehydrogenase-like protein YumB OS=Bacillus subtilis (strain 168) GN=yumB PE=3 SV=1	4307	45133	66.32	EYAFPIANINTSR
10	1::sw|O05267|YUMB_BACSU	NADH dehydrogenase-like protein YumB OS=Bacillus subtilis (strain 168) GN=yumB PE=3 SV=1	4307	45133	72.88	EYAFPIANINTSR
10	1::sw|O05267|YUMB_BACSU	NADH dehydrogenase-like protein YumB OS=Bacillus subtilis (strain 168) GN=yumB PE=3 SV=1	4307	45133	60.44	IGTAVQECTPEGVR
10	1::sw|O05267|YUMB_BACSU	NADH dehydrogenase-like protein YumB OS=Bacillus subtilis (strain 168) GN=yumB PE=3 SV=1	4307	45133	55.74	IGTAVQECTPEGVR
10	1::sw|O05267|YUMB_BACSU	NADH dehydrogenase-like protein YumB OS=Bacillus subtilis (strain 168) GN=yumB PE=3 SV=1	4307	45133	73.4	IGTAVQECTPEGVR
10	1::sw|O05267|YUMB_BACSU	NADH dehydrogenase-like protein YumB OS=Bacillus subtilis (strain 168) GN=yumB PE=3 SV=1	4307	45133	62.09	IGTAVQECTPEGVR
10	1::sw|O05267|YUMB_BACSU	NADH dehydrogenase-like protein YumB OS=Bacillus subtilis (strain 168) GN=yumB PE=3 SV=1	4307	45133	41.29	IGTAVQECTPEGVR
10	1::sw|O05267|YUMB_BACSU	NADH dehydrogenase-like protein YumB OS=Bacillus subtilis (strain 168) GN=yumB PE=3 SV=1	4307	45133	40.54	IGTAVQECTPEGVR
10	1::sw|O05267|YUMB_BACSU	NADH dehydrogenase-like protein YumB OS=Bacillus subtilis (strain 168) GN=yumB PE=3 SV=1	4307	45133	73.02	IGTAVQECTPEGVR
10	1::sw|O05267|YUMB_BACSU	NADH dehydrogenase-like protein YumB OS=Bacillus subtilis (strain 168) GN=yumB PE=3 SV=1	4307	45133	72.79	IGTAVQECTPEGVR
10	1::sw|O05267|YUMB_BACSU	NADH dehydrogenase-like protein YumB OS=Bacillus subtilis (strain 168) GN=yumB PE=3 SV=1	4307	45133	72.8	IGTAVQECTPEGVR
10	1::sw|O05267|YUMB_BACSU	NADH dehydrogenase-like protein YumB OS=Bacillus subtilis (strain 168) GN=yumB PE=3 SV=1	4307	45133	75.2	IGTAVQECTPEGVR
10	1::sw|O05267|YUMB_BACSU	NADH dehydrogenase-like protein YumB OS=Bacillus subtilis (strain 168) GN=yumB PE=3 SV=1	4307	45133	73.27	IGTAVQECTPEGVR
10	1::sw|O05267|YUMB_BACSU	NADH dehydrogenase-like protein YumB OS=Bacillus subtilis (strain 168) GN=yumB PE=3 SV=1	4307	45133	56.66	IGTAVQECTPEGVR
10	1::sw|O05267|YUMB_BACSU	NADH dehydrogenase-like protein YumB OS=Bacillus subtilis (strain 168) GN=yumB PE=3 SV=1	4307	45133	47.17	IGTAVQECTPEGVR
10	1::sw|O05267|YUMB_BACSU	NADH dehydrogenase-like protein YumB OS=Bacillus subtilis (strain 168) GN=yumB PE=3 SV=1	4307	45133	72.66	IGTAVQECTPEGVR
10	1::sw|O05267|YUMB_BACSU	NADH dehydrogenase-like protein YumB OS=Bacillus subtilis (strain 168) GN=yumB PE=3 SV=1	4307	45133	73.51	IGTAVQECTPEGVR
10	1::sw|O05267|YUMB_BACSU	NADH dehydrogenase-like protein YumB OS=Bacillus subtilis (strain 168) GN=yumB PE=3 SV=1	4307	45133	84.92	YVGPNDADITLVNK
10	1::sw|O05267|YUMB_BACSU	NADH dehydrogenase-like protein YumB OS=Bacillus subtilis (strain 168) GN=yumB PE=3 SV=1	4307	45133	62.43	YVGPNDADITLVNK
10	1::sw|O05267|YUMB_BACSU	NADH dehydrogenase-like protein YumB OS=Bacillus subtilis (strain 168) GN=yumB PE=3 SV=1	4307	45133	112.47	YVGPNDADITLVNK
10	1::sw|O05267|YUMB_BACSU	NADH dehydrogenase-like protein YumB OS=Bacillus subtilis (strain 168) GN=yumB PE=3 SV=1	4307	45133	78	YVGPNDADITLVNK
10	1::sw|O05267|YUMB_BACSU	NADH dehydrogenase-like protein YumB OS=Bacillus subtilis (strain 168) GN=yumB PE=3 SV=1	4307	45133	82.53	YVGPNDADITLVNK
10	1::sw|O05267|YUMB_BACSU	NADH dehydrogenase-like protein YumB OS=Bacillus subtilis (strain 168) GN=yumB PE=3 SV=1	4307	45133	105.42	YVGPNDADITLVNK
10	1::sw|O05267|YUMB_BACSU	NADH dehydrogenase-like protein YumB OS=Bacillus subtilis (strain 168) GN=yumB PE=3 SV=1	4307	45133	77.8	YVGPNDADITLVNK
10	1::sw|O05267|YUMB_BACSU	NADH dehydrogenase-like protein YumB OS=Bacillus subtilis (strain 168) GN=yumB PE=3 SV=1	4307	45133	79.74	GHPIVEEAGFENMR
10	1::sw|O05267|YUMB_BACSU	NADH dehydrogenase-like protein YumB OS=Bacillus subtilis (strain 168) GN=yumB PE=3 SV=1	4307	45133	68.87	GHPIVEEAGFENMR
10	1::sw|O05267|YUMB_BACSU	NADH dehydrogenase-like protein YumB OS=Bacillus subtilis (strain 168) GN=yumB PE=3 SV=1	4307	45133	96.41	GHPIVEEAGFENMR
10	1::sw|O05267|YUMB_BACSU	NADH dehydrogenase-like protein YumB OS=Bacillus subtilis (strain 168) GN=yumB PE=3 SV=1	4307	45133	48.28	GHPIVEEAGFENMR
10	1::sw|O05267|YUMB_BACSU	NADH dehydrogenase-like protein YumB OS=Bacillus subtilis (strain 168) GN=yumB PE=3 SV=1	4307	45133	46.87	GHPIVEEAGFENMR
10	1::sw|O05267|YUMB_BACSU	NADH dehydrogenase-like protein YumB OS=Bacillus subtilis (strain 168) GN=yumB PE=3 SV=1	4307	45133	96.47	GHPIVEEAGFENMR
10	1::sw|O05267|YUMB_BACSU	NADH dehydrogenase-like protein YumB OS=Bacillus subtilis (strain 168) GN=yumB PE=3 SV=1	4307	45133	40.57	GHPIVEEAGFENMR
10	1::sw|O05267|YUMB_BACSU	NADH dehydrogenase-like protein YumB OS=Bacillus subtilis (strain 168) GN=yumB PE=3 SV=1	4307	45133	24.74	GHPIVEEAGFENMR
10	1::sw|O05267|YUMB_BACSU	NADH dehydrogenase-like protein YumB OS=Bacillus subtilis (strain 168) GN=yumB PE=3 SV=1	4307	45133	24.65	GHPIVEEAGFENMR
10	1::sw|O05267|YUMB_BACSU	NADH dehydrogenase-like protein YumB OS=Bacillus subtilis (strain 168) GN=yumB PE=3 SV=1	4307	45133	41.39	GHPIVEEAGFENMR
10	1::sw|O05267|YUMB_BACSU	NADH dehydrogenase-like protein YumB OS=Bacillus subtilis (strain 168) GN=yumB PE=3 SV=1	4307	45133	35.57	GHPIVEEAGFENMR	Oxidation (M)
10	1::sw|O05267|YUMB_BACSU	NADH dehydrogenase-like protein YumB OS=Bacillus subtilis (strain 168) GN=yumB PE=3 SV=1	4307	45133	24.88	IVILGAGYGGLMTVTR
10	1::sw|O05267|YUMB_BACSU	NADH dehydrogenase-like protein YumB OS=Bacillus subtilis (strain 168) GN=yumB PE=3 SV=1	4307	45133	87.8	IVILGAGYGGLMTVTR
10	1::sw|O05267|YUMB_BACSU	NADH dehydrogenase-like protein YumB OS=Bacillus subtilis (strain 168) GN=yumB PE=3 SV=1	4307	45133	28.14	IVILGAGYGGLMTVTR
10	1::sw|O05267|YUMB_BACSU	NADH dehydrogenase-like protein YumB OS=Bacillus subtilis (strain 168) GN=yumB PE=3 SV=1	4307	45133	93.75	IVILGAGYGGLMTVTR
10	1::sw|O05267|YUMB_BACSU	NADH dehydrogenase-like protein YumB OS=Bacillus subtilis (strain 168) GN=yumB PE=3 SV=1	4307	45133	86.69	IVILGAGYGGLMTVTR
10	1::sw|O05267|YUMB_BACSU	NADH dehydrogenase-like protein YumB OS=Bacillus subtilis (strain 168) GN=yumB PE=3 SV=1	4307	45133	104.09	IVILGAGYGGLMTVTR
10	1::sw|O05267|YUMB_BACSU	NADH dehydrogenase-like protein YumB OS=Bacillus subtilis (strain 168) GN=yumB PE=3 SV=1	4307	45133	61.69	IVILGAGYGGLMTVTR
10	1::sw|O05267|YUMB_BACSU	NADH dehydrogenase-like protein YumB OS=Bacillus subtilis (strain 168) GN=yumB PE=3 SV=1	4307	45133	103.76	IVILGAGYGGLMTVTR
10	1::sw|O05267|YUMB_BACSU	NADH dehydrogenase-like protein YumB OS=Bacillus subtilis (strain 168) GN=yumB PE=3 SV=1	4307	45133	60.26	IVILGAGYGGLMTVTR
10	1::sw|O05267|YUMB_BACSU	NADH dehydrogenase-like protein YumB OS=Bacillus subtilis (strain 168) GN=yumB PE=3 SV=1	4307	45133	91.08	IVILGAGYGGLMTVTR	Oxidation (M)
10	1::sw|O05267|YUMB_BACSU	NADH dehydrogenase-like protein YumB OS=Bacillus subtilis (strain 168) GN=yumB PE=3 SV=1	4307	45133	87.06	GTVASLGEHNAVGVVYGR
10	1::sw|O05267|YUMB_BACSU	NADH dehydrogenase-like protein YumB OS=Bacillus subtilis (strain 168) GN=yumB PE=3 SV=1	4307	45133	86.28	GTVASLGEHNAVGVVYGR
10	1::sw|O05267|YUMB_BACSU	NADH dehydrogenase-like protein YumB OS=Bacillus subtilis (strain 168) GN=yumB PE=3 SV=1	4307	45133	78.34	GTVASLGEHNAVGVVYGR
10	1::sw|O05267|YUMB_BACSU	NADH dehydrogenase-like protein YumB OS=Bacillus subtilis (strain 168) GN=yumB PE=3 SV=1	4307	45133	23.7	GTVASLGEHNAVGVVYGR
10	1::sw|O05267|YUMB_BACSU	NADH dehydrogenase-like protein YumB OS=Bacillus subtilis (strain 168) GN=yumB PE=3 SV=1	4307	45133	39.81	GTVASLGEHNAVGVVYGR
10	1::sw|O05267|YUMB_BACSU	NADH dehydrogenase-like protein YumB OS=Bacillus subtilis (strain 168) GN=yumB PE=3 SV=1	4307	45133	23.52	GTVASLGEHNAVGVVYGR
10	1::sw|O05267|YUMB_BACSU	NADH dehydrogenase-like protein YumB OS=Bacillus subtilis (strain 168) GN=yumB PE=3 SV=1	4307	45133	29.42	GTVASLGEHNAVGVVYGR
10	1::sw|O05267|YUMB_BACSU	NADH dehydrogenase-like protein YumB OS=Bacillus subtilis (strain 168) GN=yumB PE=3 SV=1	4307	45133	58.14	EHIELQFATYNTEAEK
10	1::sw|O05267|YUMB_BACSU	NADH dehydrogenase-like protein YumB OS=Bacillus subtilis (strain 168) GN=yumB PE=3 SV=1	4307	45133	30.09	EHIELQFATYNTEAEK
10	1::sw|O05267|YUMB_BACSU	NADH dehydrogenase-like protein YumB OS=Bacillus subtilis (strain 168) GN=yumB PE=3 SV=1	4307	45133	18.5	EHIELQFATYNTEAEK
553	1::sw|O05503|YDHK_BACSU	Uncharacterized protein YdhK OS=Bacillus subtilis (strain 168) GN=ydhK PE=1 SV=1	76	22579	27.68	WVIQEEIK
553	1::sw|O05503|YDHK_BACSU	Uncharacterized protein YdhK OS=Bacillus subtilis (strain 168) GN=ydhK PE=1 SV=1	76	22579	24.51	WVTEDELSAK
553	1::sw|O05503|YDHK_BACSU	Uncharacterized protein YdhK OS=Bacillus subtilis (strain 168) GN=ydhK PE=1 SV=1	76	22579	38.46	VGSQVIINTSHMK
553	1::sw|O05503|YDHK_BACSU	Uncharacterized protein YdhK OS=Bacillus subtilis (strain 168) GN=ydhK PE=1 SV=1	76	22579	33.45	VGSQVIINTSHMK
553	1::sw|O05503|YDHK_BACSU	Uncharacterized protein YdhK OS=Bacillus subtilis (strain 168) GN=ydhK PE=1 SV=1	76	22579	29.82	VGSQVIINTSHMK	Oxidation (M)
769	1::sw|O05516|TSAB_BACSU	tRNA threonylcarbamoyladenosine biosynthesis protein TsaB OS=Bacillus subtilis (strain 168) GN=tsaB PE=1 SV=1	32	25284	31.7	EDTVIAEYITYLK
671	1::sw|O05518|TSAD_BACSU	tRNA N6-adenosine threonylcarbamoyltransferase OS=Bacillus subtilis (strain 168) GN=tsaD PE=1 SV=1	49	36933	29.81	QVLLAGGVAANR
671	1::sw|O05518|TSAD_BACSU	tRNA N6-adenosine threonylcarbamoyltransferase OS=Bacillus subtilis (strain 168) GN=tsaD PE=1 SV=1	49	36933	36.34	SAVINTLHNASQK
416	1::sw|O05521|REX_BACSU	Redox-sensing transcriptional repressor rex OS=Bacillus subtilis (strain 168) GN=rex PE=1 SV=1	141	24077	28.02	LNVPEHIR
416	1::sw|O05521|REX_BACSU	Redox-sensing transcriptional repressor rex OS=Bacillus subtilis (strain 168) GN=rex PE=1 SV=1	141	24077	22.65	RLPLYYR
416	1::sw|O05521|REX_BACSU	Redox-sensing transcriptional repressor rex OS=Bacillus subtilis (strain 168) GN=rex PE=1 SV=1	141	24077	40.48	DFSYFGALGK
416	1::sw|O05521|REX_BACSU	Redox-sensing transcriptional repressor rex OS=Bacillus subtilis (strain 168) GN=rex PE=1 SV=1	141	24077	79.22	VSSAELSDAVK
416	1::sw|O05521|REX_BACSU	Redox-sensing transcriptional repressor rex OS=Bacillus subtilis (strain 168) GN=rex PE=1 SV=1	141	24077	21.46	VSSAELSDAVK
416	1::sw|O05521|REX_BACSU	Redox-sensing transcriptional repressor rex OS=Bacillus subtilis (strain 168) GN=rex PE=1 SV=1	141	24077	63.67	GYGYNVDYLLSFFR
705	1::sw|O05525|YDIL_BACSU	Putative membrane peptidase YdiL OS=Bacillus subtilis (strain 168) GN=ydiL PE=3 SV=1	43	27629	43.18	IIFGALYEK
181	1::sw|O06012|ADHB_BACSU	Uncharacterized zinc-type alcohol dehydrogenase-like protein AdhB OS=Bacillus subtilis (strain 168) GN=adhB PE=3 SV=2	413	41695	39.55	SDDMIIK
181	1::sw|O06012|ADHB_BACSU	Uncharacterized zinc-type alcohol dehydrogenase-like protein AdhB OS=Bacillus subtilis (strain 168) GN=adhB PE=3 SV=2	413	41695	27.13	AVTYQGIK
181	1::sw|O06012|ADHB_BACSU	Uncharacterized zinc-type alcohol dehydrogenase-like protein AdhB OS=Bacillus subtilis (strain 168) GN=adhB PE=3 SV=2	413	41695	58.83	HGYDIFDSK
181	1::sw|O06012|ADHB_BACSU	Uncharacterized zinc-type alcohol dehydrogenase-like protein AdhB OS=Bacillus subtilis (strain 168) GN=adhB PE=3 SV=2	413	41695	28.65	VPFANFTHFK
181	1::sw|O06012|ADHB_BACSU	Uncharacterized zinc-type alcohol dehydrogenase-like protein AdhB OS=Bacillus subtilis (strain 168) GN=adhB PE=3 SV=2	413	41695	51.22	VIAVDYVNYR
181	1::sw|O06012|ADHB_BACSU	Uncharacterized zinc-type alcohol dehydrogenase-like protein AdhB OS=Bacillus subtilis (strain 168) GN=adhB PE=3 SV=2	413	41695	90.37	MSDLEFLASGLK
181	1::sw|O06012|ADHB_BACSU	Uncharacterized zinc-type alcohol dehydrogenase-like protein AdhB OS=Bacillus subtilis (strain 168) GN=adhB PE=3 SV=2	413	41695	30.95	IPESCEEPDEK
181	1::sw|O06012|ADHB_BACSU	Uncharacterized zinc-type alcohol dehydrogenase-like protein AdhB OS=Bacillus subtilis (strain 168) GN=adhB PE=3 SV=2	413	41695	33.97	IPESCEEPDEK
181	1::sw|O06012|ADHB_BACSU	Uncharacterized zinc-type alcohol dehydrogenase-like protein AdhB OS=Bacillus subtilis (strain 168) GN=adhB PE=3 SV=2	413	41695	59.17	KGGTIQITGVYGGR
181	1::sw|O06012|ADHB_BACSU	Uncharacterized zinc-type alcohol dehydrogenase-like protein AdhB OS=Bacillus subtilis (strain 168) GN=adhB PE=3 SV=2	413	41695	39.82	KGGTIQITGVYGGR
181	1::sw|O06012|ADHB_BACSU	Uncharacterized zinc-type alcohol dehydrogenase-like protein AdhB OS=Bacillus subtilis (strain 168) GN=adhB PE=3 SV=2	413	41695	91.28	GGADVVIDAVGMDGK	Oxidation (M)
181	1::sw|O06012|ADHB_BACSU	Uncharacterized zinc-type alcohol dehydrogenase-like protein AdhB OS=Bacillus subtilis (strain 168) GN=adhB PE=3 SV=2	413	41695	19.81	LHGGTMSALVIASQAVR
181	1::sw|O06012|ADHB_BACSU	Uncharacterized zinc-type alcohol dehydrogenase-like protein AdhB OS=Bacillus subtilis (strain 168) GN=adhB PE=3 SV=2	413	41695	32.9	LHGGTMSALVIASQAVR
181	1::sw|O06012|ADHB_BACSU	Uncharacterized zinc-type alcohol dehydrogenase-like protein AdhB OS=Bacillus subtilis (strain 168) GN=adhB PE=3 SV=2	413	41695	54.75	IDPGDVVSHVLPLSEAK
181	1::sw|O06012|ADHB_BACSU	Uncharacterized zinc-type alcohol dehydrogenase-like protein AdhB OS=Bacillus subtilis (strain 168) GN=adhB PE=3 SV=2	413	41695	52.42	KGDTVIVLGCGPVGLFAQK
181	1::sw|O06012|ADHB_BACSU	Uncharacterized zinc-type alcohol dehydrogenase-like protein AdhB OS=Bacillus subtilis (strain 168) GN=adhB PE=3 SV=2	413	41695	22.33	VEIVNFEDHENTGNYLK
181	1::sw|O06012|ADHB_BACSU	Uncharacterized zinc-type alcohol dehydrogenase-like protein AdhB OS=Bacillus subtilis (strain 168) GN=adhB PE=3 SV=2	413	41695	23.16	SGQAPVIHYMPYMFELVSTGK
707	1::sw|O06478|ALDH5_BACSU	Putative aldehyde dehydrogenase YfmT OS=Bacillus subtilis (strain 168) GN=yfmT PE=2 SV=1	42	53402	42.02	TVEQAIEEGAVPVK
120	1::sw|O06491|GATA_BACSU	Glutamyl-tRNA(Gln) amidotransferase subunit A OS=Bacillus subtilis (strain 168) GN=gatA PE=3 SV=3	672	52802	21.4	ESVLAALK
120	1::sw|O06491|GATA_BACSU	Glutamyl-tRNA(Gln) amidotransferase subunit A OS=Bacillus subtilis (strain 168) GN=gatA PE=3 SV=3	672	52802	20.73	EYLGEGVGK
120	1::sw|O06491|GATA_BACSU	Glutamyl-tRNA(Gln) amidotransferase subunit A OS=Bacillus subtilis (strain 168) GN=gatA PE=3 SV=3	672	52802	35.11	ELDEAVDGR
120	1::sw|O06491|GATA_BACSU	Glutamyl-tRNA(Gln) amidotransferase subunit A OS=Bacillus subtilis (strain 168) GN=gatA PE=3 SV=3	672	52802	70.14	LQDAEAVTIGK
120	1::sw|O06491|GATA_BACSU	Glutamyl-tRNA(Gln) amidotransferase subunit A OS=Bacillus subtilis (strain 168) GN=gatA PE=3 SV=3	672	52802	93.83	LQDAEAVTIGK
120	1::sw|O06491|GATA_BACSU	Glutamyl-tRNA(Gln) amidotransferase subunit A OS=Bacillus subtilis (strain 168) GN=gatA PE=3 SV=3	672	52802	71.94	LQDAEAVTIGK
120	1::sw|O06491|GATA_BACSU	Glutamyl-tRNA(Gln) amidotransferase subunit A OS=Bacillus subtilis (strain 168) GN=gatA PE=3 SV=3	672	52802	50.71	LQDAEAVTIGK
120	1::sw|O06491|GATA_BACSU	Glutamyl-tRNA(Gln) amidotransferase subunit A OS=Bacillus subtilis (strain 168) GN=gatA PE=3 SV=3	672	52802	51.14	HFDESTVYR
120	1::sw|O06491|GATA_BACSU	Glutamyl-tRNA(Gln) amidotransferase subunit A OS=Bacillus subtilis (strain 168) GN=gatA PE=3 SV=3	672	52802	20.38	KDFEDVFEK
120	1::sw|O06491|GATA_BACSU	Glutamyl-tRNA(Gln) amidotransferase subunit A OS=Bacillus subtilis (strain 168) GN=gatA PE=3 SV=3	672	52802	75.17	VQAFLALDEER
120	1::sw|O06491|GATA_BACSU	Glutamyl-tRNA(Gln) amidotransferase subunit A OS=Bacillus subtilis (strain 168) GN=gatA PE=3 SV=3	672	52802	68.9	ISDLVDESYKR
120	1::sw|O06491|GATA_BACSU	Glutamyl-tRNA(Gln) amidotransferase subunit A OS=Bacillus subtilis (strain 168) GN=gatA PE=3 SV=3	672	52802	20.79	ISDLVDESYKR
120	1::sw|O06491|GATA_BACSU	Glutamyl-tRNA(Gln) amidotransferase subunit A OS=Bacillus subtilis (strain 168) GN=gatA PE=3 SV=3	672	52802	50.08	TDNADNLIDLYK
120	1::sw|O06491|GATA_BACSU	Glutamyl-tRNA(Gln) amidotransferase subunit A OS=Bacillus subtilis (strain 168) GN=gatA PE=3 SV=3	672	52802	34.83	SEHGLLFGMPIGVK
120	1::sw|O06491|GATA_BACSU	Glutamyl-tRNA(Gln) amidotransferase subunit A OS=Bacillus subtilis (strain 168) GN=gatA PE=3 SV=3	672	52802	41.98	YDVIVGPTTPTPAFK
120	1::sw|O06491|GATA_BACSU	Glutamyl-tRNA(Gln) amidotransferase subunit A OS=Bacillus subtilis (strain 168) GN=gatA PE=3 SV=3	672	52802	43.54	YDVIVGPTTPTPAFK
120	1::sw|O06491|GATA_BACSU	Glutamyl-tRNA(Gln) amidotransferase subunit A OS=Bacillus subtilis (strain 168) GN=gatA PE=3 SV=3	672	52802	79.72	TVEDNAFLLQAISGVDK
120	1::sw|O06491|GATA_BACSU	Glutamyl-tRNA(Gln) amidotransferase subunit A OS=Bacillus subtilis (strain 168) GN=gatA PE=3 SV=3	672	52802	78.17	TVEDNAFLLQAISGVDK
120	1::sw|O06491|GATA_BACSU	Glutamyl-tRNA(Gln) amidotransferase subunit A OS=Bacillus subtilis (strain 168) GN=gatA PE=3 SV=3	672	52802	35.72	QPASFCGVVGLKPTYGR
120	1::sw|O06491|GATA_BACSU	Glutamyl-tRNA(Gln) amidotransferase subunit A OS=Bacillus subtilis (strain 168) GN=gatA PE=3 SV=3	672	52802	61.88	ILENFDPIYDATVVQR
120	1::sw|O06491|GATA_BACSU	Glutamyl-tRNA(Gln) amidotransferase subunit A OS=Bacillus subtilis (strain 168) GN=gatA PE=3 SV=3	672	52802	25.47	ILENFDPIYDATVVQR
120	1::sw|O06491|GATA_BACSU	Glutamyl-tRNA(Gln) amidotransferase subunit A OS=Bacillus subtilis (strain 168) GN=gatA PE=3 SV=3	672	52802	60.71	YGLVAFASSLDQIGPITR
120	1::sw|O06491|GATA_BACSU	Glutamyl-tRNA(Gln) amidotransferase subunit A OS=Bacillus subtilis (strain 168) GN=gatA PE=3 SV=3	672	52802	33.31	VLEGLGATWEEVSLPHSK
701	1::sw|O06493|OPUE_BACSU	Osmoregulated proline transporter OS=Bacillus subtilis (strain 168) GN=opuE PE=3 SV=1	43	53248	43.47	TTDINDYMLGGR
439	1::sw|O06725|YISL_BACSU	UPF0344 protein YisL OS=Bacillus subtilis (strain 168) GN=yisL PE=3 SV=1	125	13213	45.46	FANWNGEYAGK
439	1::sw|O06725|YISL_BACSU	UPF0344 protein YisL OS=Bacillus subtilis (strain 168) GN=yisL PE=3 SV=1	125	13213	21.07	FANWNGEYAGK
439	1::sw|O06725|YISL_BACSU	UPF0344 protein YisL OS=Bacillus subtilis (strain 168) GN=yisL PE=3 SV=1	125	13213	62.26	FANWNGEYAGK
439	1::sw|O06725|YISL_BACSU	UPF0344 protein YisL OS=Bacillus subtilis (strain 168) GN=yisL PE=3 SV=1	125	13213	46.58	FANWNGEYAGK
439	1::sw|O06725|YISL_BACSU	UPF0344 protein YisL OS=Bacillus subtilis (strain 168) GN=yisL PE=3 SV=1	125	13213	23.18	FANWNGEYAGK
711	1::sw|O06741|YITF_BACSU	Putative isomerase YitF OS=Bacillus subtilis (strain 168) GN=yitF PE=1 SV=1	41	42424	21.52	KGFEQIK
711	1::sw|O06741|YITF_BACSU	Putative isomerase YitF OS=Bacillus subtilis (strain 168) GN=yitF PE=1 SV=1	41	42424	40.7	SVSNVEAQLK
285	1::sw|O06965|YVCA_BACSU	Putative lipoprotein YvcA OS=Bacillus subtilis (strain 168) GN=yvcA PE=2 SV=2	249	28082	26.42	MLFPEDGK
285	1::sw|O06965|YVCA_BACSU	Putative lipoprotein YvcA OS=Bacillus subtilis (strain 168) GN=yvcA PE=2 SV=2	249	28082	52.81	TMLDIVSGK
285	1::sw|O06965|YVCA_BACSU	Putative lipoprotein YvcA OS=Bacillus subtilis (strain 168) GN=yvcA PE=2 SV=2	249	28082	31.39	NDYKGEYK
285	1::sw|O06965|YVCA_BACSU	Putative lipoprotein YvcA OS=Bacillus subtilis (strain 168) GN=yvcA PE=2 SV=2	249	28082	25.01	EESFANEPK
285	1::sw|O06965|YVCA_BACSU	Putative lipoprotein YvcA OS=Bacillus subtilis (strain 168) GN=yvcA PE=2 SV=2	249	28082	41.05	DIFDDIDRK
285	1::sw|O06965|YVCA_BACSU	Putative lipoprotein YvcA OS=Bacillus subtilis (strain 168) GN=yvcA PE=2 SV=2	249	28082	39.23	DIFDDIDRK
285	1::sw|O06965|YVCA_BACSU	Putative lipoprotein YvcA OS=Bacillus subtilis (strain 168) GN=yvcA PE=2 SV=2	249	28082	24.55	LINSITFLIDK
285	1::sw|O06965|YVCA_BACSU	Putative lipoprotein YvcA OS=Bacillus subtilis (strain 168) GN=yvcA PE=2 SV=2	249	28082	54.36	LINSITFLIDK
285	1::sw|O06965|YVCA_BACSU	Putative lipoprotein YvcA OS=Bacillus subtilis (strain 168) GN=yvcA PE=2 SV=2	249	28082	63.2	EEEPGYYLLESK
285	1::sw|O06965|YVCA_BACSU	Putative lipoprotein YvcA OS=Bacillus subtilis (strain 168) GN=yvcA PE=2 SV=2	249	28082	69	NENQPCSLDEEK
285	1::sw|O06965|YVCA_BACSU	Putative lipoprotein YvcA OS=Bacillus subtilis (strain 168) GN=yvcA PE=2 SV=2	249	28082	47.33	YNYSYSYFGYVK
633	1::sw|O06967|BMRA_BACSU	Multidrug resistance ABC transporter ATP-binding/permease protein BmrA OS=Bacillus subtilis (strain 168) GN=bmrA PE=1 SV=1	56	64535	23.49	TTIVIAHR
633	1::sw|O06967|BMRA_BACSU	Multidrug resistance ABC transporter ATP-binding/permease protein BmrA OS=Bacillus subtilis (strain 168) GN=bmrA PE=1 SV=1	56	64535	30.45	GIMLSGGQR
633	1::sw|O06967|BMRA_BACSU	Multidrug resistance ABC transporter ATP-binding/permease protein BmrA OS=Bacillus subtilis (strain 168) GN=bmrA PE=1 SV=1	56	64535	18.92	EVSAVIEAGK
633	1::sw|O06967|BMRA_BACSU	Multidrug resistance ABC transporter ATP-binding/permease protein BmrA OS=Bacillus subtilis (strain 168) GN=bmrA PE=1 SV=1	56	64535	45.39	ASNAEDVEYGR
633	1::sw|O06967|BMRA_BACSU	Multidrug resistance ABC transporter ATP-binding/permease protein BmrA OS=Bacillus subtilis (strain 168) GN=bmrA PE=1 SV=1	56	64535	18.46	AAEMAYALNFIK
495	1::sw|O06973|YVCJ_BACSU	UPF0042 nucleotide-binding protein YvcJ OS=Bacillus subtilis (strain 168) GN=yvcJ PE=1 SV=1	97	33944	18.2	VALVMDLR	Oxidation (M)
495	1::sw|O06973|YVCJ_BACSU	UPF0042 nucleotide-binding protein YvcJ OS=Bacillus subtilis (strain 168) GN=yvcJ PE=1 SV=1	97	33944	20.5	DKEVSSYVMK
495	1::sw|O06973|YVCJ_BACSU	UPF0042 nucleotide-binding protein YvcJ OS=Bacillus subtilis (strain 168) GN=yvcJ PE=1 SV=1	97	33944	66.65	SQVVIAIGCTGGQHR
495	1::sw|O06973|YVCJ_BACSU	UPF0042 nucleotide-binding protein YvcJ OS=Bacillus subtilis (strain 168) GN=yvcJ PE=1 SV=1	97	33944	50.92	SHPLAATGLPLEGIALER
638	1::sw|O06974|GNGF_BACSU	Gluconeogenesis factor OS=Bacillus subtilis (strain 168) GN=mgfK PE=3 SV=1	55	34779	20	VASLLVDLLK
638	1::sw|O06974|GNGF_BACSU	Gluconeogenesis factor OS=Bacillus subtilis (strain 168) GN=mgfK PE=3 SV=1	55	34779	25.55	VASLLVDLLKE
638	1::sw|O06974|GNGF_BACSU	Gluconeogenesis factor OS=Bacillus subtilis (strain 168) GN=mgfK PE=3 SV=1	55	34779	21.09	VVSGESTIPEYGQR
638	1::sw|O06974|GNGF_BACSU	Gluconeogenesis factor OS=Bacillus subtilis (strain 168) GN=mgfK PE=3 SV=1	55	34779	50.99	NVLAALSDVEPLVEDLFQHR
654	1::sw|O06975|WHIA_BACSU	Putative sporulation transcription regulator WhiA OS=Bacillus subtilis (strain 168) GN=whiA PE=3 SV=1	51	36659	36.19	KLDEIAEQLR
654	1::sw|O06975|WHIA_BACSU	Putative sporulation transcription regulator WhiA OS=Bacillus subtilis (strain 168) GN=whiA PE=3 SV=1	51	36659	18.4	ILGENFVFER
654	1::sw|O06975|WHIA_BACSU	Putative sporulation transcription regulator WhiA OS=Bacillus subtilis (strain 168) GN=whiA PE=3 SV=1	51	36659	33.38	LVNCETANLNK
400	1::sw|O06979|YVCQ_BACSU	Sensor histidine kinase YvcQ OS=Bacillus subtilis (strain 168) GN=yvcQ PE=3 SV=1	152	40212	27.3	TGEQALWTK
400	1::sw|O06979|YVCQ_BACSU	Sensor histidine kinase YvcQ OS=Bacillus subtilis (strain 168) GN=yvcQ PE=3 SV=1	152	40212	38.16	QGVGDPITIR
400	1::sw|O06979|YVCQ_BACSU	Sensor histidine kinase YvcQ OS=Bacillus subtilis (strain 168) GN=yvcQ PE=3 SV=1	152	40212	33.67	IETQGHETR
400	1::sw|O06979|YVCQ_BACSU	Sensor histidine kinase YvcQ OS=Bacillus subtilis (strain 168) GN=yvcQ PE=3 SV=1	152	40212	36.72	IETQGHETR
400	1::sw|O06979|YVCQ_BACSU	Sensor histidine kinase YvcQ OS=Bacillus subtilis (strain 168) GN=yvcQ PE=3 SV=1	152	40212	46.6	TPVSVISLMIQEGK
400	1::sw|O06979|YVCQ_BACSU	Sensor histidine kinase YvcQ OS=Bacillus subtilis (strain 168) GN=yvcQ PE=3 SV=1	152	40212	51.85	LAEQASSSNDIGQSLK
400	1::sw|O06979|YVCQ_BACSU	Sensor histidine kinase YvcQ OS=Bacillus subtilis (strain 168) GN=yvcQ PE=3 SV=1	152	40212	43.85	LEEFAFDVKPQTFDLAEMVR
531	1::sw|O06986|YVDD_BACSU	LOG family protein YvdD OS=Bacillus subtilis (strain 168) GN=yvdD PE=1 SV=1	85	21154	53.2	YSIQEGFSNESHLK
531	1::sw|O06986|YVDD_BACSU	LOG family protein YvdD OS=Bacillus subtilis (strain 168) GN=yvdD PE=1 SV=1	85	21154	54.7	TICVFAGSNPGGNEAYK
476	1::sw|O06988|BBMA_BACSU	Intracellular maltogenic amylase OS=Bacillus subtilis (strain 168) GN=bbmA PE=3 SV=2	106	69021	38.52	KGDADHIR
476	1::sw|O06988|BBMA_BACSU	Intracellular maltogenic amylase OS=Bacillus subtilis (strain 168) GN=bbmA PE=3 SV=2	106	69021	47.96	STVWYQIFPER
476	1::sw|O06988|BBMA_BACSU	Intracellular maltogenic amylase OS=Bacillus subtilis (strain 168) GN=bbmA PE=3 SV=2	106	69021	29.51	LDVANEVDHVFWK
476	1::sw|O06988|BBMA_BACSU	Intracellular maltogenic amylase OS=Bacillus subtilis (strain 168) GN=bbmA PE=3 SV=2	106	69021	52.73	YDTLDYFSIDPHFGDPELFR
655	1::sw|O06989|MDXE_BACSU	Maltodextrin-binding protein MdxE OS=Bacillus subtilis (strain 168) GN=mdxE PE=1 SV=1	51	45629	51.09	STQTSANDAVNVIK
655	1::sw|O06989|MDXE_BACSU	Maltodextrin-binding protein MdxE OS=Bacillus subtilis (strain 168) GN=mdxE PE=1 SV=1	51	45629	19.8	VYGMPLVIETLILYYNK
569	1::sw|O06990|MDXF_BACSU	Maltodextrin transport system permease protein MdxF OS=Bacillus subtilis (strain 168) GN=mdxF PE=3 SV=1	70	48668	37.32	IDGATFIQR
569	1::sw|O06990|MDXF_BACSU	Maltodextrin transport system permease protein MdxF OS=Bacillus subtilis (strain 168) GN=mdxF PE=3 SV=1	70	48668	57.67	AAGLEVNTTAK
603	1::sw|O06991|MDXG_BACSU	Maltodextrin transport system permease protein MdxG OS=Bacillus subtilis (strain 168) GN=mdxG PE=3 SV=1	62	30979	36.58	EIDEAAR
603	1::sw|O06991|MDXG_BACSU	Maltodextrin transport system permease protein MdxG OS=Bacillus subtilis (strain 168) GN=mdxG PE=3 SV=1	62	30979	20.71	IDGAGHLR
603	1::sw|O06991|MDXG_BACSU	Maltodextrin transport system permease protein MdxG OS=Bacillus subtilis (strain 168) GN=mdxG PE=3 SV=1	62	30979	31.88	GYFDTVPR
603	1::sw|O06991|MDXG_BACSU	Maltodextrin transport system permease protein MdxG OS=Bacillus subtilis (strain 168) GN=mdxG PE=3 SV=1	62	30979	37.36	NFVSGLTAGGTK
806	1::sw|O06994|O16G1_BACSU	Oligo-1,6-glucosidase 1 OS=Bacillus subtilis (strain 168) GN=malL PE=1 SV=1	26	66153	25.88	VLISNYPQER
546	1::sw|O07001|YVDT_BACSU	Uncharacterized HTH-type transcriptional regulator YvdT OS=Bacillus subtilis (strain 168) GN=yvdT PE=1 SV=1	80	22271	79.63	TIINLVENTAER
148	1::sw|O07002|ASPP_BACSU	Aspartate-proton symporter OS=Bacillus subtilis (strain 168) GN=yveA PE=1 SV=1	547	57180	23.11	AAIDYDK
148	1::sw|O07002|ASPP_BACSU	Aspartate-proton symporter OS=Bacillus subtilis (strain 168) GN=yveA PE=1 SV=1	547	57180	43.39	LVYAWAR
148	1::sw|O07002|ASPP_BACSU	Aspartate-proton symporter OS=Bacillus subtilis (strain 168) GN=yveA PE=1 SV=1	547	57180	43.32	LVYAWAR
148	1::sw|O07002|ASPP_BACSU	Aspartate-proton symporter OS=Bacillus subtilis (strain 168) GN=yveA PE=1 SV=1	547	57180	50.16	LVYAWAR
148	1::sw|O07002|ASPP_BACSU	Aspartate-proton symporter OS=Bacillus subtilis (strain 168) GN=yveA PE=1 SV=1	547	57180	23.25	LVYAWAR
148	1::sw|O07002|ASPP_BACSU	Aspartate-proton symporter OS=Bacillus subtilis (strain 168) GN=yveA PE=1 SV=1	547	57180	19.27	HGWPAIGR
148	1::sw|O07002|ASPP_BACSU	Aspartate-proton symporter OS=Bacillus subtilis (strain 168) GN=yveA PE=1 SV=1	547	57180	31.97	HGWPAIGR
148	1::sw|O07002|ASPP_BACSU	Aspartate-proton symporter OS=Bacillus subtilis (strain 168) GN=yveA PE=1 SV=1	547	57180	35.61	HGWPAIGR
148	1::sw|O07002|ASPP_BACSU	Aspartate-proton symporter OS=Bacillus subtilis (strain 168) GN=yveA PE=1 SV=1	547	57180	29.4	HGWPAIGR
148	1::sw|O07002|ASPP_BACSU	Aspartate-proton symporter OS=Bacillus subtilis (strain 168) GN=yveA PE=1 SV=1	547	57180	25.35	HGWPAIGR
148	1::sw|O07002|ASPP_BACSU	Aspartate-proton symporter OS=Bacillus subtilis (strain 168) GN=yveA PE=1 SV=1	547	57180	58.89	NGTLFGIFSK
148	1::sw|O07002|ASPP_BACSU	Aspartate-proton symporter OS=Bacillus subtilis (strain 168) GN=yveA PE=1 SV=1	547	57180	63.28	NGTLFGIFSK
148	1::sw|O07002|ASPP_BACSU	Aspartate-proton symporter OS=Bacillus subtilis (strain 168) GN=yveA PE=1 SV=1	547	57180	54.4	NGTLFGIFSK
148	1::sw|O07002|ASPP_BACSU	Aspartate-proton symporter OS=Bacillus subtilis (strain 168) GN=yveA PE=1 SV=1	547	57180	35.91	EDVSLAQQLK
148	1::sw|O07002|ASPP_BACSU	Aspartate-proton symporter OS=Bacillus subtilis (strain 168) GN=yveA PE=1 SV=1	547	57180	51.44	EDVSLAQQLK
148	1::sw|O07002|ASPP_BACSU	Aspartate-proton symporter OS=Bacillus subtilis (strain 168) GN=yveA PE=1 SV=1	547	57180	35.31	EDVSLAQQLK
148	1::sw|O07002|ASPP_BACSU	Aspartate-proton symporter OS=Bacillus subtilis (strain 168) GN=yveA PE=1 SV=1	547	57180	57.45	EDVSLAQQLK
148	1::sw|O07002|ASPP_BACSU	Aspartate-proton symporter OS=Bacillus subtilis (strain 168) GN=yveA PE=1 SV=1	547	57180	45.55	EDVSLAQQLK
148	1::sw|O07002|ASPP_BACSU	Aspartate-proton symporter OS=Bacillus subtilis (strain 168) GN=yveA PE=1 SV=1	547	57180	47.24	EDVSLAQQLK
148	1::sw|O07002|ASPP_BACSU	Aspartate-proton symporter OS=Bacillus subtilis (strain 168) GN=yveA PE=1 SV=1	547	57180	55.44	EDVSLAQQLK
148	1::sw|O07002|ASPP_BACSU	Aspartate-proton symporter OS=Bacillus subtilis (strain 168) GN=yveA PE=1 SV=1	547	57180	34.54	EDVSLAQQLK
148	1::sw|O07002|ASPP_BACSU	Aspartate-proton symporter OS=Bacillus subtilis (strain 168) GN=yveA PE=1 SV=1	547	57180	47.99	EDVSLAQQLK
148	1::sw|O07002|ASPP_BACSU	Aspartate-proton symporter OS=Bacillus subtilis (strain 168) GN=yveA PE=1 SV=1	547	57180	40.59	EDVSLAQQLK
148	1::sw|O07002|ASPP_BACSU	Aspartate-proton symporter OS=Bacillus subtilis (strain 168) GN=yveA PE=1 SV=1	547	57180	36.53	EDVSLAQQLK
148	1::sw|O07002|ASPP_BACSU	Aspartate-proton symporter OS=Bacillus subtilis (strain 168) GN=yveA PE=1 SV=1	547	57180	18.17	DLNRPFYLK
148	1::sw|O07002|ASPP_BACSU	Aspartate-proton symporter OS=Bacillus subtilis (strain 168) GN=yveA PE=1 SV=1	547	57180	20.07	DLNRPFYLK
148	1::sw|O07002|ASPP_BACSU	Aspartate-proton symporter OS=Bacillus subtilis (strain 168) GN=yveA PE=1 SV=1	547	57180	21.09	DLNRPFYLK
148	1::sw|O07002|ASPP_BACSU	Aspartate-proton symporter OS=Bacillus subtilis (strain 168) GN=yveA PE=1 SV=1	547	57180	29.13	DLNRPFYLK
148	1::sw|O07002|ASPP_BACSU	Aspartate-proton symporter OS=Bacillus subtilis (strain 168) GN=yveA PE=1 SV=1	547	57180	47.69	QYVAYWFPGLTIK
148	1::sw|O07002|ASPP_BACSU	Aspartate-proton symporter OS=Bacillus subtilis (strain 168) GN=yveA PE=1 SV=1	547	57180	39.29	QYVAYWFPGLTIK
148	1::sw|O07002|ASPP_BACSU	Aspartate-proton symporter OS=Bacillus subtilis (strain 168) GN=yveA PE=1 SV=1	547	57180	51.72	QYVAYWFPGLTIK
667	1::sw|O07020|LUTA_BACSU	Lactate utilization protein A OS=Bacillus subtilis (strain 168) GN=lutA PE=1 SV=1	50	27002	22.63	KEPMK
667	1::sw|O07020|LUTA_BACSU	Lactate utilization protein A OS=Bacillus subtilis (strain 168) GN=lutA PE=1 SV=1	50	27002	49.62	MAQISEQMVDEK
763	1::sw|O07086|YRDR_BACSU	Uncharacterized transporter YrdR OS=Bacillus subtilis (strain 168) GN=yrdR PE=3 SV=1	33	36003	23.7	QVLQKEK
763	1::sw|O07086|YRDR_BACSU	Uncharacterized transporter YrdR OS=Bacillus subtilis (strain 168) GN=yrdR PE=3 SV=1	33	36003	32.55	QVLQKEK
197	1::sw|O07516|YHAH_BACSU	Uncharacterized membrane protein YhaH OS=Bacillus subtilis (strain 168) GN=yhaH PE=4 SV=1	377	13058	22.79	EIADIEEK
197	1::sw|O07516|YHAH_BACSU	Uncharacterized membrane protein YhaH OS=Bacillus subtilis (strain 168) GN=yhaH PE=4 SV=1	377	13058	28.24	DVGGELQTSIK
197	1::sw|O07516|YHAH_BACSU	Uncharacterized membrane protein YhaH OS=Bacillus subtilis (strain 168) GN=yhaH PE=4 SV=1	377	13058	40.06	DVGGELQTSIK
197	1::sw|O07516|YHAH_BACSU	Uncharacterized membrane protein YhaH OS=Bacillus subtilis (strain 168) GN=yhaH PE=4 SV=1	377	13058	61.2	DVGGELQTSIK
197	1::sw|O07516|YHAH_BACSU	Uncharacterized membrane protein YhaH OS=Bacillus subtilis (strain 168) GN=yhaH PE=4 SV=1	377	13058	53.19	DVGGELQTSIK
197	1::sw|O07516|YHAH_BACSU	Uncharacterized membrane protein YhaH OS=Bacillus subtilis (strain 168) GN=yhaH PE=4 SV=1	377	13058	27.5	DVGGELQTSIK
197	1::sw|O07516|YHAH_BACSU	Uncharacterized membrane protein YhaH OS=Bacillus subtilis (strain 168) GN=yhaH PE=4 SV=1	377	13058	50.42	DVGGELQTSIK
197	1::sw|O07516|YHAH_BACSU	Uncharacterized membrane protein YhaH OS=Bacillus subtilis (strain 168) GN=yhaH PE=4 SV=1	377	13058	55.99	DVGGELQTSIK
197	1::sw|O07516|YHAH_BACSU	Uncharacterized membrane protein YhaH OS=Bacillus subtilis (strain 168) GN=yhaH PE=4 SV=1	377	13058	51.06	DVGGELQTSIK
197	1::sw|O07516|YHAH_BACSU	Uncharacterized membrane protein YhaH OS=Bacillus subtilis (strain 168) GN=yhaH PE=4 SV=1	377	13058	54.46	SDGLALKDQLIK
197	1::sw|O07516|YHAH_BACSU	Uncharacterized membrane protein YhaH OS=Bacillus subtilis (strain 168) GN=yhaH PE=4 SV=1	377	13058	56.03	TNYDSFEETIK
197	1::sw|O07516|YHAH_BACSU	Uncharacterized membrane protein YhaH OS=Bacillus subtilis (strain 168) GN=yhaH PE=4 SV=1	377	13058	72.21	TNYDSFEETIKR
197	1::sw|O07516|YHAH_BACSU	Uncharacterized membrane protein YhaH OS=Bacillus subtilis (strain 168) GN=yhaH PE=4 SV=1	377	13058	38.38	TNYDSFEETIKR
197	1::sw|O07516|YHAH_BACSU	Uncharacterized membrane protein YhaH OS=Bacillus subtilis (strain 168) GN=yhaH PE=4 SV=1	377	13058	20.45	WQEEIKPHQQDLQK
197	1::sw|O07516|YHAH_BACSU	Uncharacterized membrane protein YhaH OS=Bacillus subtilis (strain 168) GN=yhaH PE=4 SV=1	377	13058	21.76	WQEEIKPHQQDLQK
197	1::sw|O07516|YHAH_BACSU	Uncharacterized membrane protein YhaH OS=Bacillus subtilis (strain 168) GN=yhaH PE=4 SV=1	377	13058	39.45	ESTDVIKDVGGELQTSIK
445	1::sw|O07523|YHAP_BACSU	Uncharacterized protein YhaP OS=Bacillus subtilis (strain 168) GN=yhaP PE=1 SV=2	122	45446	18.3	GTISGTYK
445	1::sw|O07523|YHAP_BACSU	Uncharacterized protein YhaP OS=Bacillus subtilis (strain 168) GN=yhaP PE=1 SV=2	122	45446	71.23	AVDTDGDLDVK
445	1::sw|O07523|YHAP_BACSU	Uncharacterized protein YhaP OS=Bacillus subtilis (strain 168) GN=yhaP PE=1 SV=2	122	45446	49.43	GGVLIYGNSSAFK
445	1::sw|O07523|YHAP_BACSU	Uncharacterized protein YhaP OS=Bacillus subtilis (strain 168) GN=yhaP PE=1 SV=2	122	45446	36.59	IAVVDETNELYPVFSK
445	1::sw|O07523|YHAP_BACSU	Uncharacterized protein YhaP OS=Bacillus subtilis (strain 168) GN=yhaP PE=1 SV=2	122	45446	29.98	IAVVDETNELYPVFSK
116	1::sw|O07543|YHEB_BACSU	UPF0754 membrane protein YheB OS=Bacillus subtilis (strain 168) GN=yheB PE=3 SV=1	695	42881	36.64	LLSDLLK
116	1::sw|O07543|YHEB_BACSU	UPF0754 membrane protein YheB OS=Bacillus subtilis (strain 168) GN=yheB PE=3 SV=1	695	42881	24.6	LHELFR
116	1::sw|O07543|YHEB_BACSU	UPF0754 membrane protein YheB OS=Bacillus subtilis (strain 168) GN=yheB PE=3 SV=1	695	42881	18.71	AYYLFGK
116	1::sw|O07543|YHEB_BACSU	UPF0754 membrane protein YheB OS=Bacillus subtilis (strain 168) GN=yheB PE=3 SV=1	695	42881	24.25	VGEQLIQK
116	1::sw|O07543|YHEB_BACSU	UPF0754 membrane protein YheB OS=Bacillus subtilis (strain 168) GN=yheB PE=3 SV=1	695	42881	71.24	VGEQLIQK
116	1::sw|O07543|YHEB_BACSU	UPF0754 membrane protein YheB OS=Bacillus subtilis (strain 168) GN=yheB PE=3 SV=1	695	42881	30.69	YFESDEGK
116	1::sw|O07543|YHEB_BACSU	UPF0754 membrane protein YheB OS=Bacillus subtilis (strain 168) GN=yheB PE=3 SV=1	695	42881	19.47	LSLSEVTVK
116	1::sw|O07543|YHEB_BACSU	UPF0754 membrane protein YheB OS=Bacillus subtilis (strain 168) GN=yheB PE=3 SV=1	695	42881	18.99	LSLSEVTVK
116	1::sw|O07543|YHEB_BACSU	UPF0754 membrane protein YheB OS=Bacillus subtilis (strain 168) GN=yheB PE=3 SV=1	695	42881	19.11	LSLSEVTVK
116	1::sw|O07543|YHEB_BACSU	UPF0754 membrane protein YheB OS=Bacillus subtilis (strain 168) GN=yheB PE=3 SV=1	695	42881	19.1	LSLSEVTVK
116	1::sw|O07543|YHEB_BACSU	UPF0754 membrane protein YheB OS=Bacillus subtilis (strain 168) GN=yheB PE=3 SV=1	695	42881	18.88	LSLSEVTVK
116	1::sw|O07543|YHEB_BACSU	UPF0754 membrane protein YheB OS=Bacillus subtilis (strain 168) GN=yheB PE=3 SV=1	695	42881	18.74	LSLSEVTVK
116	1::sw|O07543|YHEB_BACSU	UPF0754 membrane protein YheB OS=Bacillus subtilis (strain 168) GN=yheB PE=3 SV=1	695	42881	48.21	LSLSEVTVK
116	1::sw|O07543|YHEB_BACSU	UPF0754 membrane protein YheB OS=Bacillus subtilis (strain 168) GN=yheB PE=3 SV=1	695	42881	31.03	LRLEEIVK
116	1::sw|O07543|YHEB_BACSU	UPF0754 membrane protein YheB OS=Bacillus subtilis (strain 168) GN=yheB PE=3 SV=1	695	42881	36.55	VPFTPGLIPR
116	1::sw|O07543|YHEB_BACSU	UPF0754 membrane protein YheB OS=Bacillus subtilis (strain 168) GN=yheB PE=3 SV=1	695	42881	58.17	LEEMVLSISK
116	1::sw|O07543|YHEB_BACSU	UPF0754 membrane protein YheB OS=Bacillus subtilis (strain 168) GN=yheB PE=3 SV=1	695	42881	39.83	LEEMVLSISK	Oxidation (M)
116	1::sw|O07543|YHEB_BACSU	UPF0754 membrane protein YheB OS=Bacillus subtilis (strain 168) GN=yheB PE=3 SV=1	695	42881	67.59	LGNMIDDFLK
116	1::sw|O07543|YHEB_BACSU	UPF0754 membrane protein YheB OS=Bacillus subtilis (strain 168) GN=yheB PE=3 SV=1	695	42881	28.83	ELVPIEVQEK
116	1::sw|O07543|YHEB_BACSU	UPF0754 membrane protein YheB OS=Bacillus subtilis (strain 168) GN=yheB PE=3 SV=1	695	42881	25	ELVPIEVQEK
116	1::sw|O07543|YHEB_BACSU	UPF0754 membrane protein YheB OS=Bacillus subtilis (strain 168) GN=yheB PE=3 SV=1	695	42881	35.11	EYTFNEADEK
116	1::sw|O07543|YHEB_BACSU	UPF0754 membrane protein YheB OS=Bacillus subtilis (strain 168) GN=yheB PE=3 SV=1	695	42881	44.16	EYTFNEADEK
116	1::sw|O07543|YHEB_BACSU	UPF0754 membrane protein YheB OS=Bacillus subtilis (strain 168) GN=yheB PE=3 SV=1	695	42881	42.43	EQVDQFPVER
116	1::sw|O07543|YHEB_BACSU	UPF0754 membrane protein YheB OS=Bacillus subtilis (strain 168) GN=yheB PE=3 SV=1	695	42881	54.4	EQVDQFPVER
116	1::sw|O07543|YHEB_BACSU	UPF0754 membrane protein YheB OS=Bacillus subtilis (strain 168) GN=yheB PE=3 SV=1	695	42881	52.7	EQVDQFPVER
116	1::sw|O07543|YHEB_BACSU	UPF0754 membrane protein YheB OS=Bacillus subtilis (strain 168) GN=yheB PE=3 SV=1	695	42881	55.72	EQVDQFPVER
116	1::sw|O07543|YHEB_BACSU	UPF0754 membrane protein YheB OS=Bacillus subtilis (strain 168) GN=yheB PE=3 SV=1	695	42881	25.7	EQVDQFPVER
116	1::sw|O07543|YHEB_BACSU	UPF0754 membrane protein YheB OS=Bacillus subtilis (strain 168) GN=yheB PE=3 SV=1	695	42881	52.77	EQVDQFPVER
116	1::sw|O07543|YHEB_BACSU	UPF0754 membrane protein YheB OS=Bacillus subtilis (strain 168) GN=yheB PE=3 SV=1	695	42881	20.03	EQVDQFPVER
116	1::sw|O07543|YHEB_BACSU	UPF0754 membrane protein YheB OS=Bacillus subtilis (strain 168) GN=yheB PE=3 SV=1	695	42881	52.37	EQVDQFPVER
116	1::sw|O07543|YHEB_BACSU	UPF0754 membrane protein YheB OS=Bacillus subtilis (strain 168) GN=yheB PE=3 SV=1	695	42881	30.82	EQVDQFPVER
116	1::sw|O07543|YHEB_BACSU	UPF0754 membrane protein YheB OS=Bacillus subtilis (strain 168) GN=yheB PE=3 SV=1	695	42881	19.96	IPMISGYILSR
116	1::sw|O07543|YHEB_BACSU	UPF0754 membrane protein YheB OS=Bacillus subtilis (strain 168) GN=yheB PE=3 SV=1	695	42881	21.13	RVPFTPGLIPR
116	1::sw|O07543|YHEB_BACSU	UPF0754 membrane protein YheB OS=Bacillus subtilis (strain 168) GN=yheB PE=3 SV=1	695	42881	62.69	AADAWISSWTDDK
116	1::sw|O07543|YHEB_BACSU	UPF0754 membrane protein YheB OS=Bacillus subtilis (strain 168) GN=yheB PE=3 SV=1	695	42881	55.99	LLEGISSNLESVLK
116	1::sw|O07543|YHEB_BACSU	UPF0754 membrane protein YheB OS=Bacillus subtilis (strain 168) GN=yheB PE=3 SV=1	695	42881	78.32	LLEGISSNLESVLK
116	1::sw|O07543|YHEB_BACSU	UPF0754 membrane protein YheB OS=Bacillus subtilis (strain 168) GN=yheB PE=3 SV=1	695	42881	57.67	YESELTQQMLPALLDK
116	1::sw|O07543|YHEB_BACSU	UPF0754 membrane protein YheB OS=Bacillus subtilis (strain 168) GN=yheB PE=3 SV=1	695	42881	66.88	GMLGSMVQLFLGNSSLADR
368	1::sw|O07576|YHDG_BACSU	Uncharacterized amino acid permease YhdG OS=Bacillus subtilis (strain 168) GN=yhdG PE=2 SV=1	175	49906	44.63	SIQDLIAATSGEK
368	1::sw|O07576|YHDG_BACSU	Uncharacterized amino acid permease YhdG OS=Bacillus subtilis (strain 168) GN=yhdG PE=2 SV=1	175	49906	67.57	SIQDLIAATSGEK
368	1::sw|O07576|YHDG_BACSU	Uncharacterized amino acid permease YhdG OS=Bacillus subtilis (strain 168) GN=yhdG PE=2 SV=1	175	49906	72.6	SIQDLIAATSGEK
368	1::sw|O07576|YHDG_BACSU	Uncharacterized amino acid permease YhdG OS=Bacillus subtilis (strain 168) GN=yhdG PE=2 SV=1	175	49906	25.18	SIQDLIAATSGEK
368	1::sw|O07576|YHDG_BACSU	Uncharacterized amino acid permease YhdG OS=Bacillus subtilis (strain 168) GN=yhdG PE=2 SV=1	175	49906	20.25	SIQDLIAATSGEK
368	1::sw|O07576|YHDG_BACSU	Uncharacterized amino acid permease YhdG OS=Bacillus subtilis (strain 168) GN=yhdG PE=2 SV=1	175	49906	44.01	KSIQDLIAATSGEK
150	1::sw|O07581|YHDL_BACSU	Probable anti-sigma-M factor YhdL OS=Bacillus subtilis (strain 168) GN=yhdL PE=1 SV=1	512	40612	23.59	WAQVISK
150	1::sw|O07581|YHDL_BACSU	Probable anti-sigma-M factor YhdL OS=Bacillus subtilis (strain 168) GN=yhdL PE=1 SV=1	512	40612	29.28	RFDQYK
150	1::sw|O07581|YHDL_BACSU	Probable anti-sigma-M factor YhdL OS=Bacillus subtilis (strain 168) GN=yhdL PE=1 SV=1	512	40612	28.63	FLAALNTK
150	1::sw|O07581|YHDL_BACSU	Probable anti-sigma-M factor YhdL OS=Bacillus subtilis (strain 168) GN=yhdL PE=1 SV=1	512	40612	41.01	FLAALNTK
150	1::sw|O07581|YHDL_BACSU	Probable anti-sigma-M factor YhdL OS=Bacillus subtilis (strain 168) GN=yhdL PE=1 SV=1	512	40612	39.34	FLAALNTK
150	1::sw|O07581|YHDL_BACSU	Probable anti-sigma-M factor YhdL OS=Bacillus subtilis (strain 168) GN=yhdL PE=1 SV=1	512	40612	36.07	FLAALNTK
150	1::sw|O07581|YHDL_BACSU	Probable anti-sigma-M factor YhdL OS=Bacillus subtilis (strain 168) GN=yhdL PE=1 SV=1	512	40612	42.88	FLAALNTK
150	1::sw|O07581|YHDL_BACSU	Probable anti-sigma-M factor YhdL OS=Bacillus subtilis (strain 168) GN=yhdL PE=1 SV=1	512	40612	28.53	MNEEFKK
150	1::sw|O07581|YHDL_BACSU	Probable anti-sigma-M factor YhdL OS=Bacillus subtilis (strain 168) GN=yhdL PE=1 SV=1	512	40612	35.26	VEMFYNK
150	1::sw|O07581|YHDL_BACSU	Probable anti-sigma-M factor YhdL OS=Bacillus subtilis (strain 168) GN=yhdL PE=1 SV=1	512	40612	49.72	TASTEPLGYPGK
150	1::sw|O07581|YHDL_BACSU	Probable anti-sigma-M factor YhdL OS=Bacillus subtilis (strain 168) GN=yhdL PE=1 SV=1	512	40612	62.11	TASTEPLGYPGK
150	1::sw|O07581|YHDL_BACSU	Probable anti-sigma-M factor YhdL OS=Bacillus subtilis (strain 168) GN=yhdL PE=1 SV=1	512	40612	39.17	TGHYFTHPSNK
150	1::sw|O07581|YHDL_BACSU	Probable anti-sigma-M factor YhdL OS=Bacillus subtilis (strain 168) GN=yhdL PE=1 SV=1	512	40612	26.35	TGHYFTHPSNK
150	1::sw|O07581|YHDL_BACSU	Probable anti-sigma-M factor YhdL OS=Bacillus subtilis (strain 168) GN=yhdL PE=1 SV=1	512	40612	72.54	SANVGEVELWNW
150	1::sw|O07581|YHDL_BACSU	Probable anti-sigma-M factor YhdL OS=Bacillus subtilis (strain 168) GN=yhdL PE=1 SV=1	512	40612	42.14	LFGMNTEFPLQK
150	1::sw|O07581|YHDL_BACSU	Probable anti-sigma-M factor YhdL OS=Bacillus subtilis (strain 168) GN=yhdL PE=1 SV=1	512	40612	22.99	LFGMNTEFPLQK
150	1::sw|O07581|YHDL_BACSU	Probable anti-sigma-M factor YhdL OS=Bacillus subtilis (strain 168) GN=yhdL PE=1 SV=1	512	40612	56.56	LFGMNTEFPLQK
150	1::sw|O07581|YHDL_BACSU	Probable anti-sigma-M factor YhdL OS=Bacillus subtilis (strain 168) GN=yhdL PE=1 SV=1	512	40612	66.86	NGVNVYGSVVTGPTK
150	1::sw|O07581|YHDL_BACSU	Probable anti-sigma-M factor YhdL OS=Bacillus subtilis (strain 168) GN=yhdL PE=1 SV=1	512	40612	42.27	APAVNYYDLEVNK
150	1::sw|O07581|YHDL_BACSU	Probable anti-sigma-M factor YhdL OS=Bacillus subtilis (strain 168) GN=yhdL PE=1 SV=1	512	40612	98.13	APAVNYYDLEVNK
150	1::sw|O07581|YHDL_BACSU	Probable anti-sigma-M factor YhdL OS=Bacillus subtilis (strain 168) GN=yhdL PE=1 SV=1	512	40612	68.52	GYDVSFLWNAIETEK
344	1::sw|O07584|PLSC_BACSU	1-acyl-sn-glycerol-3-phosphate acyltransferase OS=Bacillus subtilis (strain 168) GN=plsC PE=1 SV=1	195	22023	19.18	GGVKVYNK
344	1::sw|O07584|PLSC_BACSU	1-acyl-sn-glycerol-3-phosphate acyltransferase OS=Bacillus subtilis (strain 168) GN=plsC PE=1 SV=1	195	22023	57.01	GAVTIAQMGK
344	1::sw|O07584|PLSC_BACSU	1-acyl-sn-glycerol-3-phosphate acyltransferase OS=Bacillus subtilis (strain 168) GN=plsC PE=1 SV=1	195	22023	60.8	LAAMTEALNQR
344	1::sw|O07584|PLSC_BACSU	1-acyl-sn-glycerol-3-phosphate acyltransferase OS=Bacillus subtilis (strain 168) GN=plsC PE=1 SV=1	195	22023	34.29	EGEIVGIFPSGTR
344	1::sw|O07584|PLSC_BACSU	1-acyl-sn-glycerol-3-phosphate acyltransferase OS=Bacillus subtilis (strain 168) GN=plsC PE=1 SV=1	195	22023	34.16	APLVPAAYQGPSSGK
344	1::sw|O07584|PLSC_BACSU	1-acyl-sn-glycerol-3-phosphate acyltransferase OS=Bacillus subtilis (strain 168) GN=plsC PE=1 SV=1	195	22023	54.32	APLVPAAYQGPSSGK
344	1::sw|O07584|PLSC_BACSU	1-acyl-sn-glycerol-3-phosphate acyltransferase OS=Bacillus subtilis (strain 168) GN=plsC PE=1 SV=1	195	22023	51.28	APLVPAAYQGPSSGK
344	1::sw|O07584|PLSC_BACSU	1-acyl-sn-glycerol-3-phosphate acyltransferase OS=Bacillus subtilis (strain 168) GN=plsC PE=1 SV=1	195	22023	35.34	APLVPAAYQGPSSGK
307	1::sw|O07585|YHDP_BACSU	UPF0053 protein YhdP OS=Bacillus subtilis (strain 168) GN=yhdP PE=3 SV=1	227	49995	32.29	TVAIQK
307	1::sw|O07585|YHDP_BACSU	UPF0053 protein YhdP OS=Bacillus subtilis (strain 168) GN=yhdP PE=3 SV=1	227	49995	43.4	IFEFDDR
307	1::sw|O07585|YHDP_BACSU	UPF0053 protein YhdP OS=Bacillus subtilis (strain 168) GN=yhdP PE=3 SV=1	227	49995	43.3	PLIWFYR
307	1::sw|O07585|YHDP_BACSU	UPF0053 protein YhdP OS=Bacillus subtilis (strain 168) GN=yhdP PE=3 SV=1	227	49995	76.48	IDQLIAEGNK
307	1::sw|O07585|YHDP_BACSU	UPF0053 protein YhdP OS=Bacillus subtilis (strain 168) GN=yhdP PE=3 SV=1	227	49995	39.25	SGEINQSEFK
307	1::sw|O07585|YHDP_BACSU	UPF0053 protein YhdP OS=Bacillus subtilis (strain 168) GN=yhdP PE=3 SV=1	227	49995	44.76	SGEINQSEFK
307	1::sw|O07585|YHDP_BACSU	UPF0053 protein YhdP OS=Bacillus subtilis (strain 168) GN=yhdP PE=3 SV=1	227	49995	68.37	IGEGHYILDGK
307	1::sw|O07585|YHDP_BACSU	UPF0053 protein YhdP OS=Bacillus subtilis (strain 168) GN=yhdP PE=3 SV=1	227	49995	38.53	KLQEEELLETANQQEA
307	1::sw|O07585|YHDP_BACSU	UPF0053 protein YhdP OS=Bacillus subtilis (strain 168) GN=yhdP PE=3 SV=1	227	49995	27.41	YPVEEGDKDNIIGVINIK
659	1::sw|O07592|YHDW_BACSU	Putative glycerophosphoryl diester phosphodiesterase YhdW OS=Bacillus subtilis (strain 168) GN=yhdW PE=3 SV=1	50	27459	50.48	LDAGSWYGPAFQGER
653	1::sw|O07595|NPD_BACSU	NAD-dependent protein deacetylase OS=Bacillus subtilis (strain 168) GN=cobB PE=3 SV=1	51	27685	36.05	SAGGIWTEDASR
653	1::sw|O07595|NPD_BACSU	NAD-dependent protein deacetylase OS=Bacillus subtilis (strain 168) GN=cobB PE=3 SV=1	51	27685	39.3	SAGGIWTEDASR
653	1::sw|O07595|NPD_BACSU	NAD-dependent protein deacetylase OS=Bacillus subtilis (strain 168) GN=cobB PE=3 SV=1	51	27685	18.71	VIINLEPTYCDSLFDMVIHQK
837	1::sw|O07596|YHEN_BACSU	Putative polysaccharide deacetylase YheN OS=Bacillus subtilis (strain 168) GN=yheN PE=3 SV=1	22	31767	21.79	MNEFKQAVK
760	1::sw|O07603|YHFE_BACSU	Putative aminopeptidase YhfE OS=Bacillus subtilis (strain 168) GN=yhfE PE=3 SV=1	33	38883	33.14	LDEPVHCR
358	1::sw|O07608|LPLJ_BACSU	Lipoate-protein ligase LplJ OS=Bacillus subtilis (strain 168) GN=lplJ PE=1 SV=1	186	38111	75.88	VANISEFLDDK
358	1::sw|O07608|LPLJ_BACSU	Lipoate-protein ligase LplJ OS=Bacillus subtilis (strain 168) GN=lplJ PE=1 SV=1	186	38111	24.45	DWETIHQISK
358	1::sw|O07608|LPLJ_BACSU	Lipoate-protein ligase LplJ OS=Bacillus subtilis (strain 168) GN=lplJ PE=1 SV=1	186	38111	19.53	YVEENGIIVVR
358	1::sw|O07608|LPLJ_BACSU	Lipoate-protein ligase LplJ OS=Bacillus subtilis (strain 168) GN=lplJ PE=1 SV=1	186	38111	18.25	YVEENGIIVVR
358	1::sw|O07608|LPLJ_BACSU	Lipoate-protein ligase LplJ OS=Bacillus subtilis (strain 168) GN=lplJ PE=1 SV=1	186	38111	55.25	INLAIEEYCVK
358	1::sw|O07608|LPLJ_BACSU	Lipoate-protein ligase LplJ OS=Bacillus subtilis (strain 168) GN=lplJ PE=1 SV=1	186	38111	71.09	SVIADVLEGVNLK
358	1::sw|O07608|LPLJ_BACSU	Lipoate-protein ligase LplJ OS=Bacillus subtilis (strain 168) GN=lplJ PE=1 SV=1	186	38111	43.83	MLFIDNQNINDPR
50	1::sw|O07611|YHFM_BACSU	Uncharacterized protein YhfM OS=Bacillus subtilis (strain 168) GN=yhfM PE=4 SV=1	1453	14998	32.32	DRYDSFR
50	1::sw|O07611|YHFM_BACSU	Uncharacterized protein YhfM OS=Bacillus subtilis (strain 168) GN=yhfM PE=4 SV=1	1453	14998	31.51	DRYDSFR
50	1::sw|O07611|YHFM_BACSU	Uncharacterized protein YhfM OS=Bacillus subtilis (strain 168) GN=yhfM PE=4 SV=1	1453	14998	39.92	DRYDSFR
50	1::sw|O07611|YHFM_BACSU	Uncharacterized protein YhfM OS=Bacillus subtilis (strain 168) GN=yhfM PE=4 SV=1	1453	14998	55.77	DMLDIMNQGK
50	1::sw|O07611|YHFM_BACSU	Uncharacterized protein YhfM OS=Bacillus subtilis (strain 168) GN=yhfM PE=4 SV=1	1453	14998	64.41	DMLDIMNQGK
50	1::sw|O07611|YHFM_BACSU	Uncharacterized protein YhfM OS=Bacillus subtilis (strain 168) GN=yhfM PE=4 SV=1	1453	14998	54.63	DMLDIMNQGK
50	1::sw|O07611|YHFM_BACSU	Uncharacterized protein YhfM OS=Bacillus subtilis (strain 168) GN=yhfM PE=4 SV=1	1453	14998	71.14	DMLDIMNQGK
50	1::sw|O07611|YHFM_BACSU	Uncharacterized protein YhfM OS=Bacillus subtilis (strain 168) GN=yhfM PE=4 SV=1	1453	14998	53.97	DMLDIMNQGK
50	1::sw|O07611|YHFM_BACSU	Uncharacterized protein YhfM OS=Bacillus subtilis (strain 168) GN=yhfM PE=4 SV=1	1453	14998	66.32	DMLDIMNQGK
50	1::sw|O07611|YHFM_BACSU	Uncharacterized protein YhfM OS=Bacillus subtilis (strain 168) GN=yhfM PE=4 SV=1	1453	14998	29.54	DMLDIMNQGK
50	1::sw|O07611|YHFM_BACSU	Uncharacterized protein YhfM OS=Bacillus subtilis (strain 168) GN=yhfM PE=4 SV=1	1453	14998	62.43	DMLDIMNQGK	Oxidation (M)
50	1::sw|O07611|YHFM_BACSU	Uncharacterized protein YhfM OS=Bacillus subtilis (strain 168) GN=yhfM PE=4 SV=1	1453	14998	76.18	DMLDIMNQGK	Oxidation (M)
50	1::sw|O07611|YHFM_BACSU	Uncharacterized protein YhfM OS=Bacillus subtilis (strain 168) GN=yhfM PE=4 SV=1	1453	14998	19.62	DMLDIMNQGK	Oxidation (M)
50	1::sw|O07611|YHFM_BACSU	Uncharacterized protein YhfM OS=Bacillus subtilis (strain 168) GN=yhfM PE=4 SV=1	1453	14998	37.03	DMLDIMNQGK	Oxidation (M)
50	1::sw|O07611|YHFM_BACSU	Uncharacterized protein YhfM OS=Bacillus subtilis (strain 168) GN=yhfM PE=4 SV=1	1453	14998	66.5	DMLDIMNQGK	Oxidation (M)
50	1::sw|O07611|YHFM_BACSU	Uncharacterized protein YhfM OS=Bacillus subtilis (strain 168) GN=yhfM PE=4 SV=1	1453	14998	22.37	DMLDIMNQGK	Oxidation (M)
50	1::sw|O07611|YHFM_BACSU	Uncharacterized protein YhfM OS=Bacillus subtilis (strain 168) GN=yhfM PE=4 SV=1	1453	14998	38	DMLDIMNQGK	Oxidation (M)
50	1::sw|O07611|YHFM_BACSU	Uncharacterized protein YhfM OS=Bacillus subtilis (strain 168) GN=yhfM PE=4 SV=1	1453	14998	54.27	DMLDIMNQGK	Oxidation (M)
50	1::sw|O07611|YHFM_BACSU	Uncharacterized protein YhfM OS=Bacillus subtilis (strain 168) GN=yhfM PE=4 SV=1	1453	14998	43.14	DMLDIMNQGK	Oxidation (M)
50	1::sw|O07611|YHFM_BACSU	Uncharacterized protein YhfM OS=Bacillus subtilis (strain 168) GN=yhfM PE=4 SV=1	1453	14998	60.67	DMLDIMNQGK	Oxidation (M)
50	1::sw|O07611|YHFM_BACSU	Uncharacterized protein YhfM OS=Bacillus subtilis (strain 168) GN=yhfM PE=4 SV=1	1453	14998	53.34	DMLDIMNQGK	Oxidation (M)
50	1::sw|O07611|YHFM_BACSU	Uncharacterized protein YhfM OS=Bacillus subtilis (strain 168) GN=yhfM PE=4 SV=1	1453	14998	56.12	DMLDIMNQGK	Oxidation (M)
50	1::sw|O07611|YHFM_BACSU	Uncharacterized protein YhfM OS=Bacillus subtilis (strain 168) GN=yhfM PE=4 SV=1	1453	14998	43.42	DMLDIMNQGK	Oxidation (M)
50	1::sw|O07611|YHFM_BACSU	Uncharacterized protein YhfM OS=Bacillus subtilis (strain 168) GN=yhfM PE=4 SV=1	1453	14998	52.24	TSAPDYEGTIK
50	1::sw|O07611|YHFM_BACSU	Uncharacterized protein YhfM OS=Bacillus subtilis (strain 168) GN=yhfM PE=4 SV=1	1453	14998	38.67	TSAPDYEGTIK
50	1::sw|O07611|YHFM_BACSU	Uncharacterized protein YhfM OS=Bacillus subtilis (strain 168) GN=yhfM PE=4 SV=1	1453	14998	60.53	TSAPDYEGTIK
50	1::sw|O07611|YHFM_BACSU	Uncharacterized protein YhfM OS=Bacillus subtilis (strain 168) GN=yhfM PE=4 SV=1	1453	14998	94.38	TSAPDYEGTIK
50	1::sw|O07611|YHFM_BACSU	Uncharacterized protein YhfM OS=Bacillus subtilis (strain 168) GN=yhfM PE=4 SV=1	1453	14998	40.43	TSAPDYEGTIK
50	1::sw|O07611|YHFM_BACSU	Uncharacterized protein YhfM OS=Bacillus subtilis (strain 168) GN=yhfM PE=4 SV=1	1453	14998	52.47	TSAPDYEGTIK
50	1::sw|O07611|YHFM_BACSU	Uncharacterized protein YhfM OS=Bacillus subtilis (strain 168) GN=yhfM PE=4 SV=1	1453	14998	56.79	TSAPDYEGTIK
50	1::sw|O07611|YHFM_BACSU	Uncharacterized protein YhfM OS=Bacillus subtilis (strain 168) GN=yhfM PE=4 SV=1	1453	14998	45.91	TSAPDYEGTIK
50	1::sw|O07611|YHFM_BACSU	Uncharacterized protein YhfM OS=Bacillus subtilis (strain 168) GN=yhfM PE=4 SV=1	1453	14998	44.55	TSAPDYEGTIK
50	1::sw|O07611|YHFM_BACSU	Uncharacterized protein YhfM OS=Bacillus subtilis (strain 168) GN=yhfM PE=4 SV=1	1453	14998	63.08	TSAPDYEGTIK
50	1::sw|O07611|YHFM_BACSU	Uncharacterized protein YhfM OS=Bacillus subtilis (strain 168) GN=yhfM PE=4 SV=1	1453	14998	56.35	DMLDIMNQGK	2 Oxidation (M)
50	1::sw|O07611|YHFM_BACSU	Uncharacterized protein YhfM OS=Bacillus subtilis (strain 168) GN=yhfM PE=4 SV=1	1453	14998	57.77	DMLDIMNQGK	2 Oxidation (M)
50	1::sw|O07611|YHFM_BACSU	Uncharacterized protein YhfM OS=Bacillus subtilis (strain 168) GN=yhfM PE=4 SV=1	1453	14998	64.06	DMLDIMNQGK	2 Oxidation (M)
50	1::sw|O07611|YHFM_BACSU	Uncharacterized protein YhfM OS=Bacillus subtilis (strain 168) GN=yhfM PE=4 SV=1	1453	14998	18.89	LWIDGSQQAVFLK
50	1::sw|O07611|YHFM_BACSU	Uncharacterized protein YhfM OS=Bacillus subtilis (strain 168) GN=yhfM PE=4 SV=1	1453	14998	41.4	LWIDGSQQAVFLK
50	1::sw|O07611|YHFM_BACSU	Uncharacterized protein YhfM OS=Bacillus subtilis (strain 168) GN=yhfM PE=4 SV=1	1453	14998	91.33	LWIDGSQQAVFLK
50	1::sw|O07611|YHFM_BACSU	Uncharacterized protein YhfM OS=Bacillus subtilis (strain 168) GN=yhfM PE=4 SV=1	1453	14998	100.57	LWIDGSQQAVFLK
50	1::sw|O07611|YHFM_BACSU	Uncharacterized protein YhfM OS=Bacillus subtilis (strain 168) GN=yhfM PE=4 SV=1	1453	14998	57.77	LWIDGSQQAVFLK
50	1::sw|O07611|YHFM_BACSU	Uncharacterized protein YhfM OS=Bacillus subtilis (strain 168) GN=yhfM PE=4 SV=1	1453	14998	65.59	LWIDGSQQAVFLK
50	1::sw|O07611|YHFM_BACSU	Uncharacterized protein YhfM OS=Bacillus subtilis (strain 168) GN=yhfM PE=4 SV=1	1453	14998	54.37	SGDVYQSVDADLITLSSSGQEDIEIEK
50	1::sw|O07611|YHFM_BACSU	Uncharacterized protein YhfM OS=Bacillus subtilis (strain 168) GN=yhfM PE=4 SV=1	1453	14998	76.94	SGDVYQSVDADLITLSSSGQEDIEIEKR
552	1::sw|O07615|YHFP_BACSU	Putative quinone oxidoreductase YhfP OS=Bacillus subtilis (strain 168) GN=yhfP PE=1 SV=1	76	34792	24.74	QLGASEVISR
552	1::sw|O07615|YHFP_BACSU	Putative quinone oxidoreductase YhfP OS=Bacillus subtilis (strain 168) GN=yhfP PE=1 SV=1	76	34792	52.49	NADDVSVHVK
552	1::sw|O07615|YHFP_BACSU	Putative quinone oxidoreductase YhfP OS=Bacillus subtilis (strain 168) GN=yhfP PE=1 SV=1	76	34792	39	GYDVVASTGNR
422	1::sw|O07622|YHFW_BACSU	Putative Rieske 2Fe-2S iron-sulfur protein YhfW OS=Bacillus subtilis (strain 168) GN=yhfW PE=3 SV=1	139	57587	27.59	LILFSGVSHK
422	1::sw|O07622|YHFW_BACSU	Putative Rieske 2Fe-2S iron-sulfur protein YhfW OS=Bacillus subtilis (strain 168) GN=yhfW PE=3 SV=1	139	57587	18.55	IHTEHEAYTK
422	1::sw|O07622|YHFW_BACSU	Putative Rieske 2Fe-2S iron-sulfur protein YhfW OS=Bacillus subtilis (strain 168) GN=yhfW PE=3 SV=1	139	57587	27.08	ENPYESIFTPSR
422	1::sw|O07622|YHFW_BACSU	Putative Rieske 2Fe-2S iron-sulfur protein YhfW OS=Bacillus subtilis (strain 168) GN=yhfW PE=3 SV=1	139	57587	51.48	NQAQFHPLQYLK
422	1::sw|O07622|YHFW_BACSU	Putative Rieske 2Fe-2S iron-sulfur protein YhfW OS=Bacillus subtilis (strain 168) GN=yhfW PE=3 SV=1	139	57587	62.48	LYYEANQNAIDYIK
422	1::sw|O07622|YHFW_BACSU	Putative Rieske 2Fe-2S iron-sulfur protein YhfW OS=Bacillus subtilis (strain 168) GN=yhfW PE=3 SV=1	139	57587	19.01	LYYEANQNAIDYIK
422	1::sw|O07622|YHFW_BACSU	Putative Rieske 2Fe-2S iron-sulfur protein YhfW OS=Bacillus subtilis (strain 168) GN=yhfW PE=3 SV=1	139	57587	45.9	FIICCSHFPFYDGGGLYAAR
220	1::sw|O07631|TYPA_BACSU	GTP-binding protein TypA/BipA homolog OS=Bacillus subtilis (strain 168) GN=typA PE=3 SV=1	331	68574	34.67	ANEQVAER
220	1::sw|O07631|TYPA_BACSU	GTP-binding protein TypA/BipA homolog OS=Bacillus subtilis (strain 168) GN=typA PE=3 SV=1	331	68574	64.62	VGQQVSLMK
220	1::sw|O07631|TYPA_BACSU	GTP-binding protein TypA/BipA homolog OS=Bacillus subtilis (strain 168) GN=typA PE=3 SV=1	331	68574	62.54	AMDSNDLER
220	1::sw|O07631|TYPA_BACSU	GTP-binding protein TypA/BipA homolog OS=Bacillus subtilis (strain 168) GN=typA PE=3 SV=1	331	68574	58.99	DNDLVVNVSK
220	1::sw|O07631|TYPA_BACSU	GTP-binding protein TypA/BipA homolog OS=Bacillus subtilis (strain 168) GN=typA PE=3 SV=1	331	68574	39.62	ATSYGIQGIEDR
220	1::sw|O07631|TYPA_BACSU	GTP-binding protein TypA/BipA homolog OS=Bacillus subtilis (strain 168) GN=typA PE=3 SV=1	331	68574	60.48	LQSQLQTDVSLR
220	1::sw|O07631|TYPA_BACSU	GTP-binding protein TypA/BipA homolog OS=Bacillus subtilis (strain 168) GN=typA PE=3 SV=1	331	68574	71.05	ALEQNLNPVVVVNK
220	1::sw|O07631|TYPA_BACSU	GTP-binding protein TypA/BipA homolog OS=Bacillus subtilis (strain 168) GN=typA PE=3 SV=1	331	68574	66.92	GLIGYSTEFLSLTR
220	1::sw|O07631|TYPA_BACSU	GTP-binding protein TypA/BipA homolog OS=Bacillus subtilis (strain 168) GN=typA PE=3 SV=1	331	68574	42.28	VEPTASPDAWVVSGR
39	1::sw|O07634|YLAJ_BACSU	Uncharacterized lipoprotein YlaJ OS=Bacillus subtilis (strain 168) GN=ylaJ PE=4 SV=1	1827	23427	30.48	SKVETIK
39	1::sw|O07634|YLAJ_BACSU	Uncharacterized lipoprotein YlaJ OS=Bacillus subtilis (strain 168) GN=ylaJ PE=4 SV=1	1827	23427	21.41	SKVETIK
39	1::sw|O07634|YLAJ_BACSU	Uncharacterized lipoprotein YlaJ OS=Bacillus subtilis (strain 168) GN=ylaJ PE=4 SV=1	1827	23427	36.71	SKVETIK
39	1::sw|O07634|YLAJ_BACSU	Uncharacterized lipoprotein YlaJ OS=Bacillus subtilis (strain 168) GN=ylaJ PE=4 SV=1	1827	23427	24.95	SKVETIK
39	1::sw|O07634|YLAJ_BACSU	Uncharacterized lipoprotein YlaJ OS=Bacillus subtilis (strain 168) GN=ylaJ PE=4 SV=1	1827	23427	19.14	SKVETIK
39	1::sw|O07634|YLAJ_BACSU	Uncharacterized lipoprotein YlaJ OS=Bacillus subtilis (strain 168) GN=ylaJ PE=4 SV=1	1827	23427	40.28	SKVETIK
39	1::sw|O07634|YLAJ_BACSU	Uncharacterized lipoprotein YlaJ OS=Bacillus subtilis (strain 168) GN=ylaJ PE=4 SV=1	1827	23427	38.75	SKVETIK
39	1::sw|O07634|YLAJ_BACSU	Uncharacterized lipoprotein YlaJ OS=Bacillus subtilis (strain 168) GN=ylaJ PE=4 SV=1	1827	23427	38.4	SKVETIK
39	1::sw|O07634|YLAJ_BACSU	Uncharacterized lipoprotein YlaJ OS=Bacillus subtilis (strain 168) GN=ylaJ PE=4 SV=1	1827	23427	39.71	SKVETIK
39	1::sw|O07634|YLAJ_BACSU	Uncharacterized lipoprotein YlaJ OS=Bacillus subtilis (strain 168) GN=ylaJ PE=4 SV=1	1827	23427	28.89	SKVETIK
39	1::sw|O07634|YLAJ_BACSU	Uncharacterized lipoprotein YlaJ OS=Bacillus subtilis (strain 168) GN=ylaJ PE=4 SV=1	1827	23427	29.22	SKVETIK
39	1::sw|O07634|YLAJ_BACSU	Uncharacterized lipoprotein YlaJ OS=Bacillus subtilis (strain 168) GN=ylaJ PE=4 SV=1	1827	23427	32.78	YSVAQALK
39	1::sw|O07634|YLAJ_BACSU	Uncharacterized lipoprotein YlaJ OS=Bacillus subtilis (strain 168) GN=ylaJ PE=4 SV=1	1827	23427	37.91	YSVAQALK
39	1::sw|O07634|YLAJ_BACSU	Uncharacterized lipoprotein YlaJ OS=Bacillus subtilis (strain 168) GN=ylaJ PE=4 SV=1	1827	23427	42.72	YSVAQALK
39	1::sw|O07634|YLAJ_BACSU	Uncharacterized lipoprotein YlaJ OS=Bacillus subtilis (strain 168) GN=ylaJ PE=4 SV=1	1827	23427	56.12	YSVAQALK
39	1::sw|O07634|YLAJ_BACSU	Uncharacterized lipoprotein YlaJ OS=Bacillus subtilis (strain 168) GN=ylaJ PE=4 SV=1	1827	23427	40.74	YSVAQALK
39	1::sw|O07634|YLAJ_BACSU	Uncharacterized lipoprotein YlaJ OS=Bacillus subtilis (strain 168) GN=ylaJ PE=4 SV=1	1827	23427	56.27	YSVAQALK
39	1::sw|O07634|YLAJ_BACSU	Uncharacterized lipoprotein YlaJ OS=Bacillus subtilis (strain 168) GN=ylaJ PE=4 SV=1	1827	23427	51.58	YSVAQALK
39	1::sw|O07634|YLAJ_BACSU	Uncharacterized lipoprotein YlaJ OS=Bacillus subtilis (strain 168) GN=ylaJ PE=4 SV=1	1827	23427	39.69	YSVAQALK
39	1::sw|O07634|YLAJ_BACSU	Uncharacterized lipoprotein YlaJ OS=Bacillus subtilis (strain 168) GN=ylaJ PE=4 SV=1	1827	23427	59.25	YSVAQALK
39	1::sw|O07634|YLAJ_BACSU	Uncharacterized lipoprotein YlaJ OS=Bacillus subtilis (strain 168) GN=ylaJ PE=4 SV=1	1827	23427	20.77	YSVAQALK
39	1::sw|O07634|YLAJ_BACSU	Uncharacterized lipoprotein YlaJ OS=Bacillus subtilis (strain 168) GN=ylaJ PE=4 SV=1	1827	23427	29.09	YSVAQALK
39	1::sw|O07634|YLAJ_BACSU	Uncharacterized lipoprotein YlaJ OS=Bacillus subtilis (strain 168) GN=ylaJ PE=4 SV=1	1827	23427	54.63	YSVAQALK
39	1::sw|O07634|YLAJ_BACSU	Uncharacterized lipoprotein YlaJ OS=Bacillus subtilis (strain 168) GN=ylaJ PE=4 SV=1	1827	23427	53.52	YSVAQALK
39	1::sw|O07634|YLAJ_BACSU	Uncharacterized lipoprotein YlaJ OS=Bacillus subtilis (strain 168) GN=ylaJ PE=4 SV=1	1827	23427	51.94	YSVAQALK
39	1::sw|O07634|YLAJ_BACSU	Uncharacterized lipoprotein YlaJ OS=Bacillus subtilis (strain 168) GN=ylaJ PE=4 SV=1	1827	23427	43.4	YSVAQALK
39	1::sw|O07634|YLAJ_BACSU	Uncharacterized lipoprotein YlaJ OS=Bacillus subtilis (strain 168) GN=ylaJ PE=4 SV=1	1827	23427	51.31	YSVAQALK
39	1::sw|O07634|YLAJ_BACSU	Uncharacterized lipoprotein YlaJ OS=Bacillus subtilis (strain 168) GN=ylaJ PE=4 SV=1	1827	23427	60.47	YSVAQALK
39	1::sw|O07634|YLAJ_BACSU	Uncharacterized lipoprotein YlaJ OS=Bacillus subtilis (strain 168) GN=ylaJ PE=4 SV=1	1827	23427	54.39	YSVAQALK
39	1::sw|O07634|YLAJ_BACSU	Uncharacterized lipoprotein YlaJ OS=Bacillus subtilis (strain 168) GN=ylaJ PE=4 SV=1	1827	23427	23.05	YSVAQALK
39	1::sw|O07634|YLAJ_BACSU	Uncharacterized lipoprotein YlaJ OS=Bacillus subtilis (strain 168) GN=ylaJ PE=4 SV=1	1827	23427	20.83	YSVAQALK
39	1::sw|O07634|YLAJ_BACSU	Uncharacterized lipoprotein YlaJ OS=Bacillus subtilis (strain 168) GN=ylaJ PE=4 SV=1	1827	23427	30.01	HLVSVAEK
39	1::sw|O07634|YLAJ_BACSU	Uncharacterized lipoprotein YlaJ OS=Bacillus subtilis (strain 168) GN=ylaJ PE=4 SV=1	1827	23427	50.24	HLVSVAEK
39	1::sw|O07634|YLAJ_BACSU	Uncharacterized lipoprotein YlaJ OS=Bacillus subtilis (strain 168) GN=ylaJ PE=4 SV=1	1827	23427	33.32	HLVSVAEK
39	1::sw|O07634|YLAJ_BACSU	Uncharacterized lipoprotein YlaJ OS=Bacillus subtilis (strain 168) GN=ylaJ PE=4 SV=1	1827	23427	40.18	HLVSVAEK
39	1::sw|O07634|YLAJ_BACSU	Uncharacterized lipoprotein YlaJ OS=Bacillus subtilis (strain 168) GN=ylaJ PE=4 SV=1	1827	23427	21.78	HLVSVAEK
39	1::sw|O07634|YLAJ_BACSU	Uncharacterized lipoprotein YlaJ OS=Bacillus subtilis (strain 168) GN=ylaJ PE=4 SV=1	1827	23427	18.32	HLVSVAEK
39	1::sw|O07634|YLAJ_BACSU	Uncharacterized lipoprotein YlaJ OS=Bacillus subtilis (strain 168) GN=ylaJ PE=4 SV=1	1827	23427	39.41	HLVSVAEK
39	1::sw|O07634|YLAJ_BACSU	Uncharacterized lipoprotein YlaJ OS=Bacillus subtilis (strain 168) GN=ylaJ PE=4 SV=1	1827	23427	38.89	HLVSVAEK
39	1::sw|O07634|YLAJ_BACSU	Uncharacterized lipoprotein YlaJ OS=Bacillus subtilis (strain 168) GN=ylaJ PE=4 SV=1	1827	23427	19.25	HLVSVAEK
39	1::sw|O07634|YLAJ_BACSU	Uncharacterized lipoprotein YlaJ OS=Bacillus subtilis (strain 168) GN=ylaJ PE=4 SV=1	1827	23427	29.58	HLVSVAEK
39	1::sw|O07634|YLAJ_BACSU	Uncharacterized lipoprotein YlaJ OS=Bacillus subtilis (strain 168) GN=ylaJ PE=4 SV=1	1827	23427	37.64	HLVSVAEK
39	1::sw|O07634|YLAJ_BACSU	Uncharacterized lipoprotein YlaJ OS=Bacillus subtilis (strain 168) GN=ylaJ PE=4 SV=1	1827	23427	44.96	HLVSVAEK
39	1::sw|O07634|YLAJ_BACSU	Uncharacterized lipoprotein YlaJ OS=Bacillus subtilis (strain 168) GN=ylaJ PE=4 SV=1	1827	23427	49.46	QQNDQLNR
39	1::sw|O07634|YLAJ_BACSU	Uncharacterized lipoprotein YlaJ OS=Bacillus subtilis (strain 168) GN=ylaJ PE=4 SV=1	1827	23427	38.57	QQNDQLNR
39	1::sw|O07634|YLAJ_BACSU	Uncharacterized lipoprotein YlaJ OS=Bacillus subtilis (strain 168) GN=ylaJ PE=4 SV=1	1827	23427	29.56	QQNDQLNR
39	1::sw|O07634|YLAJ_BACSU	Uncharacterized lipoprotein YlaJ OS=Bacillus subtilis (strain 168) GN=ylaJ PE=4 SV=1	1827	23427	25.54	QQNDQLNR
39	1::sw|O07634|YLAJ_BACSU	Uncharacterized lipoprotein YlaJ OS=Bacillus subtilis (strain 168) GN=ylaJ PE=4 SV=1	1827	23427	30.44	QQNDQLNR
39	1::sw|O07634|YLAJ_BACSU	Uncharacterized lipoprotein YlaJ OS=Bacillus subtilis (strain 168) GN=ylaJ PE=4 SV=1	1827	23427	19.11	QQETKPIHVK
39	1::sw|O07634|YLAJ_BACSU	Uncharacterized lipoprotein YlaJ OS=Bacillus subtilis (strain 168) GN=ylaJ PE=4 SV=1	1827	23427	21.72	QQETKPIHVK
39	1::sw|O07634|YLAJ_BACSU	Uncharacterized lipoprotein YlaJ OS=Bacillus subtilis (strain 168) GN=ylaJ PE=4 SV=1	1827	23427	28.94	YSVAQALKNDR
39	1::sw|O07634|YLAJ_BACSU	Uncharacterized lipoprotein YlaJ OS=Bacillus subtilis (strain 168) GN=ylaJ PE=4 SV=1	1827	23427	71.89	YSVAQALKNDR
39	1::sw|O07634|YLAJ_BACSU	Uncharacterized lipoprotein YlaJ OS=Bacillus subtilis (strain 168) GN=ylaJ PE=4 SV=1	1827	23427	31.93	YSVAQALKNDR
39	1::sw|O07634|YLAJ_BACSU	Uncharacterized lipoprotein YlaJ OS=Bacillus subtilis (strain 168) GN=ylaJ PE=4 SV=1	1827	23427	39.13	YSVAQALKNDR
39	1::sw|O07634|YLAJ_BACSU	Uncharacterized lipoprotein YlaJ OS=Bacillus subtilis (strain 168) GN=ylaJ PE=4 SV=1	1827	23427	61.69	HLVSVAEKNPDVK
39	1::sw|O07634|YLAJ_BACSU	Uncharacterized lipoprotein YlaJ OS=Bacillus subtilis (strain 168) GN=ylaJ PE=4 SV=1	1827	23427	34.26	HLVSVAEKNPDVK
39	1::sw|O07634|YLAJ_BACSU	Uncharacterized lipoprotein YlaJ OS=Bacillus subtilis (strain 168) GN=ylaJ PE=4 SV=1	1827	23427	50.77	HLVSVAEKNPDVK
39	1::sw|O07634|YLAJ_BACSU	Uncharacterized lipoprotein YlaJ OS=Bacillus subtilis (strain 168) GN=ylaJ PE=4 SV=1	1827	23427	69.18	YGANAVVIADPDTVSR
39	1::sw|O07634|YLAJ_BACSU	Uncharacterized lipoprotein YlaJ OS=Bacillus subtilis (strain 168) GN=ylaJ PE=4 SV=1	1827	23427	71.16	YGANAVVIADPDTVSR
39	1::sw|O07634|YLAJ_BACSU	Uncharacterized lipoprotein YlaJ OS=Bacillus subtilis (strain 168) GN=ylaJ PE=4 SV=1	1827	23427	90.6	YGANAVVIADPDTVSR
39	1::sw|O07634|YLAJ_BACSU	Uncharacterized lipoprotein YlaJ OS=Bacillus subtilis (strain 168) GN=ylaJ PE=4 SV=1	1827	23427	60.85	YGANAVVIADPDTVSR
39	1::sw|O07634|YLAJ_BACSU	Uncharacterized lipoprotein YlaJ OS=Bacillus subtilis (strain 168) GN=ylaJ PE=4 SV=1	1827	23427	54.08	YGANAVVIADPDTVSR
39	1::sw|O07634|YLAJ_BACSU	Uncharacterized lipoprotein YlaJ OS=Bacillus subtilis (strain 168) GN=ylaJ PE=4 SV=1	1827	23427	70.99	YGANAVVIADPDTVSR
39	1::sw|O07634|YLAJ_BACSU	Uncharacterized lipoprotein YlaJ OS=Bacillus subtilis (strain 168) GN=ylaJ PE=4 SV=1	1827	23427	60.94	YGANAVVIADPDTVSR
39	1::sw|O07634|YLAJ_BACSU	Uncharacterized lipoprotein YlaJ OS=Bacillus subtilis (strain 168) GN=ylaJ PE=4 SV=1	1827	23427	75.04	YGANAVVIADPDTVSR
39	1::sw|O07634|YLAJ_BACSU	Uncharacterized lipoprotein YlaJ OS=Bacillus subtilis (strain 168) GN=ylaJ PE=4 SV=1	1827	23427	78.51	YGANAVVIADPDTVSR
39	1::sw|O07634|YLAJ_BACSU	Uncharacterized lipoprotein YlaJ OS=Bacillus subtilis (strain 168) GN=ylaJ PE=4 SV=1	1827	23427	61.3	YGANAVVIADPDTVSR
39	1::sw|O07634|YLAJ_BACSU	Uncharacterized lipoprotein YlaJ OS=Bacillus subtilis (strain 168) GN=ylaJ PE=4 SV=1	1827	23427	53.68	YGANAVVIADPDTVSR
39	1::sw|O07634|YLAJ_BACSU	Uncharacterized lipoprotein YlaJ OS=Bacillus subtilis (strain 168) GN=ylaJ PE=4 SV=1	1827	23427	62.33	YGANAVVIADPDTVSR
39	1::sw|O07634|YLAJ_BACSU	Uncharacterized lipoprotein YlaJ OS=Bacillus subtilis (strain 168) GN=ylaJ PE=4 SV=1	1827	23427	52.44	YGANAVVIADPDTVSR
39	1::sw|O07634|YLAJ_BACSU	Uncharacterized lipoprotein YlaJ OS=Bacillus subtilis (strain 168) GN=ylaJ PE=4 SV=1	1827	23427	51.18	YGANAVVIADPDTVSR
39	1::sw|O07634|YLAJ_BACSU	Uncharacterized lipoprotein YlaJ OS=Bacillus subtilis (strain 168) GN=ylaJ PE=4 SV=1	1827	23427	82.03	YGANAVVIADPDTVSR
39	1::sw|O07634|YLAJ_BACSU	Uncharacterized lipoprotein YlaJ OS=Bacillus subtilis (strain 168) GN=ylaJ PE=4 SV=1	1827	23427	71.19	YGANAVVIADPDTVSR
39	1::sw|O07634|YLAJ_BACSU	Uncharacterized lipoprotein YlaJ OS=Bacillus subtilis (strain 168) GN=ylaJ PE=4 SV=1	1827	23427	21.12	YGANAVVIADPDTVSR
39	1::sw|O07634|YLAJ_BACSU	Uncharacterized lipoprotein YlaJ OS=Bacillus subtilis (strain 168) GN=ylaJ PE=4 SV=1	1827	23427	47.17	VLPEVPNDVIDNEDEPQTK
39	1::sw|O07634|YLAJ_BACSU	Uncharacterized lipoprotein YlaJ OS=Bacillus subtilis (strain 168) GN=ylaJ PE=4 SV=1	1827	23427	49.65	VLPEVPNDVIDNEDEPQTK
39	1::sw|O07634|YLAJ_BACSU	Uncharacterized lipoprotein YlaJ OS=Bacillus subtilis (strain 168) GN=ylaJ PE=4 SV=1	1827	23427	49.7	VLPEVPNDVIDNEDEPQTK
39	1::sw|O07634|YLAJ_BACSU	Uncharacterized lipoprotein YlaJ OS=Bacillus subtilis (strain 168) GN=ylaJ PE=4 SV=1	1827	23427	44.21	VLPEVPNDVIDNEDEPQTK
39	1::sw|O07634|YLAJ_BACSU	Uncharacterized lipoprotein YlaJ OS=Bacillus subtilis (strain 168) GN=ylaJ PE=4 SV=1	1827	23427	38.26	VLPEVPNDVIDNEDEPQTK
39	1::sw|O07634|YLAJ_BACSU	Uncharacterized lipoprotein YlaJ OS=Bacillus subtilis (strain 168) GN=ylaJ PE=4 SV=1	1827	23427	68.22	EISEGHPVTGILDELAAIVGR
39	1::sw|O07634|YLAJ_BACSU	Uncharacterized lipoprotein YlaJ OS=Bacillus subtilis (strain 168) GN=ylaJ PE=4 SV=1	1827	23427	20.47	EISEGHPVTGILDELAAIVGR
39	1::sw|O07634|YLAJ_BACSU	Uncharacterized lipoprotein YlaJ OS=Bacillus subtilis (strain 168) GN=ylaJ PE=4 SV=1	1827	23427	33.73	EISEGHPVTGILDELAAIVGR
39	1::sw|O07634|YLAJ_BACSU	Uncharacterized lipoprotein YlaJ OS=Bacillus subtilis (strain 168) GN=ylaJ PE=4 SV=1	1827	23427	39.94	EISEGHPVTGILDELAAIVGR
39	1::sw|O07634|YLAJ_BACSU	Uncharacterized lipoprotein YlaJ OS=Bacillus subtilis (strain 168) GN=ylaJ PE=4 SV=1	1827	23427	29.43	EISEGHPVTGILDELAAIVGR
39	1::sw|O07634|YLAJ_BACSU	Uncharacterized lipoprotein YlaJ OS=Bacillus subtilis (strain 168) GN=ylaJ PE=4 SV=1	1827	23427	23.03	EISEGHPVTGILDELAAIVGR
39	1::sw|O07634|YLAJ_BACSU	Uncharacterized lipoprotein YlaJ OS=Bacillus subtilis (strain 168) GN=ylaJ PE=4 SV=1	1827	23427	29.69	EISEGHPVTGILDELAAIVGR
39	1::sw|O07634|YLAJ_BACSU	Uncharacterized lipoprotein YlaJ OS=Bacillus subtilis (strain 168) GN=ylaJ PE=4 SV=1	1827	23427	35.58	EISEGHPVTGILDELAAIVGR
218	1::sw|O07637|GLSA2_BACSU	Glutaminase 2 OS=Bacillus subtilis (strain 168) GN=glsA2 PE=1 SV=1	333	34389	75.55	LDYLLSFIR
218	1::sw|O07637|GLSA2_BACSU	Glutaminase 2 OS=Bacillus subtilis (strain 168) GN=glsA2 PE=1 SV=1	333	34389	56.38	GEVASYIPALAK
218	1::sw|O07637|GLSA2_BACSU	Glutaminase 2 OS=Bacillus subtilis (strain 168) GN=glsA2 PE=1 SV=1	333	34389	38.47	HPETGEQVISK
218	1::sw|O07637|GLSA2_BACSU	Glutaminase 2 OS=Bacillus subtilis (strain 168) GN=glsA2 PE=1 SV=1	333	34389	36.68	HPETGEQVISK
218	1::sw|O07637|GLSA2_BACSU	Glutaminase 2 OS=Bacillus subtilis (strain 168) GN=glsA2 PE=1 SV=1	333	34389	47.41	LLEIMSEMYR
218	1::sw|O07637|GLSA2_BACSU	Glutaminase 2 OS=Bacillus subtilis (strain 168) GN=glsA2 PE=1 SV=1	333	34389	61.09	LTNNQEITYCR
218	1::sw|O07637|GLSA2_BACSU	Glutaminase 2 OS=Bacillus subtilis (strain 168) GN=glsA2 PE=1 SV=1	333	34389	36.16	ERLDYLLSFIR
218	1::sw|O07637|GLSA2_BACSU	Glutaminase 2 OS=Bacillus subtilis (strain 168) GN=glsA2 PE=1 SV=1	333	34389	86.84	VLSLALVLMEYGK
218	1::sw|O07637|GLSA2_BACSU	Glutaminase 2 OS=Bacillus subtilis (strain 168) GN=glsA2 PE=1 SV=1	333	34389	63.79	EVAESEYSTSMINR
54	1::sw|O08394|CYPD_BACSU	Probable bifunctional P-450/NADPH-P450 reductase 1 OS=Bacillus subtilis (strain 168) GN=cypD PE=3 SV=1	1408	119850	22.6	FNSYYR
54	1::sw|O08394|CYPD_BACSU	Probable bifunctional P-450/NADPH-P450 reductase 1 OS=Bacillus subtilis (strain 168) GN=cypD PE=3 SV=1	1408	119850	35.54	GLGESPLAR
54	1::sw|O08394|CYPD_BACSU	Probable bifunctional P-450/NADPH-P450 reductase 1 OS=Bacillus subtilis (strain 168) GN=cypD PE=3 SV=1	1408	119850	22.32	GLGESPLAR
54	1::sw|O08394|CYPD_BACSU	Probable bifunctional P-450/NADPH-P450 reductase 1 OS=Bacillus subtilis (strain 168) GN=cypD PE=3 SV=1	1408	119850	25.13	SAGHLPLGR
54	1::sw|O08394|CYPD_BACSU	Probable bifunctional P-450/NADPH-P450 reductase 1 OS=Bacillus subtilis (strain 168) GN=cypD PE=3 SV=1	1408	119850	47.84	FPITTNDR
54	1::sw|O08394|CYPD_BACSU	Probable bifunctional P-450/NADPH-P450 reductase 1 OS=Bacillus subtilis (strain 168) GN=cypD PE=3 SV=1	1408	119850	61.96	MILNESLR
54	1::sw|O08394|CYPD_BACSU	Probable bifunctional P-450/NADPH-P450 reductase 1 OS=Bacillus subtilis (strain 168) GN=cypD PE=3 SV=1	1408	119850	31.22	LYVCGDGSK
54	1::sw|O08394|CYPD_BACSU	Probable bifunctional P-450/NADPH-P450 reductase 1 OS=Bacillus subtilis (strain 168) GN=cypD PE=3 SV=1	1408	119850	30.82	KAYEEVDR
54	1::sw|O08394|CYPD_BACSU	Probable bifunctional P-450/NADPH-P450 reductase 1 OS=Bacillus subtilis (strain 168) GN=cypD PE=3 SV=1	1408	119850	38.27	ELQSADSDR
54	1::sw|O08394|CYPD_BACSU	Probable bifunctional P-450/NADPH-P450 reductase 1 OS=Bacillus subtilis (strain 168) GN=cypD PE=3 SV=1	1408	119850	40.42	ELQSADSDR
54	1::sw|O08394|CYPD_BACSU	Probable bifunctional P-450/NADPH-P450 reductase 1 OS=Bacillus subtilis (strain 168) GN=cypD PE=3 SV=1	1408	119850	30.74	ELQSADSDR
54	1::sw|O08394|CYPD_BACSU	Probable bifunctional P-450/NADPH-P450 reductase 1 OS=Bacillus subtilis (strain 168) GN=cypD PE=3 SV=1	1408	119850	20.78	ELQSADSDR
54	1::sw|O08394|CYPD_BACSU	Probable bifunctional P-450/NADPH-P450 reductase 1 OS=Bacillus subtilis (strain 168) GN=cypD PE=3 SV=1	1408	119850	35.13	QASITVGVVR
54	1::sw|O08394|CYPD_BACSU	Probable bifunctional P-450/NADPH-P450 reductase 1 OS=Bacillus subtilis (strain 168) GN=cypD PE=3 SV=1	1408	119850	71.17	GVASNDLAER
54	1::sw|O08394|CYPD_BACSU	Probable bifunctional P-450/NADPH-P450 reductase 1 OS=Bacillus subtilis (strain 168) GN=cypD PE=3 SV=1	1408	119850	73.67	GVASNDLAER
54	1::sw|O08394|CYPD_BACSU	Probable bifunctional P-450/NADPH-P450 reductase 1 OS=Bacillus subtilis (strain 168) GN=cypD PE=3 SV=1	1408	119850	61.55	GVASNDLAER
54	1::sw|O08394|CYPD_BACSU	Probable bifunctional P-450/NADPH-P450 reductase 1 OS=Bacillus subtilis (strain 168) GN=cypD PE=3 SV=1	1408	119850	66.15	STLSLQFVR
54	1::sw|O08394|CYPD_BACSU	Probable bifunctional P-450/NADPH-P450 reductase 1 OS=Bacillus subtilis (strain 168) GN=cypD PE=3 SV=1	1408	119850	36.15	YYSISSSPR
54	1::sw|O08394|CYPD_BACSU	Probable bifunctional P-450/NADPH-P450 reductase 1 OS=Bacillus subtilis (strain 168) GN=cypD PE=3 SV=1	1408	119850	33.75	YYSISSSPR
54	1::sw|O08394|CYPD_BACSU	Probable bifunctional P-450/NADPH-P450 reductase 1 OS=Bacillus subtilis (strain 168) GN=cypD PE=3 SV=1	1408	119850	50.85	ISMLDLLEK
54	1::sw|O08394|CYPD_BACSU	Probable bifunctional P-450/NADPH-P450 reductase 1 OS=Bacillus subtilis (strain 168) GN=cypD PE=3 SV=1	1408	119850	45.96	VLTDAAPTYK
54	1::sw|O08394|CYPD_BACSU	Probable bifunctional P-450/NADPH-P450 reductase 1 OS=Bacillus subtilis (strain 168) GN=cypD PE=3 SV=1	1408	119850	41.23	VLTDAAPTYK
54	1::sw|O08394|CYPD_BACSU	Probable bifunctional P-450/NADPH-P450 reductase 1 OS=Bacillus subtilis (strain 168) GN=cypD PE=3 SV=1	1408	119850	51.06	VLTDAAPTYK
54	1::sw|O08394|CYPD_BACSU	Probable bifunctional P-450/NADPH-P450 reductase 1 OS=Bacillus subtilis (strain 168) GN=cypD PE=3 SV=1	1408	119850	45.84	FIDEQLAEK
54	1::sw|O08394|CYPD_BACSU	Probable bifunctional P-450/NADPH-P450 reductase 1 OS=Bacillus subtilis (strain 168) GN=cypD PE=3 SV=1	1408	119850	55.88	FIDEQLAEK
54	1::sw|O08394|CYPD_BACSU	Probable bifunctional P-450/NADPH-P450 reductase 1 OS=Bacillus subtilis (strain 168) GN=cypD PE=3 SV=1	1408	119850	26.78	FIDEQLAEK
54	1::sw|O08394|CYPD_BACSU	Probable bifunctional P-450/NADPH-P450 reductase 1 OS=Bacillus subtilis (strain 168) GN=cypD PE=3 SV=1	1408	119850	26.46	DAEEFRPER
54	1::sw|O08394|CYPD_BACSU	Probable bifunctional P-450/NADPH-P450 reductase 1 OS=Bacillus subtilis (strain 168) GN=cypD PE=3 SV=1	1408	119850	24.14	HLQDTGMYAK
54	1::sw|O08394|CYPD_BACSU	Probable bifunctional P-450/NADPH-P450 reductase 1 OS=Bacillus subtilis (strain 168) GN=cypD PE=3 SV=1	1408	119850	54.13	MAPDVEAALQK
54	1::sw|O08394|CYPD_BACSU	Probable bifunctional P-450/NADPH-P450 reductase 1 OS=Bacillus subtilis (strain 168) GN=cypD PE=3 SV=1	1408	119850	54.77	MAPDVEAALQK
54	1::sw|O08394|CYPD_BACSU	Probable bifunctional P-450/NADPH-P450 reductase 1 OS=Bacillus subtilis (strain 168) GN=cypD PE=3 SV=1	1408	119850	27.51	ISVLIPQLHR
54	1::sw|O08394|CYPD_BACSU	Probable bifunctional P-450/NADPH-P450 reductase 1 OS=Bacillus subtilis (strain 168) GN=cypD PE=3 SV=1	1408	119850	18.36	GTDQVTLSASGR
54	1::sw|O08394|CYPD_BACSU	Probable bifunctional P-450/NADPH-P450 reductase 1 OS=Bacillus subtilis (strain 168) GN=cypD PE=3 SV=1	1408	119850	61.01	GTDQVTLSASGR
54	1::sw|O08394|CYPD_BACSU	Probable bifunctional P-450/NADPH-P450 reductase 1 OS=Bacillus subtilis (strain 168) GN=cypD PE=3 SV=1	1408	119850	41.59	QAGDDVVMFIR
54	1::sw|O08394|CYPD_BACSU	Probable bifunctional P-450/NADPH-P450 reductase 1 OS=Bacillus subtilis (strain 168) GN=cypD PE=3 SV=1	1408	119850	68.16	MVDIAVQLIQK
54	1::sw|O08394|CYPD_BACSU	Probable bifunctional P-450/NADPH-P450 reductase 1 OS=Bacillus subtilis (strain 168) GN=cypD PE=3 SV=1	1408	119850	20.93	MVDIAVQLIQK
54	1::sw|O08394|CYPD_BACSU	Probable bifunctional P-450/NADPH-P450 reductase 1 OS=Bacillus subtilis (strain 168) GN=cypD PE=3 SV=1	1408	119850	59.1	ELADTASLHGVR
54	1::sw|O08394|CYPD_BACSU	Probable bifunctional P-450/NADPH-P450 reductase 1 OS=Bacillus subtilis (strain 168) GN=cypD PE=3 SV=1	1408	119850	49.08	DGIVTVHTAFSR
54	1::sw|O08394|CYPD_BACSU	Probable bifunctional P-450/NADPH-P450 reductase 1 OS=Bacillus subtilis (strain 168) GN=cypD PE=3 SV=1	1408	119850	41.23	YEACDMPFER
54	1::sw|O08394|CYPD_BACSU	Probable bifunctional P-450/NADPH-P450 reductase 1 OS=Bacillus subtilis (strain 168) GN=cypD PE=3 SV=1	1408	119850	19.82	EVCDEERFDK
54	1::sw|O08394|CYPD_BACSU	Probable bifunctional P-450/NADPH-P450 reductase 1 OS=Bacillus subtilis (strain 168) GN=cypD PE=3 SV=1	1408	119850	42.12	ALDEAMHQMQR
54	1::sw|O08394|CYPD_BACSU	Probable bifunctional P-450/NADPH-P450 reductase 1 OS=Bacillus subtilis (strain 168) GN=cypD PE=3 SV=1	1408	119850	54.24	MLNVEDPETGEK
54	1::sw|O08394|CYPD_BACSU	Probable bifunctional P-450/NADPH-P450 reductase 1 OS=Bacillus subtilis (strain 168) GN=cypD PE=3 SV=1	1408	119850	48.21	MLNVEDPETGEK
54	1::sw|O08394|CYPD_BACSU	Probable bifunctional P-450/NADPH-P450 reductase 1 OS=Bacillus subtilis (strain 168) GN=cypD PE=3 SV=1	1408	119850	54.09	MLNVEDPETGEK
54	1::sw|O08394|CYPD_BACSU	Probable bifunctional P-450/NADPH-P450 reductase 1 OS=Bacillus subtilis (strain 168) GN=cypD PE=3 SV=1	1408	119850	67.22	TFGPLGNLPLIDK
54	1::sw|O08394|CYPD_BACSU	Probable bifunctional P-450/NADPH-P450 reductase 1 OS=Bacillus subtilis (strain 168) GN=cypD PE=3 SV=1	1408	119850	30.24	ELASFTVCPPHR
54	1::sw|O08394|CYPD_BACSU	Probable bifunctional P-450/NADPH-P450 reductase 1 OS=Bacillus subtilis (strain 168) GN=cypD PE=3 SV=1	1408	119850	46.82	TLGEAHLYFGCR
54	1::sw|O08394|CYPD_BACSU	Probable bifunctional P-450/NADPH-P450 reductase 1 OS=Bacillus subtilis (strain 168) GN=cypD PE=3 SV=1	1408	119850	76.58	SYEASHASIAENR
54	1::sw|O08394|CYPD_BACSU	Probable bifunctional P-450/NADPH-P450 reductase 1 OS=Bacillus subtilis (strain 168) GN=cypD PE=3 SV=1	1408	119850	101.98	SYEASHASIAENR
54	1::sw|O08394|CYPD_BACSU	Probable bifunctional P-450/NADPH-P450 reductase 1 OS=Bacillus subtilis (strain 168) GN=cypD PE=3 SV=1	1408	119850	43.59	SYEASHASIAENR
54	1::sw|O08394|CYPD_BACSU	Probable bifunctional P-450/NADPH-P450 reductase 1 OS=Bacillus subtilis (strain 168) GN=cypD PE=3 SV=1	1408	119850	31.56	SYEASHASIAENR
54	1::sw|O08394|CYPD_BACSU	Probable bifunctional P-450/NADPH-P450 reductase 1 OS=Bacillus subtilis (strain 168) GN=cypD PE=3 SV=1	1408	119850	29.34	LWPTAPAFSLYPK
54	1::sw|O08394|CYPD_BACSU	Probable bifunctional P-450/NADPH-P450 reductase 1 OS=Bacillus subtilis (strain 168) GN=cypD PE=3 SV=1	1408	119850	44.87	AFGLELNENADKER
54	1::sw|O08394|CYPD_BACSU	Probable bifunctional P-450/NADPH-P450 reductase 1 OS=Bacillus subtilis (strain 168) GN=cypD PE=3 SV=1	1408	119850	41.53	LNPNEAVDVPGDMTR
54	1::sw|O08394|CYPD_BACSU	Probable bifunctional P-450/NADPH-P450 reductase 1 OS=Bacillus subtilis (strain 168) GN=cypD PE=3 SV=1	1408	119850	60.54	DPETPIIMVGPGTGVAPFR
54	1::sw|O08394|CYPD_BACSU	Probable bifunctional P-450/NADPH-P450 reductase 1 OS=Bacillus subtilis (strain 168) GN=cypD PE=3 SV=1	1408	119850	82.24	ELEELSAEGVYQEQILK
54	1::sw|O08394|CYPD_BACSU	Probable bifunctional P-450/NADPH-P450 reductase 1 OS=Bacillus subtilis (strain 168) GN=cypD PE=3 SV=1	1408	119850	22.14	YDIQTMFSLVDSIIAER
54	1::sw|O08394|CYPD_BACSU	Probable bifunctional P-450/NADPH-P450 reductase 1 OS=Bacillus subtilis (strain 168) GN=cypD PE=3 SV=1	1408	119850	50.75	AYQAVHGTGEQEAQNWLR
54	1::sw|O08394|CYPD_BACSU	Probable bifunctional P-450/NADPH-P450 reductase 1 OS=Bacillus subtilis (strain 168) GN=cypD PE=3 SV=1	1408	119850	38.99	AYQAVHGTGEQEAQNWLR
54	1::sw|O08394|CYPD_BACSU	Probable bifunctional P-450/NADPH-P450 reductase 1 OS=Bacillus subtilis (strain 168) GN=cypD PE=3 SV=1	1408	119850	33.02	TYVQHLMADQADTLISILDR
54	1::sw|O08394|CYPD_BACSU	Probable bifunctional P-450/NADPH-P450 reductase 1 OS=Bacillus subtilis (strain 168) GN=cypD PE=3 SV=1	1408	119850	60.89	HIEIALPPDVEYQEGDHLGVLPK
134	1::sw|O30509|GATB_BACSU	Aspartyl/glutamyl-tRNA(Asn/Gln) amidotransferase subunit B OS=Bacillus subtilis (strain 168) GN=gatB PE=1 SV=2	601	53691	36.61	ILLEEIK
134	1::sw|O30509|GATB_BACSU	Aspartyl/glutamyl-tRNA(Asn/Gln) amidotransferase subunit B OS=Bacillus subtilis (strain 168) GN=gatB PE=1 SV=2	601	53691	43.18	EAVEFAMK
134	1::sw|O30509|GATB_BACSU	Aspartyl/glutamyl-tRNA(Asn/Gln) amidotransferase subunit B OS=Bacillus subtilis (strain 168) GN=gatB PE=1 SV=2	601	53691	41.01	EAVEFAMK
134	1::sw|O30509|GATB_BACSU	Aspartyl/glutamyl-tRNA(Asn/Gln) amidotransferase subunit B OS=Bacillus subtilis (strain 168) GN=gatB PE=1 SV=2	601	53691	50.63	LHLEEDAGK
134	1::sw|O30509|GATB_BACSU	Aspartyl/glutamyl-tRNA(Asn/Gln) amidotransferase subunit B OS=Bacillus subtilis (strain 168) GN=gatB PE=1 SV=2	601	53691	34.65	GQANPPMVNK
134	1::sw|O30509|GATB_BACSU	Aspartyl/glutamyl-tRNA(Asn/Gln) amidotransferase subunit B OS=Bacillus subtilis (strain 168) GN=gatB PE=1 SV=2	601	53691	51.45	VKEGSDDYR
134	1::sw|O30509|GATB_BACSU	Aspartyl/glutamyl-tRNA(Asn/Gln) amidotransferase subunit B OS=Bacillus subtilis (strain 168) GN=gatB PE=1 SV=2	601	53691	23.61	ASIPELPDER
134	1::sw|O30509|GATB_BACSU	Aspartyl/glutamyl-tRNA(Asn/Gln) amidotransferase subunit B OS=Bacillus subtilis (strain 168) GN=gatB PE=1 SV=2	601	53691	20.52	NYFYPDNPK
134	1::sw|O30509|GATB_BACSU	Aspartyl/glutamyl-tRNA(Asn/Gln) amidotransferase subunit B OS=Bacillus subtilis (strain 168) GN=gatB PE=1 SV=2	601	53691	58.21	NLNSFAFVQK
134	1::sw|O30509|GATB_BACSU	Aspartyl/glutamyl-tRNA(Asn/Gln) amidotransferase subunit B OS=Bacillus subtilis (strain 168) GN=gatB PE=1 SV=2	601	53691	77.35	AIGFLVGQIMK
134	1::sw|O30509|GATB_BACSU	Aspartyl/glutamyl-tRNA(Asn/Gln) amidotransferase subunit B OS=Bacillus subtilis (strain 168) GN=gatB PE=1 SV=2	601	53691	57.66	TPEEAYAYLEK
134	1::sw|O30509|GATB_BACSU	Aspartyl/glutamyl-tRNA(Asn/Gln) amidotransferase subunit B OS=Bacillus subtilis (strain 168) GN=gatB PE=1 SV=2	601	53691	21.64	SIIQYTGVSDCK
134	1::sw|O30509|GATB_BACSU	Aspartyl/glutamyl-tRNA(Asn/Gln) amidotransferase subunit B OS=Bacillus subtilis (strain 168) GN=gatB PE=1 SV=2	601	53691	68.29	SIIQYTGVSDCK
134	1::sw|O30509|GATB_BACSU	Aspartyl/glutamyl-tRNA(Asn/Gln) amidotransferase subunit B OS=Bacillus subtilis (strain 168) GN=gatB PE=1 SV=2	601	53691	68.04	SIIQYTGVSDCK
134	1::sw|O30509|GATB_BACSU	Aspartyl/glutamyl-tRNA(Asn/Gln) amidotransferase subunit B OS=Bacillus subtilis (strain 168) GN=gatB PE=1 SV=2	601	53691	70.64	GLVQISDEGVLLK
134	1::sw|O30509|GATB_BACSU	Aspartyl/glutamyl-tRNA(Asn/Gln) amidotransferase subunit B OS=Bacillus subtilis (strain 168) GN=gatB PE=1 SV=2	601	53691	31.79	GLVQISDEGVLLK
134	1::sw|O30509|GATB_BACSU	Aspartyl/glutamyl-tRNA(Asn/Gln) amidotransferase subunit B OS=Bacillus subtilis (strain 168) GN=gatB PE=1 SV=2	601	53691	35.34	EMADFFEETVQK
134	1::sw|O30509|GATB_BACSU	Aspartyl/glutamyl-tRNA(Asn/Gln) amidotransferase subunit B OS=Bacillus subtilis (strain 168) GN=gatB PE=1 SV=2	601	53691	87.96	AAMALNCEIATDTK
134	1::sw|O30509|GATB_BACSU	Aspartyl/glutamyl-tRNA(Asn/Gln) amidotransferase subunit B OS=Bacillus subtilis (strain 168) GN=gatB PE=1 SV=2	601	53691	34.69	ELADVALTPEGLAGMIK
134	1::sw|O30509|GATB_BACSU	Aspartyl/glutamyl-tRNA(Asn/Gln) amidotransferase subunit B OS=Bacillus subtilis (strain 168) GN=gatB PE=1 SV=2	601	53691	66.93	ELADVALTPEGLAGMIK
134	1::sw|O30509|GATB_BACSU	Aspartyl/glutamyl-tRNA(Asn/Gln) amidotransferase subunit B OS=Bacillus subtilis (strain 168) GN=gatB PE=1 SV=2	601	53691	40.73	CDANISLRPIGQEEFGTK
557	1::sw|O31428|SKFF_BACSU	Putative bacteriocin-SkfA transport system permease protein SkfF OS=Bacillus subtilis (strain 168) GN=skfF PE=2 SV=2	74	52125	44.37	QFGSGQIIQKPK
557	1::sw|O31428|SKFF_BACSU	Putative bacteriocin-SkfA transport system permease protein SkfF OS=Bacillus subtilis (strain 168) GN=skfF PE=2 SV=2	74	52125	26.91	QFGSGQIIQKPK
557	1::sw|O31428|SKFF_BACSU	Putative bacteriocin-SkfA transport system permease protein SkfF OS=Bacillus subtilis (strain 168) GN=skfF PE=2 SV=2	74	52125	41.67	EAEFWEEFQER
635	1::sw|O31431|YBDG_BACSU	Uncharacterized protein YbdG OS=Bacillus subtilis (strain 168) GN=ybdG PE=4 SV=2	56	37042	53.86	ETPVLILDAVSDQNR
635	1::sw|O31431|YBDG_BACSU	Uncharacterized protein YbdG OS=Bacillus subtilis (strain 168) GN=ybdG PE=4 SV=2	56	37042	24.37	AIIAMDIGLPQQYVTYK
842	1::sw|O31433|YBDK_BACSU	Sensor histidine kinase YbdK OS=Bacillus subtilis (strain 168) GN=ybdK PE=3 SV=1	21	37363	21.07	HDINTPLTALR
383	1::sw|O31440|CYPC_BACSU	Fatty-acid peroxygenase OS=Bacillus subtilis (strain 168) GN=cypC PE=1 SV=1	163	48363	61.36	YNSDLFQAR
383	1::sw|O31440|CYPC_BACSU	Fatty-acid peroxygenase OS=Bacillus subtilis (strain 168) GN=cypC PE=1 SV=1	163	48363	31.9	ADEVVLFEEAK
383	1::sw|O31440|CYPC_BACSU	Fatty-acid peroxygenase OS=Bacillus subtilis (strain 168) GN=cypC PE=1 SV=1	163	48363	49.54	NFICMTGAEAAK
383	1::sw|O31440|CYPC_BACSU	Fatty-acid peroxygenase OS=Bacillus subtilis (strain 168) GN=cypC PE=1 SV=1	163	48363	44.48	CPGEGITIEVMK
383	1::sw|O31440|CYPC_BACSU	Fatty-acid peroxygenase OS=Bacillus subtilis (strain 168) GN=cypC PE=1 SV=1	163	48363	29.58	LWDHPDEFRPER
383	1::sw|O31440|CYPC_BACSU	Fatty-acid peroxygenase OS=Bacillus subtilis (strain 168) GN=cypC PE=1 SV=1	163	48363	54.61	ASLDFLVHQIEYDVPEQSLHYSLAR
754	1::sw|O31441|YBYB_BACSU	Uncharacterized protein YbyB OS=Bacillus subtilis (strain 168) GN=ybyB PE=4 SV=1	34	9856	33.82	AGHPDPQDIEDNK
414	1::sw|O31446|YBFF_BACSU	Uncharacterized protein YbfF OS=Bacillus subtilis (strain 168) GN=ybfF PE=4 SV=1	142	35458	81.76	GVIDFILTER
414	1::sw|O31446|YBFF_BACSU	Uncharacterized protein YbfF OS=Bacillus subtilis (strain 168) GN=ybfF PE=4 SV=1	142	35458	28.24	NDKELLGYLDTR
414	1::sw|O31446|YBFF_BACSU	Uncharacterized protein YbfF OS=Bacillus subtilis (strain 168) GN=ybfF PE=4 SV=1	142	35458	73.15	NIAHDINQMQNQQEIIDYLFR
629	1::sw|O31451|YBFJ_BACSU	Uncharacterized protein YbfJ OS=Bacillus subtilis (strain 168) GN=ybfJ PE=4 SV=1	57	14557	56.71	GLPVEGVQVTIVK
478	1::sw|O31498|DNLJ_BACSU	DNA ligase OS=Bacillus subtilis (strain 168) GN=ligA PE=3 SV=1	104	75115	27.8	DIRILDK
478	1::sw|O31498|DNLJ_BACSU	DNA ligase OS=Bacillus subtilis (strain 168) GN=ligA PE=3 SV=1	104	75115	27.12	TPDSPTQR
478	1::sw|O31498|DNLJ_BACSU	DNA ligase OS=Bacillus subtilis (strain 168) GN=ligA PE=3 SV=1	104	75115	19.52	SKENSLER
478	1::sw|O31498|DNLJ_BACSU	DNA ligase OS=Bacillus subtilis (strain 168) GN=ligA PE=3 SV=1	104	75115	19.74	ERVIQLER
478	1::sw|O31498|DNLJ_BACSU	DNA ligase OS=Bacillus subtilis (strain 168) GN=ligA PE=3 SV=1	104	75115	20.47	ASLHNEDLIK
478	1::sw|O31498|DNLJ_BACSU	DNA ligase OS=Bacillus subtilis (strain 168) GN=ligA PE=3 SV=1	104	75115	19.47	NAMNIDGLGER
478	1::sw|O31498|DNLJ_BACSU	DNA ligase OS=Bacillus subtilis (strain 168) GN=ligA PE=3 SV=1	104	75115	23.3	ADLPYEIDGIVIK
478	1::sw|O31498|DNLJ_BACSU	DNA ligase OS=Bacillus subtilis (strain 168) GN=ligA PE=3 SV=1	104	75115	48.81	GDGTTGEDITENLK
478	1::sw|O31498|DNLJ_BACSU	DNA ligase OS=Bacillus subtilis (strain 168) GN=ligA PE=3 SV=1	104	75115	24.93	GDGTTGEDITENLK
478	1::sw|O31498|DNLJ_BACSU	DNA ligase OS=Bacillus subtilis (strain 168) GN=ligA PE=3 SV=1	104	75115	51.29	VITQLFEENLVR
30	1::sw|O31501|SWRC_BACSU	Swarming motility protein SwrC OS=Bacillus subtilis (strain 168) GN=swrC PE=1 SV=2	2125	113435	18.2	FKEDHK
30	1::sw|O31501|SWRC_BACSU	Swarming motility protein SwrC OS=Bacillus subtilis (strain 168) GN=swrC PE=1 SV=2	2125	113435	23.67	IGDVAKVK
30	1::sw|O31501|SWRC_BACSU	Swarming motility protein SwrC OS=Bacillus subtilis (strain 168) GN=swrC PE=1 SV=2	2125	113435	26.95	IGDVAKVK
30	1::sw|O31501|SWRC_BACSU	Swarming motility protein SwrC OS=Bacillus subtilis (strain 168) GN=swrC PE=1 SV=2	2125	113435	25.41	IGDVAKVK
30	1::sw|O31501|SWRC_BACSU	Swarming motility protein SwrC OS=Bacillus subtilis (strain 168) GN=swrC PE=1 SV=2	2125	113435	24.53	LKDEPLR
30	1::sw|O31501|SWRC_BACSU	Swarming motility protein SwrC OS=Bacillus subtilis (strain 168) GN=swrC PE=1 SV=2	2125	113435	48.95	DSIGINIVK
30	1::sw|O31501|SWRC_BACSU	Swarming motility protein SwrC OS=Bacillus subtilis (strain 168) GN=swrC PE=1 SV=2	2125	113435	34.47	DSIGINIVK
30	1::sw|O31501|SWRC_BACSU	Swarming motility protein SwrC OS=Bacillus subtilis (strain 168) GN=swrC PE=1 SV=2	2125	113435	42.15	DSIGINIVK
30	1::sw|O31501|SWRC_BACSU	Swarming motility protein SwrC OS=Bacillus subtilis (strain 168) GN=swrC PE=1 SV=2	2125	113435	26.48	QVEDSLVSK
30	1::sw|O31501|SWRC_BACSU	Swarming motility protein SwrC OS=Bacillus subtilis (strain 168) GN=swrC PE=1 SV=2	2125	113435	22.67	QVEDSLVSK
30	1::sw|O31501|SWRC_BACSU	Swarming motility protein SwrC OS=Bacillus subtilis (strain 168) GN=swrC PE=1 SV=2	2125	113435	31.82	QVEDSLVSK
30	1::sw|O31501|SWRC_BACSU	Swarming motility protein SwrC OS=Bacillus subtilis (strain 168) GN=swrC PE=1 SV=2	2125	113435	25.87	QVEDSLVSK
30	1::sw|O31501|SWRC_BACSU	Swarming motility protein SwrC OS=Bacillus subtilis (strain 168) GN=swrC PE=1 SV=2	2125	113435	52.41	ITSATGQEVK
30	1::sw|O31501|SWRC_BACSU	Swarming motility protein SwrC OS=Bacillus subtilis (strain 168) GN=swrC PE=1 SV=2	2125	113435	42.28	ITSATGQEVK
30	1::sw|O31501|SWRC_BACSU	Swarming motility protein SwrC OS=Bacillus subtilis (strain 168) GN=swrC PE=1 SV=2	2125	113435	47.79	ITSATGQEVK
30	1::sw|O31501|SWRC_BACSU	Swarming motility protein SwrC OS=Bacillus subtilis (strain 168) GN=swrC PE=1 SV=2	2125	113435	37.81	ITSATGQEVK
30	1::sw|O31501|SWRC_BACSU	Swarming motility protein SwrC OS=Bacillus subtilis (strain 168) GN=swrC PE=1 SV=2	2125	113435	50.9	ITSATGQEVK
30	1::sw|O31501|SWRC_BACSU	Swarming motility protein SwrC OS=Bacillus subtilis (strain 168) GN=swrC PE=1 SV=2	2125	113435	53.53	ITSATGQEVK
30	1::sw|O31501|SWRC_BACSU	Swarming motility protein SwrC OS=Bacillus subtilis (strain 168) GN=swrC PE=1 SV=2	2125	113435	25.91	ITSATGQEVK
30	1::sw|O31501|SWRC_BACSU	Swarming motility protein SwrC OS=Bacillus subtilis (strain 168) GN=swrC PE=1 SV=2	2125	113435	20.2	ITSATGQEVK
30	1::sw|O31501|SWRC_BACSU	Swarming motility protein SwrC OS=Bacillus subtilis (strain 168) GN=swrC PE=1 SV=2	2125	113435	58.17	EALLEAGSTR
30	1::sw|O31501|SWRC_BACSU	Swarming motility protein SwrC OS=Bacillus subtilis (strain 168) GN=swrC PE=1 SV=2	2125	113435	65.45	EALLEAGSTR
30	1::sw|O31501|SWRC_BACSU	Swarming motility protein SwrC OS=Bacillus subtilis (strain 168) GN=swrC PE=1 SV=2	2125	113435	44.88	EALLEAGSTR
30	1::sw|O31501|SWRC_BACSU	Swarming motility protein SwrC OS=Bacillus subtilis (strain 168) GN=swrC PE=1 SV=2	2125	113435	45.45	EALLEAGSTR
30	1::sw|O31501|SWRC_BACSU	Swarming motility protein SwrC OS=Bacillus subtilis (strain 168) GN=swrC PE=1 SV=2	2125	113435	47.98	EALLEAGSTR
30	1::sw|O31501|SWRC_BACSU	Swarming motility protein SwrC OS=Bacillus subtilis (strain 168) GN=swrC PE=1 SV=2	2125	113435	63.14	EALLEAGSTR
30	1::sw|O31501|SWRC_BACSU	Swarming motility protein SwrC OS=Bacillus subtilis (strain 168) GN=swrC PE=1 SV=2	2125	113435	81.56	EALLEAGSTR
30	1::sw|O31501|SWRC_BACSU	Swarming motility protein SwrC OS=Bacillus subtilis (strain 168) GN=swrC PE=1 SV=2	2125	113435	58.46	KITSATGQEVK
30	1::sw|O31501|SWRC_BACSU	Swarming motility protein SwrC OS=Bacillus subtilis (strain 168) GN=swrC PE=1 SV=2	2125	113435	41.12	KITSATGQEVK
30	1::sw|O31501|SWRC_BACSU	Swarming motility protein SwrC OS=Bacillus subtilis (strain 168) GN=swrC PE=1 SV=2	2125	113435	46.82	KITSATGQEVK
30	1::sw|O31501|SWRC_BACSU	Swarming motility protein SwrC OS=Bacillus subtilis (strain 168) GN=swrC PE=1 SV=2	2125	113435	48.75	KITSATGQEVK
30	1::sw|O31501|SWRC_BACSU	Swarming motility protein SwrC OS=Bacillus subtilis (strain 168) GN=swrC PE=1 SV=2	2125	113435	50.48	VKEGSTSDTVSK
30	1::sw|O31501|SWRC_BACSU	Swarming motility protein SwrC OS=Bacillus subtilis (strain 168) GN=swrC PE=1 SV=2	2125	113435	31.14	VKEGSTSDTVSK
30	1::sw|O31501|SWRC_BACSU	Swarming motility protein SwrC OS=Bacillus subtilis (strain 168) GN=swrC PE=1 SV=2	2125	113435	51.24	VKEGSTSDTVSK
30	1::sw|O31501|SWRC_BACSU	Swarming motility protein SwrC OS=Bacillus subtilis (strain 168) GN=swrC PE=1 SV=2	2125	113435	55.54	VKEGSTSDTVSK
30	1::sw|O31501|SWRC_BACSU	Swarming motility protein SwrC OS=Bacillus subtilis (strain 168) GN=swrC PE=1 SV=2	2125	113435	53.82	VKEGSTSDTVSK
30	1::sw|O31501|SWRC_BACSU	Swarming motility protein SwrC OS=Bacillus subtilis (strain 168) GN=swrC PE=1 SV=2	2125	113435	50.33	VKEGSTSDTVSK
30	1::sw|O31501|SWRC_BACSU	Swarming motility protein SwrC OS=Bacillus subtilis (strain 168) GN=swrC PE=1 SV=2	2125	113435	54.96	VKEGSTSDTVSK
30	1::sw|O31501|SWRC_BACSU	Swarming motility protein SwrC OS=Bacillus subtilis (strain 168) GN=swrC PE=1 SV=2	2125	113435	35.04	VKEGSTSDTVSK
30	1::sw|O31501|SWRC_BACSU	Swarming motility protein SwrC OS=Bacillus subtilis (strain 168) GN=swrC PE=1 SV=2	2125	113435	61.98	VKEGSTSDTVSK
30	1::sw|O31501|SWRC_BACSU	Swarming motility protein SwrC OS=Bacillus subtilis (strain 168) GN=swrC PE=1 SV=2	2125	113435	52.15	SVVVSGDIETIK
30	1::sw|O31501|SWRC_BACSU	Swarming motility protein SwrC OS=Bacillus subtilis (strain 168) GN=swrC PE=1 SV=2	2125	113435	41.06	SVVVSGDIETIK
30	1::sw|O31501|SWRC_BACSU	Swarming motility protein SwrC OS=Bacillus subtilis (strain 168) GN=swrC PE=1 SV=2	2125	113435	51.99	EAENEAEKAEK
30	1::sw|O31501|SWRC_BACSU	Swarming motility protein SwrC OS=Bacillus subtilis (strain 168) GN=swrC PE=1 SV=2	2125	113435	26.62	EAENEAEKAEK
30	1::sw|O31501|SWRC_BACSU	Swarming motility protein SwrC OS=Bacillus subtilis (strain 168) GN=swrC PE=1 SV=2	2125	113435	24.6	EAENEAEKAEK
30	1::sw|O31501|SWRC_BACSU	Swarming motility protein SwrC OS=Bacillus subtilis (strain 168) GN=swrC PE=1 SV=2	2125	113435	37.22	EAENEAEKAEK
30	1::sw|O31501|SWRC_BACSU	Swarming motility protein SwrC OS=Bacillus subtilis (strain 168) GN=swrC PE=1 SV=2	2125	113435	21.53	EAENEAEKAEK
30	1::sw|O31501|SWRC_BACSU	Swarming motility protein SwrC OS=Bacillus subtilis (strain 168) GN=swrC PE=1 SV=2	2125	113435	59.65	LKEYGLDEDTVK
30	1::sw|O31501|SWRC_BACSU	Swarming motility protein SwrC OS=Bacillus subtilis (strain 168) GN=swrC PE=1 SV=2	2125	113435	59.31	LKEYGLDEDTVK
30	1::sw|O31501|SWRC_BACSU	Swarming motility protein SwrC OS=Bacillus subtilis (strain 168) GN=swrC PE=1 SV=2	2125	113435	65.35	LKEYGLDEDTVK
30	1::sw|O31501|SWRC_BACSU	Swarming motility protein SwrC OS=Bacillus subtilis (strain 168) GN=swrC PE=1 SV=2	2125	113435	126.09	ANDANTVEVADDVK
30	1::sw|O31501|SWRC_BACSU	Swarming motility protein SwrC OS=Bacillus subtilis (strain 168) GN=swrC PE=1 SV=2	2125	113435	122.07	ANDANTVEVADDVK
30	1::sw|O31501|SWRC_BACSU	Swarming motility protein SwrC OS=Bacillus subtilis (strain 168) GN=swrC PE=1 SV=2	2125	113435	104.34	ANDANTVEVADDVK
30	1::sw|O31501|SWRC_BACSU	Swarming motility protein SwrC OS=Bacillus subtilis (strain 168) GN=swrC PE=1 SV=2	2125	113435	96.6	ANDANTVEVADDVK
30	1::sw|O31501|SWRC_BACSU	Swarming motility protein SwrC OS=Bacillus subtilis (strain 168) GN=swrC PE=1 SV=2	2125	113435	26.34	ANDANTVEVADDVK
30	1::sw|O31501|SWRC_BACSU	Swarming motility protein SwrC OS=Bacillus subtilis (strain 168) GN=swrC PE=1 SV=2	2125	113435	77.24	ANDANTVEVADDVK
30	1::sw|O31501|SWRC_BACSU	Swarming motility protein SwrC OS=Bacillus subtilis (strain 168) GN=swrC PE=1 SV=2	2125	113435	80.35	ANDANTVEVADDVK
30	1::sw|O31501|SWRC_BACSU	Swarming motility protein SwrC OS=Bacillus subtilis (strain 168) GN=swrC PE=1 SV=2	2125	113435	46.77	YESDTPDFDKEK
30	1::sw|O31501|SWRC_BACSU	Swarming motility protein SwrC OS=Bacillus subtilis (strain 168) GN=swrC PE=1 SV=2	2125	113435	50.38	YESDTPDFDKEK
30	1::sw|O31501|SWRC_BACSU	Swarming motility protein SwrC OS=Bacillus subtilis (strain 168) GN=swrC PE=1 SV=2	2125	113435	47	YESDTPDFDKEK
30	1::sw|O31501|SWRC_BACSU	Swarming motility protein SwrC OS=Bacillus subtilis (strain 168) GN=swrC PE=1 SV=2	2125	113435	37.45	YESDTPDFDKEK
30	1::sw|O31501|SWRC_BACSU	Swarming motility protein SwrC OS=Bacillus subtilis (strain 168) GN=swrC PE=1 SV=2	2125	113435	53.4	YESDTPDFDKEK
30	1::sw|O31501|SWRC_BACSU	Swarming motility protein SwrC OS=Bacillus subtilis (strain 168) GN=swrC PE=1 SV=2	2125	113435	55.23	TMQLTYSPEPGETK
30	1::sw|O31501|SWRC_BACSU	Swarming motility protein SwrC OS=Bacillus subtilis (strain 168) GN=swrC PE=1 SV=2	2125	113435	54.38	TMQLTYSPEPGETK
30	1::sw|O31501|SWRC_BACSU	Swarming motility protein SwrC OS=Bacillus subtilis (strain 168) GN=swrC PE=1 SV=2	2125	113435	50.32	VVDDSIVVIENIYR
30	1::sw|O31501|SWRC_BACSU	Swarming motility protein SwrC OS=Bacillus subtilis (strain 168) GN=swrC PE=1 SV=2	2125	113435	67.68	VVDDSIVVIENIYR
30	1::sw|O31501|SWRC_BACSU	Swarming motility protein SwrC OS=Bacillus subtilis (strain 168) GN=swrC PE=1 SV=2	2125	113435	74.53	VVDDSIVVIENIYR
30	1::sw|O31501|SWRC_BACSU	Swarming motility protein SwrC OS=Bacillus subtilis (strain 168) GN=swrC PE=1 SV=2	2125	113435	69.85	VVDDSIVVIENIYR
30	1::sw|O31501|SWRC_BACSU	Swarming motility protein SwrC OS=Bacillus subtilis (strain 168) GN=swrC PE=1 SV=2	2125	113435	37.95	TMQLTYSPEPGETKK
30	1::sw|O31501|SWRC_BACSU	Swarming motility protein SwrC OS=Bacillus subtilis (strain 168) GN=swrC PE=1 SV=2	2125	113435	22.13	TMQLTYSPEPGETKK
30	1::sw|O31501|SWRC_BACSU	Swarming motility protein SwrC OS=Bacillus subtilis (strain 168) GN=swrC PE=1 SV=2	2125	113435	27.14	TMQLTYSPEPGETKK
30	1::sw|O31501|SWRC_BACSU	Swarming motility protein SwrC OS=Bacillus subtilis (strain 168) GN=swrC PE=1 SV=2	2125	113435	93.34	TEAAEALENVNLPDDAKDPEISR
30	1::sw|O31501|SWRC_BACSU	Swarming motility protein SwrC OS=Bacillus subtilis (strain 168) GN=swrC PE=1 SV=2	2125	113435	52.4	TEAAEALENVNLPDDAKDPEISR
30	1::sw|O31501|SWRC_BACSU	Swarming motility protein SwrC OS=Bacillus subtilis (strain 168) GN=swrC PE=1 SV=2	2125	113435	29.1	TEAAEALENVNLPDDAKDPEISR
30	1::sw|O31501|SWRC_BACSU	Swarming motility protein SwrC OS=Bacillus subtilis (strain 168) GN=swrC PE=1 SV=2	2125	113435	50.29	LGLTASQISQALMSQTSQEPLTTVK
30	1::sw|O31501|SWRC_BACSU	Swarming motility protein SwrC OS=Bacillus subtilis (strain 168) GN=swrC PE=1 SV=2	2125	113435	45.4	LGLTASQISQALMSQTSQEPLTTVK
30	1::sw|O31501|SWRC_BACSU	Swarming motility protein SwrC OS=Bacillus subtilis (strain 168) GN=swrC PE=1 SV=2	2125	113435	29.6	LGLTASQISQALMSQTSQEPLTTVK
30	1::sw|O31501|SWRC_BACSU	Swarming motility protein SwrC OS=Bacillus subtilis (strain 168) GN=swrC PE=1 SV=2	2125	113435	18.77	YSLNSFPILTLSVSSDKDNLQELTK
780	1::sw|O31502|DAGK_BACSU	Diacylglycerol kinase OS=Bacillus subtilis (strain 168) GN=dagK PE=1 SV=1	30	33373	29.9	LTELTYDVPSK
735	1::sw|O31503|RLMCD_BACSU	23S rRNA (uracil-C(5))-methyltransferase RlmCD OS=Bacillus subtilis (strain 168) GN=rlmCD PE=1 SV=1	36	52357	20.57	LIELK
735	1::sw|O31503|RLMCD_BACSU	23S rRNA (uracil-C(5))-methyltransferase RlmCD OS=Bacillus subtilis (strain 168) GN=rlmCD PE=1 SV=1	36	52357	35.89	SFYQVNPEQTK
57	1::sw|O31533|YETF_BACSU	UPF0702 transmembrane protein YetF OS=Bacillus subtilis (strain 168) GN=yetF PE=1 SV=1	1353	26350	38.29	DLQIPSK
57	1::sw|O31533|YETF_BACSU	UPF0702 transmembrane protein YetF OS=Bacillus subtilis (strain 168) GN=yetF PE=1 SV=1	1353	26350	41.55	DLQIPSK
57	1::sw|O31533|YETF_BACSU	UPF0702 transmembrane protein YetF OS=Bacillus subtilis (strain 168) GN=yetF PE=1 SV=1	1353	26350	37.33	KGELQYK
57	1::sw|O31533|YETF_BACSU	UPF0702 transmembrane protein YetF OS=Bacillus subtilis (strain 168) GN=yetF PE=1 SV=1	1353	26350	34.69	SDFDKPTNK
57	1::sw|O31533|YETF_BACSU	UPF0702 transmembrane protein YetF OS=Bacillus subtilis (strain 168) GN=yetF PE=1 SV=1	1353	26350	23	SDFDKPTNK
57	1::sw|O31533|YETF_BACSU	UPF0702 transmembrane protein YetF OS=Bacillus subtilis (strain 168) GN=yetF PE=1 SV=1	1353	26350	29.73	SDFDKPTNK
57	1::sw|O31533|YETF_BACSU	UPF0702 transmembrane protein YetF OS=Bacillus subtilis (strain 168) GN=yetF PE=1 SV=1	1353	26350	34.73	SDFDKPTNK
57	1::sw|O31533|YETF_BACSU	UPF0702 transmembrane protein YetF OS=Bacillus subtilis (strain 168) GN=yetF PE=1 SV=1	1353	26350	28.65	EAGVDEQWLK
57	1::sw|O31533|YETF_BACSU	UPF0702 transmembrane protein YetF OS=Bacillus subtilis (strain 168) GN=yetF PE=1 SV=1	1353	26350	37.39	EAGVDEQWLK
57	1::sw|O31533|YETF_BACSU	UPF0702 transmembrane protein YetF OS=Bacillus subtilis (strain 168) GN=yetF PE=1 SV=1	1353	26350	46.9	EAGVDEQWLK
57	1::sw|O31533|YETF_BACSU	UPF0702 transmembrane protein YetF OS=Bacillus subtilis (strain 168) GN=yetF PE=1 SV=1	1353	26350	38.26	EAGVDEQWLK
57	1::sw|O31533|YETF_BACSU	UPF0702 transmembrane protein YetF OS=Bacillus subtilis (strain 168) GN=yetF PE=1 SV=1	1353	26350	45.18	EAGVDEQWLK
57	1::sw|O31533|YETF_BACSU	UPF0702 transmembrane protein YetF OS=Bacillus subtilis (strain 168) GN=yetF PE=1 SV=1	1353	26350	48.2	EAGVDEQWLK
57	1::sw|O31533|YETF_BACSU	UPF0702 transmembrane protein YetF OS=Bacillus subtilis (strain 168) GN=yetF PE=1 SV=1	1353	26350	56.4	EAGVDEQWLK
57	1::sw|O31533|YETF_BACSU	UPF0702 transmembrane protein YetF OS=Bacillus subtilis (strain 168) GN=yetF PE=1 SV=1	1353	26350	42.12	FLEGEPNIVIR
57	1::sw|O31533|YETF_BACSU	UPF0702 transmembrane protein YetF OS=Bacillus subtilis (strain 168) GN=yetF PE=1 SV=1	1353	26350	39.9	FLEGEPNIVIR
57	1::sw|O31533|YETF_BACSU	UPF0702 transmembrane protein YetF OS=Bacillus subtilis (strain 168) GN=yetF PE=1 SV=1	1353	26350	29.51	FLEGEPNIVIR
57	1::sw|O31533|YETF_BACSU	UPF0702 transmembrane protein YetF OS=Bacillus subtilis (strain 168) GN=yetF PE=1 SV=1	1353	26350	54.39	IDINQLQSLLR
57	1::sw|O31533|YETF_BACSU	UPF0702 transmembrane protein YetF OS=Bacillus subtilis (strain 168) GN=yetF PE=1 SV=1	1353	26350	70.79	IDINQLQSLLR
57	1::sw|O31533|YETF_BACSU	UPF0702 transmembrane protein YetF OS=Bacillus subtilis (strain 168) GN=yetF PE=1 SV=1	1353	26350	50.66	IDINQLQSLLR
57	1::sw|O31533|YETF_BACSU	UPF0702 transmembrane protein YetF OS=Bacillus subtilis (strain 168) GN=yetF PE=1 SV=1	1353	26350	89.67	IDINQLQSLLR
57	1::sw|O31533|YETF_BACSU	UPF0702 transmembrane protein YetF OS=Bacillus subtilis (strain 168) GN=yetF PE=1 SV=1	1353	26350	18.22	IDINQLQSLLR
57	1::sw|O31533|YETF_BACSU	UPF0702 transmembrane protein YetF OS=Bacillus subtilis (strain 168) GN=yetF PE=1 SV=1	1353	26350	24.22	TEDVLFAEWHK
57	1::sw|O31533|YETF_BACSU	UPF0702 transmembrane protein YetF OS=Bacillus subtilis (strain 168) GN=yetF PE=1 SV=1	1353	26350	60.91	TEDVLFAEWHK
57	1::sw|O31533|YETF_BACSU	UPF0702 transmembrane protein YetF OS=Bacillus subtilis (strain 168) GN=yetF PE=1 SV=1	1353	26350	70.62	TEDVLFAEWHK
57	1::sw|O31533|YETF_BACSU	UPF0702 transmembrane protein YetF OS=Bacillus subtilis (strain 168) GN=yetF PE=1 SV=1	1353	26350	59.69	KFLEGEPNIVIR
57	1::sw|O31533|YETF_BACSU	UPF0702 transmembrane protein YetF OS=Bacillus subtilis (strain 168) GN=yetF PE=1 SV=1	1353	26350	49.73	KFLEGEPNIVIR
57	1::sw|O31533|YETF_BACSU	UPF0702 transmembrane protein YetF OS=Bacillus subtilis (strain 168) GN=yetF PE=1 SV=1	1353	26350	36.85	KFLEGEPNIVIR
57	1::sw|O31533|YETF_BACSU	UPF0702 transmembrane protein YetF OS=Bacillus subtilis (strain 168) GN=yetF PE=1 SV=1	1353	26350	49.34	NKIDINQLQSLLR
57	1::sw|O31533|YETF_BACSU	UPF0702 transmembrane protein YetF OS=Bacillus subtilis (strain 168) GN=yetF PE=1 SV=1	1353	26350	57.23	NKIDINQLQSLLR
57	1::sw|O31533|YETF_BACSU	UPF0702 transmembrane protein YetF OS=Bacillus subtilis (strain 168) GN=yetF PE=1 SV=1	1353	26350	19.59	NKPLYTVTYEQSR
57	1::sw|O31533|YETF_BACSU	UPF0702 transmembrane protein YetF OS=Bacillus subtilis (strain 168) GN=yetF PE=1 SV=1	1353	26350	64.86	NKPLYTVTYEQSR
57	1::sw|O31533|YETF_BACSU	UPF0702 transmembrane protein YetF OS=Bacillus subtilis (strain 168) GN=yetF PE=1 SV=1	1353	26350	59.96	NKPLYTVTYEQSR
57	1::sw|O31533|YETF_BACSU	UPF0702 transmembrane protein YetF OS=Bacillus subtilis (strain 168) GN=yetF PE=1 SV=1	1353	26350	46.16	NKPLYTVTYEQSR
57	1::sw|O31533|YETF_BACSU	UPF0702 transmembrane protein YetF OS=Bacillus subtilis (strain 168) GN=yetF PE=1 SV=1	1353	26350	51.43	NKPLYTVTYEQSR
57	1::sw|O31533|YETF_BACSU	UPF0702 transmembrane protein YetF OS=Bacillus subtilis (strain 168) GN=yetF PE=1 SV=1	1353	26350	62.22	NKPLYTVTYEQSR
57	1::sw|O31533|YETF_BACSU	UPF0702 transmembrane protein YetF OS=Bacillus subtilis (strain 168) GN=yetF PE=1 SV=1	1353	26350	37.45	NKPLYTVTYEQSR
57	1::sw|O31533|YETF_BACSU	UPF0702 transmembrane protein YetF OS=Bacillus subtilis (strain 168) GN=yetF PE=1 SV=1	1353	26350	33.7	NKPLYTVTYEQSR
57	1::sw|O31533|YETF_BACSU	UPF0702 transmembrane protein YetF OS=Bacillus subtilis (strain 168) GN=yetF PE=1 SV=1	1353	26350	47.67	NKPLYTVTYEQSR
57	1::sw|O31533|YETF_BACSU	UPF0702 transmembrane protein YetF OS=Bacillus subtilis (strain 168) GN=yetF PE=1 SV=1	1353	26350	34.36	NKPLYTVTYEQSR
57	1::sw|O31533|YETF_BACSU	UPF0702 transmembrane protein YetF OS=Bacillus subtilis (strain 168) GN=yetF PE=1 SV=1	1353	26350	34.43	NKPLYTVTYEQSR
57	1::sw|O31533|YETF_BACSU	UPF0702 transmembrane protein YetF OS=Bacillus subtilis (strain 168) GN=yetF PE=1 SV=1	1353	26350	52.88	SVSLPITLIIDGEIVR
57	1::sw|O31533|YETF_BACSU	UPF0702 transmembrane protein YetF OS=Bacillus subtilis (strain 168) GN=yetF PE=1 SV=1	1353	26350	48.72	SVSLPITLIIDGEIVR
57	1::sw|O31533|YETF_BACSU	UPF0702 transmembrane protein YetF OS=Bacillus subtilis (strain 168) GN=yetF PE=1 SV=1	1353	26350	44.34	SVSLPITLIIDGEIVR
57	1::sw|O31533|YETF_BACSU	UPF0702 transmembrane protein YetF OS=Bacillus subtilis (strain 168) GN=yetF PE=1 SV=1	1353	26350	64.63	SVSLPITLIIDGEIVR
57	1::sw|O31533|YETF_BACSU	UPF0702 transmembrane protein YetF OS=Bacillus subtilis (strain 168) GN=yetF PE=1 SV=1	1353	26350	49.37	SVSLPITLIIDGEIVR
57	1::sw|O31533|YETF_BACSU	UPF0702 transmembrane protein YetF OS=Bacillus subtilis (strain 168) GN=yetF PE=1 SV=1	1353	26350	31.33	SVSLPITLIIDGEIVR
57	1::sw|O31533|YETF_BACSU	UPF0702 transmembrane protein YetF OS=Bacillus subtilis (strain 168) GN=yetF PE=1 SV=1	1353	26350	35.75	SVSLPITLIIDGEIVR
57	1::sw|O31533|YETF_BACSU	UPF0702 transmembrane protein YetF OS=Bacillus subtilis (strain 168) GN=yetF PE=1 SV=1	1353	26350	71.75	SVSLPITLIIDGEIVR
57	1::sw|O31533|YETF_BACSU	UPF0702 transmembrane protein YetF OS=Bacillus subtilis (strain 168) GN=yetF PE=1 SV=1	1353	26350	43.6	SVSLPITLIIDGEIVR
57	1::sw|O31533|YETF_BACSU	UPF0702 transmembrane protein YetF OS=Bacillus subtilis (strain 168) GN=yetF PE=1 SV=1	1353	26350	49.39	NIDKTEDVLFAEWHK
57	1::sw|O31533|YETF_BACSU	UPF0702 transmembrane protein YetF OS=Bacillus subtilis (strain 168) GN=yetF PE=1 SV=1	1353	26350	35.4	NIDKTEDVLFAEWHK
57	1::sw|O31533|YETF_BACSU	UPF0702 transmembrane protein YetF OS=Bacillus subtilis (strain 168) GN=yetF PE=1 SV=1	1353	26350	39.02	NIDKTEDVLFAEWHK
57	1::sw|O31533|YETF_BACSU	UPF0702 transmembrane protein YetF OS=Bacillus subtilis (strain 168) GN=yetF PE=1 SV=1	1353	26350	31.94	NIDKTEDVLFAEWHK
57	1::sw|O31533|YETF_BACSU	UPF0702 transmembrane protein YetF OS=Bacillus subtilis (strain 168) GN=yetF PE=1 SV=1	1353	26350	27	NIDKTEDVLFAEWHK
57	1::sw|O31533|YETF_BACSU	UPF0702 transmembrane protein YetF OS=Bacillus subtilis (strain 168) GN=yetF PE=1 SV=1	1353	26350	31.27	NIDKTEDVLFAEWHK
305	1::sw|O31543|YFJQ_BACSU	Putative metal ion transporter YfjQ OS=Bacillus subtilis (strain 168) GN=yfjQ PE=3 SV=1	228	37878	18.27	DMTSDLR
305	1::sw|O31543|YFJQ_BACSU	Putative metal ion transporter YfjQ OS=Bacillus subtilis (strain 168) GN=yfjQ PE=3 SV=1	228	37878	57.18	TDLLHLR
305	1::sw|O31543|YFJQ_BACSU	Putative metal ion transporter YfjQ OS=Bacillus subtilis (strain 168) GN=yfjQ PE=3 SV=1	228	37878	35.19	ILSLDHVK
305	1::sw|O31543|YFJQ_BACSU	Putative metal ion transporter YfjQ OS=Bacillus subtilis (strain 168) GN=yfjQ PE=3 SV=1	228	37878	27.74	LYASPDILK
305	1::sw|O31543|YFJQ_BACSU	Putative metal ion transporter YfjQ OS=Bacillus subtilis (strain 168) GN=yfjQ PE=3 SV=1	228	37878	21.64	LDHYDGYR
305	1::sw|O31543|YFJQ_BACSU	Putative metal ion transporter YfjQ OS=Bacillus subtilis (strain 168) GN=yfjQ PE=3 SV=1	228	37878	34.42	FYVIHALNK
305	1::sw|O31543|YFJQ_BACSU	Putative metal ion transporter YfjQ OS=Bacillus subtilis (strain 168) GN=yfjQ PE=3 SV=1	228	37878	57.68	DSYVTLNSNR
305	1::sw|O31543|YFJQ_BACSU	Putative metal ion transporter YfjQ OS=Bacillus subtilis (strain 168) GN=yfjQ PE=3 SV=1	228	37878	23.37	LNEIEESRPHK
305	1::sw|O31543|YFJQ_BACSU	Putative metal ion transporter YfjQ OS=Bacillus subtilis (strain 168) GN=yfjQ PE=3 SV=1	228	37878	71.48	TYGTLMNEVFDLR
305	1::sw|O31543|YFJQ_BACSU	Putative metal ion transporter YfjQ OS=Bacillus subtilis (strain 168) GN=yfjQ PE=3 SV=1	228	37878	69.21	ETLETEEVDIFQGEK
401	1::sw|O31545|YFJO_BACSU	Uncharacterized RNA methyltransferase YfjO OS=Bacillus subtilis (strain 168) GN=yfjO PE=3 SV=1	151	52499	23.29	SQFQIGR
401	1::sw|O31545|YFJO_BACSU	Uncharacterized RNA methyltransferase YfjO OS=Bacillus subtilis (strain 168) GN=yfjO PE=3 SV=1	151	52499	36.77	ESIDDAKK
401	1::sw|O31545|YFJO_BACSU	Uncharacterized RNA methyltransferase YfjO OS=Bacillus subtilis (strain 168) GN=yfjO PE=3 SV=1	151	52499	24.03	ESIDDAKK
401	1::sw|O31545|YFJO_BACSU	Uncharacterized RNA methyltransferase YfjO OS=Bacillus subtilis (strain 168) GN=yfjO PE=3 SV=1	151	52499	38.47	VGQTFPLTIK
401	1::sw|O31545|YFJO_BACSU	Uncharacterized RNA methyltransferase YfjO OS=Bacillus subtilis (strain 168) GN=yfjO PE=3 SV=1	151	52499	20.04	FKVENMEIK
401	1::sw|O31545|YFJO_BACSU	Uncharacterized RNA methyltransferase YfjO OS=Bacillus subtilis (strain 168) GN=yfjO PE=3 SV=1	151	52499	55.51	DCIVQHPATNK
401	1::sw|O31545|YFJO_BACSU	Uncharacterized RNA methyltransferase YfjO OS=Bacillus subtilis (strain 168) GN=yfjO PE=3 SV=1	151	52499	21.56	FVYVSCNPSTLAK
401	1::sw|O31545|YFJO_BACSU	Uncharacterized RNA methyltransferase YfjO OS=Bacillus subtilis (strain 168) GN=yfjO PE=3 SV=1	151	52499	65.97	ILEDFNVSVYNER
401	1::sw|O31545|YFJO_BACSU	Uncharacterized RNA methyltransferase YfjO OS=Bacillus subtilis (strain 168) GN=yfjO PE=3 SV=1	151	52499	42.9	VVFVPGALPGEEVVVQATK
497	1::sw|O31555|YFJD_BACSU	Uncharacterized lipoprotein YfjD OS=Bacillus subtilis (strain 168) GN=yfjD PE=4 SV=1	96	21785	18.8	EFENHPK
497	1::sw|O31555|YFJD_BACSU	Uncharacterized lipoprotein YfjD OS=Bacillus subtilis (strain 168) GN=yfjD PE=4 SV=1	96	21785	20.79	EFENHPK
497	1::sw|O31555|YFJD_BACSU	Uncharacterized lipoprotein YfjD OS=Bacillus subtilis (strain 168) GN=yfjD PE=4 SV=1	96	21785	51.75	SNWIGQFTDIQR
497	1::sw|O31555|YFJD_BACSU	Uncharacterized lipoprotein YfjD OS=Bacillus subtilis (strain 168) GN=yfjD PE=4 SV=1	96	21785	67.07	GIFQEDILIQTVDQK
565	1::sw|O31580|YFHL_BACSU	Uncharacterized protein YfhL OS=Bacillus subtilis (strain 168) GN=yfhL PE=4 SV=1	71	12052	34.1	LWNEANR
565	1::sw|O31580|YFHL_BACSU	Uncharacterized protein YfhL OS=Bacillus subtilis (strain 168) GN=yfhL PE=4 SV=1	71	12052	40.61	SINSVYGYR
565	1::sw|O31580|YFHL_BACSU	Uncharacterized protein YfhL OS=Bacillus subtilis (strain 168) GN=yfhL PE=4 SV=1	71	12052	28.34	IMTHSQGGDR
565	1::sw|O31580|YFHL_BACSU	Uncharacterized protein YfhL OS=Bacillus subtilis (strain 168) GN=yfhL PE=4 SV=1	71	12052	39.6	IMTHSQGGDR
565	1::sw|O31580|YFHL_BACSU	Uncharacterized protein YfhL OS=Bacillus subtilis (strain 168) GN=yfhL PE=4 SV=1	71	12052	23.76	IMTHSQGGDR
240	1::sw|O31581|YFHM_BACSU	AB hydrolase superfamily protein YfhM OS=Bacillus subtilis (strain 168) GN=yfhM PE=3 SV=1	314	32852	24.27	NQIKPLVDAGYR
240	1::sw|O31581|YFHM_BACSU	AB hydrolase superfamily protein YfhM OS=Bacillus subtilis (strain 168) GN=yfhM PE=3 SV=1	314	32852	51.37	NQIKPLVDAGYR
240	1::sw|O31581|YFHM_BACSU	AB hydrolase superfamily protein YfhM OS=Bacillus subtilis (strain 168) GN=yfhM PE=3 SV=1	314	32852	55.92	NQIKPLVDAGYR
240	1::sw|O31581|YFHM_BACSU	AB hydrolase superfamily protein YfhM OS=Bacillus subtilis (strain 168) GN=yfhM PE=3 SV=1	314	32852	24.3	TVTPLYPPQWLK
240	1::sw|O31581|YFHM_BACSU	AB hydrolase superfamily protein YfhM OS=Bacillus subtilis (strain 168) GN=yfhM PE=3 SV=1	314	32852	32.73	TVTPLYPPQWLK
240	1::sw|O31581|YFHM_BACSU	AB hydrolase superfamily protein YfhM OS=Bacillus subtilis (strain 168) GN=yfhM PE=3 SV=1	314	32852	49.23	DDIIGLITQFTDEK
240	1::sw|O31581|YFHM_BACSU	AB hydrolase superfamily protein YfhM OS=Bacillus subtilis (strain 168) GN=yfhM PE=3 SV=1	314	32852	45.95	GSLAEKPSYETVPYR
240	1::sw|O31581|YFHM_BACSU	AB hydrolase superfamily protein YfhM OS=Bacillus subtilis (strain 168) GN=yfhM PE=3 SV=1	314	32852	40.68	GSLAEKPSYETVPYR
240	1::sw|O31581|YFHM_BACSU	AB hydrolase superfamily protein YfhM OS=Bacillus subtilis (strain 168) GN=yfhM PE=3 SV=1	314	32852	27.4	GSLAEKPSYETVPYR
240	1::sw|O31581|YFHM_BACSU	AB hydrolase superfamily protein YfhM OS=Bacillus subtilis (strain 168) GN=yfhM PE=3 SV=1	314	32852	69.2	GYNLSDKPEGIDSYR
240	1::sw|O31581|YFHM_BACSU	AB hydrolase superfamily protein YfhM OS=Bacillus subtilis (strain 168) GN=yfhM PE=3 SV=1	314	32852	39.84	GYNLSDKPEGIDSYR
240	1::sw|O31581|YFHM_BACSU	AB hydrolase superfamily protein YfhM OS=Bacillus subtilis (strain 168) GN=yfhM PE=3 SV=1	314	32852	44.16	AIGLSDRPALFTSEDVSR
240	1::sw|O31581|YFHM_BACSU	AB hydrolase superfamily protein YfhM OS=Bacillus subtilis (strain 168) GN=yfhM PE=3 SV=1	314	32852	48.14	SSYIAYFQLPDIPEASLR
240	1::sw|O31581|YFHM_BACSU	AB hydrolase superfamily protein YfhM OS=Bacillus subtilis (strain 168) GN=yfhM PE=3 SV=1	314	32852	19.16	IDTLRDDIIGLITQFTDEK
435	1::sw|O31582|YFHO_BACSU	Uncharacterized protein YfhO OS=Bacillus subtilis (strain 168) GN=yfhO PE=4 SV=2	128	98424	38.87	VNDYVTTR
435	1::sw|O31582|YFHO_BACSU	Uncharacterized protein YfhO OS=Bacillus subtilis (strain 168) GN=yfhO PE=4 SV=2	128	98424	35.05	ANLYSLLYGK
435	1::sw|O31582|YFHO_BACSU	Uncharacterized protein YfhO OS=Bacillus subtilis (strain 168) GN=yfhO PE=4 SV=2	128	98424	20.54	TNEASVPYGFK
435	1::sw|O31582|YFHO_BACSU	Uncharacterized protein YfhO OS=Bacillus subtilis (strain 168) GN=yfhO PE=4 SV=2	128	98424	99.2	YALSEGGDLDSVTK
750	1::sw|O31583|YFHP_BACSU	Uncharacterized protein YfhP OS=Bacillus subtilis (strain 168) GN=yfhP PE=2 SV=1	34	37104	21.64	VPVPETDVMHAAK
750	1::sw|O31583|YFHP_BACSU	Uncharacterized protein YfhP OS=Bacillus subtilis (strain 168) GN=yfhP PE=2 SV=1	34	37104	29.51	SSYTGWIFSEEK
19	1::sw|O31593|YHBJ_BACSU	Putative efflux system component YhbJ OS=Bacillus subtilis (strain 168) GN=yhbJ PE=3 SV=1	3083	23608	25.12	GEQTVDVK
19	1::sw|O31593|YHBJ_BACSU	Putative efflux system component YhbJ OS=Bacillus subtilis (strain 168) GN=yhbJ PE=3 SV=1	3083	23608	36.88	GEQTVDVK
19	1::sw|O31593|YHBJ_BACSU	Putative efflux system component YhbJ OS=Bacillus subtilis (strain 168) GN=yhbJ PE=3 SV=1	3083	23608	18.56	VPVKISIK
19	1::sw|O31593|YHBJ_BACSU	Putative efflux system component YhbJ OS=Bacillus subtilis (strain 168) GN=yhbJ PE=3 SV=1	3083	23608	35.84	SIMDGTIVK
19	1::sw|O31593|YHBJ_BACSU	Putative efflux system component YhbJ OS=Bacillus subtilis (strain 168) GN=yhbJ PE=3 SV=1	3083	23608	34.33	SIMDGTIVK
19	1::sw|O31593|YHBJ_BACSU	Putative efflux system component YhbJ OS=Bacillus subtilis (strain 168) GN=yhbJ PE=3 SV=1	3083	23608	57.92	SIMDGTIVK
19	1::sw|O31593|YHBJ_BACSU	Putative efflux system component YhbJ OS=Bacillus subtilis (strain 168) GN=yhbJ PE=3 SV=1	3083	23608	38.72	SIMDGTIVK
19	1::sw|O31593|YHBJ_BACSU	Putative efflux system component YhbJ OS=Bacillus subtilis (strain 168) GN=yhbJ PE=3 SV=1	3083	23608	30.06	SIMDGTIVK
19	1::sw|O31593|YHBJ_BACSU	Putative efflux system component YhbJ OS=Bacillus subtilis (strain 168) GN=yhbJ PE=3 SV=1	3083	23608	35.41	VLPGMNASVK
19	1::sw|O31593|YHBJ_BACSU	Putative efflux system component YhbJ OS=Bacillus subtilis (strain 168) GN=yhbJ PE=3 SV=1	3083	23608	25.55	VLPGMNASVK
19	1::sw|O31593|YHBJ_BACSU	Putative efflux system component YhbJ OS=Bacillus subtilis (strain 168) GN=yhbJ PE=3 SV=1	3083	23608	32.38	IKGEQTVDVK
19	1::sw|O31593|YHBJ_BACSU	Putative efflux system component YhbJ OS=Bacillus subtilis (strain 168) GN=yhbJ PE=3 SV=1	3083	23608	18.27	IKGEQTVDVK
19	1::sw|O31593|YHBJ_BACSU	Putative efflux system component YhbJ OS=Bacillus subtilis (strain 168) GN=yhbJ PE=3 SV=1	3083	23608	32.69	IKGEQTVDVK
19	1::sw|O31593|YHBJ_BACSU	Putative efflux system component YhbJ OS=Bacillus subtilis (strain 168) GN=yhbJ PE=3 SV=1	3083	23608	24.04	IKGEQTVDVK
19	1::sw|O31593|YHBJ_BACSU	Putative efflux system component YhbJ OS=Bacillus subtilis (strain 168) GN=yhbJ PE=3 SV=1	3083	23608	34.94	IKGEQTVDVK
19	1::sw|O31593|YHBJ_BACSU	Putative efflux system component YhbJ OS=Bacillus subtilis (strain 168) GN=yhbJ PE=3 SV=1	3083	23608	44.25	IKGEQTVDVK
19	1::sw|O31593|YHBJ_BACSU	Putative efflux system component YhbJ OS=Bacillus subtilis (strain 168) GN=yhbJ PE=3 SV=1	3083	23608	18.22	IKGEQTVDVK
19	1::sw|O31593|YHBJ_BACSU	Putative efflux system component YhbJ OS=Bacillus subtilis (strain 168) GN=yhbJ PE=3 SV=1	3083	23608	23.12	IKGEQTVDVK
19	1::sw|O31593|YHBJ_BACSU	Putative efflux system component YhbJ OS=Bacillus subtilis (strain 168) GN=yhbJ PE=3 SV=1	3083	23608	36.19	IKGEQTVDVK
19	1::sw|O31593|YHBJ_BACSU	Putative efflux system component YhbJ OS=Bacillus subtilis (strain 168) GN=yhbJ PE=3 SV=1	3083	23608	46.06	IKGEQTVDVK
19	1::sw|O31593|YHBJ_BACSU	Putative efflux system component YhbJ OS=Bacillus subtilis (strain 168) GN=yhbJ PE=3 SV=1	3083	23608	34.28	IKGEQTVDVK
19	1::sw|O31593|YHBJ_BACSU	Putative efflux system component YhbJ OS=Bacillus subtilis (strain 168) GN=yhbJ PE=3 SV=1	3083	23608	37.41	IKGEQTVDVK
19	1::sw|O31593|YHBJ_BACSU	Putative efflux system component YhbJ OS=Bacillus subtilis (strain 168) GN=yhbJ PE=3 SV=1	3083	23608	36.79	IKGEQTVDVK
19	1::sw|O31593|YHBJ_BACSU	Putative efflux system component YhbJ OS=Bacillus subtilis (strain 168) GN=yhbJ PE=3 SV=1	3083	23608	50.52	IKGEQTVDVK
19	1::sw|O31593|YHBJ_BACSU	Putative efflux system component YhbJ OS=Bacillus subtilis (strain 168) GN=yhbJ PE=3 SV=1	3083	23608	67.2	VSDWDLDEGK
19	1::sw|O31593|YHBJ_BACSU	Putative efflux system component YhbJ OS=Bacillus subtilis (strain 168) GN=yhbJ PE=3 SV=1	3083	23608	78.01	VSDWDLDEGK
19	1::sw|O31593|YHBJ_BACSU	Putative efflux system component YhbJ OS=Bacillus subtilis (strain 168) GN=yhbJ PE=3 SV=1	3083	23608	65.18	VSDWDLDEGK
19	1::sw|O31593|YHBJ_BACSU	Putative efflux system component YhbJ OS=Bacillus subtilis (strain 168) GN=yhbJ PE=3 SV=1	3083	23608	78.43	VSDWDLDEGK
19	1::sw|O31593|YHBJ_BACSU	Putative efflux system component YhbJ OS=Bacillus subtilis (strain 168) GN=yhbJ PE=3 SV=1	3083	23608	78.28	VSDWDLDEGK
19	1::sw|O31593|YHBJ_BACSU	Putative efflux system component YhbJ OS=Bacillus subtilis (strain 168) GN=yhbJ PE=3 SV=1	3083	23608	74.6	VSDWDLDEGK
19	1::sw|O31593|YHBJ_BACSU	Putative efflux system component YhbJ OS=Bacillus subtilis (strain 168) GN=yhbJ PE=3 SV=1	3083	23608	67.51	VSDWDLDEGK
19	1::sw|O31593|YHBJ_BACSU	Putative efflux system component YhbJ OS=Bacillus subtilis (strain 168) GN=yhbJ PE=3 SV=1	3083	23608	55.35	VSDWDLDEGK
19	1::sw|O31593|YHBJ_BACSU	Putative efflux system component YhbJ OS=Bacillus subtilis (strain 168) GN=yhbJ PE=3 SV=1	3083	23608	74.9	VSDWDLDEGK
19	1::sw|O31593|YHBJ_BACSU	Putative efflux system component YhbJ OS=Bacillus subtilis (strain 168) GN=yhbJ PE=3 SV=1	3083	23608	51.91	VSDWDLDEGK
19	1::sw|O31593|YHBJ_BACSU	Putative efflux system component YhbJ OS=Bacillus subtilis (strain 168) GN=yhbJ PE=3 SV=1	3083	23608	67.64	VSDWDLDEGK
19	1::sw|O31593|YHBJ_BACSU	Putative efflux system component YhbJ OS=Bacillus subtilis (strain 168) GN=yhbJ PE=3 SV=1	3083	23608	71.43	VSDWDLDEGK
19	1::sw|O31593|YHBJ_BACSU	Putative efflux system component YhbJ OS=Bacillus subtilis (strain 168) GN=yhbJ PE=3 SV=1	3083	23608	65.55	VSDWDLDEGK
19	1::sw|O31593|YHBJ_BACSU	Putative efflux system component YhbJ OS=Bacillus subtilis (strain 168) GN=yhbJ PE=3 SV=1	3083	23608	74.7	VSDWDLDEGK
19	1::sw|O31593|YHBJ_BACSU	Putative efflux system component YhbJ OS=Bacillus subtilis (strain 168) GN=yhbJ PE=3 SV=1	3083	23608	68.1	VSDWDLDEGK
19	1::sw|O31593|YHBJ_BACSU	Putative efflux system component YhbJ OS=Bacillus subtilis (strain 168) GN=yhbJ PE=3 SV=1	3083	23608	86.66	VAGDMAAITAPAAGK
19	1::sw|O31593|YHBJ_BACSU	Putative efflux system component YhbJ OS=Bacillus subtilis (strain 168) GN=yhbJ PE=3 SV=1	3083	23608	75.21	VAGDMAAITAPAAGK
19	1::sw|O31593|YHBJ_BACSU	Putative efflux system component YhbJ OS=Bacillus subtilis (strain 168) GN=yhbJ PE=3 SV=1	3083	23608	79.1	VAGDMAAITAPAAGK
19	1::sw|O31593|YHBJ_BACSU	Putative efflux system component YhbJ OS=Bacillus subtilis (strain 168) GN=yhbJ PE=3 SV=1	3083	23608	37.85	VAGDMAAITAPAAGK
19	1::sw|O31593|YHBJ_BACSU	Putative efflux system component YhbJ OS=Bacillus subtilis (strain 168) GN=yhbJ PE=3 SV=1	3083	23608	71.05	VAGDMAAITAPAAGK
19	1::sw|O31593|YHBJ_BACSU	Putative efflux system component YhbJ OS=Bacillus subtilis (strain 168) GN=yhbJ PE=3 SV=1	3083	23608	84.33	VAGDMAAITAPAAGK
19	1::sw|O31593|YHBJ_BACSU	Putative efflux system component YhbJ OS=Bacillus subtilis (strain 168) GN=yhbJ PE=3 SV=1	3083	23608	31.61	VAGDMAAITAPAAGK
19	1::sw|O31593|YHBJ_BACSU	Putative efflux system component YhbJ OS=Bacillus subtilis (strain 168) GN=yhbJ PE=3 SV=1	3083	23608	82.35	VAGDMAAITAPAAGK
19	1::sw|O31593|YHBJ_BACSU	Putative efflux system component YhbJ OS=Bacillus subtilis (strain 168) GN=yhbJ PE=3 SV=1	3083	23608	40.55	VAGDMAAITAPAAGK
19	1::sw|O31593|YHBJ_BACSU	Putative efflux system component YhbJ OS=Bacillus subtilis (strain 168) GN=yhbJ PE=3 SV=1	3083	23608	85.62	VAGDMAAITAPAAGK
19	1::sw|O31593|YHBJ_BACSU	Putative efflux system component YhbJ OS=Bacillus subtilis (strain 168) GN=yhbJ PE=3 SV=1	3083	23608	60.67	VAGDMAAITAPAAGK
19	1::sw|O31593|YHBJ_BACSU	Putative efflux system component YhbJ OS=Bacillus subtilis (strain 168) GN=yhbJ PE=3 SV=1	3083	23608	82.39	VAGDMAAITAPAAGK
19	1::sw|O31593|YHBJ_BACSU	Putative efflux system component YhbJ OS=Bacillus subtilis (strain 168) GN=yhbJ PE=3 SV=1	3083	23608	27.47	VAGDMAAITAPAAGK
19	1::sw|O31593|YHBJ_BACSU	Putative efflux system component YhbJ OS=Bacillus subtilis (strain 168) GN=yhbJ PE=3 SV=1	3083	23608	61.8	VAGDMAAITAPAAGK
19	1::sw|O31593|YHBJ_BACSU	Putative efflux system component YhbJ OS=Bacillus subtilis (strain 168) GN=yhbJ PE=3 SV=1	3083	23608	57.26	VAGDMAAITAPAAGK
19	1::sw|O31593|YHBJ_BACSU	Putative efflux system component YhbJ OS=Bacillus subtilis (strain 168) GN=yhbJ PE=3 SV=1	3083	23608	76.41	VAGDMAAITAPAAGK
19	1::sw|O31593|YHBJ_BACSU	Putative efflux system component YhbJ OS=Bacillus subtilis (strain 168) GN=yhbJ PE=3 SV=1	3083	23608	52.96	VAGDMAAITAPAAGK
19	1::sw|O31593|YHBJ_BACSU	Putative efflux system component YhbJ OS=Bacillus subtilis (strain 168) GN=yhbJ PE=3 SV=1	3083	23608	99.76	VAGDMAAITAPAAGK
19	1::sw|O31593|YHBJ_BACSU	Putative efflux system component YhbJ OS=Bacillus subtilis (strain 168) GN=yhbJ PE=3 SV=1	3083	23608	78.96	VAGDMAAITAPAAGK
19	1::sw|O31593|YHBJ_BACSU	Putative efflux system component YhbJ OS=Bacillus subtilis (strain 168) GN=yhbJ PE=3 SV=1	3083	23608	70.45	VAGDMAAITAPAAGK
19	1::sw|O31593|YHBJ_BACSU	Putative efflux system component YhbJ OS=Bacillus subtilis (strain 168) GN=yhbJ PE=3 SV=1	3083	23608	73.48	VAGDMAAITAPAAGK
19	1::sw|O31593|YHBJ_BACSU	Putative efflux system component YhbJ OS=Bacillus subtilis (strain 168) GN=yhbJ PE=3 SV=1	3083	23608	101.35	VAGDMAAITAPAAGK
19	1::sw|O31593|YHBJ_BACSU	Putative efflux system component YhbJ OS=Bacillus subtilis (strain 168) GN=yhbJ PE=3 SV=1	3083	23608	64.7	VAGDMAAITAPAAGK
19	1::sw|O31593|YHBJ_BACSU	Putative efflux system component YhbJ OS=Bacillus subtilis (strain 168) GN=yhbJ PE=3 SV=1	3083	23608	35.64	VAGDMAAITAPAAGK
19	1::sw|O31593|YHBJ_BACSU	Putative efflux system component YhbJ OS=Bacillus subtilis (strain 168) GN=yhbJ PE=3 SV=1	3083	23608	59.94	VAGDMAAITAPAAGK
19	1::sw|O31593|YHBJ_BACSU	Putative efflux system component YhbJ OS=Bacillus subtilis (strain 168) GN=yhbJ PE=3 SV=1	3083	23608	76.48	VAGDMAAITAPAAGK
19	1::sw|O31593|YHBJ_BACSU	Putative efflux system component YhbJ OS=Bacillus subtilis (strain 168) GN=yhbJ PE=3 SV=1	3083	23608	66.26	VAGDMAAITAPAAGK
19	1::sw|O31593|YHBJ_BACSU	Putative efflux system component YhbJ OS=Bacillus subtilis (strain 168) GN=yhbJ PE=3 SV=1	3083	23608	59.41	VAGDMAAITAPAAGK
19	1::sw|O31593|YHBJ_BACSU	Putative efflux system component YhbJ OS=Bacillus subtilis (strain 168) GN=yhbJ PE=3 SV=1	3083	23608	22.93	VAGDMAAITAPAAGK
19	1::sw|O31593|YHBJ_BACSU	Putative efflux system component YhbJ OS=Bacillus subtilis (strain 168) GN=yhbJ PE=3 SV=1	3083	23608	70.8	VAGDMAAITAPAAGK
19	1::sw|O31593|YHBJ_BACSU	Putative efflux system component YhbJ OS=Bacillus subtilis (strain 168) GN=yhbJ PE=3 SV=1	3083	23608	75.69	VAGDMAAITAPAAGK
19	1::sw|O31593|YHBJ_BACSU	Putative efflux system component YhbJ OS=Bacillus subtilis (strain 168) GN=yhbJ PE=3 SV=1	3083	23608	80.66	VAGDMAAITAPAAGK
19	1::sw|O31593|YHBJ_BACSU	Putative efflux system component YhbJ OS=Bacillus subtilis (strain 168) GN=yhbJ PE=3 SV=1	3083	23608	28.71	VAGDMAAITAPAAGK
19	1::sw|O31593|YHBJ_BACSU	Putative efflux system component YhbJ OS=Bacillus subtilis (strain 168) GN=yhbJ PE=3 SV=1	3083	23608	85.6	VAGDMAAITAPAAGK
19	1::sw|O31593|YHBJ_BACSU	Putative efflux system component YhbJ OS=Bacillus subtilis (strain 168) GN=yhbJ PE=3 SV=1	3083	23608	86.9	VAGDMAAITAPAAGK
19	1::sw|O31593|YHBJ_BACSU	Putative efflux system component YhbJ OS=Bacillus subtilis (strain 168) GN=yhbJ PE=3 SV=1	3083	23608	87.17	VAGDMAAITAPAAGK
19	1::sw|O31593|YHBJ_BACSU	Putative efflux system component YhbJ OS=Bacillus subtilis (strain 168) GN=yhbJ PE=3 SV=1	3083	23608	35.58	VAGDMAAITAPAAGK
19	1::sw|O31593|YHBJ_BACSU	Putative efflux system component YhbJ OS=Bacillus subtilis (strain 168) GN=yhbJ PE=3 SV=1	3083	23608	29.12	VAGDMAAITAPAAGK
19	1::sw|O31593|YHBJ_BACSU	Putative efflux system component YhbJ OS=Bacillus subtilis (strain 168) GN=yhbJ PE=3 SV=1	3083	23608	73.36	VAGDMAAITAPAAGK
19	1::sw|O31593|YHBJ_BACSU	Putative efflux system component YhbJ OS=Bacillus subtilis (strain 168) GN=yhbJ PE=3 SV=1	3083	23608	75.73	VAGDMAAITAPAAGK
19	1::sw|O31593|YHBJ_BACSU	Putative efflux system component YhbJ OS=Bacillus subtilis (strain 168) GN=yhbJ PE=3 SV=1	3083	23608	82.67	VAGDMAAITAPAAGK
19	1::sw|O31593|YHBJ_BACSU	Putative efflux system component YhbJ OS=Bacillus subtilis (strain 168) GN=yhbJ PE=3 SV=1	3083	23608	20.93	VAGDMAAITAPAAGK
19	1::sw|O31593|YHBJ_BACSU	Putative efflux system component YhbJ OS=Bacillus subtilis (strain 168) GN=yhbJ PE=3 SV=1	3083	23608	59.18	VAGDMAAITAPAAGK	Oxidation (M)
19	1::sw|O31593|YHBJ_BACSU	Putative efflux system component YhbJ OS=Bacillus subtilis (strain 168) GN=yhbJ PE=3 SV=1	3083	23608	69.3	VAGDMAAITAPAAGK	Oxidation (M)
19	1::sw|O31593|YHBJ_BACSU	Putative efflux system component YhbJ OS=Bacillus subtilis (strain 168) GN=yhbJ PE=3 SV=1	3083	23608	106.65	VAGDMAAITAPAAGK	Oxidation (M)
19	1::sw|O31593|YHBJ_BACSU	Putative efflux system component YhbJ OS=Bacillus subtilis (strain 168) GN=yhbJ PE=3 SV=1	3083	23608	73.6	VAGDMAAITAPAAGK	Oxidation (M)
19	1::sw|O31593|YHBJ_BACSU	Putative efflux system component YhbJ OS=Bacillus subtilis (strain 168) GN=yhbJ PE=3 SV=1	3083	23608	46.35	VAGDMAAITAPAAGK	Oxidation (M)
19	1::sw|O31593|YHBJ_BACSU	Putative efflux system component YhbJ OS=Bacillus subtilis (strain 168) GN=yhbJ PE=3 SV=1	3083	23608	37.67	VAGDMAAITAPAAGK	Oxidation (M)
623	1::sw|O31605|PEPF_BACSU	Oligoendopeptidase F homolog OS=Bacillus subtilis (strain 168) GN=yjbG PE=3 SV=2	58	77139	22.84	EGKPAVDR
623	1::sw|O31605|PEPF_BACSU	Oligoendopeptidase F homolog OS=Bacillus subtilis (strain 168) GN=yjbG PE=3 SV=2	58	77139	38.47	LYSHAIEEITK
623	1::sw|O31605|PEPF_BACSU	Oligoendopeptidase F homolog OS=Bacillus subtilis (strain 168) GN=yjbG PE=3 SV=2	58	77139	39.35	VLELDEVHIYDLYTPLVK
801	1::sw|O31612|PPNK1_BACSU	Probable inorganic polyphosphate/ATP-NAD kinase 1 OS=Bacillus subtilis (strain 168) GN=ppnK1 PE=3 SV=1	26	30222	26.34	GDGLCLSTPSGSTAYNK
738	1::sw|O31614|PRPE_BACSU	Bis(5~-nucleosyl)-tetraphosphatase PrpE [asymmetrical] OS=Bacillus subtilis (strain 168) GN=prpE PE=1 SV=1	35	27617	35.19	VLVFAGDLTDR
133	1::sw|O31615|YJBQ_BACSU	Putative Na(+)/H(+) antiporter YjbQ OS=Bacillus subtilis (strain 168) GN=yjbQ PE=3 SV=1	602	67482	36.6	YDGVILR
133	1::sw|O31615|YJBQ_BACSU	Putative Na(+)/H(+) antiporter YjbQ OS=Bacillus subtilis (strain 168) GN=yjbQ PE=3 SV=1	602	67482	37.33	YDGVILR
133	1::sw|O31615|YJBQ_BACSU	Putative Na(+)/H(+) antiporter YjbQ OS=Bacillus subtilis (strain 168) GN=yjbQ PE=3 SV=1	602	67482	39.17	GYVTDLKK
133	1::sw|O31615|YJBQ_BACSU	Putative Na(+)/H(+) antiporter YjbQ OS=Bacillus subtilis (strain 168) GN=yjbQ PE=3 SV=1	602	67482	45.69	ALIEAPGVMK
133	1::sw|O31615|YJBQ_BACSU	Putative Na(+)/H(+) antiporter YjbQ OS=Bacillus subtilis (strain 168) GN=yjbQ PE=3 SV=1	602	67482	35.86	ALIEAPGVMK
133	1::sw|O31615|YJBQ_BACSU	Putative Na(+)/H(+) antiporter YjbQ OS=Bacillus subtilis (strain 168) GN=yjbQ PE=3 SV=1	602	67482	21.63	GVDSIVPHGDTR
133	1::sw|O31615|YJBQ_BACSU	Putative Na(+)/H(+) antiporter YjbQ OS=Bacillus subtilis (strain 168) GN=yjbQ PE=3 SV=1	602	67482	26.05	GVDSIVPHGDTR
133	1::sw|O31615|YJBQ_BACSU	Putative Na(+)/H(+) antiporter YjbQ OS=Bacillus subtilis (strain 168) GN=yjbQ PE=3 SV=1	602	67482	27.45	GVDSIVPHGDTR
133	1::sw|O31615|YJBQ_BACSU	Putative Na(+)/H(+) antiporter YjbQ OS=Bacillus subtilis (strain 168) GN=yjbQ PE=3 SV=1	602	67482	28.53	EFPLTGDVIFVR
133	1::sw|O31615|YJBQ_BACSU	Putative Na(+)/H(+) antiporter YjbQ OS=Bacillus subtilis (strain 168) GN=yjbQ PE=3 SV=1	602	67482	26.14	EFPLTGDVIFVR
133	1::sw|O31615|YJBQ_BACSU	Putative Na(+)/H(+) antiporter YjbQ OS=Bacillus subtilis (strain 168) GN=yjbQ PE=3 SV=1	602	67482	52.26	EFPLTGDVIFVR
133	1::sw|O31615|YJBQ_BACSU	Putative Na(+)/H(+) antiporter YjbQ OS=Bacillus subtilis (strain 168) GN=yjbQ PE=3 SV=1	602	67482	54.16	EFPLTGDVIFVR
133	1::sw|O31615|YJBQ_BACSU	Putative Na(+)/H(+) antiporter YjbQ OS=Bacillus subtilis (strain 168) GN=yjbQ PE=3 SV=1	602	67482	56.48	EFPLTGDVIFVR
133	1::sw|O31615|YJBQ_BACSU	Putative Na(+)/H(+) antiporter YjbQ OS=Bacillus subtilis (strain 168) GN=yjbQ PE=3 SV=1	602	67482	59.3	VVHVYQENAEEK
133	1::sw|O31615|YJBQ_BACSU	Putative Na(+)/H(+) antiporter YjbQ OS=Bacillus subtilis (strain 168) GN=yjbQ PE=3 SV=1	602	67482	67.12	VVHVYQENAEEK
133	1::sw|O31615|YJBQ_BACSU	Putative Na(+)/H(+) antiporter YjbQ OS=Bacillus subtilis (strain 168) GN=yjbQ PE=3 SV=1	602	67482	58.81	VVHVYQENAEEK
133	1::sw|O31615|YJBQ_BACSU	Putative Na(+)/H(+) antiporter YjbQ OS=Bacillus subtilis (strain 168) GN=yjbQ PE=3 SV=1	602	67482	42.47	VVHVYQENAEEK
133	1::sw|O31615|YJBQ_BACSU	Putative Na(+)/H(+) antiporter YjbQ OS=Bacillus subtilis (strain 168) GN=yjbQ PE=3 SV=1	602	67482	49.1	VVHVYQENAEEK
133	1::sw|O31615|YJBQ_BACSU	Putative Na(+)/H(+) antiporter YjbQ OS=Bacillus subtilis (strain 168) GN=yjbQ PE=3 SV=1	602	67482	29.23	VVHVYQENAEEK
133	1::sw|O31615|YJBQ_BACSU	Putative Na(+)/H(+) antiporter YjbQ OS=Bacillus subtilis (strain 168) GN=yjbQ PE=3 SV=1	602	67482	24.29	VVHVYQENAEEK
133	1::sw|O31615|YJBQ_BACSU	Putative Na(+)/H(+) antiporter YjbQ OS=Bacillus subtilis (strain 168) GN=yjbQ PE=3 SV=1	602	67482	48.5	VIASVGSPEHEAALK
133	1::sw|O31615|YJBQ_BACSU	Putative Na(+)/H(+) antiporter YjbQ OS=Bacillus subtilis (strain 168) GN=yjbQ PE=3 SV=1	602	67482	71.89	VIASVGSPEHEAALK
133	1::sw|O31615|YJBQ_BACSU	Putative Na(+)/H(+) antiporter YjbQ OS=Bacillus subtilis (strain 168) GN=yjbQ PE=3 SV=1	602	67482	54.22	VIASVGSPEHEAALK
133	1::sw|O31615|YJBQ_BACSU	Putative Na(+)/H(+) antiporter YjbQ OS=Bacillus subtilis (strain 168) GN=yjbQ PE=3 SV=1	602	67482	18.82	VIASVGSPEHEAALK
133	1::sw|O31615|YJBQ_BACSU	Putative Na(+)/H(+) antiporter YjbQ OS=Bacillus subtilis (strain 168) GN=yjbQ PE=3 SV=1	602	67482	71.22	EQGISIFSILLSTK
525	1::sw|O31634|YJCL_BACSU	Uncharacterized membrane protein YjcL OS=Bacillus subtilis (strain 168) GN=yjcL PE=4 SV=1	87	43293	54.49	ADGNSGNSAESYWK
525	1::sw|O31634|YJCL_BACSU	Uncharacterized membrane protein YjcL OS=Bacillus subtilis (strain 168) GN=yjcL PE=4 SV=1	87	43293	53.3	ADGNSGNSAESYWK
253	1::sw|O31636|YJCN_BACSU	Uncharacterized protein YjcN OS=Bacillus subtilis (strain 168) GN=yjcN PE=4 SV=1	294	12053	57.68	SSDGEYEVSCGTGP
253	1::sw|O31636|YJCN_BACSU	Uncharacterized protein YjcN OS=Bacillus subtilis (strain 168) GN=yjcN PE=4 SV=1	294	12053	22.98	SSDGEYEVSCGTGP
253	1::sw|O31636|YJCN_BACSU	Uncharacterized protein YjcN OS=Bacillus subtilis (strain 168) GN=yjcN PE=4 SV=1	294	12053	18.2	DETGQTPHLCYSK
253	1::sw|O31636|YJCN_BACSU	Uncharacterized protein YjcN OS=Bacillus subtilis (strain 168) GN=yjcN PE=4 SV=1	294	12053	45.67	DETGQTPHLCYSK
253	1::sw|O31636|YJCN_BACSU	Uncharacterized protein YjcN OS=Bacillus subtilis (strain 168) GN=yjcN PE=4 SV=1	294	12053	38.54	GYPYQSYFAVLQK
253	1::sw|O31636|YJCN_BACSU	Uncharacterized protein YjcN OS=Bacillus subtilis (strain 168) GN=yjcN PE=4 SV=1	294	12053	67.84	GYPYQSYFAVLQK
253	1::sw|O31636|YJCN_BACSU	Uncharacterized protein YjcN OS=Bacillus subtilis (strain 168) GN=yjcN PE=4 SV=1	294	12053	56.39	GYPYQSYFAVLQK
253	1::sw|O31636|YJCN_BACSU	Uncharacterized protein YjcN OS=Bacillus subtilis (strain 168) GN=yjcN PE=4 SV=1	294	12053	57.18	GYPYQSYFAVLQK
253	1::sw|O31636|YJCN_BACSU	Uncharacterized protein YjcN OS=Bacillus subtilis (strain 168) GN=yjcN PE=4 SV=1	294	12053	41.16	KSSDGEYEVSCGTGP
253	1::sw|O31636|YJCN_BACSU	Uncharacterized protein YjcN OS=Bacillus subtilis (strain 168) GN=yjcN PE=4 SV=1	294	12053	65.48	EGDNESGNLYYVNWLDWK
724	1::sw|O31638|YJCP_BACSU	Uncharacterized protein YjcP OS=Bacillus subtilis (strain 168) GN=yjcP PE=4 SV=1	38	20131	38.13	ELLAFFLEK
699	1::sw|O31655|RSGI_BACSU	Anti-sigma-I factor RsgI OS=Bacillus subtilis (strain 168) GN=rsgI PE=1 SV=1	44	43620	38.58	FVTLLTPDGQFLK
699	1::sw|O31655|RSGI_BACSU	Anti-sigma-I factor RsgI OS=Bacillus subtilis (strain 168) GN=rsgI PE=1 SV=1	44	43620	25.46	FVTLLTPDGQFLK
440	1::sw|O31656|YKRK_BACSU	Uncharacterized protein YkrK OS=Bacillus subtilis (strain 168) GN=ykrK PE=4 SV=1	124	26962	60.67	VAFNTISDR
440	1::sw|O31656|YKRK_BACSU	Uncharacterized protein YkrK OS=Bacillus subtilis (strain 168) GN=ykrK PE=4 SV=1	124	26962	30.53	DLIGHPELGK
440	1::sw|O31656|YKRK_BACSU	Uncharacterized protein YkrK OS=Bacillus subtilis (strain 168) GN=ykrK PE=4 SV=1	124	26962	31.9	SIYDFEHIR
440	1::sw|O31656|YKRK_BACSU	Uncharacterized protein YkrK OS=Bacillus subtilis (strain 168) GN=ykrK PE=4 SV=1	124	26962	64.74	ESNLQEIAEQETER
260	1::sw|O31657|HTPX_BACSU	Protease HtpX homolog OS=Bacillus subtilis (strain 168) GN=htpX PE=3 SV=1	277	32845	56.12	IAAWIASR
260	1::sw|O31657|HTPX_BACSU	Protease HtpX homolog OS=Bacillus subtilis (strain 168) GN=htpX PE=3 SV=1	277	32845	43.4	MPEVGIYR
260	1::sw|O31657|HTPX_BACSU	Protease HtpX homolog OS=Bacillus subtilis (strain 168) GN=htpX PE=3 SV=1	277	32845	91.09	ILEDDQTAVQTLK
260	1::sw|O31657|HTPX_BACSU	Protease HtpX homolog OS=Bacillus subtilis (strain 168) GN=htpX PE=3 SV=1	277	32845	88.26	ILEDDQTAVQTLK
260	1::sw|O31657|HTPX_BACSU	Protease HtpX homolog OS=Bacillus subtilis (strain 168) GN=htpX PE=3 SV=1	277	32845	32.86	SSLFSTHPDLDER
260	1::sw|O31657|HTPX_BACSU	Protease HtpX homolog OS=Bacillus subtilis (strain 168) GN=htpX PE=3 SV=1	277	32845	64.62	HSLSYEEQQLVDR
260	1::sw|O31657|HTPX_BACSU	Protease HtpX homolog OS=Bacillus subtilis (strain 168) GN=htpX PE=3 SV=1	277	32845	34.58	KHSLSYEEQQLVDR
405	1::sw|O31671|KIND_BACSU	Sporulation kinase D OS=Bacillus subtilis (strain 168) GN=kinD PE=1 SV=1	148	57011	48.65	FSGLYFLNAK
405	1::sw|O31671|KIND_BACSU	Sporulation kinase D OS=Bacillus subtilis (strain 168) GN=kinD PE=1 SV=1	148	57011	36.12	INQIVSEFLVLGK
405	1::sw|O31671|KIND_BACSU	Sporulation kinase D OS=Bacillus subtilis (strain 168) GN=kinD PE=1 SV=1	148	57011	36.64	NPLTGISGFIQLLQK
405	1::sw|O31671|KIND_BACSU	Sporulation kinase D OS=Bacillus subtilis (strain 168) GN=kinD PE=1 SV=1	148	57011	83.12	LELIGTLAASTAHEIR
405	1::sw|O31671|KIND_BACSU	Sporulation kinase D OS=Bacillus subtilis (strain 168) GN=kinD PE=1 SV=1	148	57011	19.18	INQIVSEFLVLGKPTAEK
203	1::sw|O31673|CLPE_BACSU	ATP-dependent Clp protease ATP-binding subunit ClpE OS=Bacillus subtilis (strain 168) GN=clpE PE=1 SV=1	360	78143	59.77	AIDLLDEAGSK
203	1::sw|O31673|CLPE_BACSU	ATP-dependent Clp protease ATP-binding subunit ClpE OS=Bacillus subtilis (strain 168) GN=clpE PE=1 SV=1	360	78143	53.78	AIDLLDEAGSK
203	1::sw|O31673|CLPE_BACSU	ATP-dependent Clp protease ATP-binding subunit ClpE OS=Bacillus subtilis (strain 168) GN=clpE PE=1 SV=1	360	78143	24.51	AIDLLDEAGSK
203	1::sw|O31673|CLPE_BACSU	ATP-dependent Clp protease ATP-binding subunit ClpE OS=Bacillus subtilis (strain 168) GN=clpE PE=1 SV=1	360	78143	58.78	LDMSEYMEK
203	1::sw|O31673|CLPE_BACSU	ATP-dependent Clp protease ATP-binding subunit ClpE OS=Bacillus subtilis (strain 168) GN=clpE PE=1 SV=1	360	78143	31.89	LDMSEYMEK
203	1::sw|O31673|CLPE_BACSU	ATP-dependent Clp protease ATP-binding subunit ClpE OS=Bacillus subtilis (strain 168) GN=clpE PE=1 SV=1	360	78143	60.83	NNPVLIGEPGVGK
203	1::sw|O31673|CLPE_BACSU	ATP-dependent Clp protease ATP-binding subunit ClpE OS=Bacillus subtilis (strain 168) GN=clpE PE=1 SV=1	360	78143	55.31	NNPVLIGEPGVGK
203	1::sw|O31673|CLPE_BACSU	ATP-dependent Clp protease ATP-binding subunit ClpE OS=Bacillus subtilis (strain 168) GN=clpE PE=1 SV=1	360	78143	31.31	NNPVLIGEPGVGK
203	1::sw|O31673|CLPE_BACSU	ATP-dependent Clp protease ATP-binding subunit ClpE OS=Bacillus subtilis (strain 168) GN=clpE PE=1 SV=1	360	78143	26	NNPVLIGEPGVGK
203	1::sw|O31673|CLPE_BACSU	ATP-dependent Clp protease ATP-binding subunit ClpE OS=Bacillus subtilis (strain 168) GN=clpE PE=1 SV=1	360	78143	76.71	NNPVLIGEPGVGK
203	1::sw|O31673|CLPE_BACSU	ATP-dependent Clp protease ATP-binding subunit ClpE OS=Bacillus subtilis (strain 168) GN=clpE PE=1 SV=1	360	78143	57.49	NNPVLIGEPGVGK
203	1::sw|O31673|CLPE_BACSU	ATP-dependent Clp protease ATP-binding subunit ClpE OS=Bacillus subtilis (strain 168) GN=clpE PE=1 SV=1	360	78143	35.17	NNPVLIGEPGVGK
203	1::sw|O31673|CLPE_BACSU	ATP-dependent Clp protease ATP-binding subunit ClpE OS=Bacillus subtilis (strain 168) GN=clpE PE=1 SV=1	360	78143	39.43	NPYSIVLLDEIEK
203	1::sw|O31673|CLPE_BACSU	ATP-dependent Clp protease ATP-binding subunit ClpE OS=Bacillus subtilis (strain 168) GN=clpE PE=1 SV=1	360	78143	34.65	NPYSIVLLDEIEK
203	1::sw|O31673|CLPE_BACSU	ATP-dependent Clp protease ATP-binding subunit ClpE OS=Bacillus subtilis (strain 168) GN=clpE PE=1 SV=1	360	78143	19.98	RNPYSIVLLDEIEK
589	1::sw|O31675|QUEC_BACSU	7-cyano-7-deazaguanine synthase OS=Bacillus subtilis (strain 168) GN=queC PE=1 SV=1	64	24969	64.43	LADELGALDFVK
533	1::sw|O31689|YKVY_BACSU	Putative dipeptidase YkvY OS=Bacillus subtilis (strain 168) GN=ykvY PE=3 SV=1	85	40423	55.24	IGDLDLTAR
533	1::sw|O31689|YKVY_BACSU	Putative dipeptidase YkvY OS=Bacillus subtilis (strain 168) GN=ykvY PE=3 SV=1	85	40423	46.65	AAIEASKPGVR
533	1::sw|O31689|YKVY_BACSU	Putative dipeptidase YkvY OS=Bacillus subtilis (strain 168) GN=ykvY PE=3 SV=1	85	40423	23.72	SGQPHGNPGTATLK
773	1::sw|O31709|YKNW_BACSU	Uncharacterized protein YknW OS=Bacillus subtilis (strain 168) GN=yknW PE=4 SV=1	31	24217	30.52	NSGTATEKPSLFGVITSPSVQFER
639	1::sw|O31710|YKNX_BACSU	Putative efflux system component YknX OS=Bacillus subtilis (strain 168) GN=yknX PE=1 SV=1	55	41682	28.23	LQIDQIQEK
639	1::sw|O31710|YKNX_BACSU	Putative efflux system component YknX OS=Bacillus subtilis (strain 168) GN=yknX PE=1 SV=1	55	41682	47.52	EQNQLTSESNR
560	1::sw|O31712|YKNZ_BACSU	Uncharacterized ABC transporter permease YknZ OS=Bacillus subtilis (strain 168) GN=yknZ PE=1 SV=1	73	42155	29.41	LDPIEALR
560	1::sw|O31712|YKNZ_BACSU	Uncharacterized ABC transporter permease YknZ OS=Bacillus subtilis (strain 168) GN=yknZ PE=1 SV=1	73	42155	31.19	QVVASTSESMK
560	1::sw|O31712|YKNZ_BACSU	Uncharacterized ABC transporter permease YknZ OS=Bacillus subtilis (strain 168) GN=yknZ PE=1 SV=1	73	42155	56.93	TFTDNDFLAGNR
245	1::sw|O31716|YKPA_BACSU	Uncharacterized ABC transporter ATP-binding protein YkpA OS=Bacillus subtilis (strain 168) GN=ykpA PE=3 SV=1	305	61188	31.61	QLQEFVAR
245	1::sw|O31716|YKPA_BACSU	Uncharacterized ABC transporter ATP-binding protein YkpA OS=Bacillus subtilis (strain 168) GN=ykpA PE=3 SV=1	305	61188	38.61	MIAVNNVSLR
245	1::sw|O31716|YKPA_BACSU	Uncharacterized ABC transporter ATP-binding protein YkpA OS=Bacillus subtilis (strain 168) GN=ykpA PE=3 SV=1	305	61188	71.9	NELAVTTLFK
245	1::sw|O31716|YKPA_BACSU	Uncharacterized ABC transporter ATP-binding protein YkpA OS=Bacillus subtilis (strain 168) GN=ykpA PE=3 SV=1	305	61188	45.55	GLGISEDLHTK
245	1::sw|O31716|YKPA_BACSU	Uncharacterized ABC transporter ATP-binding protein YkpA OS=Bacillus subtilis (strain 168) GN=ykpA PE=3 SV=1	305	61188	30.81	MLFSGEEVHK
245	1::sw|O31716|YKPA_BACSU	Uncharacterized ABC transporter ATP-binding protein YkpA OS=Bacillus subtilis (strain 168) GN=ykpA PE=3 SV=1	305	61188	43.93	ITLDDIKPSSR
245	1::sw|O31716|YKPA_BACSU	Uncharacterized ABC transporter ATP-binding protein YkpA OS=Bacillus subtilis (strain 168) GN=ykpA PE=3 SV=1	305	61188	34.1	ITLDDIKPSSR
245	1::sw|O31716|YKPA_BACSU	Uncharacterized ABC transporter ATP-binding protein YkpA OS=Bacillus subtilis (strain 168) GN=ykpA PE=3 SV=1	305	61188	28.25	WGVTTSQAYFPK
245	1::sw|O31716|YKPA_BACSU	Uncharacterized ABC transporter ATP-binding protein YkpA OS=Bacillus subtilis (strain 168) GN=ykpA PE=3 SV=1	305	61188	54.37	VCTHIADLDFNK
245	1::sw|O31716|YKPA_BACSU	Uncharacterized ABC transporter ATP-binding protein YkpA OS=Bacillus subtilis (strain 168) GN=ykpA PE=3 SV=1	305	61188	35.98	VCTHIADLDFNK
245	1::sw|O31716|YKPA_BACSU	Uncharacterized ABC transporter ATP-binding protein YkpA OS=Bacillus subtilis (strain 168) GN=ykpA PE=3 SV=1	305	61188	102.68	IISGEMEADSGTFK
473	1::sw|O31717|YKPB_BACSU	Uncharacterized oxidoreductase YkpB OS=Bacillus subtilis (strain 168) GN=ykpB PE=3 SV=1	108	33665	24	TGLVIHSEK
473	1::sw|O31717|YKPB_BACSU	Uncharacterized oxidoreductase YkpB OS=Bacillus subtilis (strain 168) GN=ykpB PE=3 SV=1	108	33665	61.2	GNDVTFLVR
473	1::sw|O31717|YKPB_BACSU	Uncharacterized oxidoreductase YkpB OS=Bacillus subtilis (strain 168) GN=ykpB PE=3 SV=1	108	33665	57.3	ALEEAFSGVK
473	1::sw|O31717|YKPB_BACSU	Uncharacterized oxidoreductase YkpB OS=Bacillus subtilis (strain 168) GN=ykpB PE=3 SV=1	108	33665	27.34	PLGPILATEAGR
473	1::sw|O31717|YKPB_BACSU	Uncharacterized oxidoreductase YkpB OS=Bacillus subtilis (strain 168) GN=ykpB PE=3 SV=1	108	33665	18.75	GEIHHTSASHR
847	1::sw|O31727|YLME_BACSU	UPF0001 protein YlmE OS=Bacillus subtilis (strain 168) GN=ylmE PE=3 SV=1	20	25973	20.21	SSDEVTVIAVTK
363	1::sw|O31729|YLMG_BACSU	Uncharacterized membrane protein YlmG OS=Bacillus subtilis (strain 168) GN=ylmG PE=3 SV=1	181	10358	75.61	FATTGLWGLYR
363	1::sw|O31729|YLMG_BACSU	Uncharacterized membrane protein YlmG OS=Bacillus subtilis (strain 168) GN=ylmG PE=3 SV=1	181	10358	75.83	FATTGLWGLYR
363	1::sw|O31729|YLMG_BACSU	Uncharacterized membrane protein YlmG OS=Bacillus subtilis (strain 168) GN=ylmG PE=3 SV=1	181	10358	49.58	FLASICEPYLEPFR
363	1::sw|O31729|YLMG_BACSU	Uncharacterized membrane protein YlmG OS=Bacillus subtilis (strain 168) GN=ylmG PE=3 SV=1	181	10358	23.78	FLASICEPYLEPFR
363	1::sw|O31729|YLMG_BACSU	Uncharacterized membrane protein YlmG OS=Bacillus subtilis (strain 168) GN=ylmG PE=3 SV=1	181	10358	32.46	FLASICEPYLEPFR
363	1::sw|O31729|YLMG_BACSU	Uncharacterized membrane protein YlmG OS=Bacillus subtilis (strain 168) GN=ylmG PE=3 SV=1	181	10358	28.38	FLASICEPYLEPFRK
363	1::sw|O31729|YLMG_BACSU	Uncharacterized membrane protein YlmG OS=Bacillus subtilis (strain 168) GN=ylmG PE=3 SV=1	181	10358	25.93	IIPPIAMLDISPIVAILVLR	Oxidation (M)
166	1::sw|O31742|RL19_BACSU	50S ribosomal protein L19 OS=Bacillus subtilis (strain 168) GN=rplS PE=1 SV=2	451	13379	29.58	TDLPAFR
166	1::sw|O31742|RL19_BACSU	50S ribosomal protein L19 OS=Bacillus subtilis (strain 168) GN=rplS PE=1 SV=2	451	13379	19.66	TDLPAFR
166	1::sw|O31742|RL19_BACSU	50S ribosomal protein L19 OS=Bacillus subtilis (strain 168) GN=rplS PE=1 SV=2	451	13379	20.2	TFPVHTPK
166	1::sw|O31742|RL19_BACSU	50S ribosomal protein L19 OS=Bacillus subtilis (strain 168) GN=rplS PE=1 SV=2	451	13379	22.15	ISYGVGVER
166	1::sw|O31742|RL19_BACSU	50S ribosomal protein L19 OS=Bacillus subtilis (strain 168) GN=rplS PE=1 SV=2	451	13379	46.88	ISYGVGVER
166	1::sw|O31742|RL19_BACSU	50S ribosomal protein L19 OS=Bacillus subtilis (strain 168) GN=rplS PE=1 SV=2	451	13379	42.09	ISYGVGVER
166	1::sw|O31742|RL19_BACSU	50S ribosomal protein L19 OS=Bacillus subtilis (strain 168) GN=rplS PE=1 SV=2	451	13379	66.23	ISYGVGVER
166	1::sw|O31742|RL19_BACSU	50S ribosomal protein L19 OS=Bacillus subtilis (strain 168) GN=rplS PE=1 SV=2	451	13379	69.13	ISYGVGVER
166	1::sw|O31742|RL19_BACSU	50S ribosomal protein L19 OS=Bacillus subtilis (strain 168) GN=rplS PE=1 SV=2	451	13379	39.55	KISYGVGVER
166	1::sw|O31742|RL19_BACSU	50S ribosomal protein L19 OS=Bacillus subtilis (strain 168) GN=rplS PE=1 SV=2	451	13379	18.35	KISYGVGVER
166	1::sw|O31742|RL19_BACSU	50S ribosomal protein L19 OS=Bacillus subtilis (strain 168) GN=rplS PE=1 SV=2	451	13379	27.08	GGGISETFTVR
166	1::sw|O31742|RL19_BACSU	50S ribosomal protein L19 OS=Bacillus subtilis (strain 168) GN=rplS PE=1 SV=2	451	13379	49.08	GGGISETFTVR
166	1::sw|O31742|RL19_BACSU	50S ribosomal protein L19 OS=Bacillus subtilis (strain 168) GN=rplS PE=1 SV=2	451	13379	70.76	GGGISETFTVR
166	1::sw|O31742|RL19_BACSU	50S ribosomal protein L19 OS=Bacillus subtilis (strain 168) GN=rplS PE=1 SV=2	451	13379	37.75	IQIFEGVVIK
166	1::sw|O31742|RL19_BACSU	50S ribosomal protein L19 OS=Bacillus subtilis (strain 168) GN=rplS PE=1 SV=2	451	13379	28.56	IQIFEGVVIK
166	1::sw|O31742|RL19_BACSU	50S ribosomal protein L19 OS=Bacillus subtilis (strain 168) GN=rplS PE=1 SV=2	451	13379	39.84	IQIFEGVVIK
166	1::sw|O31742|RL19_BACSU	50S ribosomal protein L19 OS=Bacillus subtilis (strain 168) GN=rplS PE=1 SV=2	451	13379	81.65	IQIFEGVVIK
166	1::sw|O31742|RL19_BACSU	50S ribosomal protein L19 OS=Bacillus subtilis (strain 168) GN=rplS PE=1 SV=2	451	13379	33.7	IQIFEGVVIK
166	1::sw|O31742|RL19_BACSU	50S ribosomal protein L19 OS=Bacillus subtilis (strain 168) GN=rplS PE=1 SV=2	451	13379	65.2	IQIFEGVVIK
166	1::sw|O31742|RL19_BACSU	50S ribosomal protein L19 OS=Bacillus subtilis (strain 168) GN=rplS PE=1 SV=2	451	13379	58.78	IQIFEGVVIK
166	1::sw|O31742|RL19_BACSU	50S ribosomal protein L19 OS=Bacillus subtilis (strain 168) GN=rplS PE=1 SV=2	451	13379	26.02	TDLPAFRPGDTLR
166	1::sw|O31742|RL19_BACSU	50S ribosomal protein L19 OS=Bacillus subtilis (strain 168) GN=rplS PE=1 SV=2	451	13379	19.59	TDLPAFRPGDTLR
166	1::sw|O31742|RL19_BACSU	50S ribosomal protein L19 OS=Bacillus subtilis (strain 168) GN=rplS PE=1 SV=2	451	13379	18.66	TDLPAFRPGDTLR
375	1::sw|O31743|RBGA_BACSU	Ribosome biogenesis GTPase A OS=Bacillus subtilis (strain 168) GN=rbgA PE=1 SV=1	169	32023	20.06	TTEVIIR
375	1::sw|O31743|RBGA_BACSU	Ribosome biogenesis GTPase A OS=Bacillus subtilis (strain 168) GN=rbgA PE=1 SV=1	169	32023	38.75	ALIIGIPNVGK
375	1::sw|O31743|RBGA_BACSU	Ribosome biogenesis GTPase A OS=Bacillus subtilis (strain 168) GN=rbgA PE=1 SV=1	169	32023	34.19	ADAAVTQQWK
375	1::sw|O31743|RBGA_BACSU	Ribosome biogenesis GTPase A OS=Bacillus subtilis (strain 168) GN=rbgA PE=1 SV=1	169	32023	24.2	EHFENQGIR
375	1::sw|O31743|RBGA_BACSU	Ribosome biogenesis GTPase A OS=Bacillus subtilis (strain 168) GN=rbgA PE=1 SV=1	169	32023	20.64	FLEEHYPER
375	1::sw|O31743|RBGA_BACSU	Ribosome biogenesis GTPase A OS=Bacillus subtilis (strain 168) GN=rbgA PE=1 SV=1	169	32023	73.78	LIDIVYELVDAR
375	1::sw|O31743|RBGA_BACSU	Ribosome biogenesis GTPase A OS=Bacillus subtilis (strain 168) GN=rbgA PE=1 SV=1	169	32023	60.74	LIDIVYELVDAR
375	1::sw|O31743|RBGA_BACSU	Ribosome biogenesis GTPase A OS=Bacillus subtilis (strain 168) GN=rbgA PE=1 SV=1	169	32023	32.74	DSIINLQDVAVFGLR
375	1::sw|O31743|RBGA_BACSU	Ribosome biogenesis GTPase A OS=Bacillus subtilis (strain 168) GN=rbgA PE=1 SV=1	169	32023	28.9	TGDRPGITTSQQWVK
356	1::sw|O31749|PYRH_BACSU	Uridylate kinase OS=Bacillus subtilis (strain 168) GN=pyrH PE=1 SV=2	188	26124	47.66	TGSDLGMDR
356	1::sw|O31749|PYRH_BACSU	Uridylate kinase OS=Bacillus subtilis (strain 168) GN=pyrH PE=1 SV=2	188	26124	34.9	VQTSIEMR
356	1::sw|O31749|PYRH_BACSU	Uridylate kinase OS=Bacillus subtilis (strain 168) GN=pyrH PE=1 SV=2	188	26124	61.97	AVIGESIGTIVR
356	1::sw|O31749|PYRH_BACSU	Uridylate kinase OS=Bacillus subtilis (strain 168) GN=pyrH PE=1 SV=2	188	26124	57.51	YESLSYLDVLK
356	1::sw|O31749|PYRH_BACSU	Uridylate kinase OS=Bacillus subtilis (strain 168) GN=pyrH PE=1 SV=2	188	26124	77.32	NNVDGVYNADPR
680	1::sw|O31751|ISPT_BACSU	Isoprenyl transferase OS=Bacillus subtilis (strain 168) GN=uppS PE=3 SV=1	47	29758	47.34	IIGDETALPAHTLR
743	1::sw|O31752|CDSA_BACSU	Phosphatidate cytidylyltransferase OS=Bacillus subtilis (strain 168) GN=cdsA PE=3 SV=1	35	30306	19.33	KLWPEISPNK
743	1::sw|O31752|CDSA_BACSU	Phosphatidate cytidylyltransferase OS=Bacillus subtilis (strain 168) GN=cdsA PE=3 SV=1	35	30306	33.56	KLWPEISPNK
313	1::sw|O31753|DXR_BACSU	1-deoxy-D-xylulose 5-phosphate reductoisomerase OS=Bacillus subtilis (strain 168) GN=dxr PE=3 SV=2	223	42738	41.03	LIITASGGSFR
313	1::sw|O31753|DXR_BACSU	1-deoxy-D-xylulose 5-phosphate reductoisomerase OS=Bacillus subtilis (strain 168) GN=dxr PE=3 SV=2	223	42738	51.51	LIITASGGSFR
313	1::sw|O31753|DXR_BACSU	1-deoxy-D-xylulose 5-phosphate reductoisomerase OS=Bacillus subtilis (strain 168) GN=dxr PE=3 SV=2	223	42738	18.71	ETLVTAGHIVK
313	1::sw|O31753|DXR_BACSU	1-deoxy-D-xylulose 5-phosphate reductoisomerase OS=Bacillus subtilis (strain 168) GN=dxr PE=3 SV=2	223	42738	29.84	ETLVTAGHIVK
313	1::sw|O31753|DXR_BACSU	1-deoxy-D-xylulose 5-phosphate reductoisomerase OS=Bacillus subtilis (strain 168) GN=dxr PE=3 SV=2	223	42738	40.36	SVIAQLGTPDMR
313	1::sw|O31753|DXR_BACSU	1-deoxy-D-xylulose 5-phosphate reductoisomerase OS=Bacillus subtilis (strain 168) GN=dxr PE=3 SV=2	223	42738	47.36	FVSVGDLDTYHK
313	1::sw|O31753|DXR_BACSU	1-deoxy-D-xylulose 5-phosphate reductoisomerase OS=Bacillus subtilis (strain 168) GN=dxr PE=3 SV=2	223	42738	54.49	FVSVGDLDTYHK
313	1::sw|O31753|DXR_BACSU	1-deoxy-D-xylulose 5-phosphate reductoisomerase OS=Bacillus subtilis (strain 168) GN=dxr PE=3 SV=2	223	42738	25.78	VPIQYALTYPDR
313	1::sw|O31753|DXR_BACSU	1-deoxy-D-xylulose 5-phosphate reductoisomerase OS=Bacillus subtilis (strain 168) GN=dxr PE=3 SV=2	223	42738	40.32	IPFLAIEDCIEK
313	1::sw|O31753|DXR_BACSU	1-deoxy-D-xylulose 5-phosphate reductoisomerase OS=Bacillus subtilis (strain 168) GN=dxr PE=3 SV=2	223	42738	47.16	IPFLAIEDCIEK
147	1::sw|O31754|RASP_BACSU	Zinc metalloprotease RasP OS=Bacillus subtilis (strain 168) GN=rasP PE=1 SV=1	548	46771	24.72	AILTNLSK
147	1::sw|O31754|RASP_BACSU	Zinc metalloprotease RasP OS=Bacillus subtilis (strain 168) GN=rasP PE=1 SV=1	548	46771	27.57	AILTNLSK
147	1::sw|O31754|RASP_BACSU	Zinc metalloprotease RasP OS=Bacillus subtilis (strain 168) GN=rasP PE=1 SV=1	548	46771	24.54	LLPVGGFVR
147	1::sw|O31754|RASP_BACSU	Zinc metalloprotease RasP OS=Bacillus subtilis (strain 168) GN=rasP PE=1 SV=1	548	46771	41.74	EFAIGFGPK
147	1::sw|O31754|RASP_BACSU	Zinc metalloprotease RasP OS=Bacillus subtilis (strain 168) GN=rasP PE=1 SV=1	548	46771	25.97	NETVYTIR
147	1::sw|O31754|RASP_BACSU	Zinc metalloprotease RasP OS=Bacillus subtilis (strain 168) GN=rasP PE=1 SV=1	548	46771	18.92	FGSYAPTEK
147	1::sw|O31754|RASP_BACSU	Zinc metalloprotease RasP OS=Bacillus subtilis (strain 168) GN=rasP PE=1 SV=1	548	46771	35.75	FGSYAPTEK
147	1::sw|O31754|RASP_BACSU	Zinc metalloprotease RasP OS=Bacillus subtilis (strain 168) GN=rasP PE=1 SV=1	548	46771	44.39	FGSYAPTEK
147	1::sw|O31754|RASP_BACSU	Zinc metalloprotease RasP OS=Bacillus subtilis (strain 168) GN=rasP PE=1 SV=1	548	46771	45.93	SWTDIVSAVK
147	1::sw|O31754|RASP_BACSU	Zinc metalloprotease RasP OS=Bacillus subtilis (strain 168) GN=rasP PE=1 SV=1	548	46771	56.19	SWTDIVSAVK
147	1::sw|O31754|RASP_BACSU	Zinc metalloprotease RasP OS=Bacillus subtilis (strain 168) GN=rasP PE=1 SV=1	548	46771	56.4	KNETVYTIR
147	1::sw|O31754|RASP_BACSU	Zinc metalloprotease RasP OS=Bacillus subtilis (strain 168) GN=rasP PE=1 SV=1	548	46771	69.23	LLFLFIEAIR
147	1::sw|O31754|RASP_BACSU	Zinc metalloprotease RasP OS=Bacillus subtilis (strain 168) GN=rasP PE=1 SV=1	548	46771	72.65	LLFLFIEAIR
147	1::sw|O31754|RASP_BACSU	Zinc metalloprotease RasP OS=Bacillus subtilis (strain 168) GN=rasP PE=1 SV=1	548	46771	53.48	EGDYIQSINGEK
147	1::sw|O31754|RASP_BACSU	Zinc metalloprotease RasP OS=Bacillus subtilis (strain 168) GN=rasP PE=1 SV=1	548	46771	53.05	EGDYIQSINGEK
147	1::sw|O31754|RASP_BACSU	Zinc metalloprotease RasP OS=Bacillus subtilis (strain 168) GN=rasP PE=1 SV=1	548	46771	31.63	EGDYIQSINGEK
147	1::sw|O31754|RASP_BACSU	Zinc metalloprotease RasP OS=Bacillus subtilis (strain 168) GN=rasP PE=1 SV=1	548	46771	39.26	EGDYIQSINGEK
147	1::sw|O31754|RASP_BACSU	Zinc metalloprotease RasP OS=Bacillus subtilis (strain 168) GN=rasP PE=1 SV=1	548	46771	80.83	GVLSAVAYGATSTVDVTK
147	1::sw|O31754|RASP_BACSU	Zinc metalloprotease RasP OS=Bacillus subtilis (strain 168) GN=rasP PE=1 SV=1	548	46771	68.56	GVLSAVAYGATSTVDVTK
147	1::sw|O31754|RASP_BACSU	Zinc metalloprotease RasP OS=Bacillus subtilis (strain 168) GN=rasP PE=1 SV=1	548	46771	64.36	LDMLSGPVGIYDMTDQVAK
147	1::sw|O31754|RASP_BACSU	Zinc metalloprotease RasP OS=Bacillus subtilis (strain 168) GN=rasP PE=1 SV=1	548	46771	27.18	EKYPDALVIEVETADLEHDMK
147	1::sw|O31754|RASP_BACSU	Zinc metalloprotease RasP OS=Bacillus subtilis (strain 168) GN=rasP PE=1 SV=1	548	46771	44.24	MAGEDPEMIEVKPGYTVGLLFNK
269	1::sw|O31755|SYP_BACSU	Proline--tRNA ligase OS=Bacillus subtilis (strain 168) GN=proS PE=3 SV=1	270	63436	44.25	FVLVLVR
269	1::sw|O31755|SYP_BACSU	Proline--tRNA ligase OS=Bacillus subtilis (strain 168) GN=proS PE=3 SV=1	270	63436	21.43	SHQLLLR
269	1::sw|O31755|SYP_BACSU	Proline--tRNA ligase OS=Bacillus subtilis (strain 168) GN=proS PE=3 SV=1	270	63436	21.81	GDHEVNDIK
269	1::sw|O31755|SYP_BACSU	Proline--tRNA ligase OS=Bacillus subtilis (strain 168) GN=proS PE=3 SV=1	270	63436	76.7	VIQNIQQIVR
269	1::sw|O31755|SYP_BACSU	Proline--tRNA ligase OS=Bacillus subtilis (strain 168) GN=proS PE=3 SV=1	270	63436	55.16	VIQNIQQIVR
269	1::sw|O31755|SYP_BACSU	Proline--tRNA ligase OS=Bacillus subtilis (strain 168) GN=proS PE=3 SV=1	270	63436	61.81	FADSDLIGLPIR
269	1::sw|O31755|SYP_BACSU	Proline--tRNA ligase OS=Bacillus subtilis (strain 168) GN=proS PE=3 SV=1	270	63436	19.52	FADSDLIGLPIR
269	1::sw|O31755|SYP_BACSU	Proline--tRNA ligase OS=Bacillus subtilis (strain 168) GN=proS PE=3 SV=1	270	63436	58.18	AEGYEVLYDDR
269	1::sw|O31755|SYP_BACSU	Proline--tRNA ligase OS=Bacillus subtilis (strain 168) GN=proS PE=3 SV=1	270	63436	64.58	AEGYEVLYDDR
269	1::sw|O31755|SYP_BACSU	Proline--tRNA ligase OS=Bacillus subtilis (strain 168) GN=proS PE=3 SV=1	270	63436	38.84	QNTSGVYSYMPLAYK
37	1::sw|O31760|RNJ2_BACSU	Ribonuclease J 2 OS=Bacillus subtilis (strain 168) GN=rnjB PE=1 SV=3	1832	61251	34.98	LTLALLR
37	1::sw|O31760|RNJ2_BACSU	Ribonuclease J 2 OS=Bacillus subtilis (strain 168) GN=rnjB PE=1 SV=3	1832	61251	22.24	IAEETGMK
37	1::sw|O31760|RNJ2_BACSU	Ribonuclease J 2 OS=Bacillus subtilis (strain 168) GN=rnjB PE=1 SV=3	1832	61251	18.27	LSVPVYGTK
37	1::sw|O31760|RNJ2_BACSU	Ribonuclease J 2 OS=Bacillus subtilis (strain 168) GN=rnjB PE=1 SV=3	1832	61251	32.38	LSVPVYGTK
37	1::sw|O31760|RNJ2_BACSU	Ribonuclease J 2 OS=Bacillus subtilis (strain 168) GN=rnjB PE=1 SV=3	1832	61251	25.15	LSVPVYGTK
37	1::sw|O31760|RNJ2_BACSU	Ribonuclease J 2 OS=Bacillus subtilis (strain 168) GN=rnjB PE=1 SV=3	1832	61251	25.1	LSVPVYGTK
37	1::sw|O31760|RNJ2_BACSU	Ribonuclease J 2 OS=Bacillus subtilis (strain 168) GN=rnjB PE=1 SV=3	1832	61251	57.8	SDIFLIEK
37	1::sw|O31760|RNJ2_BACSU	Ribonuclease J 2 OS=Bacillus subtilis (strain 168) GN=rnjB PE=1 SV=3	1832	61251	25.84	SDIFLIEK
37	1::sw|O31760|RNJ2_BACSU	Ribonuclease J 2 OS=Bacillus subtilis (strain 168) GN=rnjB PE=1 SV=3	1832	61251	39.32	SVITFESTK
37	1::sw|O31760|RNJ2_BACSU	Ribonuclease J 2 OS=Bacillus subtilis (strain 168) GN=rnjB PE=1 SV=3	1832	61251	31.04	SVITFESTK
37	1::sw|O31760|RNJ2_BACSU	Ribonuclease J 2 OS=Bacillus subtilis (strain 168) GN=rnjB PE=1 SV=3	1832	61251	33.85	SVITFESTK
37	1::sw|O31760|RNJ2_BACSU	Ribonuclease J 2 OS=Bacillus subtilis (strain 168) GN=rnjB PE=1 SV=3	1832	61251	54.72	SVITFESTK
37	1::sw|O31760|RNJ2_BACSU	Ribonuclease J 2 OS=Bacillus subtilis (strain 168) GN=rnjB PE=1 SV=3	1832	61251	18.31	AGAQVIFAQK
37	1::sw|O31760|RNJ2_BACSU	Ribonuclease J 2 OS=Bacillus subtilis (strain 168) GN=rnjB PE=1 SV=3	1832	61251	53.75	AGAQVIFAQK
37	1::sw|O31760|RNJ2_BACSU	Ribonuclease J 2 OS=Bacillus subtilis (strain 168) GN=rnjB PE=1 SV=3	1832	61251	43.83	AGAQVIFAQK
37	1::sw|O31760|RNJ2_BACSU	Ribonuclease J 2 OS=Bacillus subtilis (strain 168) GN=rnjB PE=1 SV=3	1832	61251	59.96	AGAQVIFAQK
37	1::sw|O31760|RNJ2_BACSU	Ribonuclease J 2 OS=Bacillus subtilis (strain 168) GN=rnjB PE=1 SV=3	1832	61251	68.26	AGAQVIFAQK
37	1::sw|O31760|RNJ2_BACSU	Ribonuclease J 2 OS=Bacillus subtilis (strain 168) GN=rnjB PE=1 SV=3	1832	61251	19.67	AGAQVIFAQK
37	1::sw|O31760|RNJ2_BACSU	Ribonuclease J 2 OS=Bacillus subtilis (strain 168) GN=rnjB PE=1 SV=3	1832	61251	48.84	AGAQVIFAQK
37	1::sw|O31760|RNJ2_BACSU	Ribonuclease J 2 OS=Bacillus subtilis (strain 168) GN=rnjB PE=1 SV=3	1832	61251	21.65	AGAQVIFAQK
37	1::sw|O31760|RNJ2_BACSU	Ribonuclease J 2 OS=Bacillus subtilis (strain 168) GN=rnjB PE=1 SV=3	1832	61251	26.16	IAEETGMKR	Oxidation (M)
37	1::sw|O31760|RNJ2_BACSU	Ribonuclease J 2 OS=Bacillus subtilis (strain 168) GN=rnjB PE=1 SV=3	1832	61251	27.56	LMINLLKPK
37	1::sw|O31760|RNJ2_BACSU	Ribonuclease J 2 OS=Bacillus subtilis (strain 168) GN=rnjB PE=1 SV=3	1832	61251	59.44	LMINLLKPK
37	1::sw|O31760|RNJ2_BACSU	Ribonuclease J 2 OS=Bacillus subtilis (strain 168) GN=rnjB PE=1 SV=3	1832	61251	37.94	RSDIFLIEK
37	1::sw|O31760|RNJ2_BACSU	Ribonuclease J 2 OS=Bacillus subtilis (strain 168) GN=rnjB PE=1 SV=3	1832	61251	71.29	IIALGGVGEIGK
37	1::sw|O31760|RNJ2_BACSU	Ribonuclease J 2 OS=Bacillus subtilis (strain 168) GN=rnjB PE=1 SV=3	1832	61251	70.76	IIALGGVGEIGK
37	1::sw|O31760|RNJ2_BACSU	Ribonuclease J 2 OS=Bacillus subtilis (strain 168) GN=rnjB PE=1 SV=3	1832	61251	100.23	IIALGGVGEIGK
37	1::sw|O31760|RNJ2_BACSU	Ribonuclease J 2 OS=Bacillus subtilis (strain 168) GN=rnjB PE=1 SV=3	1832	61251	67.48	NLQSVLQLAR
37	1::sw|O31760|RNJ2_BACSU	Ribonuclease J 2 OS=Bacillus subtilis (strain 168) GN=rnjB PE=1 SV=3	1832	61251	70.94	NLQSVLQLAR
37	1::sw|O31760|RNJ2_BACSU	Ribonuclease J 2 OS=Bacillus subtilis (strain 168) GN=rnjB PE=1 SV=3	1832	61251	21.78	NLQSVLQLAR
37	1::sw|O31760|RNJ2_BACSU	Ribonuclease J 2 OS=Bacillus subtilis (strain 168) GN=rnjB PE=1 SV=3	1832	61251	21.45	HLVSGPEIITR
37	1::sw|O31760|RNJ2_BACSU	Ribonuclease J 2 OS=Bacillus subtilis (strain 168) GN=rnjB PE=1 SV=3	1832	61251	20.89	HLVSGPEIITR
37	1::sw|O31760|RNJ2_BACSU	Ribonuclease J 2 OS=Bacillus subtilis (strain 168) GN=rnjB PE=1 SV=3	1832	61251	53.93	HLVSGPEIITR
37	1::sw|O31760|RNJ2_BACSU	Ribonuclease J 2 OS=Bacillus subtilis (strain 168) GN=rnjB PE=1 SV=3	1832	61251	48.93	HLVSGPEIITR
37	1::sw|O31760|RNJ2_BACSU	Ribonuclease J 2 OS=Bacillus subtilis (strain 168) GN=rnjB PE=1 SV=3	1832	61251	48.14	HLVSGPEIITR
37	1::sw|O31760|RNJ2_BACSU	Ribonuclease J 2 OS=Bacillus subtilis (strain 168) GN=rnjB PE=1 SV=3	1832	61251	65.41	DALNQFLYEK
37	1::sw|O31760|RNJ2_BACSU	Ribonuclease J 2 OS=Bacillus subtilis (strain 168) GN=rnjB PE=1 SV=3	1832	61251	59.65	DALNQFLYEK
37	1::sw|O31760|RNJ2_BACSU	Ribonuclease J 2 OS=Bacillus subtilis (strain 168) GN=rnjB PE=1 SV=3	1832	61251	22.68	DALNQFLYEK
37	1::sw|O31760|RNJ2_BACSU	Ribonuclease J 2 OS=Bacillus subtilis (strain 168) GN=rnjB PE=1 SV=3	1832	61251	73.34	VIIAVFASNINR
37	1::sw|O31760|RNJ2_BACSU	Ribonuclease J 2 OS=Bacillus subtilis (strain 168) GN=rnjB PE=1 SV=3	1832	61251	83.02	VIIAVFASNINR
37	1::sw|O31760|RNJ2_BACSU	Ribonuclease J 2 OS=Bacillus subtilis (strain 168) GN=rnjB PE=1 SV=3	1832	61251	66.41	VIIAVFASNINR
37	1::sw|O31760|RNJ2_BACSU	Ribonuclease J 2 OS=Bacillus subtilis (strain 168) GN=rnjB PE=1 SV=3	1832	61251	69.78	VIIAVFASNINR
37	1::sw|O31760|RNJ2_BACSU	Ribonuclease J 2 OS=Bacillus subtilis (strain 168) GN=rnjB PE=1 SV=3	1832	61251	82.14	VIIAVFASNINR
37	1::sw|O31760|RNJ2_BACSU	Ribonuclease J 2 OS=Bacillus subtilis (strain 168) GN=rnjB PE=1 SV=3	1832	61251	40.84	TSLGSIVCTGDFK
37	1::sw|O31760|RNJ2_BACSU	Ribonuclease J 2 OS=Bacillus subtilis (strain 168) GN=rnjB PE=1 SV=3	1832	61251	57.76	TSLGSIVCTGDFK
37	1::sw|O31760|RNJ2_BACSU	Ribonuclease J 2 OS=Bacillus subtilis (strain 168) GN=rnjB PE=1 SV=3	1832	61251	87.68	TSLGSIVCTGDFK
37	1::sw|O31760|RNJ2_BACSU	Ribonuclease J 2 OS=Bacillus subtilis (strain 168) GN=rnjB PE=1 SV=3	1832	61251	79.45	IQQVIHAAAQNGR
37	1::sw|O31760|RNJ2_BACSU	Ribonuclease J 2 OS=Bacillus subtilis (strain 168) GN=rnjB PE=1 SV=3	1832	61251	59.6	VHVSGHGSQEELK
37	1::sw|O31760|RNJ2_BACSU	Ribonuclease J 2 OS=Bacillus subtilis (strain 168) GN=rnjB PE=1 SV=3	1832	61251	22.8	VHVSGHGSQEELK
37	1::sw|O31760|RNJ2_BACSU	Ribonuclease J 2 OS=Bacillus subtilis (strain 168) GN=rnjB PE=1 SV=3	1832	61251	32.58	VHVSGHGSQEELK
37	1::sw|O31760|RNJ2_BACSU	Ribonuclease J 2 OS=Bacillus subtilis (strain 168) GN=rnjB PE=1 SV=3	1832	61251	22.43	VHVSGHGSQEELK
37	1::sw|O31760|RNJ2_BACSU	Ribonuclease J 2 OS=Bacillus subtilis (strain 168) GN=rnjB PE=1 SV=3	1832	61251	39.92	TIHSIPDSVGVSFK
37	1::sw|O31760|RNJ2_BACSU	Ribonuclease J 2 OS=Bacillus subtilis (strain 168) GN=rnjB PE=1 SV=3	1832	61251	30.71	TIHSIPDSVGVSFK
37	1::sw|O31760|RNJ2_BACSU	Ribonuclease J 2 OS=Bacillus subtilis (strain 168) GN=rnjB PE=1 SV=3	1832	61251	53.04	TIHSIPDSVGVSFK
37	1::sw|O31760|RNJ2_BACSU	Ribonuclease J 2 OS=Bacillus subtilis (strain 168) GN=rnjB PE=1 SV=3	1832	61251	28.47	TIHSIPDSVGVSFK
37	1::sw|O31760|RNJ2_BACSU	Ribonuclease J 2 OS=Bacillus subtilis (strain 168) GN=rnjB PE=1 SV=3	1832	61251	27.1	TIHSIPDSVGVSFK
37	1::sw|O31760|RNJ2_BACSU	Ribonuclease J 2 OS=Bacillus subtilis (strain 168) GN=rnjB PE=1 SV=3	1832	61251	31.82	ESEGLIVQATELVR
37	1::sw|O31760|RNJ2_BACSU	Ribonuclease J 2 OS=Bacillus subtilis (strain 168) GN=rnjB PE=1 SV=3	1832	61251	26.88	ESEGLIVQATELVR
37	1::sw|O31760|RNJ2_BACSU	Ribonuclease J 2 OS=Bacillus subtilis (strain 168) GN=rnjB PE=1 SV=3	1832	61251	61.4	ESEGLIVQATELVR
37	1::sw|O31760|RNJ2_BACSU	Ribonuclease J 2 OS=Bacillus subtilis (strain 168) GN=rnjB PE=1 SV=3	1832	61251	88.84	ESEGLIVQATELVR
37	1::sw|O31760|RNJ2_BACSU	Ribonuclease J 2 OS=Bacillus subtilis (strain 168) GN=rnjB PE=1 SV=3	1832	61251	62.2	ESEGLIVQATELVR
37	1::sw|O31760|RNJ2_BACSU	Ribonuclease J 2 OS=Bacillus subtilis (strain 168) GN=rnjB PE=1 SV=3	1832	61251	27.67	LLSQDGILIVVITLDK
37	1::sw|O31760|RNJ2_BACSU	Ribonuclease J 2 OS=Bacillus subtilis (strain 168) GN=rnjB PE=1 SV=3	1832	61251	72.11	IGNSGVLALLSDSANAER
37	1::sw|O31760|RNJ2_BACSU	Ribonuclease J 2 OS=Bacillus subtilis (strain 168) GN=rnjB PE=1 SV=3	1832	61251	87.57	EVAIITAGSQGEPLAALTR
37	1::sw|O31760|RNJ2_BACSU	Ribonuclease J 2 OS=Bacillus subtilis (strain 168) GN=rnjB PE=1 SV=3	1832	61251	52.46	SIVTEATETSNVEWSTLK
37	1::sw|O31760|RNJ2_BACSU	Ribonuclease J 2 OS=Bacillus subtilis (strain 168) GN=rnjB PE=1 SV=3	1832	61251	45.57	FDQTPALNQTCDIGEIAK
37	1::sw|O31760|RNJ2_BACSU	Ribonuclease J 2 OS=Bacillus subtilis (strain 168) GN=rnjB PE=1 SV=3	1832	61251	67.34	AIFLTHGHDENIGGVFYLLNK
37	1::sw|O31760|RNJ2_BACSU	Ribonuclease J 2 OS=Bacillus subtilis (strain 168) GN=rnjB PE=1 SV=3	1832	61251	62.38	AIFLTHGHDENIGGVFYLLNK
37	1::sw|O31760|RNJ2_BACSU	Ribonuclease J 2 OS=Bacillus subtilis (strain 168) GN=rnjB PE=1 SV=3	1832	61251	53.31	AIFLTHGHDENIGGVFYLLNK
644	1::sw|O31761|YMFC_BACSU	Uncharacterized HTH-type transcriptional regulator YmfC OS=Bacillus subtilis (strain 168) GN=ymfC PE=4 SV=1	53	27994	53.15	ILEEEHVIIR
31	1::sw|O31762|BBEX_BACSU	Bacillibactin exporter OS=Bacillus subtilis (strain 168) GN=ymfD PE=1 SV=2	2080	44045	30.57	YAIDGVAK
31	1::sw|O31762|BBEX_BACSU	Bacillibactin exporter OS=Bacillus subtilis (strain 168) GN=ymfD PE=1 SV=2	2080	44045	32.1	YAIDGVAK
31	1::sw|O31762|BBEX_BACSU	Bacillibactin exporter OS=Bacillus subtilis (strain 168) GN=ymfD PE=1 SV=2	2080	44045	86.66	VSAGLGDIETANTSGK
31	1::sw|O31762|BBEX_BACSU	Bacillibactin exporter OS=Bacillus subtilis (strain 168) GN=ymfD PE=1 SV=2	2080	44045	53.51	VSAGLGDIETANTSGK
31	1::sw|O31762|BBEX_BACSU	Bacillibactin exporter OS=Bacillus subtilis (strain 168) GN=ymfD PE=1 SV=2	2080	44045	53.86	VSAGLGDIETANTSGK
31	1::sw|O31762|BBEX_BACSU	Bacillibactin exporter OS=Bacillus subtilis (strain 168) GN=ymfD PE=1 SV=2	2080	44045	111.97	VSAGLGDIETANTSGK
31	1::sw|O31762|BBEX_BACSU	Bacillibactin exporter OS=Bacillus subtilis (strain 168) GN=ymfD PE=1 SV=2	2080	44045	96.25	VSAGLGDIETANTSGK
31	1::sw|O31762|BBEX_BACSU	Bacillibactin exporter OS=Bacillus subtilis (strain 168) GN=ymfD PE=1 SV=2	2080	44045	70.45	VSAGLGDIETANTSGK
31	1::sw|O31762|BBEX_BACSU	Bacillibactin exporter OS=Bacillus subtilis (strain 168) GN=ymfD PE=1 SV=2	2080	44045	94.06	VSAGLGDIETANTSGK
31	1::sw|O31762|BBEX_BACSU	Bacillibactin exporter OS=Bacillus subtilis (strain 168) GN=ymfD PE=1 SV=2	2080	44045	100.35	VSAGLGDIETANTSGK
31	1::sw|O31762|BBEX_BACSU	Bacillibactin exporter OS=Bacillus subtilis (strain 168) GN=ymfD PE=1 SV=2	2080	44045	96.55	VSAGLGDIETANTSGK
31	1::sw|O31762|BBEX_BACSU	Bacillibactin exporter OS=Bacillus subtilis (strain 168) GN=ymfD PE=1 SV=2	2080	44045	96.58	VSAGLGDIETANTSGK
31	1::sw|O31762|BBEX_BACSU	Bacillibactin exporter OS=Bacillus subtilis (strain 168) GN=ymfD PE=1 SV=2	2080	44045	93.89	VSAGLGDIETANTSGK
31	1::sw|O31762|BBEX_BACSU	Bacillibactin exporter OS=Bacillus subtilis (strain 168) GN=ymfD PE=1 SV=2	2080	44045	83.22	VSAGLGDIETANTSGK
31	1::sw|O31762|BBEX_BACSU	Bacillibactin exporter OS=Bacillus subtilis (strain 168) GN=ymfD PE=1 SV=2	2080	44045	71.99	VSAGLGDIETANTSGK
31	1::sw|O31762|BBEX_BACSU	Bacillibactin exporter OS=Bacillus subtilis (strain 168) GN=ymfD PE=1 SV=2	2080	44045	29.18	VSAGLGDIETANTSGK
31	1::sw|O31762|BBEX_BACSU	Bacillibactin exporter OS=Bacillus subtilis (strain 168) GN=ymfD PE=1 SV=2	2080	44045	111.99	VSAGLGDIETANTSGK
31	1::sw|O31762|BBEX_BACSU	Bacillibactin exporter OS=Bacillus subtilis (strain 168) GN=ymfD PE=1 SV=2	2080	44045	58.58	VSAGLGDIETANTSGK
31	1::sw|O31762|BBEX_BACSU	Bacillibactin exporter OS=Bacillus subtilis (strain 168) GN=ymfD PE=1 SV=2	2080	44045	90.63	VSAGLGDIETANTSGK
31	1::sw|O31762|BBEX_BACSU	Bacillibactin exporter OS=Bacillus subtilis (strain 168) GN=ymfD PE=1 SV=2	2080	44045	112.06	VSAGLGDIETANTSGK
31	1::sw|O31762|BBEX_BACSU	Bacillibactin exporter OS=Bacillus subtilis (strain 168) GN=ymfD PE=1 SV=2	2080	44045	107.37	VSAGLGDIETANTSGK
31	1::sw|O31762|BBEX_BACSU	Bacillibactin exporter OS=Bacillus subtilis (strain 168) GN=ymfD PE=1 SV=2	2080	44045	94.1	VSAGLGDIETANTSGK
31	1::sw|O31762|BBEX_BACSU	Bacillibactin exporter OS=Bacillus subtilis (strain 168) GN=ymfD PE=1 SV=2	2080	44045	111.89	VSAGLGDIETANTSGK
31	1::sw|O31762|BBEX_BACSU	Bacillibactin exporter OS=Bacillus subtilis (strain 168) GN=ymfD PE=1 SV=2	2080	44045	103.35	VSAGLGDIETANTSGK
31	1::sw|O31762|BBEX_BACSU	Bacillibactin exporter OS=Bacillus subtilis (strain 168) GN=ymfD PE=1 SV=2	2080	44045	107.15	VSAGLGDIETANTSGK
31	1::sw|O31762|BBEX_BACSU	Bacillibactin exporter OS=Bacillus subtilis (strain 168) GN=ymfD PE=1 SV=2	2080	44045	103.48	VSAGLGDIETANTSGK
31	1::sw|O31762|BBEX_BACSU	Bacillibactin exporter OS=Bacillus subtilis (strain 168) GN=ymfD PE=1 SV=2	2080	44045	21.81	VSAGLGDIETANTSGK
31	1::sw|O31762|BBEX_BACSU	Bacillibactin exporter OS=Bacillus subtilis (strain 168) GN=ymfD PE=1 SV=2	2080	44045	81.5	VSAGLGDIETANTSGK
31	1::sw|O31762|BBEX_BACSU	Bacillibactin exporter OS=Bacillus subtilis (strain 168) GN=ymfD PE=1 SV=2	2080	44045	99.29	VSAGLGDIETANTSGK
31	1::sw|O31762|BBEX_BACSU	Bacillibactin exporter OS=Bacillus subtilis (strain 168) GN=ymfD PE=1 SV=2	2080	44045	74.14	GGLLAIPLLFLSTSSFIAGK
31	1::sw|O31762|BBEX_BACSU	Bacillibactin exporter OS=Bacillus subtilis (strain 168) GN=ymfD PE=1 SV=2	2080	44045	58	GGLLAIPLLFLSTSSFIAGK
31	1::sw|O31762|BBEX_BACSU	Bacillibactin exporter OS=Bacillus subtilis (strain 168) GN=ymfD PE=1 SV=2	2080	44045	39.69	GGLLAIPLLFLSTSSFIAGK
31	1::sw|O31762|BBEX_BACSU	Bacillibactin exporter OS=Bacillus subtilis (strain 168) GN=ymfD PE=1 SV=2	2080	44045	66.72	GGLLAIPLLFLSTSSFIAGK
31	1::sw|O31762|BBEX_BACSU	Bacillibactin exporter OS=Bacillus subtilis (strain 168) GN=ymfD PE=1 SV=2	2080	44045	85.99	GGLLAIPLLFLSTSSFIAGK
31	1::sw|O31762|BBEX_BACSU	Bacillibactin exporter OS=Bacillus subtilis (strain 168) GN=ymfD PE=1 SV=2	2080	44045	82.06	GGLLAIPLLFLSTSSFIAGK
31	1::sw|O31762|BBEX_BACSU	Bacillibactin exporter OS=Bacillus subtilis (strain 168) GN=ymfD PE=1 SV=2	2080	44045	35.56	ILLPCLLIAGLGGAVAAFASTYMK
407	1::sw|O31764|YMFF_BACSU	Probable inactive metalloprotease YmfF OS=Bacillus subtilis (strain 168) GN=ymfF PE=3 SV=2	147	48231	37.11	IQAVYDDK
407	1::sw|O31764|YMFF_BACSU	Probable inactive metalloprotease YmfF OS=Bacillus subtilis (strain 168) GN=ymfF PE=3 SV=2	147	48231	65.15	ASLAYYAASR
407	1::sw|O31764|YMFF_BACSU	Probable inactive metalloprotease YmfF OS=Bacillus subtilis (strain 168) GN=ymfF PE=3 SV=2	147	48231	24.29	EVIDEEDVK
407	1::sw|O31764|YMFF_BACSU	Probable inactive metalloprotease YmfF OS=Bacillus subtilis (strain 168) GN=ymfF PE=3 SV=2	147	48231	19.76	RALLPHVLLR
407	1::sw|O31764|YMFF_BACSU	Probable inactive metalloprotease YmfF OS=Bacillus subtilis (strain 168) GN=ymfF PE=3 SV=2	147	48231	36.29	TLGMIENNHADEK
407	1::sw|O31764|YMFF_BACSU	Probable inactive metalloprotease YmfF OS=Bacillus subtilis (strain 168) GN=ymfF PE=3 SV=2	147	48231	69.48	SYLDELYGTSVSADLTK
347	1::sw|O31766|YMFH_BACSU	Uncharacterized zinc protease YmfH OS=Bacillus subtilis (strain 168) GN=ymfH PE=3 SV=2	194	49089	40.5	YGSIDNR
347	1::sw|O31766|YMFH_BACSU	Uncharacterized zinc protease YmfH OS=Bacillus subtilis (strain 168) GN=ymfH PE=3 SV=2	194	49089	39.93	SSAQYESLYEK
347	1::sw|O31766|YMFH_BACSU	Uncharacterized zinc protease YmfH OS=Bacillus subtilis (strain 168) GN=ymfH PE=3 SV=2	194	49089	57.35	QGASANAFTSFTR
347	1::sw|O31766|YMFH_BACSU	Uncharacterized zinc protease YmfH OS=Bacillus subtilis (strain 168) GN=ymfH PE=3 SV=2	194	49089	34.35	LYFGVIENMYK
347	1::sw|O31766|YMFH_BACSU	Uncharacterized zinc protease YmfH OS=Bacillus subtilis (strain 168) GN=ymfH PE=3 SV=2	194	49089	58.87	TAYLFSSTSNVER
347	1::sw|O31766|YMFH_BACSU	Uncharacterized zinc protease YmfH OS=Bacillus subtilis (strain 168) GN=ymfH PE=3 SV=2	194	49089	65.05	IDIAGTVESISHITK
122	1::sw|O31771|YMFM_BACSU	Uncharacterized membrane protein YmfM OS=Bacillus subtilis (strain 168) GN=ymfM PE=4 SV=3	656	32416	40.66	TGYAPNLK
122	1::sw|O31771|YMFM_BACSU	Uncharacterized membrane protein YmfM OS=Bacillus subtilis (strain 168) GN=ymfM PE=4 SV=3	656	32416	30.69	TGYAPNLK
122	1::sw|O31771|YMFM_BACSU	Uncharacterized membrane protein YmfM OS=Bacillus subtilis (strain 168) GN=ymfM PE=4 SV=3	656	32416	20.44	EMPKPASK
122	1::sw|O31771|YMFM_BACSU	Uncharacterized membrane protein YmfM OS=Bacillus subtilis (strain 168) GN=ymfM PE=4 SV=3	656	32416	20.1	EMPKPASK
122	1::sw|O31771|YMFM_BACSU	Uncharacterized membrane protein YmfM OS=Bacillus subtilis (strain 168) GN=ymfM PE=4 SV=3	656	32416	33.86	ISGMNLQK
122	1::sw|O31771|YMFM_BACSU	Uncharacterized membrane protein YmfM OS=Bacillus subtilis (strain 168) GN=ymfM PE=4 SV=3	656	32416	46.73	ISGMNLQK
122	1::sw|O31771|YMFM_BACSU	Uncharacterized membrane protein YmfM OS=Bacillus subtilis (strain 168) GN=ymfM PE=4 SV=3	656	32416	45.17	ISGMNLQK
122	1::sw|O31771|YMFM_BACSU	Uncharacterized membrane protein YmfM OS=Bacillus subtilis (strain 168) GN=ymfM PE=4 SV=3	656	32416	44.15	ISGMNLQK
122	1::sw|O31771|YMFM_BACSU	Uncharacterized membrane protein YmfM OS=Bacillus subtilis (strain 168) GN=ymfM PE=4 SV=3	656	32416	40.51	ISGMNLQK
122	1::sw|O31771|YMFM_BACSU	Uncharacterized membrane protein YmfM OS=Bacillus subtilis (strain 168) GN=ymfM PE=4 SV=3	656	32416	69.62	VLSYELDPK
122	1::sw|O31771|YMFM_BACSU	Uncharacterized membrane protein YmfM OS=Bacillus subtilis (strain 168) GN=ymfM PE=4 SV=3	656	32416	46.25	VLSYELDPK
122	1::sw|O31771|YMFM_BACSU	Uncharacterized membrane protein YmfM OS=Bacillus subtilis (strain 168) GN=ymfM PE=4 SV=3	656	32416	53.31	VRDENSSSLK
122	1::sw|O31771|YMFM_BACSU	Uncharacterized membrane protein YmfM OS=Bacillus subtilis (strain 168) GN=ymfM PE=4 SV=3	656	32416	47.97	VRDENSSSLK
122	1::sw|O31771|YMFM_BACSU	Uncharacterized membrane protein YmfM OS=Bacillus subtilis (strain 168) GN=ymfM PE=4 SV=3	656	32416	33.51	VRDENSSSLK
122	1::sw|O31771|YMFM_BACSU	Uncharacterized membrane protein YmfM OS=Bacillus subtilis (strain 168) GN=ymfM PE=4 SV=3	656	32416	35.31	VRDENSSSLK
122	1::sw|O31771|YMFM_BACSU	Uncharacterized membrane protein YmfM OS=Bacillus subtilis (strain 168) GN=ymfM PE=4 SV=3	656	32416	75.3	VRDENSSSLK
122	1::sw|O31771|YMFM_BACSU	Uncharacterized membrane protein YmfM OS=Bacillus subtilis (strain 168) GN=ymfM PE=4 SV=3	656	32416	25.01	ENDSEKLEIK
122	1::sw|O31771|YMFM_BACSU	Uncharacterized membrane protein YmfM OS=Bacillus subtilis (strain 168) GN=ymfM PE=4 SV=3	656	32416	35.35	ENDSEKLEIK
122	1::sw|O31771|YMFM_BACSU	Uncharacterized membrane protein YmfM OS=Bacillus subtilis (strain 168) GN=ymfM PE=4 SV=3	656	32416	54.52	DIPNTYHDDVSEK
122	1::sw|O31771|YMFM_BACSU	Uncharacterized membrane protein YmfM OS=Bacillus subtilis (strain 168) GN=ymfM PE=4 SV=3	656	32416	56.87	DIPNTYHDDVSEK
122	1::sw|O31771|YMFM_BACSU	Uncharacterized membrane protein YmfM OS=Bacillus subtilis (strain 168) GN=ymfM PE=4 SV=3	656	32416	37.89	DIPNTYHDDVSEK
122	1::sw|O31771|YMFM_BACSU	Uncharacterized membrane protein YmfM OS=Bacillus subtilis (strain 168) GN=ymfM PE=4 SV=3	656	32416	63.5	DIPNTYHDDVSEK
122	1::sw|O31771|YMFM_BACSU	Uncharacterized membrane protein YmfM OS=Bacillus subtilis (strain 168) GN=ymfM PE=4 SV=3	656	32416	51.06	DIPNTYHDDVSEK
122	1::sw|O31771|YMFM_BACSU	Uncharacterized membrane protein YmfM OS=Bacillus subtilis (strain 168) GN=ymfM PE=4 SV=3	656	32416	37.89	AAGTEGSLTTYEVSGADK
122	1::sw|O31771|YMFM_BACSU	Uncharacterized membrane protein YmfM OS=Bacillus subtilis (strain 168) GN=ymfM PE=4 SV=3	656	32416	52.58	AAGTEGSLTTYEVSGADK
122	1::sw|O31771|YMFM_BACSU	Uncharacterized membrane protein YmfM OS=Bacillus subtilis (strain 168) GN=ymfM PE=4 SV=3	656	32416	49.21	AAGTEGSLTTYEVSGADK
122	1::sw|O31771|YMFM_BACSU	Uncharacterized membrane protein YmfM OS=Bacillus subtilis (strain 168) GN=ymfM PE=4 SV=3	656	32416	53.5	YLTALEEGNYDIIPGK
122	1::sw|O31771|YMFM_BACSU	Uncharacterized membrane protein YmfM OS=Bacillus subtilis (strain 168) GN=ymfM PE=4 SV=3	656	32416	38.04	YLTALEEGNYDIIPGK
122	1::sw|O31771|YMFM_BACSU	Uncharacterized membrane protein YmfM OS=Bacillus subtilis (strain 168) GN=ymfM PE=4 SV=3	656	32416	32.24	YLTALEEGNYDIIPGK
122	1::sw|O31771|YMFM_BACSU	Uncharacterized membrane protein YmfM OS=Bacillus subtilis (strain 168) GN=ymfM PE=4 SV=3	656	32416	43.62	QYAEAVGLDADQLFEEHKK
122	1::sw|O31771|YMFM_BACSU	Uncharacterized membrane protein YmfM OS=Bacillus subtilis (strain 168) GN=ymfM PE=4 SV=3	656	32416	32.85	QYAEAVGLDADQLFEEHKK
380	1::sw|O31773|PBPX_BACSU	Putative penicillin-binding protein PbpX OS=Bacillus subtilis (strain 168) GN=pbpX PE=2 SV=1	165	43887	43.76	DIELQGIK
380	1::sw|O31773|PBPX_BACSU	Putative penicillin-binding protein PbpX OS=Bacillus subtilis (strain 168) GN=pbpX PE=2 SV=1	165	43887	69.06	FDQALIDGK
380	1::sw|O31773|PBPX_BACSU	Putative penicillin-binding protein PbpX OS=Bacillus subtilis (strain 168) GN=pbpX PE=2 SV=1	165	43887	46.56	EIGFSGTAMIVR
380	1::sw|O31773|PBPX_BACSU	Putative penicillin-binding protein PbpX OS=Bacillus subtilis (strain 168) GN=pbpX PE=2 SV=1	165	43887	46.02	ALIATAILQLEEK
380	1::sw|O31773|PBPX_BACSU	Putative penicillin-binding protein PbpX OS=Bacillus subtilis (strain 168) GN=pbpX PE=2 SV=1	165	43887	30.71	ALIATAILQLEEK
380	1::sw|O31773|PBPX_BACSU	Putative penicillin-binding protein PbpX OS=Bacillus subtilis (strain 168) GN=pbpX PE=2 SV=1	165	43887	34.23	SGQTIVILFSNIQNNAK
58	1::sw|O31774|RNY_BACSU	Ribonuclease Y OS=Bacillus subtilis (strain 168) GN=rny PE=1 SV=1	1344	58940	34.96	KHEGIDK
58	1::sw|O31774|RNY_BACSU	Ribonuclease Y OS=Bacillus subtilis (strain 168) GN=rny PE=1 SV=1	1344	58940	24.02	KHEGIDK
58	1::sw|O31774|RNY_BACSU	Ribonuclease Y OS=Bacillus subtilis (strain 168) GN=rny PE=1 SV=1	1344	58940	40.75	SFAIQAGR
58	1::sw|O31774|RNY_BACSU	Ribonuclease Y OS=Bacillus subtilis (strain 168) GN=rny PE=1 SV=1	1344	58940	32.87	SFAIQAGR
58	1::sw|O31774|RNY_BACSU	Ribonuclease Y OS=Bacillus subtilis (strain 168) GN=rny PE=1 SV=1	1344	58940	38.56	SFAIQAGR
58	1::sw|O31774|RNY_BACSU	Ribonuclease Y OS=Bacillus subtilis (strain 168) GN=rny PE=1 SV=1	1344	58940	28.28	HEGIDKR
58	1::sw|O31774|RNY_BACSU	Ribonuclease Y OS=Bacillus subtilis (strain 168) GN=rny PE=1 SV=1	1344	58940	21.07	DHSLNER
58	1::sw|O31774|RNY_BACSU	Ribonuclease Y OS=Bacillus subtilis (strain 168) GN=rny PE=1 SV=1	1344	58940	37.43	DHSLNER
58	1::sw|O31774|RNY_BACSU	Ribonuclease Y OS=Bacillus subtilis (strain 168) GN=rny PE=1 SV=1	1344	58940	22.86	DHSLNER
58	1::sw|O31774|RNY_BACSU	Ribonuclease Y OS=Bacillus subtilis (strain 168) GN=rny PE=1 SV=1	1344	58940	30.37	DHSLNER
58	1::sw|O31774|RNY_BACSU	Ribonuclease Y OS=Bacillus subtilis (strain 168) GN=rny PE=1 SV=1	1344	58940	24.66	DHSLNER
58	1::sw|O31774|RNY_BACSU	Ribonuclease Y OS=Bacillus subtilis (strain 168) GN=rny PE=1 SV=1	1344	58940	19.78	IEEMVEK
58	1::sw|O31774|RNY_BACSU	Ribonuclease Y OS=Bacillus subtilis (strain 168) GN=rny PE=1 SV=1	1344	58940	29.09	KEALLEAK
58	1::sw|O31774|RNY_BACSU	Ribonuclease Y OS=Bacillus subtilis (strain 168) GN=rny PE=1 SV=1	1344	58940	25.46	KEALLEAK
58	1::sw|O31774|RNY_BACSU	Ribonuclease Y OS=Bacillus subtilis (strain 168) GN=rny PE=1 SV=1	1344	58940	42.74	AGLLHDIGK
58	1::sw|O31774|RNY_BACSU	Ribonuclease Y OS=Bacillus subtilis (strain 168) GN=rny PE=1 SV=1	1344	58940	34.87	AGLLHDIGK
58	1::sw|O31774|RNY_BACSU	Ribonuclease Y OS=Bacillus subtilis (strain 168) GN=rny PE=1 SV=1	1344	58940	68.73	IDAEQEVR
58	1::sw|O31774|RNY_BACSU	Ribonuclease Y OS=Bacillus subtilis (strain 168) GN=rny PE=1 SV=1	1344	58940	22.87	IDAEQEVR
58	1::sw|O31774|RNY_BACSU	Ribonuclease Y OS=Bacillus subtilis (strain 168) GN=rny PE=1 SV=1	1344	58940	57.73	IDAEQEVR
58	1::sw|O31774|RNY_BACSU	Ribonuclease Y OS=Bacillus subtilis (strain 168) GN=rny PE=1 SV=1	1344	58940	55.43	IDAEQEVR
58	1::sw|O31774|RNY_BACSU	Ribonuclease Y OS=Bacillus subtilis (strain 168) GN=rny PE=1 SV=1	1344	58940	41.79	KDHSLNER
58	1::sw|O31774|RNY_BACSU	Ribonuclease Y OS=Bacillus subtilis (strain 168) GN=rny PE=1 SV=1	1344	58940	64.73	KDHSLNER
58	1::sw|O31774|RNY_BACSU	Ribonuclease Y OS=Bacillus subtilis (strain 168) GN=rny PE=1 SV=1	1344	58940	25.88	KDHSLNER
58	1::sw|O31774|RNY_BACSU	Ribonuclease Y OS=Bacillus subtilis (strain 168) GN=rny PE=1 SV=1	1344	58940	46.02	KDHSLNER
58	1::sw|O31774|RNY_BACSU	Ribonuclease Y OS=Bacillus subtilis (strain 168) GN=rny PE=1 SV=1	1344	58940	34.21	KDHSLNER
58	1::sw|O31774|RNY_BACSU	Ribonuclease Y OS=Bacillus subtilis (strain 168) GN=rny PE=1 SV=1	1344	58940	38.76	TSYGQNVLK
58	1::sw|O31774|RNY_BACSU	Ribonuclease Y OS=Bacillus subtilis (strain 168) GN=rny PE=1 SV=1	1344	58940	38.61	TSYGQNVLK
58	1::sw|O31774|RNY_BACSU	Ribonuclease Y OS=Bacillus subtilis (strain 168) GN=rny PE=1 SV=1	1344	58940	32.88	TSYGQNVLK
58	1::sw|O31774|RNY_BACSU	Ribonuclease Y OS=Bacillus subtilis (strain 168) GN=rny PE=1 SV=1	1344	58940	62.18	TSYGQNVLK
58	1::sw|O31774|RNY_BACSU	Ribonuclease Y OS=Bacillus subtilis (strain 168) GN=rny PE=1 SV=1	1344	58940	26.01	MQQSELER
58	1::sw|O31774|RNY_BACSU	Ribonuclease Y OS=Bacillus subtilis (strain 168) GN=rny PE=1 SV=1	1344	58940	53.89	NILSLALQR
58	1::sw|O31774|RNY_BACSU	Ribonuclease Y OS=Bacillus subtilis (strain 168) GN=rny PE=1 SV=1	1344	58940	68.15	NILSLALQR
58	1::sw|O31774|RNY_BACSU	Ribonuclease Y OS=Bacillus subtilis (strain 168) GN=rny PE=1 SV=1	1344	58940	25.39	REVDDYIR
58	1::sw|O31774|RNY_BACSU	Ribonuclease Y OS=Bacillus subtilis (strain 168) GN=rny PE=1 SV=1	1344	58940	24.31	SETLENYIR
58	1::sw|O31774|RNY_BACSU	Ribonuclease Y OS=Bacillus subtilis (strain 168) GN=rny PE=1 SV=1	1344	58940	28.74	SETLENYIR
58	1::sw|O31774|RNY_BACSU	Ribonuclease Y OS=Bacillus subtilis (strain 168) GN=rny PE=1 SV=1	1344	58940	70.81	GAAEQILEDAK
58	1::sw|O31774|RNY_BACSU	Ribonuclease Y OS=Bacillus subtilis (strain 168) GN=rny PE=1 SV=1	1344	58940	75.61	GAAEQILEDAK
58	1::sw|O31774|RNY_BACSU	Ribonuclease Y OS=Bacillus subtilis (strain 168) GN=rny PE=1 SV=1	1344	58940	67.89	GAAEQILEDAK
58	1::sw|O31774|RNY_BACSU	Ribonuclease Y OS=Bacillus subtilis (strain 168) GN=rny PE=1 SV=1	1344	58940	46.82	LLQKEENLDR
58	1::sw|O31774|RNY_BACSU	Ribonuclease Y OS=Bacillus subtilis (strain 168) GN=rny PE=1 SV=1	1344	58940	22.32	QQHIEEMESK
58	1::sw|O31774|RNY_BACSU	Ribonuclease Y OS=Bacillus subtilis (strain 168) GN=rny PE=1 SV=1	1344	58940	19.73	QQHIEEMESK
58	1::sw|O31774|RNY_BACSU	Ribonuclease Y OS=Bacillus subtilis (strain 168) GN=rny PE=1 SV=1	1344	58940	63.08	GAAEQILEDAKR
58	1::sw|O31774|RNY_BACSU	Ribonuclease Y OS=Bacillus subtilis (strain 168) GN=rny PE=1 SV=1	1344	58940	48.32	GAAEQILEDAKR
58	1::sw|O31774|RNY_BACSU	Ribonuclease Y OS=Bacillus subtilis (strain 168) GN=rny PE=1 SV=1	1344	58940	34.96	GAAEQILEDAKR
58	1::sw|O31774|RNY_BACSU	Ribonuclease Y OS=Bacillus subtilis (strain 168) GN=rny PE=1 SV=1	1344	58940	20.89	GAAEQILEDAKR
58	1::sw|O31774|RNY_BACSU	Ribonuclease Y OS=Bacillus subtilis (strain 168) GN=rny PE=1 SV=1	1344	58940	41.16	IEDELDYPGHIK
58	1::sw|O31774|RNY_BACSU	Ribonuclease Y OS=Bacillus subtilis (strain 168) GN=rny PE=1 SV=1	1344	58940	49.47	IEDELDYPGHIK
58	1::sw|O31774|RNY_BACSU	Ribonuclease Y OS=Bacillus subtilis (strain 168) GN=rny PE=1 SV=1	1344	58940	29.02	IEDELDYPGHIK
58	1::sw|O31774|RNY_BACSU	Ribonuclease Y OS=Bacillus subtilis (strain 168) GN=rny PE=1 SV=1	1344	58940	30.19	IEDELDYPGHIK
58	1::sw|O31774|RNY_BACSU	Ribonuclease Y OS=Bacillus subtilis (strain 168) GN=rny PE=1 SV=1	1344	58940	69.11	LEEISESYEGVEK
58	1::sw|O31774|RNY_BACSU	Ribonuclease Y OS=Bacillus subtilis (strain 168) GN=rny PE=1 SV=1	1344	58940	68.98	LEEISESYEGVEK
58	1::sw|O31774|RNY_BACSU	Ribonuclease Y OS=Bacillus subtilis (strain 168) GN=rny PE=1 SV=1	1344	58940	61.6	LEEISESYEGVEK
58	1::sw|O31774|RNY_BACSU	Ribonuclease Y OS=Bacillus subtilis (strain 168) GN=rny PE=1 SV=1	1344	58940	69.17	LEEISESYEGVEK
58	1::sw|O31774|RNY_BACSU	Ribonuclease Y OS=Bacillus subtilis (strain 168) GN=rny PE=1 SV=1	1344	58940	66.83	LEEISESYEGVEK
58	1::sw|O31774|RNY_BACSU	Ribonuclease Y OS=Bacillus subtilis (strain 168) GN=rny PE=1 SV=1	1344	58940	69.1	LEEISESYEGVEK
58	1::sw|O31774|RNY_BACSU	Ribonuclease Y OS=Bacillus subtilis (strain 168) GN=rny PE=1 SV=1	1344	58940	62.63	LEEISESYEGVEK
58	1::sw|O31774|RNY_BACSU	Ribonuclease Y OS=Bacillus subtilis (strain 168) GN=rny PE=1 SV=1	1344	58940	25.85	RIEDELDYPGHIK
58	1::sw|O31774|RNY_BACSU	Ribonuclease Y OS=Bacillus subtilis (strain 168) GN=rny PE=1 SV=1	1344	58940	32.37	RIEDELDYPGHIK
58	1::sw|O31774|RNY_BACSU	Ribonuclease Y OS=Bacillus subtilis (strain 168) GN=rny PE=1 SV=1	1344	58940	54.19	VENELSHDIAIMTK
58	1::sw|O31774|RNY_BACSU	Ribonuclease Y OS=Bacillus subtilis (strain 168) GN=rny PE=1 SV=1	1344	58940	35.59	VENELSHDIAIMTK
58	1::sw|O31774|RNY_BACSU	Ribonuclease Y OS=Bacillus subtilis (strain 168) GN=rny PE=1 SV=1	1344	58940	34.78	VENELSHDIAIMTK
58	1::sw|O31774|RNY_BACSU	Ribonuclease Y OS=Bacillus subtilis (strain 168) GN=rny PE=1 SV=1	1344	58940	72.65	IMVKPDSINDLEAHR
58	1::sw|O31774|RNY_BACSU	Ribonuclease Y OS=Bacillus subtilis (strain 168) GN=rny PE=1 SV=1	1344	58940	59.11	IMVKPDSINDLEAHR
58	1::sw|O31774|RNY_BACSU	Ribonuclease Y OS=Bacillus subtilis (strain 168) GN=rny PE=1 SV=1	1344	58940	40.94	EMGEQTTFEVGVHGLHPDLIK
58	1::sw|O31774|RNY_BACSU	Ribonuclease Y OS=Bacillus subtilis (strain 168) GN=rny PE=1 SV=1	1344	58940	29.45	CAADHVAETTVSVVNLPNDEMK
820	1::sw|O31776|TDH_BACSU	L-threonine 3-dehydrogenase OS=Bacillus subtilis (strain 168) GN=tdh PE=3 SV=1	25	37543	24.75	AAGASQVIAIDKNEYR
341	1::sw|O31777|BIOF1_BACSU	8-amino-7-oxononanoate synthase 1 OS=Bacillus subtilis (strain 168) GN=kbl PE=3 SV=1	197	43313	42.16	VLIDYLR
341	1::sw|O31777|BIOF1_BACSU	8-amino-7-oxononanoate synthase 1 OS=Bacillus subtilis (strain 168) GN=kbl PE=3 SV=1	197	43313	24.87	TIITAEHTK
341	1::sw|O31777|BIOF1_BACSU	8-amino-7-oxononanoate synthase 1 OS=Bacillus subtilis (strain 168) GN=kbl PE=3 SV=1	197	43313	29.48	VHIQVGTLSK
341	1::sw|O31777|BIOF1_BACSU	8-amino-7-oxononanoate synthase 1 OS=Bacillus subtilis (strain 168) GN=kbl PE=3 SV=1	197	43313	55.1	AIGVLGGYAAGSK
341	1::sw|O31777|BIOF1_BACSU	8-amino-7-oxononanoate synthase 1 OS=Bacillus subtilis (strain 168) GN=kbl PE=3 SV=1	197	43313	19.45	ENHTWQDIK
341	1::sw|O31777|BIOF1_BACSU	8-amino-7-oxononanoate synthase 1 OS=Bacillus subtilis (strain 168) GN=kbl PE=3 SV=1	197	43313	18.84	GTVNHFGLDGR
341	1::sw|O31777|BIOF1_BACSU	8-amino-7-oxononanoate synthase 1 OS=Bacillus subtilis (strain 168) GN=kbl PE=3 SV=1	197	43313	64.91	GVFAQSIVFPTVAK
341	1::sw|O31777|BIOF1_BACSU	8-amino-7-oxononanoate synthase 1 OS=Bacillus subtilis (strain 168) GN=kbl PE=3 SV=1	197	43313	24.31	VYQHVNMSDLER
341	1::sw|O31777|BIOF1_BACSU	8-amino-7-oxononanoate synthase 1 OS=Bacillus subtilis (strain 168) GN=kbl PE=3 SV=1	197	43313	27.1	VYQHVNMSDLER
341	1::sw|O31777|BIOF1_BACSU	8-amino-7-oxononanoate synthase 1 OS=Bacillus subtilis (strain 168) GN=kbl PE=3 SV=1	197	43313	42.7	SETPILPILIGDEGVAK
341	1::sw|O31777|BIOF1_BACSU	8-amino-7-oxononanoate synthase 1 OS=Bacillus subtilis (strain 168) GN=kbl PE=3 SV=1	197	43313	47.24	TIITAEHTKDELDQALDVIEK
821	1::sw|O31778|MIAB_BACSU	(Dimethylallyl)adenosine tRNA methylthiotransferase MiaB OS=Bacillus subtilis (strain 168) GN=miaB PE=1 SV=1	25	58532	24.55	LPELLSEAYLSK
785	1::sw|O31795|MIAA_BACSU	tRNA dimethylallyltransferase OS=Bacillus subtilis (strain 168) GN=miaA PE=3 SV=2	29	35667	28.87	ALEILHTSGK
710	1::sw|O31796|HFQ_BACSU	RNA-binding protein Hfq OS=Bacillus subtilis (strain 168) GN=hfq PE=1 SV=1	42	8509	41.57	GFDNFTVLLESEGK
682	1::sw|O31797|YMZC_BACSU	Uncharacterized protein YmzC OS=Bacillus subtilis (strain 168) GN=ymzC PE=1 SV=1	47	10559	46.68	IYEYNESR
621	1::sw|O31810|YNDF_BACSU	Spore germination protein YndF OS=Bacillus subtilis (strain 168) GN=yndF PE=3 SV=1	58	45024	19.5	KIVGQVLK
621	1::sw|O31810|YNDF_BACSU	Spore germination protein YndF OS=Bacillus subtilis (strain 168) GN=yndF PE=3 SV=1	58	45024	58.42	SQQTLAYDINK
246	1::sw|O31816|YNDM_BACSU	Uncharacterized membrane protein YndM OS=Bacillus subtilis (strain 168) GN=yndM PE=4 SV=1	302	20496	52.48	HIIALASK
246	1::sw|O31816|YNDM_BACSU	Uncharacterized membrane protein YndM OS=Bacillus subtilis (strain 168) GN=yndM PE=4 SV=1	302	20496	53.75	HIIALASK
246	1::sw|O31816|YNDM_BACSU	Uncharacterized membrane protein YndM OS=Bacillus subtilis (strain 168) GN=yndM PE=4 SV=1	302	20496	23.34	HIIALASK
246	1::sw|O31816|YNDM_BACSU	Uncharacterized membrane protein YndM OS=Bacillus subtilis (strain 168) GN=yndM PE=4 SV=1	302	20496	41.03	HIIALASK
246	1::sw|O31816|YNDM_BACSU	Uncharacterized membrane protein YndM OS=Bacillus subtilis (strain 168) GN=yndM PE=4 SV=1	302	20496	39.52	HIIALASK
246	1::sw|O31816|YNDM_BACSU	Uncharacterized membrane protein YndM OS=Bacillus subtilis (strain 168) GN=yndM PE=4 SV=1	302	20496	42.28	HIIALASK
246	1::sw|O31816|YNDM_BACSU	Uncharacterized membrane protein YndM OS=Bacillus subtilis (strain 168) GN=yndM PE=4 SV=1	302	20496	39.92	NVLDENFR
246	1::sw|O31816|YNDM_BACSU	Uncharacterized membrane protein YndM OS=Bacillus subtilis (strain 168) GN=yndM PE=4 SV=1	302	20496	31.61	NVLDENFR
246	1::sw|O31816|YNDM_BACSU	Uncharacterized membrane protein YndM OS=Bacillus subtilis (strain 168) GN=yndM PE=4 SV=1	302	20496	19.04	NVLDENFR
246	1::sw|O31816|YNDM_BACSU	Uncharacterized membrane protein YndM OS=Bacillus subtilis (strain 168) GN=yndM PE=4 SV=1	302	20496	31.5	NVLDENFR
246	1::sw|O31816|YNDM_BACSU	Uncharacterized membrane protein YndM OS=Bacillus subtilis (strain 168) GN=yndM PE=4 SV=1	302	20496	26.48	NVLDENFR
246	1::sw|O31816|YNDM_BACSU	Uncharacterized membrane protein YndM OS=Bacillus subtilis (strain 168) GN=yndM PE=4 SV=1	302	20496	38.69	NVLDENFR
246	1::sw|O31816|YNDM_BACSU	Uncharacterized membrane protein YndM OS=Bacillus subtilis (strain 168) GN=yndM PE=4 SV=1	302	20496	25.16	NVLDENFR
246	1::sw|O31816|YNDM_BACSU	Uncharacterized membrane protein YndM OS=Bacillus subtilis (strain 168) GN=yndM PE=4 SV=1	302	20496	42.34	NVLDENFR
246	1::sw|O31816|YNDM_BACSU	Uncharacterized membrane protein YndM OS=Bacillus subtilis (strain 168) GN=yndM PE=4 SV=1	302	20496	35.41	NVLDENFR
246	1::sw|O31816|YNDM_BACSU	Uncharacterized membrane protein YndM OS=Bacillus subtilis (strain 168) GN=yndM PE=4 SV=1	302	20496	30.66	NVLDENFR
246	1::sw|O31816|YNDM_BACSU	Uncharacterized membrane protein YndM OS=Bacillus subtilis (strain 168) GN=yndM PE=4 SV=1	302	20496	68.33	DNTLQYQTEAADELFPETK
246	1::sw|O31816|YNDM_BACSU	Uncharacterized membrane protein YndM OS=Bacillus subtilis (strain 168) GN=yndM PE=4 SV=1	302	20496	61.25	DNTLQYQTEAADELFPETK
645	1::sw|O31823|YNGC_BACSU	Uncharacterized membrane protein YngC OS=Bacillus subtilis (strain 168) GN=yngC PE=3 SV=1	53	21912	29.76	HAISIPAGIAR
645	1::sw|O31823|YNGC_BACSU	Uncharacterized membrane protein YngC OS=Bacillus subtilis (strain 168) GN=yngC PE=3 SV=1	53	21912	40.43	HAISIPAGIAR
506	1::sw|O31824|NRNB_BACSU	Oligoribonuclease NrnB OS=Bacillus subtilis (strain 168) GN=nrnB PE=1 SV=1	94	46588	27.88	QYDTWEWER
506	1::sw|O31824|NRNB_BACSU	Oligoribonuclease NrnB OS=Bacillus subtilis (strain 168) GN=nrnB PE=1 SV=1	94	46588	47.59	DEVFVAFLAENLK
506	1::sw|O31824|NRNB_BACSU	Oligoribonuclease NrnB OS=Bacillus subtilis (strain 168) GN=nrnB PE=1 SV=1	94	46588	58.79	TIHDYIDVSEIAGR
570	1::sw|O31829|YOAF_BACSU	Uncharacterized protein YoaF OS=Bacillus subtilis (strain 168) GN=yoaF PE=4 SV=1	70	11097	32.84	DWTFTLVEK
570	1::sw|O31829|YOAF_BACSU	Uncharacterized protein YoaF OS=Bacillus subtilis (strain 168) GN=yoaF PE=4 SV=1	70	11097	42.5	GNEQNDIFLIK
570	1::sw|O31829|YOAF_BACSU	Uncharacterized protein YoaF OS=Bacillus subtilis (strain 168) GN=yoaF PE=4 SV=1	70	11097	42.22	GNEQNDIFLIK
778	1::sw|O31845|YOZB_BACSU	Uncharacterized membrane protein YozB OS=Bacillus subtilis (strain 168) GN=yozB PE=4 SV=1	30	20598	29.99	GFSMQVER
665	1::sw|O31854|YOJJ_BACSU	Uncharacterized protein YojJ OS=Bacillus subtilis (strain 168) GN=yojJ PE=4 SV=3	50	23027	30.2	YEQISENAFK
665	1::sw|O31854|YOJJ_BACSU	Uncharacterized protein YojJ OS=Bacillus subtilis (strain 168) GN=yojJ PE=4 SV=3	50	23027	19.82	YEQISENAFK
665	1::sw|O31854|YOJJ_BACSU	Uncharacterized protein YojJ OS=Bacillus subtilis (strain 168) GN=yojJ PE=4 SV=3	50	23027	37.62	LVSAANVLPLTTK
782	1::sw|O31916|YOQW_BACSU	Putative SOS response-associated peptidase YoqW OS=Bacillus subtilis (strain 168) GN=yoqW PE=3 SV=1	29	26104	29.44	NNSPELIESH
463	1::sw|O31929|YOPI_BACSU	SPBc2 prophage-derived uncharacterized protein YopI OS=Bacillus subtilis (strain 168) GN=yopI PE=4 SV=1	112	20596	63.07	LFNINLPSK
463	1::sw|O31929|YOPI_BACSU	SPBc2 prophage-derived uncharacterized protein YopI OS=Bacillus subtilis (strain 168) GN=yopI PE=4 SV=1	112	20596	18.29	DKLFNINLPSK
463	1::sw|O31929|YOPI_BACSU	SPBc2 prophage-derived uncharacterized protein YopI OS=Bacillus subtilis (strain 168) GN=yopI PE=4 SV=1	112	20596	73.3	NTNLIVSVTPDDK
583	1::sw|O31974|YOMK_BACSU	SPBc2 prophage-derived uncharacterized protein YomK OS=Bacillus subtilis (strain 168) GN=yomK PE=4 SV=1	66	16889	35.13	ELLIQIK
583	1::sw|O31974|YOMK_BACSU	SPBc2 prophage-derived uncharacterized protein YomK OS=Bacillus subtilis (strain 168) GN=yomK PE=4 SV=1	66	16889	54.13	SLSPSELSSAIAR
123	1::sw|O31989|YOLF_BACSU	SPBc2 prophage-derived uncharacterized protein YolF OS=Bacillus subtilis (strain 168) GN=yolF PE=4 SV=1	649	12304	22.37	IVIETTNK
123	1::sw|O31989|YOLF_BACSU	SPBc2 prophage-derived uncharacterized protein YolF OS=Bacillus subtilis (strain 168) GN=yolF PE=4 SV=1	649	12304	38.15	IVIETTNKR
123	1::sw|O31989|YOLF_BACSU	SPBc2 prophage-derived uncharacterized protein YolF OS=Bacillus subtilis (strain 168) GN=yolF PE=4 SV=1	649	12304	36.48	IGMPYAQPDR
123	1::sw|O31989|YOLF_BACSU	SPBc2 prophage-derived uncharacterized protein YolF OS=Bacillus subtilis (strain 168) GN=yolF PE=4 SV=1	649	12304	44.31	IGMPYAQPDR
123	1::sw|O31989|YOLF_BACSU	SPBc2 prophage-derived uncharacterized protein YolF OS=Bacillus subtilis (strain 168) GN=yolF PE=4 SV=1	649	12304	46.89	IGMPYAQPDR
123	1::sw|O31989|YOLF_BACSU	SPBc2 prophage-derived uncharacterized protein YolF OS=Bacillus subtilis (strain 168) GN=yolF PE=4 SV=1	649	12304	63.85	YGVADNIDYK
123	1::sw|O31989|YOLF_BACSU	SPBc2 prophage-derived uncharacterized protein YolF OS=Bacillus subtilis (strain 168) GN=yolF PE=4 SV=1	649	12304	56.19	YGVADNIDYK
123	1::sw|O31989|YOLF_BACSU	SPBc2 prophage-derived uncharacterized protein YolF OS=Bacillus subtilis (strain 168) GN=yolF PE=4 SV=1	649	12304	76.11	YGVADNIDYK
123	1::sw|O31989|YOLF_BACSU	SPBc2 prophage-derived uncharacterized protein YolF OS=Bacillus subtilis (strain 168) GN=yolF PE=4 SV=1	649	12304	66.46	YGVADNIDYK
123	1::sw|O31989|YOLF_BACSU	SPBc2 prophage-derived uncharacterized protein YolF OS=Bacillus subtilis (strain 168) GN=yolF PE=4 SV=1	649	12304	53.09	YGVADNIDYK
123	1::sw|O31989|YOLF_BACSU	SPBc2 prophage-derived uncharacterized protein YolF OS=Bacillus subtilis (strain 168) GN=yolF PE=4 SV=1	649	12304	70.25	YGVADNIDYK
123	1::sw|O31989|YOLF_BACSU	SPBc2 prophage-derived uncharacterized protein YolF OS=Bacillus subtilis (strain 168) GN=yolF PE=4 SV=1	649	12304	76.19	YGVADNIDYK
123	1::sw|O31989|YOLF_BACSU	SPBc2 prophage-derived uncharacterized protein YolF OS=Bacillus subtilis (strain 168) GN=yolF PE=4 SV=1	649	12304	20.81	IGMPYAQPDR	Oxidation (M)
123	1::sw|O31989|YOLF_BACSU	SPBc2 prophage-derived uncharacterized protein YolF OS=Bacillus subtilis (strain 168) GN=yolF PE=4 SV=1	649	12304	56.39	TEIPINQIVSIK
123	1::sw|O31989|YOLF_BACSU	SPBc2 prophage-derived uncharacterized protein YolF OS=Bacillus subtilis (strain 168) GN=yolF PE=4 SV=1	649	12304	67.21	TEIPINQIVSIK
123	1::sw|O31989|YOLF_BACSU	SPBc2 prophage-derived uncharacterized protein YolF OS=Bacillus subtilis (strain 168) GN=yolF PE=4 SV=1	649	12304	40.62	TEIPINQIVSIK
123	1::sw|O31989|YOLF_BACSU	SPBc2 prophage-derived uncharacterized protein YolF OS=Bacillus subtilis (strain 168) GN=yolF PE=4 SV=1	649	12304	45.57	ESDKYGVADNIDYK
123	1::sw|O31989|YOLF_BACSU	SPBc2 prophage-derived uncharacterized protein YolF OS=Bacillus subtilis (strain 168) GN=yolF PE=4 SV=1	649	12304	26.93	ESDKYGVADNIDYK
123	1::sw|O31989|YOLF_BACSU	SPBc2 prophage-derived uncharacterized protein YolF OS=Bacillus subtilis (strain 168) GN=yolF PE=4 SV=1	649	12304	42.02	ESDKYGVADNIDYK
123	1::sw|O31989|YOLF_BACSU	SPBc2 prophage-derived uncharacterized protein YolF OS=Bacillus subtilis (strain 168) GN=yolF PE=4 SV=1	649	12304	24.26	ESDKYGVADNIDYK
123	1::sw|O31989|YOLF_BACSU	SPBc2 prophage-derived uncharacterized protein YolF OS=Bacillus subtilis (strain 168) GN=yolF PE=4 SV=1	649	12304	100.81	FLVFLNGAQQFIQK
264	1::sw|O32031|YRRS_BACSU	Uncharacterized membrane protein YrrS OS=Bacillus subtilis (strain 168) GN=yrrS PE=4 SV=1	275	25318	46.49	VTEGGSSSDVEK
264	1::sw|O32031|YRRS_BACSU	Uncharacterized membrane protein YrrS OS=Bacillus subtilis (strain 168) GN=yrrS PE=4 SV=1	275	25318	40.56	VTEGGSSSDVEK
264	1::sw|O32031|YRRS_BACSU	Uncharacterized membrane protein YrrS OS=Bacillus subtilis (strain 168) GN=yrrS PE=4 SV=1	275	25318	44.76	VTEGGSSSDVEK
264	1::sw|O32031|YRRS_BACSU	Uncharacterized membrane protein YrrS OS=Bacillus subtilis (strain 168) GN=yrrS PE=4 SV=1	275	25318	63.6	VTEGGSSSDVEK
264	1::sw|O32031|YRRS_BACSU	Uncharacterized membrane protein YrrS OS=Bacillus subtilis (strain 168) GN=yrrS PE=4 SV=1	275	25318	33.22	VTEGGSSSDVEK
264	1::sw|O32031|YRRS_BACSU	Uncharacterized membrane protein YrrS OS=Bacillus subtilis (strain 168) GN=yrrS PE=4 SV=1	275	25318	55.8	YQVTITWVDEK
264	1::sw|O32031|YRRS_BACSU	Uncharacterized membrane protein YrrS OS=Bacillus subtilis (strain 168) GN=yrrS PE=4 SV=1	275	25318	49.26	KDDSDSDSSSDSAGDGLK
264	1::sw|O32031|YRRS_BACSU	Uncharacterized membrane protein YrrS OS=Bacillus subtilis (strain 168) GN=yrrS PE=4 SV=1	275	25318	42.76	KDDSDSDSSSDSAGDGLK
264	1::sw|O32031|YRRS_BACSU	Uncharacterized membrane protein YrrS OS=Bacillus subtilis (strain 168) GN=yrrS PE=4 SV=1	275	25318	27.97	KDDSDSDSSSDSAGDGLK
264	1::sw|O32031|YRRS_BACSU	Uncharacterized membrane protein YrrS OS=Bacillus subtilis (strain 168) GN=yrrS PE=4 SV=1	275	25318	41.58	KDDSDSDSSSDSAGDGLK
96	1::sw|O32038|SYD_BACSU	Aspartate--tRNA ligase OS=Bacillus subtilis (strain 168) GN=aspS PE=3 SV=1	857	66105	37.69	YYQIAR
96	1::sw|O32038|SYD_BACSU	Aspartate--tRNA ligase OS=Bacillus subtilis (strain 168) GN=aspS PE=3 SV=1	857	66105	30.65	YGSDKPDTR
96	1::sw|O32038|SYD_BACSU	Aspartate--tRNA ligase OS=Bacillus subtilis (strain 168) GN=aspS PE=3 SV=1	857	66105	30.41	YGSDKPDTR
96	1::sw|O32038|SYD_BACSU	Aspartate--tRNA ligase OS=Bacillus subtilis (strain 168) GN=aspS PE=3 SV=1	857	66105	39.69	YGSDKPDTR
96	1::sw|O32038|SYD_BACSU	Aspartate--tRNA ligase OS=Bacillus subtilis (strain 168) GN=aspS PE=3 SV=1	857	66105	32.37	YGSDKPDTR
96	1::sw|O32038|SYD_BACSU	Aspartate--tRNA ligase OS=Bacillus subtilis (strain 168) GN=aspS PE=3 SV=1	857	66105	21.62	YGSDKPDTR
96	1::sw|O32038|SYD_BACSU	Aspartate--tRNA ligase OS=Bacillus subtilis (strain 168) GN=aspS PE=3 SV=1	857	66105	90.41	EALAIAEGIR
96	1::sw|O32038|SYD_BACSU	Aspartate--tRNA ligase OS=Bacillus subtilis (strain 168) GN=aspS PE=3 SV=1	857	66105	39.43	EEGTVNPNLK
96	1::sw|O32038|SYD_BACSU	Aspartate--tRNA ligase OS=Bacillus subtilis (strain 168) GN=aspS PE=3 SV=1	857	66105	37.15	EEGTVNPNLK
96	1::sw|O32038|SYD_BACSU	Aspartate--tRNA ligase OS=Bacillus subtilis (strain 168) GN=aspS PE=3 SV=1	857	66105	41.84	QLLMVSGIER
96	1::sw|O32038|SYD_BACSU	Aspartate--tRNA ligase OS=Bacillus subtilis (strain 168) GN=aspS PE=3 SV=1	857	66105	80.17	GEELQLPLPR
96	1::sw|O32038|SYD_BACSU	Aspartate--tRNA ligase OS=Bacillus subtilis (strain 168) GN=aspS PE=3 SV=1	857	66105	45.95	NEYVLDIQGK
96	1::sw|O32038|SYD_BACSU	Aspartate--tRNA ligase OS=Bacillus subtilis (strain 168) GN=aspS PE=3 SV=1	857	66105	76.19	DLGGLIFIDLR
96	1::sw|O32038|SYD_BACSU	Aspartate--tRNA ligase OS=Bacillus subtilis (strain 168) GN=aspS PE=3 SV=1	857	66105	22	TYYCGDITEK
96	1::sw|O32038|SYD_BACSU	Aspartate--tRNA ligase OS=Bacillus subtilis (strain 168) GN=aspS PE=3 SV=1	857	66105	89.24	FDMLLTDVSDIVK
96	1::sw|O32038|SYD_BACSU	Aspartate--tRNA ligase OS=Bacillus subtilis (strain 168) GN=aspS PE=3 SV=1	857	66105	107.98	FDMLLTDVSDIVK
96	1::sw|O32038|SYD_BACSU	Aspartate--tRNA ligase OS=Bacillus subtilis (strain 168) GN=aspS PE=3 SV=1	857	66105	47.53	FDMLLTDVSDIVK
96	1::sw|O32038|SYD_BACSU	Aspartate--tRNA ligase OS=Bacillus subtilis (strain 168) GN=aspS PE=3 SV=1	857	66105	78.03	FDMLLTDVSDIVK
96	1::sw|O32038|SYD_BACSU	Aspartate--tRNA ligase OS=Bacillus subtilis (strain 168) GN=aspS PE=3 SV=1	857	66105	58.75	FDMLLTDVSDIVK
96	1::sw|O32038|SYD_BACSU	Aspartate--tRNA ligase OS=Bacillus subtilis (strain 168) GN=aspS PE=3 SV=1	857	66105	48.82	FDMLLTDVSDIVK
96	1::sw|O32038|SYD_BACSU	Aspartate--tRNA ligase OS=Bacillus subtilis (strain 168) GN=aspS PE=3 SV=1	857	66105	70.92	DIDALGAFAANYGAK
96	1::sw|O32038|SYD_BACSU	Aspartate--tRNA ligase OS=Bacillus subtilis (strain 168) GN=aspS PE=3 SV=1	857	66105	66.34	TGIVQVVFNPDVSK
96	1::sw|O32038|SYD_BACSU	Aspartate--tRNA ligase OS=Bacillus subtilis (strain 168) GN=aspS PE=3 SV=1	857	66105	32.76	FYAAHHPFTMPVR
96	1::sw|O32038|SYD_BACSU	Aspartate--tRNA ligase OS=Bacillus subtilis (strain 168) GN=aspS PE=3 SV=1	857	66105	82.37	EDLELIETAPEDMK
96	1::sw|O32038|SYD_BACSU	Aspartate--tRNA ligase OS=Bacillus subtilis (strain 168) GN=aspS PE=3 SV=1	857	66105	58.57	TGAIEIHADGVNVLNAAK
96	1::sw|O32038|SYD_BACSU	Aspartate--tRNA ligase OS=Bacillus subtilis (strain 168) GN=aspS PE=3 SV=1	857	66105	40.19	TGAIEIHADGVNVLNAAK
96	1::sw|O32038|SYD_BACSU	Aspartate--tRNA ligase OS=Bacillus subtilis (strain 168) GN=aspS PE=3 SV=1	857	66105	19.55	VHEGEFYALPQSPQLFK
354	1::sw|O32039|SYH_BACSU	Histidine--tRNA ligase OS=Bacillus subtilis (strain 168) GN=hisS PE=3 SV=1	190	48386	18.63	YERPQTGR
354	1::sw|O32039|SYH_BACSU	Histidine--tRNA ligase OS=Bacillus subtilis (strain 168) GN=hisS PE=3 SV=1	190	48386	32.25	EMYTFEDR
354	1::sw|O32039|SYH_BACSU	Histidine--tRNA ligase OS=Bacillus subtilis (strain 168) GN=hisS PE=3 SV=1	190	48386	18.7	LLAAIDAEKR
354	1::sw|O32039|SYH_BACSU	Histidine--tRNA ligase OS=Bacillus subtilis (strain 168) GN=hisS PE=3 SV=1	190	48386	18.45	LLAAIDAEKR
354	1::sw|O32039|SYH_BACSU	Histidine--tRNA ligase OS=Bacillus subtilis (strain 168) GN=hisS PE=3 SV=1	190	48386	19.24	LLAAIDAEKR
354	1::sw|O32039|SYH_BACSU	Histidine--tRNA ligase OS=Bacillus subtilis (strain 168) GN=hisS PE=3 SV=1	190	48386	19.06	LLAAIDAEKR
354	1::sw|O32039|SYH_BACSU	Histidine--tRNA ligase OS=Bacillus subtilis (strain 168) GN=hisS PE=3 SV=1	190	48386	20.33	LLAAIDAEKR
354	1::sw|O32039|SYH_BACSU	Histidine--tRNA ligase OS=Bacillus subtilis (strain 168) GN=hisS PE=3 SV=1	190	48386	39.63	LFANPVQPTK
354	1::sw|O32039|SYH_BACSU	Histidine--tRNA ligase OS=Bacillus subtilis (strain 168) GN=hisS PE=3 SV=1	190	48386	39.06	GVGESTDIVQK
354	1::sw|O32039|SYH_BACSU	Histidine--tRNA ligase OS=Bacillus subtilis (strain 168) GN=hisS PE=3 SV=1	190	48386	33.03	WQFVEQIMR
354	1::sw|O32039|SYH_BACSU	Histidine--tRNA ligase OS=Bacillus subtilis (strain 168) GN=hisS PE=3 SV=1	190	48386	19.89	LVINSLGDQDSR
354	1::sw|O32039|SYH_BACSU	Histidine--tRNA ligase OS=Bacillus subtilis (strain 168) GN=hisS PE=3 SV=1	190	48386	53.79	LVINSLGDQDSR
354	1::sw|O32039|SYH_BACSU	Histidine--tRNA ligase OS=Bacillus subtilis (strain 168) GN=hisS PE=3 SV=1	190	48386	43.31	LVINSLGDQDSR
354	1::sw|O32039|SYH_BACSU	Histidine--tRNA ligase OS=Bacillus subtilis (strain 168) GN=hisS PE=3 SV=1	190	48386	30.91	SLTLRPEGTAAAVR
354	1::sw|O32039|SYH_BACSU	Histidine--tRNA ligase OS=Bacillus subtilis (strain 168) GN=hisS PE=3 SV=1	190	48386	18.51	SLTLRPEGTAAAVR
354	1::sw|O32039|SYH_BACSU	Histidine--tRNA ligase OS=Bacillus subtilis (strain 168) GN=hisS PE=3 SV=1	190	48386	55.8	FIAILGEDELAQNK
325	1::sw|O32045|YRVD_BACSU	Uncharacterized protein YrvD OS=Bacillus subtilis (strain 168) GN=yrvD PE=4 SV=1	212	12227	71.69	SVEVDYLFGR
325	1::sw|O32045|YRVD_BACSU	Uncharacterized protein YrvD OS=Bacillus subtilis (strain 168) GN=yrvD PE=4 SV=1	212	12227	76.26	SVEVDYLFGR
325	1::sw|O32045|YRVD_BACSU	Uncharacterized protein YrvD OS=Bacillus subtilis (strain 168) GN=yrvD PE=4 SV=1	212	12227	68.69	QEDTHLADQTDTQDASAMIEK
325	1::sw|O32045|YRVD_BACSU	Uncharacterized protein YrvD OS=Bacillus subtilis (strain 168) GN=yrvD PE=4 SV=1	212	12227	54.56	QEDTHLADQTDTQDASAMIEK
28	1::sw|O32047|SECDF_BACSU	Protein translocase subunit SecDF OS=Bacillus subtilis (strain 168) GN=secDF PE=1 SV=2	2229	81603	40.8	GWFGVNK
28	1::sw|O32047|SECDF_BACSU	Protein translocase subunit SecDF OS=Bacillus subtilis (strain 168) GN=secDF PE=1 SV=2	2229	81603	38.71	FGEVTKK
28	1::sw|O32047|SECDF_BACSU	Protein translocase subunit SecDF OS=Bacillus subtilis (strain 168) GN=secDF PE=1 SV=2	2229	81603	18.16	FGEVTKK
28	1::sw|O32047|SECDF_BACSU	Protein translocase subunit SecDF OS=Bacillus subtilis (strain 168) GN=secDF PE=1 SV=2	2229	81603	25.06	GWFGVNKK
28	1::sw|O32047|SECDF_BACSU	Protein translocase subunit SecDF OS=Bacillus subtilis (strain 168) GN=secDF PE=1 SV=2	2229	81603	19.46	KGWFGVNK
28	1::sw|O32047|SECDF_BACSU	Protein translocase subunit SecDF OS=Bacillus subtilis (strain 168) GN=secDF PE=1 SV=2	2229	81603	20.85	KGWFGVNK
28	1::sw|O32047|SECDF_BACSU	Protein translocase subunit SecDF OS=Bacillus subtilis (strain 168) GN=secDF PE=1 SV=2	2229	81603	19.64	LTTEQVEK
28	1::sw|O32047|SECDF_BACSU	Protein translocase subunit SecDF OS=Bacillus subtilis (strain 168) GN=secDF PE=1 SV=2	2229	81603	36.03	IEVQSDHK
28	1::sw|O32047|SECDF_BACSU	Protein translocase subunit SecDF OS=Bacillus subtilis (strain 168) GN=secDF PE=1 SV=2	2229	81603	39.91	IEVQSDHK
28	1::sw|O32047|SECDF_BACSU	Protein translocase subunit SecDF OS=Bacillus subtilis (strain 168) GN=secDF PE=1 SV=2	2229	81603	45.42	IEVQSDHK
28	1::sw|O32047|SECDF_BACSU	Protein translocase subunit SecDF OS=Bacillus subtilis (strain 168) GN=secDF PE=1 SV=2	2229	81603	35.62	IEVQSDHK
28	1::sw|O32047|SECDF_BACSU	Protein translocase subunit SecDF OS=Bacillus subtilis (strain 168) GN=secDF PE=1 SV=2	2229	81603	35.28	IEVQSDHK
28	1::sw|O32047|SECDF_BACSU	Protein translocase subunit SecDF OS=Bacillus subtilis (strain 168) GN=secDF PE=1 SV=2	2229	81603	38.15	IEVQSDHK
28	1::sw|O32047|SECDF_BACSU	Protein translocase subunit SecDF OS=Bacillus subtilis (strain 168) GN=secDF PE=1 SV=2	2229	81603	20.29	IEVQSDHK
28	1::sw|O32047|SECDF_BACSU	Protein translocase subunit SecDF OS=Bacillus subtilis (strain 168) GN=secDF PE=1 SV=2	2229	81603	34.82	DADKFGEVTK
28	1::sw|O32047|SECDF_BACSU	Protein translocase subunit SecDF OS=Bacillus subtilis (strain 168) GN=secDF PE=1 SV=2	2229	81603	77.84	FLLALLVESR
28	1::sw|O32047|SECDF_BACSU	Protein translocase subunit SecDF OS=Bacillus subtilis (strain 168) GN=secDF PE=1 SV=2	2229	81603	62.52	VQLAGVTNQNR
28	1::sw|O32047|SECDF_BACSU	Protein translocase subunit SecDF OS=Bacillus subtilis (strain 168) GN=secDF PE=1 SV=2	2229	81603	67.88	VQLAGVTNQNR
28	1::sw|O32047|SECDF_BACSU	Protein translocase subunit SecDF OS=Bacillus subtilis (strain 168) GN=secDF PE=1 SV=2	2229	81603	79.89	VQLAGVTNQNR
28	1::sw|O32047|SECDF_BACSU	Protein translocase subunit SecDF OS=Bacillus subtilis (strain 168) GN=secDF PE=1 SV=2	2229	81603	66.49	VQLAGVTNQNR
28	1::sw|O32047|SECDF_BACSU	Protein translocase subunit SecDF OS=Bacillus subtilis (strain 168) GN=secDF PE=1 SV=2	2229	81603	71.88	VQLAGVTNQNR
28	1::sw|O32047|SECDF_BACSU	Protein translocase subunit SecDF OS=Bacillus subtilis (strain 168) GN=secDF PE=1 SV=2	2229	81603	41	VQLAGVTNQNR
28	1::sw|O32047|SECDF_BACSU	Protein translocase subunit SecDF OS=Bacillus subtilis (strain 168) GN=secDF PE=1 SV=2	2229	81603	20.41	VQLAGVTNQNR
28	1::sw|O32047|SECDF_BACSU	Protein translocase subunit SecDF OS=Bacillus subtilis (strain 168) GN=secDF PE=1 SV=2	2229	81603	19.29	IEGHFTAQEAK
28	1::sw|O32047|SECDF_BACSU	Protein translocase subunit SecDF OS=Bacillus subtilis (strain 168) GN=secDF PE=1 SV=2	2229	81603	53.36	IEGHFTAQEAK
28	1::sw|O32047|SECDF_BACSU	Protein translocase subunit SecDF OS=Bacillus subtilis (strain 168) GN=secDF PE=1 SV=2	2229	81603	42.38	IEGHFTAQEAK
28	1::sw|O32047|SECDF_BACSU	Protein translocase subunit SecDF OS=Bacillus subtilis (strain 168) GN=secDF PE=1 SV=2	2229	81603	27.65	IEGHFTAQEAK
28	1::sw|O32047|SECDF_BACSU	Protein translocase subunit SecDF OS=Bacillus subtilis (strain 168) GN=secDF PE=1 SV=2	2229	81603	23.47	IEGHFTAQEAK
28	1::sw|O32047|SECDF_BACSU	Protein translocase subunit SecDF OS=Bacillus subtilis (strain 168) GN=secDF PE=1 SV=2	2229	81603	61.53	LNLGIDFASGAR
28	1::sw|O32047|SECDF_BACSU	Protein translocase subunit SecDF OS=Bacillus subtilis (strain 168) GN=secDF PE=1 SV=2	2229	81603	33.67	FVGVPDKETIAK
28	1::sw|O32047|SECDF_BACSU	Protein translocase subunit SecDF OS=Bacillus subtilis (strain 168) GN=secDF PE=1 SV=2	2229	81603	62.71	FVGVPDKETIAK
28	1::sw|O32047|SECDF_BACSU	Protein translocase subunit SecDF OS=Bacillus subtilis (strain 168) GN=secDF PE=1 SV=2	2229	81603	32.17	FVGVPDKETIAK
28	1::sw|O32047|SECDF_BACSU	Protein translocase subunit SecDF OS=Bacillus subtilis (strain 168) GN=secDF PE=1 SV=2	2229	81603	60.44	FVGVPDKETIAK
28	1::sw|O32047|SECDF_BACSU	Protein translocase subunit SecDF OS=Bacillus subtilis (strain 168) GN=secDF PE=1 SV=2	2229	81603	26.16	FVGVPDKETIAK
28	1::sw|O32047|SECDF_BACSU	Protein translocase subunit SecDF OS=Bacillus subtilis (strain 168) GN=secDF PE=1 SV=2	2229	81603	40.36	FVGVPDKETIAK
28	1::sw|O32047|SECDF_BACSU	Protein translocase subunit SecDF OS=Bacillus subtilis (strain 168) GN=secDF PE=1 SV=2	2229	81603	31.39	FVGVPDKETIAK
28	1::sw|O32047|SECDF_BACSU	Protein translocase subunit SecDF OS=Bacillus subtilis (strain 168) GN=secDF PE=1 SV=2	2229	81603	50.83	FVGVPDKETIAK
28	1::sw|O32047|SECDF_BACSU	Protein translocase subunit SecDF OS=Bacillus subtilis (strain 168) GN=secDF PE=1 SV=2	2229	81603	39.93	FVGVPDKETIAK
28	1::sw|O32047|SECDF_BACSU	Protein translocase subunit SecDF OS=Bacillus subtilis (strain 168) GN=secDF PE=1 SV=2	2229	81603	22.87	FVGVPDKETIAK
28	1::sw|O32047|SECDF_BACSU	Protein translocase subunit SecDF OS=Bacillus subtilis (strain 168) GN=secDF PE=1 SV=2	2229	81603	69.21	DVLVSTVEALNR
28	1::sw|O32047|SECDF_BACSU	Protein translocase subunit SecDF OS=Bacillus subtilis (strain 168) GN=secDF PE=1 SV=2	2229	81603	66.11	DVLVSTVEALNR
28	1::sw|O32047|SECDF_BACSU	Protein translocase subunit SecDF OS=Bacillus subtilis (strain 168) GN=secDF PE=1 SV=2	2229	81603	61.77	DVLVSTVEALNR
28	1::sw|O32047|SECDF_BACSU	Protein translocase subunit SecDF OS=Bacillus subtilis (strain 168) GN=secDF PE=1 SV=2	2229	81603	78.03	DVLVSTVEALNR
28	1::sw|O32047|SECDF_BACSU	Protein translocase subunit SecDF OS=Bacillus subtilis (strain 168) GN=secDF PE=1 SV=2	2229	81603	34.9	DVLVSTVEALNR
28	1::sw|O32047|SECDF_BACSU	Protein translocase subunit SecDF OS=Bacillus subtilis (strain 168) GN=secDF PE=1 SV=2	2229	81603	24.25	DVLVSTVEALNR
28	1::sw|O32047|SECDF_BACSU	Protein translocase subunit SecDF OS=Bacillus subtilis (strain 168) GN=secDF PE=1 SV=2	2229	81603	100.73	DVLVSTVEALNR
28	1::sw|O32047|SECDF_BACSU	Protein translocase subunit SecDF OS=Bacillus subtilis (strain 168) GN=secDF PE=1 SV=2	2229	81603	84.72	DVLVSTVEALNR
28	1::sw|O32047|SECDF_BACSU	Protein translocase subunit SecDF OS=Bacillus subtilis (strain 168) GN=secDF PE=1 SV=2	2229	81603	82.98	EILATEAQLSFR
28	1::sw|O32047|SECDF_BACSU	Protein translocase subunit SecDF OS=Bacillus subtilis (strain 168) GN=secDF PE=1 SV=2	2229	81603	60.21	EILATEAQLSFR
28	1::sw|O32047|SECDF_BACSU	Protein translocase subunit SecDF OS=Bacillus subtilis (strain 168) GN=secDF PE=1 SV=2	2229	81603	35.04	EILATEAQLSFR
28	1::sw|O32047|SECDF_BACSU	Protein translocase subunit SecDF OS=Bacillus subtilis (strain 168) GN=secDF PE=1 SV=2	2229	81603	77.95	EILATEAQLSFR
28	1::sw|O32047|SECDF_BACSU	Protein translocase subunit SecDF OS=Bacillus subtilis (strain 168) GN=secDF PE=1 SV=2	2229	81603	58.63	EILATEAQLSFR
28	1::sw|O32047|SECDF_BACSU	Protein translocase subunit SecDF OS=Bacillus subtilis (strain 168) GN=secDF PE=1 SV=2	2229	81603	71.07	EILATEAQLSFR
28	1::sw|O32047|SECDF_BACSU	Protein translocase subunit SecDF OS=Bacillus subtilis (strain 168) GN=secDF PE=1 SV=2	2229	81603	52.17	DLASILNAGALPVK
28	1::sw|O32047|SECDF_BACSU	Protein translocase subunit SecDF OS=Bacillus subtilis (strain 168) GN=secDF PE=1 SV=2	2229	81603	84.28	DLASILNAGALPVK
28	1::sw|O32047|SECDF_BACSU	Protein translocase subunit SecDF OS=Bacillus subtilis (strain 168) GN=secDF PE=1 SV=2	2229	81603	72.93	DLASILNAGALPVK
28	1::sw|O32047|SECDF_BACSU	Protein translocase subunit SecDF OS=Bacillus subtilis (strain 168) GN=secDF PE=1 SV=2	2229	81603	69.64	YGSDPNVSTVSPTVGK
28	1::sw|O32047|SECDF_BACSU	Protein translocase subunit SecDF OS=Bacillus subtilis (strain 168) GN=secDF PE=1 SV=2	2229	81603	75.05	YGSDPNVSTVSPTVGK
28	1::sw|O32047|SECDF_BACSU	Protein translocase subunit SecDF OS=Bacillus subtilis (strain 168) GN=secDF PE=1 SV=2	2229	81603	55.21	YGSDPNVSTVSPTVGK
28	1::sw|O32047|SECDF_BACSU	Protein translocase subunit SecDF OS=Bacillus subtilis (strain 168) GN=secDF PE=1 SV=2	2229	81603	53.21	YGSDPNVSTVSPTVGK
28	1::sw|O32047|SECDF_BACSU	Protein translocase subunit SecDF OS=Bacillus subtilis (strain 168) GN=secDF PE=1 SV=2	2229	81603	61.76	YGSDPNVSTVSPTVGK
28	1::sw|O32047|SECDF_BACSU	Protein translocase subunit SecDF OS=Bacillus subtilis (strain 168) GN=secDF PE=1 SV=2	2229	81603	28.15	QTYDSTTNEPIVTIK
28	1::sw|O32047|SECDF_BACSU	Protein translocase subunit SecDF OS=Bacillus subtilis (strain 168) GN=secDF PE=1 SV=2	2229	81603	60.61	QTYDSTTNEPIVTIK
28	1::sw|O32047|SECDF_BACSU	Protein translocase subunit SecDF OS=Bacillus subtilis (strain 168) GN=secDF PE=1 SV=2	2229	81603	49.07	QTYDSTTNEPIVTIK
28	1::sw|O32047|SECDF_BACSU	Protein translocase subunit SecDF OS=Bacillus subtilis (strain 168) GN=secDF PE=1 SV=2	2229	81603	52.06	MAPNNQLVIWLDYDK
28	1::sw|O32047|SECDF_BACSU	Protein translocase subunit SecDF OS=Bacillus subtilis (strain 168) GN=secDF PE=1 SV=2	2229	81603	44.09	FVSAPNVSQELNTTDVK
28	1::sw|O32047|SECDF_BACSU	Protein translocase subunit SecDF OS=Bacillus subtilis (strain 168) GN=secDF PE=1 SV=2	2229	81603	61.02	FVSAPNVSQELNTTDVK
28	1::sw|O32047|SECDF_BACSU	Protein translocase subunit SecDF OS=Bacillus subtilis (strain 168) GN=secDF PE=1 SV=2	2229	81603	49.01	FVSAPNVSQELNTTDVK
28	1::sw|O32047|SECDF_BACSU	Protein translocase subunit SecDF OS=Bacillus subtilis (strain 168) GN=secDF PE=1 SV=2	2229	81603	59.36	FVSAPNVSQELNTTDVK
28	1::sw|O32047|SECDF_BACSU	Protein translocase subunit SecDF OS=Bacillus subtilis (strain 168) GN=secDF PE=1 SV=2	2229	81603	46.9	DKYGSDPNVSTVSPTVGK
28	1::sw|O32047|SECDF_BACSU	Protein translocase subunit SecDF OS=Bacillus subtilis (strain 168) GN=secDF PE=1 SV=2	2229	81603	25.85	DKYGSDPNVSTVSPTVGK
28	1::sw|O32047|SECDF_BACSU	Protein translocase subunit SecDF OS=Bacillus subtilis (strain 168) GN=secDF PE=1 SV=2	2229	81603	22.42	DKYGSDPNVSTVSPTVGK
28	1::sw|O32047|SECDF_BACSU	Protein translocase subunit SecDF OS=Bacillus subtilis (strain 168) GN=secDF PE=1 SV=2	2229	81603	41.27	ANVLGVSEPNIQIEGNNR
28	1::sw|O32047|SECDF_BACSU	Protein translocase subunit SecDF OS=Bacillus subtilis (strain 168) GN=secDF PE=1 SV=2	2229	81603	60.94	DFESLGMDPDTVVLSGEK
28	1::sw|O32047|SECDF_BACSU	Protein translocase subunit SecDF OS=Bacillus subtilis (strain 168) GN=secDF PE=1 SV=2	2229	81603	22.63	TFADLNHIVNLSLQQTFTR
28	1::sw|O32047|SECDF_BACSU	Protein translocase subunit SecDF OS=Bacillus subtilis (strain 168) GN=secDF PE=1 SV=2	2229	81603	39.58	TFADLNHIVNLSLQQTFTR
28	1::sw|O32047|SECDF_BACSU	Protein translocase subunit SecDF OS=Bacillus subtilis (strain 168) GN=secDF PE=1 SV=2	2229	81603	52.65	TFADLNHIVNLSLQQTFTR
28	1::sw|O32047|SECDF_BACSU	Protein translocase subunit SecDF OS=Bacillus subtilis (strain 168) GN=secDF PE=1 SV=2	2229	81603	43.97	TFADLNHIVNLSLQQTFTR
28	1::sw|O32047|SECDF_BACSU	Protein translocase subunit SecDF OS=Bacillus subtilis (strain 168) GN=secDF PE=1 SV=2	2229	81603	43.84	MAPNNQLVIWLDYDKGDSFK
28	1::sw|O32047|SECDF_BACSU	Protein translocase subunit SecDF OS=Bacillus subtilis (strain 168) GN=secDF PE=1 SV=2	2229	81603	41.27	HIMDIQDTDENTEPHTPFQK
28	1::sw|O32047|SECDF_BACSU	Protein translocase subunit SecDF OS=Bacillus subtilis (strain 168) GN=secDF PE=1 SV=2	2229	81603	34.76	HIMDIQDTDENTEPHTPFQK
28	1::sw|O32047|SECDF_BACSU	Protein translocase subunit SecDF OS=Bacillus subtilis (strain 168) GN=secDF PE=1 SV=2	2229	81603	60.49	LTTEQVEKDFESLGMDPDTVVLSGEK
28	1::sw|O32047|SECDF_BACSU	Protein translocase subunit SecDF OS=Bacillus subtilis (strain 168) GN=secDF PE=1 SV=2	2229	81603	55.23	LTTEQVEKDFESLGMDPDTVVLSGEK
111	1::sw|O32050|YRBG_BACSU	UPF0702 transmembrane protein YrbG OS=Bacillus subtilis (strain 168) GN=yrbG PE=3 SV=1	724	25271	46.87	IDEEAMK
111	1::sw|O32050|YRBG_BACSU	UPF0702 transmembrane protein YrbG OS=Bacillus subtilis (strain 168) GN=yrbG PE=3 SV=1	724	25271	34.86	WLLESLQK
111	1::sw|O32050|YRBG_BACSU	UPF0702 transmembrane protein YrbG OS=Bacillus subtilis (strain 168) GN=yrbG PE=3 SV=1	724	25271	28.77	WLLESLQK
111	1::sw|O32050|YRBG_BACSU	UPF0702 transmembrane protein YrbG OS=Bacillus subtilis (strain 168) GN=yrbG PE=3 SV=1	724	25271	25.26	WLLESLQK
111	1::sw|O32050|YRBG_BACSU	UPF0702 transmembrane protein YrbG OS=Bacillus subtilis (strain 168) GN=yrbG PE=3 SV=1	724	25271	23.8	WLLESLQK
111	1::sw|O32050|YRBG_BACSU	UPF0702 transmembrane protein YrbG OS=Bacillus subtilis (strain 168) GN=yrbG PE=3 SV=1	724	25271	37.65	KWLLESLQK
111	1::sw|O32050|YRBG_BACSU	UPF0702 transmembrane protein YrbG OS=Bacillus subtilis (strain 168) GN=yrbG PE=3 SV=1	724	25271	24.69	QLLDGKPTIIIK
111	1::sw|O32050|YRBG_BACSU	UPF0702 transmembrane protein YrbG OS=Bacillus subtilis (strain 168) GN=yrbG PE=3 SV=1	724	25271	36.03	QLLDGKPTIIIK
111	1::sw|O32050|YRBG_BACSU	UPF0702 transmembrane protein YrbG OS=Bacillus subtilis (strain 168) GN=yrbG PE=3 SV=1	724	25271	37.67	QLLDGKPTIIIK
111	1::sw|O32050|YRBG_BACSU	UPF0702 transmembrane protein YrbG OS=Bacillus subtilis (strain 168) GN=yrbG PE=3 SV=1	724	25271	21.17	QLLDGKPTIIIK
111	1::sw|O32050|YRBG_BACSU	UPF0702 transmembrane protein YrbG OS=Bacillus subtilis (strain 168) GN=yrbG PE=3 SV=1	724	25271	36.1	QLLDGKPTIIIK
111	1::sw|O32050|YRBG_BACSU	UPF0702 transmembrane protein YrbG OS=Bacillus subtilis (strain 168) GN=yrbG PE=3 SV=1	724	25271	27.33	QLLDGKPTIIIK
111	1::sw|O32050|YRBG_BACSU	UPF0702 transmembrane protein YrbG OS=Bacillus subtilis (strain 168) GN=yrbG PE=3 SV=1	724	25271	82.48	YNFDDLMVQLR
111	1::sw|O32050|YRBG_BACSU	UPF0702 transmembrane protein YrbG OS=Bacillus subtilis (strain 168) GN=yrbG PE=3 SV=1	724	25271	63.06	YNFDDLMVQLR
111	1::sw|O32050|YRBG_BACSU	UPF0702 transmembrane protein YrbG OS=Bacillus subtilis (strain 168) GN=yrbG PE=3 SV=1	724	25271	82.84	YNFDDLMVQLR
111	1::sw|O32050|YRBG_BACSU	UPF0702 transmembrane protein YrbG OS=Bacillus subtilis (strain 168) GN=yrbG PE=3 SV=1	724	25271	70.85	YNFDDLMVQLR
111	1::sw|O32050|YRBG_BACSU	UPF0702 transmembrane protein YrbG OS=Bacillus subtilis (strain 168) GN=yrbG PE=3 SV=1	724	25271	77.87	YNFDDLMVQLR
111	1::sw|O32050|YRBG_BACSU	UPF0702 transmembrane protein YrbG OS=Bacillus subtilis (strain 168) GN=yrbG PE=3 SV=1	724	25271	73.41	YNFDDLMVQLR
111	1::sw|O32050|YRBG_BACSU	UPF0702 transmembrane protein YrbG OS=Bacillus subtilis (strain 168) GN=yrbG PE=3 SV=1	724	25271	49.04	VADVSFAILEPSGK
111	1::sw|O32050|YRBG_BACSU	UPF0702 transmembrane protein YrbG OS=Bacillus subtilis (strain 168) GN=yrbG PE=3 SV=1	724	25271	68.61	VADVSFAILEPSGK
111	1::sw|O32050|YRBG_BACSU	UPF0702 transmembrane protein YrbG OS=Bacillus subtilis (strain 168) GN=yrbG PE=3 SV=1	724	25271	66.79	VADVSFAILEPSGK
111	1::sw|O32050|YRBG_BACSU	UPF0702 transmembrane protein YrbG OS=Bacillus subtilis (strain 168) GN=yrbG PE=3 SV=1	724	25271	47.84	VADVSFAILEPSGK
111	1::sw|O32050|YRBG_BACSU	UPF0702 transmembrane protein YrbG OS=Bacillus subtilis (strain 168) GN=yrbG PE=3 SV=1	724	25271	90.15	VADVSFAILEPSGK
111	1::sw|O32050|YRBG_BACSU	UPF0702 transmembrane protein YrbG OS=Bacillus subtilis (strain 168) GN=yrbG PE=3 SV=1	724	25271	90.56	VADVSFAILEPSGK
111	1::sw|O32050|YRBG_BACSU	UPF0702 transmembrane protein YrbG OS=Bacillus subtilis (strain 168) GN=yrbG PE=3 SV=1	724	25271	20.46	QLEMPLIIDGFIQTENLSR	Oxidation (M)
192	1::sw|O32052|YRBF_BACSU	UPF0092 membrane protein YrbF OS=Bacillus subtilis (strain 168) GN=yrbF PE=3 SV=1	391	9897	18.49	LTFDRR
192	1::sw|O32052|YRBF_BACSU	UPF0092 membrane protein YrbF OS=Bacillus subtilis (strain 168) GN=yrbF PE=3 SV=1	391	9897	23.01	LTFDRR
192	1::sw|O32052|YRBF_BACSU	UPF0092 membrane protein YrbF OS=Bacillus subtilis (strain 168) GN=yrbF PE=3 SV=1	391	9897	33.22	QMQEELK
192	1::sw|O32052|YRBF_BACSU	UPF0092 membrane protein YrbF OS=Bacillus subtilis (strain 168) GN=yrbF PE=3 SV=1	391	9897	46.2	QMQEELK
192	1::sw|O32052|YRBF_BACSU	UPF0092 membrane protein YrbF OS=Bacillus subtilis (strain 168) GN=yrbF PE=3 SV=1	391	9897	47.7	QMQEELK
192	1::sw|O32052|YRBF_BACSU	UPF0092 membrane protein YrbF OS=Bacillus subtilis (strain 168) GN=yrbF PE=3 SV=1	391	9897	45.34	QMQEELK
192	1::sw|O32052|YRBF_BACSU	UPF0092 membrane protein YrbF OS=Bacillus subtilis (strain 168) GN=yrbF PE=3 SV=1	391	9897	41.93	QMQEELK	Oxidation (M)
192	1::sw|O32052|YRBF_BACSU	UPF0092 membrane protein YrbF OS=Bacillus subtilis (strain 168) GN=yrbF PE=3 SV=1	391	9897	22.25	AIREVSAAE
192	1::sw|O32052|YRBF_BACSU	UPF0092 membrane protein YrbF OS=Bacillus subtilis (strain 168) GN=yrbF PE=3 SV=1	391	9897	45.4	QMQEELKK
192	1::sw|O32052|YRBF_BACSU	UPF0092 membrane protein YrbF OS=Bacillus subtilis (strain 168) GN=yrbF PE=3 SV=1	391	9897	34.25	QMQEELKK
192	1::sw|O32052|YRBF_BACSU	UPF0092 membrane protein YrbF OS=Bacillus subtilis (strain 168) GN=yrbF PE=3 SV=1	391	9897	48.55	GDSVVTIGGLHGTVDSIDESK
192	1::sw|O32052|YRBF_BACSU	UPF0092 membrane protein YrbF OS=Bacillus subtilis (strain 168) GN=yrbF PE=3 SV=1	391	9897	48.85	GDSVVTIGGLHGTVDSIDESK
192	1::sw|O32052|YRBF_BACSU	UPF0092 membrane protein YrbF OS=Bacillus subtilis (strain 168) GN=yrbF PE=3 SV=1	391	9897	20.17	KGDSVVTIGGLHGTVDSIDESK
192	1::sw|O32052|YRBF_BACSU	UPF0092 membrane protein YrbF OS=Bacillus subtilis (strain 168) GN=yrbF PE=3 SV=1	391	9897	74.52	KGDSVVTIGGLHGTVDSIDESK
192	1::sw|O32052|YRBF_BACSU	UPF0092 membrane protein YrbF OS=Bacillus subtilis (strain 168) GN=yrbF PE=3 SV=1	391	9897	71.98	KGDSVVTIGGLHGTVDSIDESK
192	1::sw|O32052|YRBF_BACSU	UPF0092 membrane protein YrbF OS=Bacillus subtilis (strain 168) GN=yrbF PE=3 SV=1	391	9897	75.57	KGDSVVTIGGLHGTVDSIDESK
192	1::sw|O32052|YRBF_BACSU	UPF0092 membrane protein YrbF OS=Bacillus subtilis (strain 168) GN=yrbF PE=3 SV=1	391	9897	55.8	KGDSVVTIGGLHGTVDSIDESK
796	1::sw|O32054|QUEA_BACSU	S-adenosylmethionine:tRNA ribosyltransferase-isomerase OS=Bacillus subtilis (strain 168) GN=queA PE=1 SV=1	28	38602	27.64	IISVGTTSTR
729	1::sw|O32055|RUVB_BACSU	Holliday junction ATP-dependent DNA helicase RuvB OS=Bacillus subtilis (strain 168) GN=ruvB PE=1 SV=2	37	37502	36.86	ITEDISQNALER
781	1::sw|O32064|YTZA_BACSU	UPF0716 protein YtzA OS=Bacillus subtilis (strain 168) GN=ytzA PE=3 SV=1	30	14259	29.63	GWCKPILFK
536	1::sw|O32065|YTZB_BACSU	Uncharacterized protein YtzB OS=Bacillus subtilis (strain 168) GN=ytzB PE=4 SV=1	85	11716	47.95	TGEIVDVIDTIAS
536	1::sw|O32065|YTZB_BACSU	Uncharacterized protein YtzB OS=Bacillus subtilis (strain 168) GN=ytzB PE=4 SV=1	85	11716	56.75	SAFGELEQYEVMVDAK
40	1::sw|O32076|YUAG_BACSU	Uncharacterized protein YuaG OS=Bacillus subtilis (strain 168) GN=yuaG PE=4 SV=1	1825	55959	53.94	VASQDLAK
40	1::sw|O32076|YUAG_BACSU	Uncharacterized protein YuaG OS=Bacillus subtilis (strain 168) GN=yuaG PE=4 SV=1	1825	55959	27.07	QLAEADAK
40	1::sw|O32076|YUAG_BACSU	Uncharacterized protein YuaG OS=Bacillus subtilis (strain 168) GN=yuaG PE=4 SV=1	1825	55959	29.8	QYDSEVK
40	1::sw|O32076|YUAG_BACSU	Uncharacterized protein YuaG OS=Bacillus subtilis (strain 168) GN=yuaG PE=4 SV=1	1825	55959	37.3	QYDSEVK
40	1::sw|O32076|YUAG_BACSU	Uncharacterized protein YuaG OS=Bacillus subtilis (strain 168) GN=yuaG PE=4 SV=1	1825	55959	18.79	QIELEEK
40	1::sw|O32076|YUAG_BACSU	Uncharacterized protein YuaG OS=Bacillus subtilis (strain 168) GN=yuaG PE=4 SV=1	1825	55959	38.98	FSQEVQR
40	1::sw|O32076|YUAG_BACSU	Uncharacterized protein YuaG OS=Bacillus subtilis (strain 168) GN=yuaG PE=4 SV=1	1825	55959	48.34	FSQEVQR
40	1::sw|O32076|YUAG_BACSU	Uncharacterized protein YuaG OS=Bacillus subtilis (strain 168) GN=yuaG PE=4 SV=1	1825	55959	30.87	FSQEVQR
40	1::sw|O32076|YUAG_BACSU	Uncharacterized protein YuaG OS=Bacillus subtilis (strain 168) GN=yuaG PE=4 SV=1	1825	55959	48.79	FSQEVQR
40	1::sw|O32076|YUAG_BACSU	Uncharacterized protein YuaG OS=Bacillus subtilis (strain 168) GN=yuaG PE=4 SV=1	1825	55959	49.02	FSQEVQR
40	1::sw|O32076|YUAG_BACSU	Uncharacterized protein YuaG OS=Bacillus subtilis (strain 168) GN=yuaG PE=4 SV=1	1825	55959	54.87	FSQEVQR
40	1::sw|O32076|YUAG_BACSU	Uncharacterized protein YuaG OS=Bacillus subtilis (strain 168) GN=yuaG PE=4 SV=1	1825	55959	34.83	YSIEAMAK
40	1::sw|O32076|YUAG_BACSU	Uncharacterized protein YuaG OS=Bacillus subtilis (strain 168) GN=yuaG PE=4 SV=1	1825	55959	39.27	EVLEGHLR
40	1::sw|O32076|YUAG_BACSU	Uncharacterized protein YuaG OS=Bacillus subtilis (strain 168) GN=yuaG PE=4 SV=1	1825	55959	36.24	ATEIAEAEK
40	1::sw|O32076|YUAG_BACSU	Uncharacterized protein YuaG OS=Bacillus subtilis (strain 168) GN=yuaG PE=4 SV=1	1825	55959	45.52	ATEIAEAEK
40	1::sw|O32076|YUAG_BACSU	Uncharacterized protein YuaG OS=Bacillus subtilis (strain 168) GN=yuaG PE=4 SV=1	1825	55959	29.09	ATEIAEAEK
40	1::sw|O32076|YUAG_BACSU	Uncharacterized protein YuaG OS=Bacillus subtilis (strain 168) GN=yuaG PE=4 SV=1	1825	55959	21.03	QYDSEVKK
40	1::sw|O32076|YUAG_BACSU	Uncharacterized protein YuaG OS=Bacillus subtilis (strain 168) GN=yuaG PE=4 SV=1	1825	55959	48.99	KYSIEAMAK
40	1::sw|O32076|YUAG_BACSU	Uncharacterized protein YuaG OS=Bacillus subtilis (strain 168) GN=yuaG PE=4 SV=1	1825	55959	19.7	EMLENFSGK
40	1::sw|O32076|YUAG_BACSU	Uncharacterized protein YuaG OS=Bacillus subtilis (strain 168) GN=yuaG PE=4 SV=1	1825	55959	35.85	EMLENFSGK
40	1::sw|O32076|YUAG_BACSU	Uncharacterized protein YuaG OS=Bacillus subtilis (strain 168) GN=yuaG PE=4 SV=1	1825	55959	26.19	NVHVDEGGNR
40	1::sw|O32076|YUAG_BACSU	Uncharacterized protein YuaG OS=Bacillus subtilis (strain 168) GN=yuaG PE=4 SV=1	1825	55959	48.13	NVHVDEGGNR
40	1::sw|O32076|YUAG_BACSU	Uncharacterized protein YuaG OS=Bacillus subtilis (strain 168) GN=yuaG PE=4 SV=1	1825	55959	31.47	NVHVDEGGNR
40	1::sw|O32076|YUAG_BACSU	Uncharacterized protein YuaG OS=Bacillus subtilis (strain 168) GN=yuaG PE=4 SV=1	1825	55959	25.5	DADIATAEADK
40	1::sw|O32076|YUAG_BACSU	Uncharacterized protein YuaG OS=Bacillus subtilis (strain 168) GN=yuaG PE=4 SV=1	1825	55959	18.91	QAAAPLSNIDK
40	1::sw|O32076|YUAG_BACSU	Uncharacterized protein YuaG OS=Bacillus subtilis (strain 168) GN=yuaG PE=4 SV=1	1825	55959	28.25	QAAAPLSNIDK
40	1::sw|O32076|YUAG_BACSU	Uncharacterized protein YuaG OS=Bacillus subtilis (strain 168) GN=yuaG PE=4 SV=1	1825	55959	64.48	YSVEQSAAAEK
40	1::sw|O32076|YUAG_BACSU	Uncharacterized protein YuaG OS=Bacillus subtilis (strain 168) GN=yuaG PE=4 SV=1	1825	55959	77.74	YSVEQSAAAEK
40	1::sw|O32076|YUAG_BACSU	Uncharacterized protein YuaG OS=Bacillus subtilis (strain 168) GN=yuaG PE=4 SV=1	1825	55959	65.26	AKGETEAEVIR
40	1::sw|O32076|YUAG_BACSU	Uncharacterized protein YuaG OS=Bacillus subtilis (strain 168) GN=yuaG PE=4 SV=1	1825	55959	42.4	AKGETEAEVIR
40	1::sw|O32076|YUAG_BACSU	Uncharacterized protein YuaG OS=Bacillus subtilis (strain 168) GN=yuaG PE=4 SV=1	1825	55959	26.72	NGYLESLGKPR
40	1::sw|O32076|YUAG_BACSU	Uncharacterized protein YuaG OS=Bacillus subtilis (strain 168) GN=yuaG PE=4 SV=1	1825	55959	48.55	QSINELTNEIK
40	1::sw|O32076|YUAG_BACSU	Uncharacterized protein YuaG OS=Bacillus subtilis (strain 168) GN=yuaG PE=4 SV=1	1825	55959	67.94	QQVTEQEMQVK
40	1::sw|O32076|YUAG_BACSU	Uncharacterized protein YuaG OS=Bacillus subtilis (strain 168) GN=yuaG PE=4 SV=1	1825	55959	73.42	QQVTEQEMQVK
40	1::sw|O32076|YUAG_BACSU	Uncharacterized protein YuaG OS=Bacillus subtilis (strain 168) GN=yuaG PE=4 SV=1	1825	55959	50.67	QQVTEQEMQVK
40	1::sw|O32076|YUAG_BACSU	Uncharacterized protein YuaG OS=Bacillus subtilis (strain 168) GN=yuaG PE=4 SV=1	1825	55959	21.1	QQVTEQEMQVK	Oxidation (M)
40	1::sw|O32076|YUAG_BACSU	Uncharacterized protein YuaG OS=Bacillus subtilis (strain 168) GN=yuaG PE=4 SV=1	1825	55959	110.47	ANADQAYDLETAR
40	1::sw|O32076|YUAG_BACSU	Uncharacterized protein YuaG OS=Bacillus subtilis (strain 168) GN=yuaG PE=4 SV=1	1825	55959	110.21	ANADQAYDLETAR
40	1::sw|O32076|YUAG_BACSU	Uncharacterized protein YuaG OS=Bacillus subtilis (strain 168) GN=yuaG PE=4 SV=1	1825	55959	105.33	ANADQAYDLETAR
40	1::sw|O32076|YUAG_BACSU	Uncharacterized protein YuaG OS=Bacillus subtilis (strain 168) GN=yuaG PE=4 SV=1	1825	55959	115.34	ANADQAYDLETAR
40	1::sw|O32076|YUAG_BACSU	Uncharacterized protein YuaG OS=Bacillus subtilis (strain 168) GN=yuaG PE=4 SV=1	1825	55959	69.16	SILGSMTVEEIYK
40	1::sw|O32076|YUAG_BACSU	Uncharacterized protein YuaG OS=Bacillus subtilis (strain 168) GN=yuaG PE=4 SV=1	1825	55959	27.55	SILGSMTVEEIYK
40	1::sw|O32076|YUAG_BACSU	Uncharacterized protein YuaG OS=Bacillus subtilis (strain 168) GN=yuaG PE=4 SV=1	1825	55959	24.82	SILGSMTVEEIYK
40	1::sw|O32076|YUAG_BACSU	Uncharacterized protein YuaG OS=Bacillus subtilis (strain 168) GN=yuaG PE=4 SV=1	1825	55959	58.48	SILGSMTVEEIYK
40	1::sw|O32076|YUAG_BACSU	Uncharacterized protein YuaG OS=Bacillus subtilis (strain 168) GN=yuaG PE=4 SV=1	1825	55959	27.76	SILGSMTVEEIYK	Oxidation (M)
40	1::sw|O32076|YUAG_BACSU	Uncharacterized protein YuaG OS=Bacillus subtilis (strain 168) GN=yuaG PE=4 SV=1	1825	55959	90.93	DADIATAEADKETR
40	1::sw|O32076|YUAG_BACSU	Uncharacterized protein YuaG OS=Bacillus subtilis (strain 168) GN=yuaG PE=4 SV=1	1825	55959	65.73	DADIATAEADKETR
40	1::sw|O32076|YUAG_BACSU	Uncharacterized protein YuaG OS=Bacillus subtilis (strain 168) GN=yuaG PE=4 SV=1	1825	55959	47.93	DADIATAEADKETR
40	1::sw|O32076|YUAG_BACSU	Uncharacterized protein YuaG OS=Bacillus subtilis (strain 168) GN=yuaG PE=4 SV=1	1825	55959	85.63	DADIATAEADKETR
40	1::sw|O32076|YUAG_BACSU	Uncharacterized protein YuaG OS=Bacillus subtilis (strain 168) GN=yuaG PE=4 SV=1	1825	55959	91.3	ITVVDTGGSGESSGANK
40	1::sw|O32076|YUAG_BACSU	Uncharacterized protein YuaG OS=Bacillus subtilis (strain 168) GN=yuaG PE=4 SV=1	1825	55959	109.62	ITVVDTGGSGESSGANK
40	1::sw|O32076|YUAG_BACSU	Uncharacterized protein YuaG OS=Bacillus subtilis (strain 168) GN=yuaG PE=4 SV=1	1825	55959	95.91	ITVVDTGGSGESSGANK
40	1::sw|O32076|YUAG_BACSU	Uncharacterized protein YuaG OS=Bacillus subtilis (strain 168) GN=yuaG PE=4 SV=1	1825	55959	83.6	IGGSIGEIATAAEQFLGK
40	1::sw|O32076|YUAG_BACSU	Uncharacterized protein YuaG OS=Bacillus subtilis (strain 168) GN=yuaG PE=4 SV=1	1825	55959	32.55	TAGPDEALIVTGSYLGNK
40	1::sw|O32076|YUAG_BACSU	Uncharacterized protein YuaG OS=Bacillus subtilis (strain 168) GN=yuaG PE=4 SV=1	1825	55959	80.44	VTSYATNLMSSLQESLK
40	1::sw|O32076|YUAG_BACSU	Uncharacterized protein YuaG OS=Bacillus subtilis (strain 168) GN=yuaG PE=4 SV=1	1825	55959	85.69	VTSYATNLMSSLQESLK
40	1::sw|O32076|YUAG_BACSU	Uncharacterized protein YuaG OS=Bacillus subtilis (strain 168) GN=yuaG PE=4 SV=1	1825	55959	39.7	IAAAFEQYGQAAIFDMIVK
40	1::sw|O32076|YUAG_BACSU	Uncharacterized protein YuaG OS=Bacillus subtilis (strain 168) GN=yuaG PE=4 SV=1	1825	55959	40.82	IAAAFEQYGQAAIFDMIVK
40	1::sw|O32076|YUAG_BACSU	Uncharacterized protein YuaG OS=Bacillus subtilis (strain 168) GN=yuaG PE=4 SV=1	1825	55959	22.02	GGGTFVLPVFQQAEPLSLLSSK
836	1::sw|O32077|YUAF_BACSU	Uncharacterized membrane protein YuaF OS=Bacillus subtilis (strain 168) GN=yuaF PE=1 SV=1	22	18706	21.88	VITAVPVDGFGEVVIEGIGGTISK
217	1::sw|O32086|YUBA_BACSU	UPF0118 membrane protein YubA OS=Bacillus subtilis (strain 168) GN=yubA PE=3 SV=1	335	43697	25.11	KLPVYILK
217	1::sw|O32086|YUBA_BACSU	UPF0118 membrane protein YubA OS=Bacillus subtilis (strain 168) GN=yubA PE=3 SV=1	335	43697	31.65	LISPQIMGK
217	1::sw|O32086|YUBA_BACSU	UPF0118 membrane protein YubA OS=Bacillus subtilis (strain 168) GN=yubA PE=3 SV=1	335	43697	72.3	YVDVVENQTK
217	1::sw|O32086|YUBA_BACSU	UPF0118 membrane protein YubA OS=Bacillus subtilis (strain 168) GN=yubA PE=3 SV=1	335	43697	43.55	YVDVVENQTK
217	1::sw|O32086|YUBA_BACSU	UPF0118 membrane protein YubA OS=Bacillus subtilis (strain 168) GN=yubA PE=3 SV=1	335	43697	47.93	YVDVVENQTK
217	1::sw|O32086|YUBA_BACSU	UPF0118 membrane protein YubA OS=Bacillus subtilis (strain 168) GN=yubA PE=3 SV=1	335	43697	38.86	YVDVVENQTK
217	1::sw|O32086|YUBA_BACSU	UPF0118 membrane protein YubA OS=Bacillus subtilis (strain 168) GN=yubA PE=3 SV=1	335	43697	61.12	YVDVVENQTK
217	1::sw|O32086|YUBA_BACSU	UPF0118 membrane protein YubA OS=Bacillus subtilis (strain 168) GN=yubA PE=3 SV=1	335	43697	61.53	METLQTWSGR
217	1::sw|O32086|YUBA_BACSU	UPF0118 membrane protein YubA OS=Bacillus subtilis (strain 168) GN=yubA PE=3 SV=1	335	43697	45.57	MQSHLYDEEK
217	1::sw|O32086|YUBA_BACSU	UPF0118 membrane protein YubA OS=Bacillus subtilis (strain 168) GN=yubA PE=3 SV=1	335	43697	23.75	VITTHLFDWFK
217	1::sw|O32086|YUBA_BACSU	UPF0118 membrane protein YubA OS=Bacillus subtilis (strain 168) GN=yubA PE=3 SV=1	335	43697	51.09	VITTHLFDWFK
217	1::sw|O32086|YUBA_BACSU	UPF0118 membrane protein YubA OS=Bacillus subtilis (strain 168) GN=yubA PE=3 SV=1	335	43697	55.4	EQTYTVLSEMNHR
217	1::sw|O32086|YUBA_BACSU	UPF0118 membrane protein YubA OS=Bacillus subtilis (strain 168) GN=yubA PE=3 SV=1	335	43697	45.17	QLIGSNFVNQAQQTMNINISDLATK
[truncated: 11,687 more rows]

## Sheet: S1c
Table S1: Proteins identified in the Bacillus subtilis spore inner membrane fraction
c. Mascot search result details of Replicate 2
Protein hit number	Protein accession	Protein description	Protein score	Protein mass	Peptide score	Peptide sequence	Peptide variable modification
238	1::sw|C0H3X3|YEZF_BACSU	Uncharacterized membrane protein YezF OS=Bacillus subtilis (strain 168) GN=yezF PE=4 SV=1	395	8554	76.84	PNISLINAVFR
238	1::sw|C0H3X3|YEZF_BACSU	Uncharacterized membrane protein YezF OS=Bacillus subtilis (strain 168) GN=yezF PE=4 SV=1	395	8554	108.4	PNISLINAVFR
238	1::sw|C0H3X3|YEZF_BACSU	Uncharacterized membrane protein YezF OS=Bacillus subtilis (strain 168) GN=yezF PE=4 SV=1	395	8554	112.04	IACGLTIMSAASAK
238	1::sw|C0H3X3|YEZF_BACSU	Uncharacterized membrane protein YezF OS=Bacillus subtilis (strain 168) GN=yezF PE=4 SV=1	395	8554	65.61	IACGLTIMSAASAK
238	1::sw|C0H3X3|YEZF_BACSU	Uncharacterized membrane protein YezF OS=Bacillus subtilis (strain 168) GN=yezF PE=4 SV=1	395	8554	78.41	IACGLTIMSAASAK
238	1::sw|C0H3X3|YEZF_BACSU	Uncharacterized membrane protein YezF OS=Bacillus subtilis (strain 168) GN=yezF PE=4 SV=1	395	8554	36.28	IACGLTIMSAASAK
238	1::sw|C0H3X3|YEZF_BACSU	Uncharacterized membrane protein YezF OS=Bacillus subtilis (strain 168) GN=yezF PE=4 SV=1	395	8554	44.53	MHLFYIFMGAMK
665	1::sw|C0H3X7|MPRF_BACSU	Phosphatidylglycerol lysyltransferase OS=Bacillus subtilis (strain 168) GN=mprF PE=1 SV=1	73	96317	18.02	LVVLGDPSGQR
665	1::sw|C0H3X7|MPRF_BACSU	Phosphatidylglycerol lysyltransferase OS=Bacillus subtilis (strain 168) GN=mprF PE=1 SV=1	73	96317	40.47	LVVLGDPSGQR
665	1::sw|C0H3X7|MPRF_BACSU	Phosphatidylglycerol lysyltransferase OS=Bacillus subtilis (strain 168) GN=mprF PE=1 SV=1	73	96317	46.68	FAAVIFNNVR
665	1::sw|C0H3X7|MPRF_BACSU	Phosphatidylglycerol lysyltransferase OS=Bacillus subtilis (strain 168) GN=mprF PE=1 SV=1	73	96317	33.35	AGDEENADKVK
574	1::sw|C0H461|YRZQ_BACSU	Uncharacterized protein YrzQ OS=Bacillus subtilis (strain 168) GN=yrzQ PE=4 SV=1	97	5039	49.68	MATQSDMLNNR
574	1::sw|C0H461|YRZQ_BACSU	Uncharacterized protein YrzQ OS=Bacillus subtilis (strain 168) GN=yrzQ PE=4 SV=1	97	5039	69.59	TMTSLLAMGAGALVYR
131	1::sw|C0SP90|YTHA_BACSU	Putative cytochrome bd menaquinol oxidase subunit I OS=Bacillus subtilis (strain 168) GN=ythA PE=1 SV=1	800	49238	29.82	DDHYAIMAK
131	1::sw|C0SP90|YTHA_BACSU	Putative cytochrome bd menaquinol oxidase subunit I OS=Bacillus subtilis (strain 168) GN=ythA PE=1 SV=1	800	49238	24.13	DDHYAIMAK
131	1::sw|C0SP90|YTHA_BACSU	Putative cytochrome bd menaquinol oxidase subunit I OS=Bacillus subtilis (strain 168) GN=ythA PE=1 SV=1	800	49238	27.06	DDHYAIMAK
131	1::sw|C0SP90|YTHA_BACSU	Putative cytochrome bd menaquinol oxidase subunit I OS=Bacillus subtilis (strain 168) GN=ythA PE=1 SV=1	800	49238	84.33	LAGAEGLFETR
131	1::sw|C0SP90|YTHA_BACSU	Putative cytochrome bd menaquinol oxidase subunit I OS=Bacillus subtilis (strain 168) GN=ythA PE=1 SV=1	800	49238	91.7	LAGAEGLFETR
131	1::sw|C0SP90|YTHA_BACSU	Putative cytochrome bd menaquinol oxidase subunit I OS=Bacillus subtilis (strain 168) GN=ythA PE=1 SV=1	800	49238	85.57	LAGAEGLFETR
131	1::sw|C0SP90|YTHA_BACSU	Putative cytochrome bd menaquinol oxidase subunit I OS=Bacillus subtilis (strain 168) GN=ythA PE=1 SV=1	800	49238	76.83	LAGAEGLFETR
131	1::sw|C0SP90|YTHA_BACSU	Putative cytochrome bd menaquinol oxidase subunit I OS=Bacillus subtilis (strain 168) GN=ythA PE=1 SV=1	800	49238	75.76	LAGAEGLFETR
131	1::sw|C0SP90|YTHA_BACSU	Putative cytochrome bd menaquinol oxidase subunit I OS=Bacillus subtilis (strain 168) GN=ythA PE=1 SV=1	800	49238	78.57	LAGAEGLFETR
131	1::sw|C0SP90|YTHA_BACSU	Putative cytochrome bd menaquinol oxidase subunit I OS=Bacillus subtilis (strain 168) GN=ythA PE=1 SV=1	800	49238	44.53	LAGAEGLFETR
131	1::sw|C0SP90|YTHA_BACSU	Putative cytochrome bd menaquinol oxidase subunit I OS=Bacillus subtilis (strain 168) GN=ythA PE=1 SV=1	800	49238	87.18	LAGAEGLFETR
131	1::sw|C0SP90|YTHA_BACSU	Putative cytochrome bd menaquinol oxidase subunit I OS=Bacillus subtilis (strain 168) GN=ythA PE=1 SV=1	800	49238	56.27	LAGAEGLFETR
131	1::sw|C0SP90|YTHA_BACSU	Putative cytochrome bd menaquinol oxidase subunit I OS=Bacillus subtilis (strain 168) GN=ythA PE=1 SV=1	800	49238	100.76	LAGAEGLFETR
131	1::sw|C0SP90|YTHA_BACSU	Putative cytochrome bd menaquinol oxidase subunit I OS=Bacillus subtilis (strain 168) GN=ythA PE=1 SV=1	800	49238	31.89	HPVDEDLNTAES
131	1::sw|C0SP90|YTHA_BACSU	Putative cytochrome bd menaquinol oxidase subunit I OS=Bacillus subtilis (strain 168) GN=ythA PE=1 SV=1	800	49238	57.74	HPVDEDLNTAES
131	1::sw|C0SP90|YTHA_BACSU	Putative cytochrome bd menaquinol oxidase subunit I OS=Bacillus subtilis (strain 168) GN=ythA PE=1 SV=1	800	49238	47.64	KHPVDEDLNTAES
131	1::sw|C0SP90|YTHA_BACSU	Putative cytochrome bd menaquinol oxidase subunit I OS=Bacillus subtilis (strain 168) GN=ythA PE=1 SV=1	800	49238	63.27	KHPVDEDLNTAES
131	1::sw|C0SP90|YTHA_BACSU	Putative cytochrome bd menaquinol oxidase subunit I OS=Bacillus subtilis (strain 168) GN=ythA PE=1 SV=1	800	49238	45.57	SHAPLAIGGFTDPNEEK
131	1::sw|C0SP90|YTHA_BACSU	Putative cytochrome bd menaquinol oxidase subunit I OS=Bacillus subtilis (strain 168) GN=ythA PE=1 SV=1	800	49238	29.41	SHAPLAIGGFTDPNEEK
131	1::sw|C0SP90|YTHA_BACSU	Putative cytochrome bd menaquinol oxidase subunit I OS=Bacillus subtilis (strain 168) GN=ythA PE=1 SV=1	800	49238	38.3	SHAPLAIGGFTDPNEEK
131	1::sw|C0SP90|YTHA_BACSU	Putative cytochrome bd menaquinol oxidase subunit I OS=Bacillus subtilis (strain 168) GN=ythA PE=1 SV=1	800	49238	28.24	SHAPLAIGGFTDPNEEK
131	1::sw|C0SP90|YTHA_BACSU	Putative cytochrome bd menaquinol oxidase subunit I OS=Bacillus subtilis (strain 168) GN=ythA PE=1 SV=1	800	49238	25.51	WAIEIPWALSFLAANR
131	1::sw|C0SP90|YTHA_BACSU	Putative cytochrome bd menaquinol oxidase subunit I OS=Bacillus subtilis (strain 168) GN=ythA PE=1 SV=1	800	49238	64.37	WAIEIPWALSFLAANR
131	1::sw|C0SP90|YTHA_BACSU	Putative cytochrome bd menaquinol oxidase subunit I OS=Bacillus subtilis (strain 168) GN=ythA PE=1 SV=1	800	49238	31.81	WAIEIPWALSFLAANR
334	1::sw|C0SP93|ACCD_BACSU	Acetyl-coenzyme A carboxylase carboxyl transferase subunit beta OS=Bacillus subtilis (strain 168) GN=accD PE=1 SV=1	243	32242	20.83	ITLAIEKAK
334	1::sw|C0SP93|ACCD_BACSU	Acetyl-coenzyme A carboxylase carboxyl transferase subunit beta OS=Bacillus subtilis (strain 168) GN=accD PE=1 SV=1	243	32242	23.12	ITLAIEKAK
334	1::sw|C0SP93|ACCD_BACSU	Acetyl-coenzyme A carboxylase carboxyl transferase subunit beta OS=Bacillus subtilis (strain 168) GN=accD PE=1 SV=1	243	32242	24.26	ITLAIEKAK
334	1::sw|C0SP93|ACCD_BACSU	Acetyl-coenzyme A carboxylase carboxyl transferase subunit beta OS=Bacillus subtilis (strain 168) GN=accD PE=1 SV=1	243	32242	35.94	IIEQTIGEK
334	1::sw|C0SP93|ACCD_BACSU	Acetyl-coenzyme A carboxylase carboxyl transferase subunit beta OS=Bacillus subtilis (strain 168) GN=accD PE=1 SV=1	243	32242	44.68	IIEQTIGEK
334	1::sw|C0SP93|ACCD_BACSU	Acetyl-coenzyme A carboxylase carboxyl transferase subunit beta OS=Bacillus subtilis (strain 168) GN=accD PE=1 SV=1	243	32242	27.75	YASVPSDQAK
334	1::sw|C0SP93|ACCD_BACSU	Acetyl-coenzyme A carboxylase carboxyl transferase subunit beta OS=Bacillus subtilis (strain 168) GN=accD PE=1 SV=1	243	32242	35.2	YASVPSDQAK
334	1::sw|C0SP93|ACCD_BACSU	Acetyl-coenzyme A carboxylase carboxyl transferase subunit beta OS=Bacillus subtilis (strain 168) GN=accD PE=1 SV=1	243	32242	39.96	HDVPEGIMTK
334	1::sw|C0SP93|ACCD_BACSU	Acetyl-coenzyme A carboxylase carboxyl transferase subunit beta OS=Bacillus subtilis (strain 168) GN=accD PE=1 SV=1	243	32242	28.67	HDVPEGIMTK
334	1::sw|C0SP93|ACCD_BACSU	Acetyl-coenzyme A carboxylase carboxyl transferase subunit beta OS=Bacillus subtilis (strain 168) GN=accD PE=1 SV=1	243	32242	48.45	HGQLDAVIHR
334	1::sw|C0SP93|ACCD_BACSU	Acetyl-coenzyme A carboxylase carboxyl transferase subunit beta OS=Bacillus subtilis (strain 168) GN=accD PE=1 SV=1	243	32242	64.76	MQEGVLSLMQMAK
334	1::sw|C0SP93|ACCD_BACSU	Acetyl-coenzyme A carboxylase carboxyl transferase subunit beta OS=Bacillus subtilis (strain 168) GN=accD PE=1 SV=1	243	32242	37.8	MQEGVLSLMQMAK
334	1::sw|C0SP93|ACCD_BACSU	Acetyl-coenzyme A carboxylase carboxyl transferase subunit beta OS=Bacillus subtilis (strain 168) GN=accD PE=1 SV=1	243	32242	54.13	LPEDFQTAEFLLK
334	1::sw|C0SP93|ACCD_BACSU	Acetyl-coenzyme A carboxylase carboxyl transferase subunit beta OS=Bacillus subtilis (strain 168) GN=accD PE=1 SV=1	243	32242	47.09	LPEDFQTAEFLLK
943	1::sw|C0SP94|YHFQ_BACSU	Putative ABC transporter substrate-binding lipoprotein YhfQ OS=Bacillus subtilis (strain 168) GN=yhfQ PE=1 SV=1	29	35524	29.41	TDPDVIILMTGK
920	1::sw|C0SP95|YCNJ_BACSU	Copper transport protein YcnJ OS=Bacillus subtilis (strain 168) GN=ycnJ PE=1 SV=1	32	59757	24.76	VTDHNGDPVK
920	1::sw|C0SP95|YCNJ_BACSU	Copper transport protein YcnJ OS=Bacillus subtilis (strain 168) GN=ycnJ PE=1 SV=1	32	59757	27.47	VTDHNGDPVK
639	1::sw|C0SP98|YKFD_BACSU	Putative oligopeptide transport ATP-binding protein YkfD OS=Bacillus subtilis (strain 168) GN=ykfD PE=3 SV=1	79	37546	19.68	QRIGIAR
639	1::sw|C0SP98|YKFD_BACSU	Putative oligopeptide transport ATP-binding protein YkfD OS=Bacillus subtilis (strain 168) GN=ykfD PE=3 SV=1	79	37546	37.18	GTNLHALSEK
639	1::sw|C0SP98|YKFD_BACSU	Putative oligopeptide transport ATP-binding protein YkfD OS=Bacillus subtilis (strain 168) GN=ykfD PE=3 SV=1	79	37546	44.31	AVDGVTFQIR
639	1::sw|C0SP98|YKFD_BACSU	Putative oligopeptide transport ATP-binding protein YkfD OS=Bacillus subtilis (strain 168) GN=ykfD PE=3 SV=1	79	37546	27.79	LPLLEVSQLK
639	1::sw|C0SP98|YKFD_BACSU	Putative oligopeptide transport ATP-binding protein YkfD OS=Bacillus subtilis (strain 168) GN=ykfD PE=3 SV=1	79	37546	25.96	LYQPTEGSVTYR
639	1::sw|C0SP98|YKFD_BACSU	Putative oligopeptide transport ATP-binding protein YkfD OS=Bacillus subtilis (strain 168) GN=ykfD PE=3 SV=1	79	37546	31.27	LLVVDELLEAVGLHPDFGSR
68	1::sw|C0SPB0|YTCI_BACSU	Uncharacterized acyl--CoA ligase YtcI OS=Bacillus subtilis (strain 168) GN=ytcI PE=3 SV=1	1336	59573	40.49	IEHAEVK
68	1::sw|C0SPB0|YTCI_BACSU	Uncharacterized acyl--CoA ligase YtcI OS=Bacillus subtilis (strain 168) GN=ytcI PE=3 SV=1	1336	59573	37.59	IEHAEVK
68	1::sw|C0SPB0|YTCI_BACSU	Uncharacterized acyl--CoA ligase YtcI OS=Bacillus subtilis (strain 168) GN=ytcI PE=3 SV=1	1336	59573	30.79	IEHAEVK
68	1::sw|C0SPB0|YTCI_BACSU	Uncharacterized acyl--CoA ligase YtcI OS=Bacillus subtilis (strain 168) GN=ytcI PE=3 SV=1	1336	59573	26.28	IEHAEVK
68	1::sw|C0SPB0|YTCI_BACSU	Uncharacterized acyl--CoA ligase YtcI OS=Bacillus subtilis (strain 168) GN=ytcI PE=3 SV=1	1336	59573	33.25	LIVMVPR
68	1::sw|C0SPB0|YTCI_BACSU	Uncharacterized acyl--CoA ligase YtcI OS=Bacillus subtilis (strain 168) GN=ytcI PE=3 SV=1	1336	59573	41.85	LIVMVPR
68	1::sw|C0SPB0|YTCI_BACSU	Uncharacterized acyl--CoA ligase YtcI OS=Bacillus subtilis (strain 168) GN=ytcI PE=3 SV=1	1336	59573	19.62	RSDELVK
68	1::sw|C0SPB0|YTCI_BACSU	Uncharacterized acyl--CoA ligase YtcI OS=Bacillus subtilis (strain 168) GN=ytcI PE=3 SV=1	1336	59573	27.51	RSDELVK
68	1::sw|C0SPB0|YTCI_BACSU	Uncharacterized acyl--CoA ligase YtcI OS=Bacillus subtilis (strain 168) GN=ytcI PE=3 SV=1	1336	59573	33.47	LMEETNK
68	1::sw|C0SPB0|YTCI_BACSU	Uncharacterized acyl--CoA ligase YtcI OS=Bacillus subtilis (strain 168) GN=ytcI PE=3 SV=1	1336	59573	33.16	MLQNHVK
68	1::sw|C0SPB0|YTCI_BACSU	Uncharacterized acyl--CoA ligase YtcI OS=Bacillus subtilis (strain 168) GN=ytcI PE=3 SV=1	1336	59573	46.47	MLQNHVK
68	1::sw|C0SPB0|YTCI_BACSU	Uncharacterized acyl--CoA ligase YtcI OS=Bacillus subtilis (strain 168) GN=ytcI PE=3 SV=1	1336	59573	31.07	LMEETNK
68	1::sw|C0SPB0|YTCI_BACSU	Uncharacterized acyl--CoA ligase YtcI OS=Bacillus subtilis (strain 168) GN=ytcI PE=3 SV=1	1336	59573	29.1	MLQNHVK
68	1::sw|C0SPB0|YTCI_BACSU	Uncharacterized acyl--CoA ligase YtcI OS=Bacillus subtilis (strain 168) GN=ytcI PE=3 SV=1	1336	59573	20.19	AKDLEYR
68	1::sw|C0SPB0|YTCI_BACSU	Uncharacterized acyl--CoA ligase YtcI OS=Bacillus subtilis (strain 168) GN=ytcI PE=3 SV=1	1336	59573	35.65	YLELLNR
68	1::sw|C0SPB0|YTCI_BACSU	Uncharacterized acyl--CoA ligase YtcI OS=Bacillus subtilis (strain 168) GN=ytcI PE=3 SV=1	1336	59573	27.92	EVIDVFQK
68	1::sw|C0SPB0|YTCI_BACSU	Uncharacterized acyl--CoA ligase YtcI OS=Bacillus subtilis (strain 168) GN=ytcI PE=3 SV=1	1336	59573	47.42	EVIDVFQK
68	1::sw|C0SPB0|YTCI_BACSU	Uncharacterized acyl--CoA ligase YtcI OS=Bacillus subtilis (strain 168) GN=ytcI PE=3 SV=1	1336	59573	47.03	GDYFLTGDR
68	1::sw|C0SPB0|YTCI_BACSU	Uncharacterized acyl--CoA ligase YtcI OS=Bacillus subtilis (strain 168) GN=ytcI PE=3 SV=1	1336	59573	78.99	IGAALADLGFK
68	1::sw|C0SPB0|YTCI_BACSU	Uncharacterized acyl--CoA ligase YtcI OS=Bacillus subtilis (strain 168) GN=ytcI PE=3 SV=1	1336	59573	73.26	IGAALADLGFK
68	1::sw|C0SPB0|YTCI_BACSU	Uncharacterized acyl--CoA ligase YtcI OS=Bacillus subtilis (strain 168) GN=ytcI PE=3 SV=1	1336	59573	54.67	IGAALADLGFK
68	1::sw|C0SPB0|YTCI_BACSU	Uncharacterized acyl--CoA ligase YtcI OS=Bacillus subtilis (strain 168) GN=ytcI PE=3 SV=1	1336	59573	53.94	IGAALADLGFK
68	1::sw|C0SPB0|YTCI_BACSU	Uncharacterized acyl--CoA ligase YtcI OS=Bacillus subtilis (strain 168) GN=ytcI PE=3 SV=1	1336	59573	72.59	IGAALADLGFK
68	1::sw|C0SPB0|YTCI_BACSU	Uncharacterized acyl--CoA ligase YtcI OS=Bacillus subtilis (strain 168) GN=ytcI PE=3 SV=1	1336	59573	21.59	EYFKDPER
68	1::sw|C0SPB0|YTCI_BACSU	Uncharacterized acyl--CoA ligase YtcI OS=Bacillus subtilis (strain 168) GN=ytcI PE=3 SV=1	1336	59573	24.11	EYFKDPER
68	1::sw|C0SPB0|YTCI_BACSU	Uncharacterized acyl--CoA ligase YtcI OS=Bacillus subtilis (strain 168) GN=ytcI PE=3 SV=1	1336	59573	29.35	EYFKDPER
68	1::sw|C0SPB0|YTCI_BACSU	Uncharacterized acyl--CoA ligase YtcI OS=Bacillus subtilis (strain 168) GN=ytcI PE=3 SV=1	1336	59573	19.94	EYFKDPER
68	1::sw|C0SPB0|YTCI_BACSU	Uncharacterized acyl--CoA ligase YtcI OS=Bacillus subtilis (strain 168) GN=ytcI PE=3 SV=1	1336	59573	27.15	DTPIKPGSMGK
68	1::sw|C0SPB0|YTCI_BACSU	Uncharacterized acyl--CoA ligase YtcI OS=Bacillus subtilis (strain 168) GN=ytcI PE=3 SV=1	1336	59573	30.25	DTPIKPGSMGK
68	1::sw|C0SPB0|YTCI_BACSU	Uncharacterized acyl--CoA ligase YtcI OS=Bacillus subtilis (strain 168) GN=ytcI PE=3 SV=1	1336	59573	44.77	EIEFVESLPK
68	1::sw|C0SPB0|YTCI_BACSU	Uncharacterized acyl--CoA ligase YtcI OS=Bacillus subtilis (strain 168) GN=ytcI PE=3 SV=1	1336	59573	37.62	EIEFVESLPK
68	1::sw|C0SPB0|YTCI_BACSU	Uncharacterized acyl--CoA ligase YtcI OS=Bacillus subtilis (strain 168) GN=ytcI PE=3 SV=1	1336	59573	30.99	AYVVLQNHEK
68	1::sw|C0SPB0|YTCI_BACSU	Uncharacterized acyl--CoA ligase YtcI OS=Bacillus subtilis (strain 168) GN=ytcI PE=3 SV=1	1336	59573	27.67	AYVVLQNHEK
68	1::sw|C0SPB0|YTCI_BACSU	Uncharacterized acyl--CoA ligase YtcI OS=Bacillus subtilis (strain 168) GN=ytcI PE=3 SV=1	1336	59573	37.57	AYVVLQNHEK
68	1::sw|C0SPB0|YTCI_BACSU	Uncharacterized acyl--CoA ligase YtcI OS=Bacillus subtilis (strain 168) GN=ytcI PE=3 SV=1	1336	59573	44.22	AYVVLQNHEK
68	1::sw|C0SPB0|YTCI_BACSU	Uncharacterized acyl--CoA ligase YtcI OS=Bacillus subtilis (strain 168) GN=ytcI PE=3 SV=1	1336	59573	49.54	AYVVLQNHEK
68	1::sw|C0SPB0|YTCI_BACSU	Uncharacterized acyl--CoA ligase YtcI OS=Bacillus subtilis (strain 168) GN=ytcI PE=3 SV=1	1336	59573	24.65	TALLWEDESGK
68	1::sw|C0SPB0|YTCI_BACSU	Uncharacterized acyl--CoA ligase YtcI OS=Bacillus subtilis (strain 168) GN=ytcI PE=3 SV=1	1336	59573	48.35	TSAGAWLDISEK
68	1::sw|C0SPB0|YTCI_BACSU	Uncharacterized acyl--CoA ligase YtcI OS=Bacillus subtilis (strain 168) GN=ytcI PE=3 SV=1	1336	59573	88.94	TSAGAWLDISEK
68	1::sw|C0SPB0|YTCI_BACSU	Uncharacterized acyl--CoA ligase YtcI OS=Bacillus subtilis (strain 168) GN=ytcI PE=3 SV=1	1336	59573	48.75	ECAVVASPDEIR
68	1::sw|C0SPB0|YTCI_BACSU	Uncharacterized acyl--CoA ligase YtcI OS=Bacillus subtilis (strain 168) GN=ytcI PE=3 SV=1	1336	59573	46.68	ECAVVASPDEIR
68	1::sw|C0SPB0|YTCI_BACSU	Uncharacterized acyl--CoA ligase YtcI OS=Bacillus subtilis (strain 168) GN=ytcI PE=3 SV=1	1336	59573	93.32	NLLSIEADGSQFK
68	1::sw|C0SPB0|YTCI_BACSU	Uncharacterized acyl--CoA ligase YtcI OS=Bacillus subtilis (strain 168) GN=ytcI PE=3 SV=1	1336	59573	96.21	NLLSIEADGSQFK
68	1::sw|C0SPB0|YTCI_BACSU	Uncharacterized acyl--CoA ligase YtcI OS=Bacillus subtilis (strain 168) GN=ytcI PE=3 SV=1	1336	59573	83.76	GAIVYSEFIGAFR
68	1::sw|C0SPB0|YTCI_BACSU	Uncharacterized acyl--CoA ligase YtcI OS=Bacillus subtilis (strain 168) GN=ytcI PE=3 SV=1	1336	59573	50.37	GAIVYSEFIGAFR
68	1::sw|C0SPB0|YTCI_BACSU	Uncharacterized acyl--CoA ligase YtcI OS=Bacillus subtilis (strain 168) GN=ytcI PE=3 SV=1	1336	59573	87.41	GAIVYSEFIGAFR
68	1::sw|C0SPB0|YTCI_BACSU	Uncharacterized acyl--CoA ligase YtcI OS=Bacillus subtilis (strain 168) GN=ytcI PE=3 SV=1	1336	59573	27.51	GAIVYSEFIGAFR
68	1::sw|C0SPB0|YTCI_BACSU	Uncharacterized acyl--CoA ligase YtcI OS=Bacillus subtilis (strain 168) GN=ytcI PE=3 SV=1	1336	59573	77.26	VLEAYAVYLAILK
68	1::sw|C0SPB0|YTCI_BACSU	Uncharacterized acyl--CoA ligase YtcI OS=Bacillus subtilis (strain 168) GN=ytcI PE=3 SV=1	1336	59573	85.28	VLEAYAVYLAILK
68	1::sw|C0SPB0|YTCI_BACSU	Uncharacterized acyl--CoA ligase YtcI OS=Bacillus subtilis (strain 168) GN=ytcI PE=3 SV=1	1336	59573	62.77	LITLSIGENDAGWK
68	1::sw|C0SPB0|YTCI_BACSU	Uncharacterized acyl--CoA ligase YtcI OS=Bacillus subtilis (strain 168) GN=ytcI PE=3 SV=1	1336	59573	22.49	LITLSIGENDAGWK
68	1::sw|C0SPB0|YTCI_BACSU	Uncharacterized acyl--CoA ligase YtcI OS=Bacillus subtilis (strain 168) GN=ytcI PE=3 SV=1	1336	59573	27.58	INVFCCTPTEYR
68	1::sw|C0SPB0|YTCI_BACSU	Uncharacterized acyl--CoA ligase YtcI OS=Bacillus subtilis (strain 168) GN=ytcI PE=3 SV=1	1336	59573	26.16	GVVHTHGWAFAHLK
68	1::sw|C0SPB0|YTCI_BACSU	Uncharacterized acyl--CoA ligase YtcI OS=Bacillus subtilis (strain 168) GN=ytcI PE=3 SV=1	1336	59573	29.64	GVVHTHGWAFAHLK
68	1::sw|C0SPB0|YTCI_BACSU	Uncharacterized acyl--CoA ligase YtcI OS=Bacillus subtilis (strain 168) GN=ytcI PE=3 SV=1	1336	59573	19.21	KDEEGYFWFESR
68	1::sw|C0SPB0|YTCI_BACSU	Uncharacterized acyl--CoA ligase YtcI OS=Bacillus subtilis (strain 168) GN=ytcI PE=3 SV=1	1336	59573	20.73	KDEEGYFWFESR
68	1::sw|C0SPB0|YTCI_BACSU	Uncharacterized acyl--CoA ligase YtcI OS=Bacillus subtilis (strain 168) GN=ytcI PE=3 SV=1	1336	59573	57.07	DGYGQTESTLLVGVLK
68	1::sw|C0SPB0|YTCI_BACSU	Uncharacterized acyl--CoA ligase YtcI OS=Bacillus subtilis (strain 168) GN=ytcI PE=3 SV=1	1336	59573	58.66	DGYGQTESTLLVGVLK
68	1::sw|C0SPB0|YTCI_BACSU	Uncharacterized acyl--CoA ligase YtcI OS=Bacillus subtilis (strain 168) GN=ytcI PE=3 SV=1	1336	59573	35	FDLSALHSAVSAGEPLNR
68	1::sw|C0SPB0|YTCI_BACSU	Uncharacterized acyl--CoA ligase YtcI OS=Bacillus subtilis (strain 168) GN=ytcI PE=3 SV=1	1336	59573	38.07	FDLSALHSAVSAGEPLNR
68	1::sw|C0SPB0|YTCI_BACSU	Uncharacterized acyl--CoA ligase YtcI OS=Bacillus subtilis (strain 168) GN=ytcI PE=3 SV=1	1336	59573	32.98	EDLIAPVQYNLVNEMEK
485	1::sw|C0SPB1|YUKJ_BACSU	Uncharacterized protein YukJ OS=Bacillus subtilis (strain 168) GN=yukJ PE=4 SV=1	131	25709	26.96	GNLFDPR
485	1::sw|C0SPB1|YUKJ_BACSU	Uncharacterized protein YukJ OS=Bacillus subtilis (strain 168) GN=yukJ PE=4 SV=1	131	25709	25.68	FGPEQAADK
485	1::sw|C0SPB1|YUKJ_BACSU	Uncharacterized protein YukJ OS=Bacillus subtilis (strain 168) GN=yukJ PE=4 SV=1	131	25709	33.4	FGPEQAADK
485	1::sw|C0SPB1|YUKJ_BACSU	Uncharacterized protein YukJ OS=Bacillus subtilis (strain 168) GN=yukJ PE=4 SV=1	131	25709	24.35	AVQQYGVLK
485	1::sw|C0SPB1|YUKJ_BACSU	Uncharacterized protein YukJ OS=Bacillus subtilis (strain 168) GN=yukJ PE=4 SV=1	131	25709	56.96	MLGEENTYYR
485	1::sw|C0SPB1|YUKJ_BACSU	Uncharacterized protein YukJ OS=Bacillus subtilis (strain 168) GN=yukJ PE=4 SV=1	131	25709	46.58	MLGEENTYYR
485	1::sw|C0SPB1|YUKJ_BACSU	Uncharacterized protein YukJ OS=Bacillus subtilis (strain 168) GN=yukJ PE=4 SV=1	131	25709	51.5	ETDDDSPHFQVK
902	1::sw|C0SPB4|YHAQ_BACSU	Uncharacterized ABC transporter ATP-binding protein YhaQ OS=Bacillus subtilis (strain 168) GN=yhaQ PE=3 SV=1	34	33951	20.08	KVEELSK
902	1::sw|C0SPB4|YHAQ_BACSU	Uncharacterized ABC transporter ATP-binding protein YhaQ OS=Bacillus subtilis (strain 168) GN=yhaQ PE=3 SV=1	34	33951	32.97	FNITDYENK
902	1::sw|C0SPB4|YHAQ_BACSU	Uncharacterized ABC transporter ATP-binding protein YhaQ OS=Bacillus subtilis (strain 168) GN=yhaQ PE=3 SV=1	34	33951	26.23	NVTIHSDDDLR
902	1::sw|C0SPB4|YHAQ_BACSU	Uncharacterized ABC transporter ATP-binding protein YhaQ OS=Bacillus subtilis (strain 168) GN=yhaQ PE=3 SV=1	34	33951	19.38	FLQSHEGILQWK
946	1::sw|C0SPB9|YKON_BACSU	Uncharacterized glycosyltransferase YkoN OS=Bacillus subtilis (strain 168) GN=ykoN PE=3 SV=1	29	43778	29.06	WVQELSPGGK
367	1::sw|O05235|YUGF_BACSU	Uncharacterized hydrolase YugF OS=Bacillus subtilis (strain 168) GN=yugF PE=3 SV=1	201	31420	38.61	NLLNVVHDK
367	1::sw|O05235|YUGF_BACSU	Uncharacterized hydrolase YugF OS=Bacillus subtilis (strain 168) GN=yugF PE=3 SV=1	201	31420	40.78	NLLNVVHDK
367	1::sw|O05235|YUGF_BACSU	Uncharacterized hydrolase YugF OS=Bacillus subtilis (strain 168) GN=yugF PE=3 SV=1	201	31420	38.06	NLLNVVHDK
367	1::sw|O05235|YUGF_BACSU	Uncharacterized hydrolase YugF OS=Bacillus subtilis (strain 168) GN=yugF PE=3 SV=1	201	31420	34.97	VVLLCSSGYLK
367	1::sw|O05235|YUGF_BACSU	Uncharacterized hydrolase YugF OS=Bacillus subtilis (strain 168) GN=yugF PE=3 SV=1	201	31420	33.87	TFIYTYQNLAK
367	1::sw|O05235|YUGF_BACSU	Uncharacterized hydrolase YugF OS=Bacillus subtilis (strain 168) GN=yugF PE=3 SV=1	201	31420	32.48	TFIYTYQNLAK
367	1::sw|O05235|YUGF_BACSU	Uncharacterized hydrolase YugF OS=Bacillus subtilis (strain 168) GN=yugF PE=3 SV=1	201	31420	46.79	LVIGILEHLQVK
367	1::sw|O05235|YUGF_BACSU	Uncharacterized hydrolase YugF OS=Bacillus subtilis (strain 168) GN=yugF PE=3 SV=1	201	31420	78.45	LVIGILEHLQVK
40	1::sw|O05239|YUGJ_BACSU	Probable NADH-dependent butanol dehydrogenase 1 OS=Bacillus subtilis (strain 168) GN=yugJ PE=3 SV=1	1861	42877	29.59	TVIETAPK
40	1::sw|O05239|YUGJ_BACSU	Probable NADH-dependent butanol dehydrogenase 1 OS=Bacillus subtilis (strain 168) GN=yugJ PE=3 SV=1	1861	42877	51.51	TVIETAPK
40	1::sw|O05239|YUGJ_BACSU	Probable NADH-dependent butanol dehydrogenase 1 OS=Bacillus subtilis (strain 168) GN=yugJ PE=3 SV=1	1861	42877	43.23	MCESLLR
40	1::sw|O05239|YUGJ_BACSU	Probable NADH-dependent butanol dehydrogenase 1 OS=Bacillus subtilis (strain 168) GN=yugJ PE=3 SV=1	1861	42877	53.63	MCESLLR
40	1::sw|O05239|YUGJ_BACSU	Probable NADH-dependent butanol dehydrogenase 1 OS=Bacillus subtilis (strain 168) GN=yugJ PE=3 SV=1	1861	42877	36.36	MCESLLR
40	1::sw|O05239|YUGJ_BACSU	Probable NADH-dependent butanol dehydrogenase 1 OS=Bacillus subtilis (strain 168) GN=yugJ PE=3 SV=1	1861	42877	30.28	MCESLLR
40	1::sw|O05239|YUGJ_BACSU	Probable NADH-dependent butanol dehydrogenase 1 OS=Bacillus subtilis (strain 168) GN=yugJ PE=3 SV=1	1861	42877	29.35	EDVLSILK
40	1::sw|O05239|YUGJ_BACSU	Probable NADH-dependent butanol dehydrogenase 1 OS=Bacillus subtilis (strain 168) GN=yugJ PE=3 SV=1	1861	42877	28.08	MCESLLR
40	1::sw|O05239|YUGJ_BACSU	Probable NADH-dependent butanol dehydrogenase 1 OS=Bacillus subtilis (strain 168) GN=yugJ PE=3 SV=1	1861	42877	55.08	VFDVEEAGK
40	1::sw|O05239|YUGJ_BACSU	Probable NADH-dependent butanol dehydrogenase 1 OS=Bacillus subtilis (strain 168) GN=yugJ PE=3 SV=1	1861	42877	58.33	HTLSENPAR
40	1::sw|O05239|YUGJ_BACSU	Probable NADH-dependent butanol dehydrogenase 1 OS=Bacillus subtilis (strain 168) GN=yugJ PE=3 SV=1	1861	42877	58.51	HTLSENPAR
40	1::sw|O05239|YUGJ_BACSU	Probable NADH-dependent butanol dehydrogenase 1 OS=Bacillus subtilis (strain 168) GN=yugJ PE=3 SV=1	1861	42877	54.61	HTLSENPAR
40	1::sw|O05239|YUGJ_BACSU	Probable NADH-dependent butanol dehydrogenase 1 OS=Bacillus subtilis (strain 168) GN=yugJ PE=3 SV=1	1861	42877	43.12	HTLSENPAR
40	1::sw|O05239|YUGJ_BACSU	Probable NADH-dependent butanol dehydrogenase 1 OS=Bacillus subtilis (strain 168) GN=yugJ PE=3 SV=1	1861	42877	55.73	HTLSENPAR
40	1::sw|O05239|YUGJ_BACSU	Probable NADH-dependent butanol dehydrogenase 1 OS=Bacillus subtilis (strain 168) GN=yugJ PE=3 SV=1	1861	42877	56.04	HTLSENPAR
40	1::sw|O05239|YUGJ_BACSU	Probable NADH-dependent butanol dehydrogenase 1 OS=Bacillus subtilis (strain 168) GN=yugJ PE=3 SV=1	1861	42877	20.52	HTLSENPAR
40	1::sw|O05239|YUGJ_BACSU	Probable NADH-dependent butanol dehydrogenase 1 OS=Bacillus subtilis (strain 168) GN=yugJ PE=3 SV=1	1861	42877	56.17	HTLSENPAR
40	1::sw|O05239|YUGJ_BACSU	Probable NADH-dependent butanol dehydrogenase 1 OS=Bacillus subtilis (strain 168) GN=yugJ PE=3 SV=1	1861	42877	26.39	AMANGTFGQFK
40	1::sw|O05239|YUGJ_BACSU	Probable NADH-dependent butanol dehydrogenase 1 OS=Bacillus subtilis (strain 168) GN=yugJ PE=3 SV=1	1861	42877	51.77	LPEELKPYGK
40	1::sw|O05239|YUGJ_BACSU	Probable NADH-dependent butanol dehydrogenase 1 OS=Bacillus subtilis (strain 168) GN=yugJ PE=3 SV=1	1861	42877	53.06	LPEELKPYGK
40	1::sw|O05239|YUGJ_BACSU	Probable NADH-dependent butanol dehydrogenase 1 OS=Bacillus subtilis (strain 168) GN=yugJ PE=3 SV=1	1861	42877	49.72	LPEELKPYGK
40	1::sw|O05239|YUGJ_BACSU	Probable NADH-dependent butanol dehydrogenase 1 OS=Bacillus subtilis (strain 168) GN=yugJ PE=3 SV=1	1861	42877	37.49	LPEELKPYGK
40	1::sw|O05239|YUGJ_BACSU	Probable NADH-dependent butanol dehydrogenase 1 OS=Bacillus subtilis (strain 168) GN=yugJ PE=3 SV=1	1861	42877	61.87	NVLLVYGGGSIK
40	1::sw|O05239|YUGJ_BACSU	Probable NADH-dependent butanol dehydrogenase 1 OS=Bacillus subtilis (strain 168) GN=yugJ PE=3 SV=1	1861	42877	46.03	NVLLVYGGGSIK
40	1::sw|O05239|YUGJ_BACSU	Probable NADH-dependent butanol dehydrogenase 1 OS=Bacillus subtilis (strain 168) GN=yugJ PE=3 SV=1	1861	42877	65.27	NVLLVYGGGSIK
40	1::sw|O05239|YUGJ_BACSU	Probable NADH-dependent butanol dehydrogenase 1 OS=Bacillus subtilis (strain 168) GN=yugJ PE=3 SV=1	1861	42877	75.4	NVLLVYGGGSIK
40	1::sw|O05239|YUGJ_BACSU	Probable NADH-dependent butanol dehydrogenase 1 OS=Bacillus subtilis (strain 168) GN=yugJ PE=3 SV=1	1861	42877	70.07	NVLLVYGGGSIK
40	1::sw|O05239|YUGJ_BACSU	Probable NADH-dependent butanol dehydrogenase 1 OS=Bacillus subtilis (strain 168) GN=yugJ PE=3 SV=1	1861	42877	28.93	YGWGSPLVFPK
40	1::sw|O05239|YUGJ_BACSU	Probable NADH-dependent butanol dehydrogenase 1 OS=Bacillus subtilis (strain 168) GN=yugJ PE=3 SV=1	1861	42877	44.52	YGWGSPLVFPK
40	1::sw|O05239|YUGJ_BACSU	Probable NADH-dependent butanol dehydrogenase 1 OS=Bacillus subtilis (strain 168) GN=yugJ PE=3 SV=1	1861	42877	46.82	YGWGSPLVFPK
40	1::sw|O05239|YUGJ_BACSU	Probable NADH-dependent butanol dehydrogenase 1 OS=Bacillus subtilis (strain 168) GN=yugJ PE=3 SV=1	1861	42877	36.85	YGWGSPLVFPK
40	1::sw|O05239|YUGJ_BACSU	Probable NADH-dependent butanol dehydrogenase 1 OS=Bacillus subtilis (strain 168) GN=yugJ PE=3 SV=1	1861	42877	79.64	YDGDAWDIVTK
40	1::sw|O05239|YUGJ_BACSU	Probable NADH-dependent butanol dehydrogenase 1 OS=Bacillus subtilis (strain 168) GN=yugJ PE=3 SV=1	1861	42877	20.38	YDGDAWDIVTK
40	1::sw|O05239|YUGJ_BACSU	Probable NADH-dependent butanol dehydrogenase 1 OS=Bacillus subtilis (strain 168) GN=yugJ PE=3 SV=1	1861	42877	100.34	TDEEIALEGIDK
40	1::sw|O05239|YUGJ_BACSU	Probable NADH-dependent butanol dehydrogenase 1 OS=Bacillus subtilis (strain 168) GN=yugJ PE=3 SV=1	1861	42877	74.92	SLNKEDVLSILK
40	1::sw|O05239|YUGJ_BACSU	Probable NADH-dependent butanol dehydrogenase 1 OS=Bacillus subtilis (strain 168) GN=yugJ PE=3 SV=1	1861	42877	38.9	SLNKEDVLSILK
40	1::sw|O05239|YUGJ_BACSU	Probable NADH-dependent butanol dehydrogenase 1 OS=Bacillus subtilis (strain 168) GN=yugJ PE=3 SV=1	1861	42877	23.37	LINDLENYELR
40	1::sw|O05239|YUGJ_BACSU	Probable NADH-dependent butanol dehydrogenase 1 OS=Bacillus subtilis (strain 168) GN=yugJ PE=3 SV=1	1861	42877	42.03	LINDLENYELR
40	1::sw|O05239|YUGJ_BACSU	Probable NADH-dependent butanol dehydrogenase 1 OS=Bacillus subtilis (strain 168) GN=yugJ PE=3 SV=1	1861	42877	52.42	LINDLENYELR
40	1::sw|O05239|YUGJ_BACSU	Probable NADH-dependent butanol dehydrogenase 1 OS=Bacillus subtilis (strain 168) GN=yugJ PE=3 SV=1	1861	42877	58.15	LINDLENYELR
40	1::sw|O05239|YUGJ_BACSU	Probable NADH-dependent butanol dehydrogenase 1 OS=Bacillus subtilis (strain 168) GN=yugJ PE=3 SV=1	1861	42877	59.08	LSAFWTSLGAPNR
40	1::sw|O05239|YUGJ_BACSU	Probable NADH-dependent butanol dehydrogenase 1 OS=Bacillus subtilis (strain 168) GN=yugJ PE=3 SV=1	1861	42877	67.67	LSAFWTSLGAPNR
40	1::sw|O05239|YUGJ_BACSU	Probable NADH-dependent butanol dehydrogenase 1 OS=Bacillus subtilis (strain 168) GN=yugJ PE=3 SV=1	1861	42877	27.86	LSAFWTSLGAPNR
40	1::sw|O05239|YUGJ_BACSU	Probable NADH-dependent butanol dehydrogenase 1 OS=Bacillus subtilis (strain 168) GN=yugJ PE=3 SV=1	1861	42877	24.32	LSAFWTSLGAPNR
40	1::sw|O05239|YUGJ_BACSU	Probable NADH-dependent butanol dehydrogenase 1 OS=Bacillus subtilis (strain 168) GN=yugJ PE=3 SV=1	1861	42877	54.45	MQNFTYWNPTK
40	1::sw|O05239|YUGJ_BACSU	Probable NADH-dependent butanol dehydrogenase 1 OS=Bacillus subtilis (strain 168) GN=yugJ PE=3 SV=1	1861	42877	77.46	MQNFTYWNPTK
40	1::sw|O05239|YUGJ_BACSU	Probable NADH-dependent butanol dehydrogenase 1 OS=Bacillus subtilis (strain 168) GN=yugJ PE=3 SV=1	1861	42877	53.21	MQNFTYWNPTK
40	1::sw|O05239|YUGJ_BACSU	Probable NADH-dependent butanol dehydrogenase 1 OS=Bacillus subtilis (strain 168) GN=yugJ PE=3 SV=1	1861	42877	25.97	SGLYDQVIEQLNK
40	1::sw|O05239|YUGJ_BACSU	Probable NADH-dependent butanol dehydrogenase 1 OS=Bacillus subtilis (strain 168) GN=yugJ PE=3 SV=1	1861	42877	52.51	SGLYDQVIEQLNK
40	1::sw|O05239|YUGJ_BACSU	Probable NADH-dependent butanol dehydrogenase 1 OS=Bacillus subtilis (strain 168) GN=yugJ PE=3 SV=1	1861	42877	71.02	SGLYDQVIEQLNK
40	1::sw|O05239|YUGJ_BACSU	Probable NADH-dependent butanol dehydrogenase 1 OS=Bacillus subtilis (strain 168) GN=yugJ PE=3 SV=1	1861	42877	50.96	FSILDPVNTFTVPK
40	1::sw|O05239|YUGJ_BACSU	Probable NADH-dependent butanol dehydrogenase 1 OS=Bacillus subtilis (strain 168) GN=yugJ PE=3 SV=1	1861	42877	30.25	FSILDPVNTFTVPK
40	1::sw|O05239|YUGJ_BACSU	Probable NADH-dependent butanol dehydrogenase 1 OS=Bacillus subtilis (strain 168) GN=yugJ PE=3 SV=1	1861	42877	23.86	FSILDPVNTFTVPK
40	1::sw|O05239|YUGJ_BACSU	Probable NADH-dependent butanol dehydrogenase 1 OS=Bacillus subtilis (strain 168) GN=yugJ PE=3 SV=1	1861	42877	24.29	FSILDPVNTFTVPK
40	1::sw|O05239|YUGJ_BACSU	Probable NADH-dependent butanol dehydrogenase 1 OS=Bacillus subtilis (strain 168) GN=yugJ PE=3 SV=1	1861	42877	18.05	FSILDPVNTFTVPK
40	1::sw|O05239|YUGJ_BACSU	Probable NADH-dependent butanol dehydrogenase 1 OS=Bacillus subtilis (strain 168) GN=yugJ PE=3 SV=1	1861	42877	71.15	FSILDPVNTFTVPK
40	1::sw|O05239|YUGJ_BACSU	Probable NADH-dependent butanol dehydrogenase 1 OS=Bacillus subtilis (strain 168) GN=yugJ PE=3 SV=1	1861	42877	78.14	AGATVHELAGVEPNPR
40	1::sw|O05239|YUGJ_BACSU	Probable NADH-dependent butanol dehydrogenase 1 OS=Bacillus subtilis (strain 168) GN=yugJ PE=3 SV=1	1861	42877	69.47	AGATVHELAGVEPNPR
40	1::sw|O05239|YUGJ_BACSU	Probable NADH-dependent butanol dehydrogenase 1 OS=Bacillus subtilis (strain 168) GN=yugJ PE=3 SV=1	1861	42877	85.52	AGATVHELAGVEPNPR
40	1::sw|O05239|YUGJ_BACSU	Probable NADH-dependent butanol dehydrogenase 1 OS=Bacillus subtilis (strain 168) GN=yugJ PE=3 SV=1	1861	42877	85.61	AGATVHELAGVEPNPR
40	1::sw|O05239|YUGJ_BACSU	Probable NADH-dependent butanol dehydrogenase 1 OS=Bacillus subtilis (strain 168) GN=yugJ PE=3 SV=1	1861	42877	35.47	AGATVHELAGVEPNPR
40	1::sw|O05239|YUGJ_BACSU	Probable NADH-dependent butanol dehydrogenase 1 OS=Bacillus subtilis (strain 168) GN=yugJ PE=3 SV=1	1861	42877	37.59	AGATVHELAGVEPNPR
40	1::sw|O05239|YUGJ_BACSU	Probable NADH-dependent butanol dehydrogenase 1 OS=Bacillus subtilis (strain 168) GN=yugJ PE=3 SV=1	1861	42877	19.58	AGATVHELAGVEPNPR
40	1::sw|O05239|YUGJ_BACSU	Probable NADH-dependent butanol dehydrogenase 1 OS=Bacillus subtilis (strain 168) GN=yugJ PE=3 SV=1	1861	42877	40.71	AGATVHELAGVEPNPR
40	1::sw|O05239|YUGJ_BACSU	Probable NADH-dependent butanol dehydrogenase 1 OS=Bacillus subtilis (strain 168) GN=yugJ PE=3 SV=1	1861	42877	30.38	RSGLYDQVIEQLNK
40	1::sw|O05239|YUGJ_BACSU	Probable NADH-dependent butanol dehydrogenase 1 OS=Bacillus subtilis (strain 168) GN=yugJ PE=3 SV=1	1861	42877	87.13	LADYDINDEQLDTIADK
40	1::sw|O05239|YUGJ_BACSU	Probable NADH-dependent butanol dehydrogenase 1 OS=Bacillus subtilis (strain 168) GN=yugJ PE=3 SV=1	1861	42877	20.12	EQNIDFLLAVGGGSVIDCTK
40	1::sw|O05239|YUGJ_BACSU	Probable NADH-dependent butanol dehydrogenase 1 OS=Bacillus subtilis (strain 168) GN=yugJ PE=3 SV=1	1861	42877	45.62	VFDVEEAGKTDEEIALEGIDK
165	1::sw|O05240|YUGK_BACSU	Probable NADH-dependent butanol dehydrogenase 2 OS=Bacillus subtilis (strain 168) GN=yugK PE=3 SV=1	599	43550	21.69	GQLEQLR
165	1::sw|O05240|YUGK_BACSU	Probable NADH-dependent butanol dehydrogenase 2 OS=Bacillus subtilis (strain 168) GN=yugK PE=3 SV=1	599	43550	25.9	GQLEQLR
165	1::sw|O05240|YUGK_BACSU	Probable NADH-dependent butanol dehydrogenase 2 OS=Bacillus subtilis (strain 168) GN=yugK PE=3 SV=1	599	43550	61.31	YTLDTNVGR
165	1::sw|O05240|YUGK_BACSU	Probable NADH-dependent butanol dehydrogenase 2 OS=Bacillus subtilis (strain 168) GN=yugK PE=3 SV=1	599	43550	40.37	LADYNIGEEK
165	1::sw|O05240|YUGK_BACSU	Probable NADH-dependent butanol dehydrogenase 2 OS=Bacillus subtilis (strain 168) GN=yugK PE=3 SV=1	599	43550	61.87	NVLLVYGGGSIK
165	1::sw|O05240|YUGK_BACSU	Probable NADH-dependent butanol dehydrogenase 2 OS=Bacillus subtilis (strain 168) GN=yugK PE=3 SV=1	599	43550	46.03	NVLLVYGGGSIK
165	1::sw|O05240|YUGK_BACSU	Probable NADH-dependent butanol dehydrogenase 2 OS=Bacillus subtilis (strain 168) GN=yugK PE=3 SV=1	599	43550	65.27	NVLLVYGGGSIK
165	1::sw|O05240|YUGK_BACSU	Probable NADH-dependent butanol dehydrogenase 2 OS=Bacillus subtilis (strain 168) GN=yugK PE=3 SV=1	599	43550	75.4	NVLLVYGGGSIK
165	1::sw|O05240|YUGK_BACSU	Probable NADH-dependent butanol dehydrogenase 2 OS=Bacillus subtilis (strain 168) GN=yugK PE=3 SV=1	599	43550	70.07	NVLLVYGGGSIK
165	1::sw|O05240|YUGK_BACSU	Probable NADH-dependent butanol dehydrogenase 2 OS=Bacillus subtilis (strain 168) GN=yugK PE=3 SV=1	599	43550	43.05	FVWGSNVTHPR
165	1::sw|O05240|YUGK_BACSU	Probable NADH-dependent butanol dehydrogenase 2 OS=Bacillus subtilis (strain 168) GN=yugK PE=3 SV=1	599	43550	56.94	FVWGSNVTHPR
165	1::sw|O05240|YUGK_BACSU	Probable NADH-dependent butanol dehydrogenase 2 OS=Bacillus subtilis (strain 168) GN=yugK PE=3 SV=1	599	43550	54.43	YDGDAWDIFSK
165	1::sw|O05240|YUGK_BACSU	Probable NADH-dependent butanol dehydrogenase 2 OS=Bacillus subtilis (strain 168) GN=yugK PE=3 SV=1	599	43550	50.76	TDKEIALEGIDK
165	1::sw|O05240|YUGK_BACSU	Probable NADH-dependent butanol dehydrogenase 2 OS=Bacillus subtilis (strain 168) GN=yugK PE=3 SV=1	599	43550	50.32	TDKEIALEGIDK
165	1::sw|O05240|YUGK_BACSU	Probable NADH-dependent butanol dehydrogenase 2 OS=Bacillus subtilis (strain 168) GN=yugK PE=3 SV=1	599	43550	64.81	LSAFWTSLGAPSR
165	1::sw|O05240|YUGK_BACSU	Probable NADH-dependent butanol dehydrogenase 2 OS=Bacillus subtilis (strain 168) GN=yugK PE=3 SV=1	599	43550	81.13	LLEDLENYELR
165	1::sw|O05240|YUGK_BACSU	Probable NADH-dependent butanol dehydrogenase 2 OS=Bacillus subtilis (strain 168) GN=yugK PE=3 SV=1	599	43550	87.34	MCFAVLQTVIETAPK
165	1::sw|O05240|YUGK_BACSU	Probable NADH-dependent butanol dehydrogenase 2 OS=Bacillus subtilis (strain 168) GN=yugK PE=3 SV=1	599	43550	20.67	EEGAVVHELSGVEPNPR
315	1::sw|O05241|YUGS_BACSU	UPF0053 protein YugS OS=Bacillus subtilis (strain 168) GN=yugS PE=3 SV=2	268	48985	20.47	ITYPFIK
315	1::sw|O05241|YUGS_BACSU	UPF0053 protein YugS OS=Bacillus subtilis (strain 168) GN=yugS PE=3 SV=2	268	48985	22.99	LFGFHSVK
315	1::sw|O05241|YUGS_BACSU	UPF0053 protein YugS OS=Bacillus subtilis (strain 168) GN=yugS PE=3 SV=2	268	48985	38.56	IFEFDNR
315	1::sw|O05241|YUGS_BACSU	UPF0053 protein YugS OS=Bacillus subtilis (strain 168) GN=yugS PE=3 SV=2	268	48985	47.86	AYFLGQPIK
315	1::sw|O05241|YUGS_BACSU	UPF0053 protein YugS OS=Bacillus subtilis (strain 168) GN=yugS PE=3 SV=2	268	48985	20.89	GEINQSEFR
315	1::sw|O05241|YUGS_BACSU	UPF0053 protein YugS OS=Bacillus subtilis (strain 168) GN=yugS PE=3 SV=2	268	48985	28.33	GEINQSEFR
315	1::sw|O05241|YUGS_BACSU	UPF0053 protein YugS OS=Bacillus subtilis (strain 168) GN=yugS PE=3 SV=2	268	48985	20.53	LILSESYEK
315	1::sw|O05241|YUGS_BACSU	UPF0053 protein YugS OS=Bacillus subtilis (strain 168) GN=yugS PE=3 SV=2	268	48985	32.49	ILDAEDHHIR
315	1::sw|O05241|YUGS_BACSU	UPF0053 protein YugS OS=Bacillus subtilis (strain 168) GN=yugS PE=3 SV=2	268	48985	33.33	ILDAEDHHIR
315	1::sw|O05241|YUGS_BACSU	UPF0053 protein YugS OS=Bacillus subtilis (strain 168) GN=yugS PE=3 SV=2	268	48985	59.9	INQLIESGDSR
315	1::sw|O05241|YUGS_BACSU	UPF0053 protein YugS OS=Bacillus subtilis (strain 168) GN=yugS PE=3 SV=2	268	48985	62.15	INQLIESGDSR
315	1::sw|O05241|YUGS_BACSU	UPF0053 protein YugS OS=Bacillus subtilis (strain 168) GN=yugS PE=3 SV=2	268	48985	22.06	KGEHHYVMDGK
315	1::sw|O05241|YUGS_BACSU	UPF0053 protein YugS OS=Bacillus subtilis (strain 168) GN=yugS PE=3 SV=2	268	48985	26	KGEHHYVMDGK
315	1::sw|O05241|YUGS_BACSU	UPF0053 protein YugS OS=Bacillus subtilis (strain 168) GN=yugS PE=3 SV=2	268	48985	23.56	KGEHHYVMDGK
315	1::sw|O05241|YUGS_BACSU	UPF0053 protein YugS OS=Bacillus subtilis (strain 168) GN=yugS PE=3 SV=2	268	48985	31.18	AGDVIHAEGCEFK
315	1::sw|O05241|YUGS_BACSU	UPF0053 protein YugS OS=Bacillus subtilis (strain 168) GN=yugS PE=3 SV=2	268	48985	43	AGDVIHAEGCEFK
315	1::sw|O05241|YUGS_BACSU	UPF0053 protein YugS OS=Bacillus subtilis (strain 168) GN=yugS PE=3 SV=2	268	48985	25.71	AGDVIHAEGCEFK
315	1::sw|O05241|YUGS_BACSU	UPF0053 protein YugS OS=Bacillus subtilis (strain 168) GN=yugS PE=3 SV=2	268	48985	40.86	EHQVVISEEELR
315	1::sw|O05241|YUGS_BACSU	UPF0053 protein YugS OS=Bacillus subtilis (strain 168) GN=yugS PE=3 SV=2	268	48985	18.66	EHQVVISEEELR
315	1::sw|O05241|YUGS_BACSU	UPF0053 protein YugS OS=Bacillus subtilis (strain 168) GN=yugS PE=3 SV=2	268	48985	24.12	DDKDHILGIINSK
315	1::sw|O05241|YUGS_BACSU	UPF0053 protein YugS OS=Bacillus subtilis (strain 168) GN=yugS PE=3 SV=2	268	48985	29.62	EHQVVISEEELR
315	1::sw|O05241|YUGS_BACSU	UPF0053 protein YugS OS=Bacillus subtilis (strain 168) GN=yugS PE=3 SV=2	268	48985	21.66	VIESIPVQQLLIR
315	1::sw|O05241|YUGS_BACSU	UPF0053 protein YugS OS=Bacillus subtilis (strain 168) GN=yugS PE=3 SV=2	268	48985	23.82	VIESIPVQQLLIR
315	1::sw|O05241|YUGS_BACSU	UPF0053 protein YugS OS=Bacillus subtilis (strain 168) GN=yugS PE=3 SV=2	268	48985	36.34	TEIAVISLEQSLEEAIHHIINER
328	1::sw|O05248|YUGP_BACSU	Putative membrane protease YugP OS=Bacillus subtilis (strain 168) GN=yugP PE=4 SV=1	247	24679	66.98	LSEPVYYGR
328	1::sw|O05248|YUGP_BACSU	Putative membrane protease YugP OS=Bacillus subtilis (strain 168) GN=yugP PE=4 SV=1	247	24679	47.95	LSEPVYYGR
328	1::sw|O05248|YUGP_BACSU	Putative membrane protease YugP OS=Bacillus subtilis (strain 168) GN=yugP PE=4 SV=1	247	24679	37.93	LSEPVYYGR
328	1::sw|O05248|YUGP_BACSU	Putative membrane protease YugP OS=Bacillus subtilis (strain 168) GN=yugP PE=4 SV=1	247	24679	51.14	LSEPVYYGR
328	1::sw|O05248|YUGP_BACSU	Putative membrane protease YugP OS=Bacillus subtilis (strain 168) GN=yugP PE=4 SV=1	247	24679	60.86	QIIVSEGFIR
328	1::sw|O05248|YUGP_BACSU	Putative membrane protease YugP OS=Bacillus subtilis (strain 168) GN=yugP PE=4 SV=1	247	24679	44.53	QIIVSEGFIR
328	1::sw|O05248|YUGP_BACSU	Putative membrane protease YugP OS=Bacillus subtilis (strain 168) GN=yugP PE=4 SV=1	247	24679	30.55	QIIVSEGFIR
328	1::sw|O05248|YUGP_BACSU	Putative membrane protease YugP OS=Bacillus subtilis (strain 168) GN=yugP PE=4 SV=1	247	24679	50.11	GTLTDHYDPTR
328	1::sw|O05248|YUGP_BACSU	Putative membrane protease YugP OS=Bacillus subtilis (strain 168) GN=yugP PE=4 SV=1	247	24679	37.64	GTLTDHYDPTR
328	1::sw|O05248|YUGP_BACSU	Putative membrane protease YugP OS=Bacillus subtilis (strain 168) GN=yugP PE=4 SV=1	247	24679	28.82	ILDINGLYDVPVEPVR
535	1::sw|O05250|MALK_BACSU	Sensor histidine kinase MalK OS=Bacillus subtilis (strain 168) GN=malK PE=3 SV=1	110	59064	37.51	AQSHEFMNK
535	1::sw|O05250|MALK_BACSU	Sensor histidine kinase MalK OS=Bacillus subtilis (strain 168) GN=malK PE=3 SV=1	110	59064	65.34	SSVLAGFLLGK
535	1::sw|O05250|MALK_BACSU	Sensor histidine kinase MalK OS=Bacillus subtilis (strain 168) GN=malK PE=3 SV=1	110	59064	19.29	GQTVGAIATFR
535	1::sw|O05250|MALK_BACSU	Sensor histidine kinase MalK OS=Bacillus subtilis (strain 168) GN=malK PE=3 SV=1	110	59064	51.27	GQTVGAIATFR
535	1::sw|O05250|MALK_BACSU	Sensor histidine kinase MalK OS=Bacillus subtilis (strain 168) GN=malK PE=3 SV=1	110	59064	21.38	EGILAVDEHGK
373	1::sw|O05251|MALR_BACSU	Transcriptional regulatory protein MalR OS=Bacillus subtilis (strain 168) GN=malR PE=3 SV=1	196	26948	42.16	FQTALSDYR
373	1::sw|O05251|MALR_BACSU	Transcriptional regulatory protein MalR OS=Bacillus subtilis (strain 168) GN=malR PE=3 SV=1	196	26948	64.14	NGLELLTELR
373	1::sw|O05251|MALR_BACSU	Transcriptional regulatory protein MalR OS=Bacillus subtilis (strain 168) GN=malR PE=3 SV=1	196	26948	77.34	NGLELLTELR
373	1::sw|O05251|MALR_BACSU	Transcriptional regulatory protein MalR OS=Bacillus subtilis (strain 168) GN=malR PE=3 SV=1	196	26948	22.92	HTEISQVSIR
373	1::sw|O05251|MALR_BACSU	Transcriptional regulatory protein MalR OS=Bacillus subtilis (strain 168) GN=malR PE=3 SV=1	196	26948	45.43	YLSQIDGFQLK
373	1::sw|O05251|MALR_BACSU	Transcriptional regulatory protein MalR OS=Bacillus subtilis (strain 168) GN=malR PE=3 SV=1	196	26948	53.09	YGAVDYLIKPFEFER
791	1::sw|O05252|YUFN_BACSU	Uncharacterized lipoprotein YufN OS=Bacillus subtilis (strain 168) GN=yufN PE=3 SV=2	52	38395	26.35	QNLSDDVIK
791	1::sw|O05252|YUFN_BACSU	Uncharacterized lipoprotein YufN OS=Bacillus subtilis (strain 168) GN=yufN PE=3 SV=2	52	38395	40.17	KVDTVVEDVTK
791	1::sw|O05252|YUFN_BACSU	Uncharacterized lipoprotein YufN OS=Bacillus subtilis (strain 168) GN=yufN PE=3 SV=2	52	38395	24.42	IGFVGGMESELIK
566	1::sw|O05253|YUFO_BACSU	Uncharacterized ABC transporter ATP-binding protein YufO OS=Bacillus subtilis (strain 168) GN=yufO PE=3 SV=1	100	56322	19.6	VHINSPNK
566	1::sw|O05253|YUFO_BACSU	Uncharacterized ABC transporter ATP-binding protein YufO OS=Bacillus subtilis (strain 168) GN=yufO PE=3 SV=1	100	56322	44.72	TPDEYTHAR
566	1::sw|O05253|YUFO_BACSU	Uncharacterized ABC transporter ATP-binding protein YufO OS=Bacillus subtilis (strain 168) GN=yufO PE=3 SV=1	100	56322	23.22	SLITEYDVR
566	1::sw|O05253|YUFO_BACSU	Uncharacterized ABC transporter ATP-binding protein YufO OS=Bacillus subtilis (strain 168) GN=yufO PE=3 SV=1	100	56322	46.98	AADISVGMQQR
566	1::sw|O05253|YUFO_BACSU	Uncharacterized ABC transporter ATP-binding protein YufO OS=Bacillus subtilis (strain 168) GN=yufO PE=3 SV=1	100	56322	18.5	AADISVGMQQR
566	1::sw|O05253|YUFO_BACSU	Uncharacterized ABC transporter ATP-binding protein YufO OS=Bacillus subtilis (strain 168) GN=yufO PE=3 SV=1	100	56322	47.38	AGQEVQDISDR
566	1::sw|O05253|YUFO_BACSU	Uncharacterized ABC transporter ATP-binding protein YufO OS=Bacillus subtilis (strain 168) GN=yufO PE=3 SV=1	100	56322	21.68	EIDRNPDLLIAAQPTR
566	1::sw|O05253|YUFO_BACSU	Uncharacterized ABC transporter ATP-binding protein YufO OS=Bacillus subtilis (strain 168) GN=yufO PE=3 SV=1	100	56322	23.88	GADILIFDEPTAVLTPHEIK
915	1::sw|O05255|YUFQ_BACSU	Uncharacterized ABC transporter permease protein YufQ OS=Bacillus subtilis (strain 168) GN=yufQ PE=3 SV=1	32	33716	32.42	IPGLGDIPVLGK
999	1::sw|O05265|YULF_BACSU	Uncharacterized oxidoreductase YulF OS=Bacillus subtilis (strain 168) GN=yulF PE=3 SV=2	25	36720	25.27	LESEENTFER
15	1::sw|O05267|YUMB_BACSU	NADH dehydrogenase-like protein YumB OS=Bacillus subtilis (strain 168) GN=yumB PE=3 SV=1	4134	45133	34.07	DVINQSR
15	1::sw|O05267|YUMB_BACSU	NADH dehydrogenase-like protein YumB OS=Bacillus subtilis (strain 168) GN=yumB PE=3 SV=1	4134	45133	35.5	DVINQSR
15	1::sw|O05267|YUMB_BACSU	NADH dehydrogenase-like protein YumB OS=Bacillus subtilis (strain 168) GN=yumB PE=3 SV=1	4134	45133	39.15	DVINQSR
15	1::sw|O05267|YUMB_BACSU	NADH dehydrogenase-like protein YumB OS=Bacillus subtilis (strain 168) GN=yumB PE=3 SV=1	4134	45133	41.41	DVINQSR
15	1::sw|O05267|YUMB_BACSU	NADH dehydrogenase-like protein YumB OS=Bacillus subtilis (strain 168) GN=yumB PE=3 SV=1	4134	45133	38.72	DVINQSR
15	1::sw|O05267|YUMB_BACSU	NADH dehydrogenase-like protein YumB OS=Bacillus subtilis (strain 168) GN=yumB PE=3 SV=1	4134	45133	29.53	DVINQSR
15	1::sw|O05267|YUMB_BACSU	NADH dehydrogenase-like protein YumB OS=Bacillus subtilis (strain 168) GN=yumB PE=3 SV=1	4134	45133	23.2	GTPASFMK
15	1::sw|O05267|YUMB_BACSU	NADH dehydrogenase-like protein YumB OS=Bacillus subtilis (strain 168) GN=yumB PE=3 SV=1	4134	45133	24.38	DEEPEQIK
15	1::sw|O05267|YUMB_BACSU	NADH dehydrogenase-like protein YumB OS=Bacillus subtilis (strain 168) GN=yumB PE=3 SV=1	4134	45133	27.74	DEEPEQIK
15	1::sw|O05267|YUMB_BACSU	NADH dehydrogenase-like protein YumB OS=Bacillus subtilis (strain 168) GN=yumB PE=3 SV=1	4134	45133	24.73	DEEPEQIK
15	1::sw|O05267|YUMB_BACSU	NADH dehydrogenase-like protein YumB OS=Bacillus subtilis (strain 168) GN=yumB PE=3 SV=1	4134	45133	34.3	DEEPEQIK
15	1::sw|O05267|YUMB_BACSU	NADH dehydrogenase-like protein YumB OS=Bacillus subtilis (strain 168) GN=yumB PE=3 SV=1	4134	45133	38.7	VNFVQDTVK
15	1::sw|O05267|YUMB_BACSU	NADH dehydrogenase-like protein YumB OS=Bacillus subtilis (strain 168) GN=yumB PE=3 SV=1	4134	45133	38.07	VNFVQDTVK
15	1::sw|O05267|YUMB_BACSU	NADH dehydrogenase-like protein YumB OS=Bacillus subtilis (strain 168) GN=yumB PE=3 SV=1	4134	45133	36.78	VNFVQDTVK
15	1::sw|O05267|YUMB_BACSU	NADH dehydrogenase-like protein YumB OS=Bacillus subtilis (strain 168) GN=yumB PE=3 SV=1	4134	45133	23.9	VNFVQDTVK
15	1::sw|O05267|YUMB_BACSU	NADH dehydrogenase-like protein YumB OS=Bacillus subtilis (strain 168) GN=yumB PE=3 SV=1	4134	45133	60.86	VNFVQDTVK
15	1::sw|O05267|YUMB_BACSU	NADH dehydrogenase-like protein YumB OS=Bacillus subtilis (strain 168) GN=yumB PE=3 SV=1	4134	45133	65.32	VNFVQDTVK
15	1::sw|O05267|YUMB_BACSU	NADH dehydrogenase-like protein YumB OS=Bacillus subtilis (strain 168) GN=yumB PE=3 SV=1	4134	45133	52.87	VNFVQDTVK
15	1::sw|O05267|YUMB_BACSU	NADH dehydrogenase-like protein YumB OS=Bacillus subtilis (strain 168) GN=yumB PE=3 SV=1	4134	45133	48.41	VNFVQDTVK
15	1::sw|O05267|YUMB_BACSU	NADH dehydrogenase-like protein YumB OS=Bacillus subtilis (strain 168) GN=yumB PE=3 SV=1	4134	45133	31.19	VNFVQDTVK
15	1::sw|O05267|YUMB_BACSU	NADH dehydrogenase-like protein YumB OS=Bacillus subtilis (strain 168) GN=yumB PE=3 SV=1	4134	45133	60.7	VNFVQDTVK
15	1::sw|O05267|YUMB_BACSU	NADH dehydrogenase-like protein YumB OS=Bacillus subtilis (strain 168) GN=yumB PE=3 SV=1	4134	45133	51.14	VNFVQDTVK
15	1::sw|O05267|YUMB_BACSU	NADH dehydrogenase-like protein YumB OS=Bacillus subtilis (strain 168) GN=yumB PE=3 SV=1	4134	45133	36.96	VNFVQDTVK
15	1::sw|O05267|YUMB_BACSU	NADH dehydrogenase-like protein YumB OS=Bacillus subtilis (strain 168) GN=yumB PE=3 SV=1	4134	45133	22.63	VNFVQDTVK
15	1::sw|O05267|YUMB_BACSU	NADH dehydrogenase-like protein YumB OS=Bacillus subtilis (strain 168) GN=yumB PE=3 SV=1	4134	45133	36.98	VNFVQDTVK
15	1::sw|O05267|YUMB_BACSU	NADH dehydrogenase-like protein YumB OS=Bacillus subtilis (strain 168) GN=yumB PE=3 SV=1	4134	45133	23.47	VNFVQDTVK
15	1::sw|O05267|YUMB_BACSU	NADH dehydrogenase-like protein YumB OS=Bacillus subtilis (strain 168) GN=yumB PE=3 SV=1	4134	45133	36.58	VNFVQDTVK
15	1::sw|O05267|YUMB_BACSU	NADH dehydrogenase-like protein YumB OS=Bacillus subtilis (strain 168) GN=yumB PE=3 SV=1	4134	45133	53.33	VNFVQDTVK
15	1::sw|O05267|YUMB_BACSU	NADH dehydrogenase-like protein YumB OS=Bacillus subtilis (strain 168) GN=yumB PE=3 SV=1	4134	45133	51.54	VNFVQDTVK
15	1::sw|O05267|YUMB_BACSU	NADH dehydrogenase-like protein YumB OS=Bacillus subtilis (strain 168) GN=yumB PE=3 SV=1	4134	45133	29.17	VNFVQDTVK
15	1::sw|O05267|YUMB_BACSU	NADH dehydrogenase-like protein YumB OS=Bacillus subtilis (strain 168) GN=yumB PE=3 SV=1	4134	45133	51.09	VNFVQDTVK
15	1::sw|O05267|YUMB_BACSU	NADH dehydrogenase-like protein YumB OS=Bacillus subtilis (strain 168) GN=yumB PE=3 SV=1	4134	45133	38.82	KDEEPEQIK
15	1::sw|O05267|YUMB_BACSU	NADH dehydrogenase-like protein YumB OS=Bacillus subtilis (strain 168) GN=yumB PE=3 SV=1	4134	45133	28.7	KDEEPEQIK
15	1::sw|O05267|YUMB_BACSU	NADH dehydrogenase-like protein YumB OS=Bacillus subtilis (strain 168) GN=yumB PE=3 SV=1	4134	45133	45	KDEEPEQIK
15	1::sw|O05267|YUMB_BACSU	NADH dehydrogenase-like protein YumB OS=Bacillus subtilis (strain 168) GN=yumB PE=3 SV=1	4134	45133	33.54	KDEEPEQIK
15	1::sw|O05267|YUMB_BACSU	NADH dehydrogenase-like protein YumB OS=Bacillus subtilis (strain 168) GN=yumB PE=3 SV=1	4134	45133	40.85	KDEEPEQIK
15	1::sw|O05267|YUMB_BACSU	NADH dehydrogenase-like protein YumB OS=Bacillus subtilis (strain 168) GN=yumB PE=3 SV=1	4134	45133	37.88	KDEEPEQIK
15	1::sw|O05267|YUMB_BACSU	NADH dehydrogenase-like protein YumB OS=Bacillus subtilis (strain 168) GN=yumB PE=3 SV=1	4134	45133	50.21	KDEEPEQIK
15	1::sw|O05267|YUMB_BACSU	NADH dehydrogenase-like protein YumB OS=Bacillus subtilis (strain 168) GN=yumB PE=3 SV=1	4134	45133	27.75	KDEEPEQIK
15	1::sw|O05267|YUMB_BACSU	NADH dehydrogenase-like protein YumB OS=Bacillus subtilis (strain 168) GN=yumB PE=3 SV=1	4134	45133	47.1	KDEEPEQIK
15	1::sw|O05267|YUMB_BACSU	NADH dehydrogenase-like protein YumB OS=Bacillus subtilis (strain 168) GN=yumB PE=3 SV=1	4134	45133	41.68	KDEEPEQIK
15	1::sw|O05267|YUMB_BACSU	NADH dehydrogenase-like protein YumB OS=Bacillus subtilis (strain 168) GN=yumB PE=3 SV=1	4134	45133	38.29	KDEEPEQIK
15	1::sw|O05267|YUMB_BACSU	NADH dehydrogenase-like protein YumB OS=Bacillus subtilis (strain 168) GN=yumB PE=3 SV=1	4134	45133	42.73	KDEEPEQIK
15	1::sw|O05267|YUMB_BACSU	NADH dehydrogenase-like protein YumB OS=Bacillus subtilis (strain 168) GN=yumB PE=3 SV=1	4134	45133	33.42	KDEEPEQIK
15	1::sw|O05267|YUMB_BACSU	NADH dehydrogenase-like protein YumB OS=Bacillus subtilis (strain 168) GN=yumB PE=3 SV=1	4134	45133	19.7	KDEEPEQIK
15	1::sw|O05267|YUMB_BACSU	NADH dehydrogenase-like protein YumB OS=Bacillus subtilis (strain 168) GN=yumB PE=3 SV=1	4134	45133	36.22	KDEEPEQIK
15	1::sw|O05267|YUMB_BACSU	NADH dehydrogenase-like protein YumB OS=Bacillus subtilis (strain 168) GN=yumB PE=3 SV=1	4134	45133	48.53	KDEEPEQIK
15	1::sw|O05267|YUMB_BACSU	NADH dehydrogenase-like protein YumB OS=Bacillus subtilis (strain 168) GN=yumB PE=3 SV=1	4134	45133	26.01	SQTVVWAAGVR
15	1::sw|O05267|YUMB_BACSU	NADH dehydrogenase-like protein YumB OS=Bacillus subtilis (strain 168) GN=yumB PE=3 SV=1	4134	45133	45.64	SQTVVWAAGVR
15	1::sw|O05267|YUMB_BACSU	NADH dehydrogenase-like protein YumB OS=Bacillus subtilis (strain 168) GN=yumB PE=3 SV=1	4134	45133	20.45	SQTVVWAAGVR
15	1::sw|O05267|YUMB_BACSU	NADH dehydrogenase-like protein YumB OS=Bacillus subtilis (strain 168) GN=yumB PE=3 SV=1	4134	45133	47.66	SQTVVWAAGVR
15	1::sw|O05267|YUMB_BACSU	NADH dehydrogenase-like protein YumB OS=Bacillus subtilis (strain 168) GN=yumB PE=3 SV=1	4134	45133	81.78	SQTVVWAAGVR
15	1::sw|O05267|YUMB_BACSU	NADH dehydrogenase-like protein YumB OS=Bacillus subtilis (strain 168) GN=yumB PE=3 SV=1	4134	45133	70.47	SQTVVWAAGVR
15	1::sw|O05267|YUMB_BACSU	NADH dehydrogenase-like protein YumB OS=Bacillus subtilis (strain 168) GN=yumB PE=3 SV=1	4134	45133	21.65	SQTVVWAAGVR
15	1::sw|O05267|YUMB_BACSU	NADH dehydrogenase-like protein YumB OS=Bacillus subtilis (strain 168) GN=yumB PE=3 SV=1	4134	45133	27.73	SQTVVWAAGVR
15	1::sw|O05267|YUMB_BACSU	NADH dehydrogenase-like protein YumB OS=Bacillus subtilis (strain 168) GN=yumB PE=3 SV=1	4134	45133	82.11	SQTVVWAAGVR
15	1::sw|O05267|YUMB_BACSU	NADH dehydrogenase-like protein YumB OS=Bacillus subtilis (strain 168) GN=yumB PE=3 SV=1	4134	45133	91.64	SQTVVWAAGVR
15	1::sw|O05267|YUMB_BACSU	NADH dehydrogenase-like protein YumB OS=Bacillus subtilis (strain 168) GN=yumB PE=3 SV=1	4134	45133	27.24	SQTVVWAAGVR
15	1::sw|O05267|YUMB_BACSU	NADH dehydrogenase-like protein YumB OS=Bacillus subtilis (strain 168) GN=yumB PE=3 SV=1	4134	45133	63.8	SLFMIGGLGLTLK
15	1::sw|O05267|YUMB_BACSU	NADH dehydrogenase-like protein YumB OS=Bacillus subtilis (strain 168) GN=yumB PE=3 SV=1	4134	45133	94.92	SLFMIGGLGLTLK
15	1::sw|O05267|YUMB_BACSU	NADH dehydrogenase-like protein YumB OS=Bacillus subtilis (strain 168) GN=yumB PE=3 SV=1	4134	45133	53.11	SLFMIGGLGLTLK
15	1::sw|O05267|YUMB_BACSU	NADH dehydrogenase-like protein YumB OS=Bacillus subtilis (strain 168) GN=yumB PE=3 SV=1	4134	45133	83.69	SLFMIGGLGLTLK
15	1::sw|O05267|YUMB_BACSU	NADH dehydrogenase-like protein YumB OS=Bacillus subtilis (strain 168) GN=yumB PE=3 SV=1	4134	45133	31.55	SLFMIGGLGLTLK
15	1::sw|O05267|YUMB_BACSU	NADH dehydrogenase-like protein YumB OS=Bacillus subtilis (strain 168) GN=yumB PE=3 SV=1	4134	45133	86.62	SLFMIGGLGLTLK
15	1::sw|O05267|YUMB_BACSU	NADH dehydrogenase-like protein YumB OS=Bacillus subtilis (strain 168) GN=yumB PE=3 SV=1	4134	45133	33.37	SLFMIGGLGLTLK
15	1::sw|O05267|YUMB_BACSU	NADH dehydrogenase-like protein YumB OS=Bacillus subtilis (strain 168) GN=yumB PE=3 SV=1	4134	45133	82.76	SLFMIGGLGLTLK
15	1::sw|O05267|YUMB_BACSU	NADH dehydrogenase-like protein YumB OS=Bacillus subtilis (strain 168) GN=yumB PE=3 SV=1	4134	45133	49.85	GGELEEFKPDIK
15	1::sw|O05267|YUMB_BACSU	NADH dehydrogenase-like protein YumB OS=Bacillus subtilis (strain 168) GN=yumB PE=3 SV=1	4134	45133	46.72	GGELEEFKPDIK
15	1::sw|O05267|YUMB_BACSU	NADH dehydrogenase-like protein YumB OS=Bacillus subtilis (strain 168) GN=yumB PE=3 SV=1	4134	45133	54.23	GGELEEFKPDIK
15	1::sw|O05267|YUMB_BACSU	NADH dehydrogenase-like protein YumB OS=Bacillus subtilis (strain 168) GN=yumB PE=3 SV=1	4134	45133	25.9	GGELEEFKPDIK
15	1::sw|O05267|YUMB_BACSU	NADH dehydrogenase-like protein YumB OS=Bacillus subtilis (strain 168) GN=yumB PE=3 SV=1	4134	45133	27.87	GGELEEFKPDIK
15	1::sw|O05267|YUMB_BACSU	NADH dehydrogenase-like protein YumB OS=Bacillus subtilis (strain 168) GN=yumB PE=3 SV=1	4134	45133	35.77	GGELEEFKPDIK
15	1::sw|O05267|YUMB_BACSU	NADH dehydrogenase-like protein YumB OS=Bacillus subtilis (strain 168) GN=yumB PE=3 SV=1	4134	45133	63.27	GGELEEFKPDIK
15	1::sw|O05267|YUMB_BACSU	NADH dehydrogenase-like protein YumB OS=Bacillus subtilis (strain 168) GN=yumB PE=3 SV=1	4134	45133	44.65	GGELEEFKPDIK
15	1::sw|O05267|YUMB_BACSU	NADH dehydrogenase-like protein YumB OS=Bacillus subtilis (strain 168) GN=yumB PE=3 SV=1	4134	45133	34.37	GGELEEFKPDIK
15	1::sw|O05267|YUMB_BACSU	NADH dehydrogenase-like protein YumB OS=Bacillus subtilis (strain 168) GN=yumB PE=3 SV=1	4134	45133	38.59	GGELEEFKPDIK
15	1::sw|O05267|YUMB_BACSU	NADH dehydrogenase-like protein YumB OS=Bacillus subtilis (strain 168) GN=yumB PE=3 SV=1	4134	45133	32.02	GGELEEFKPDIK
15	1::sw|O05267|YUMB_BACSU	NADH dehydrogenase-like protein YumB OS=Bacillus subtilis (strain 168) GN=yumB PE=3 SV=1	4134	45133	27.57	GGELEEFKPDIK
15	1::sw|O05267|YUMB_BACSU	NADH dehydrogenase-like protein YumB OS=Bacillus subtilis (strain 168) GN=yumB PE=3 SV=1	4134	45133	28.76	GGELEEFKPDIK
15	1::sw|O05267|YUMB_BACSU	NADH dehydrogenase-like protein YumB OS=Bacillus subtilis (strain 168) GN=yumB PE=3 SV=1	4134	45133	28.11	GGELEEFKPDIK
15	1::sw|O05267|YUMB_BACSU	NADH dehydrogenase-like protein YumB OS=Bacillus subtilis (strain 168) GN=yumB PE=3 SV=1	4134	45133	25.51	SLFMIGGLGLTLK
15	1::sw|O05267|YUMB_BACSU	NADH dehydrogenase-like protein YumB OS=Bacillus subtilis (strain 168) GN=yumB PE=3 SV=1	4134	45133	79.79	SLFMIGGLGLTLK
15	1::sw|O05267|YUMB_BACSU	NADH dehydrogenase-like protein YumB OS=Bacillus subtilis (strain 168) GN=yumB PE=3 SV=1	4134	45133	49.53	SLFMIGGLGLTLKK
15	1::sw|O05267|YUMB_BACSU	NADH dehydrogenase-like protein YumB OS=Bacillus subtilis (strain 168) GN=yumB PE=3 SV=1	4134	45133	46.9	EYAFPIANINTSR
15	1::sw|O05267|YUMB_BACSU	NADH dehydrogenase-like protein YumB OS=Bacillus subtilis (strain 168) GN=yumB PE=3 SV=1	4134	45133	67.05	EYAFPIANINTSR
15	1::sw|O05267|YUMB_BACSU	NADH dehydrogenase-like protein YumB OS=Bacillus subtilis (strain 168) GN=yumB PE=3 SV=1	4134	45133	68.77	EYAFPIANINTSR
15	1::sw|O05267|YUMB_BACSU	NADH dehydrogenase-like protein YumB OS=Bacillus subtilis (strain 168) GN=yumB PE=3 SV=1	4134	45133	54.38	EYAFPIANINTSR
15	1::sw|O05267|YUMB_BACSU	NADH dehydrogenase-like protein YumB OS=Bacillus subtilis (strain 168) GN=yumB PE=3 SV=1	4134	45133	52.79	EYAFPIANINTSR
15	1::sw|O05267|YUMB_BACSU	NADH dehydrogenase-like protein YumB OS=Bacillus subtilis (strain 168) GN=yumB PE=3 SV=1	4134	45133	58.19	EYAFPIANINTSR
15	1::sw|O05267|YUMB_BACSU	NADH dehydrogenase-like protein YumB OS=Bacillus subtilis (strain 168) GN=yumB PE=3 SV=1	4134	45133	63.05	EYAFPIANINTSR
15	1::sw|O05267|YUMB_BACSU	NADH dehydrogenase-like protein YumB OS=Bacillus subtilis (strain 168) GN=yumB PE=3 SV=1	4134	45133	56.66	IGTAVQECTPEGVR
15	1::sw|O05267|YUMB_BACSU	NADH dehydrogenase-like protein YumB OS=Bacillus subtilis (strain 168) GN=yumB PE=3 SV=1	4134	45133	73.2	IGTAVQECTPEGVR
15	1::sw|O05267|YUMB_BACSU	NADH dehydrogenase-like protein YumB OS=Bacillus subtilis (strain 168) GN=yumB PE=3 SV=1	4134	45133	56.57	IGTAVQECTPEGVR
15	1::sw|O05267|YUMB_BACSU	NADH dehydrogenase-like protein YumB OS=Bacillus subtilis (strain 168) GN=yumB PE=3 SV=1	4134	45133	56.63	IGTAVQECTPEGVR
15	1::sw|O05267|YUMB_BACSU	NADH dehydrogenase-like protein YumB OS=Bacillus subtilis (strain 168) GN=yumB PE=3 SV=1	4134	45133	73.35	IGTAVQECTPEGVR
15	1::sw|O05267|YUMB_BACSU	NADH dehydrogenase-like protein YumB OS=Bacillus subtilis (strain 168) GN=yumB PE=3 SV=1	4134	45133	69.11	IGTAVQECTPEGVR
15	1::sw|O05267|YUMB_BACSU	NADH dehydrogenase-like protein YumB OS=Bacillus subtilis (strain 168) GN=yumB PE=3 SV=1	4134	45133	73.49	IGTAVQECTPEGVR
15	1::sw|O05267|YUMB_BACSU	NADH dehydrogenase-like protein YumB OS=Bacillus subtilis (strain 168) GN=yumB PE=3 SV=1	4134	45133	72.71	IGTAVQECTPEGVR
15	1::sw|O05267|YUMB_BACSU	NADH dehydrogenase-like protein YumB OS=Bacillus subtilis (strain 168) GN=yumB PE=3 SV=1	4134	45133	73.54	IGTAVQECTPEGVR
15	1::sw|O05267|YUMB_BACSU	NADH dehydrogenase-like protein YumB OS=Bacillus subtilis (strain 168) GN=yumB PE=3 SV=1	4134	45133	72.84	IGTAVQECTPEGVR
15	1::sw|O05267|YUMB_BACSU	NADH dehydrogenase-like protein YumB OS=Bacillus subtilis (strain 168) GN=yumB PE=3 SV=1	4134	45133	73.24	IGTAVQECTPEGVR
15	1::sw|O05267|YUMB_BACSU	NADH dehydrogenase-like protein YumB OS=Bacillus subtilis (strain 168) GN=yumB PE=3 SV=1	4134	45133	46.6	IGTAVQECTPEGVR
15	1::sw|O05267|YUMB_BACSU	NADH dehydrogenase-like protein YumB OS=Bacillus subtilis (strain 168) GN=yumB PE=3 SV=1	4134	45133	79.46	YVGPNDADITLVNK
15	1::sw|O05267|YUMB_BACSU	NADH dehydrogenase-like protein YumB OS=Bacillus subtilis (strain 168) GN=yumB PE=3 SV=1	4134	45133	100.89	YVGPNDADITLVNK
15	1::sw|O05267|YUMB_BACSU	NADH dehydrogenase-like protein YumB OS=Bacillus subtilis (strain 168) GN=yumB PE=3 SV=1	4134	45133	47.82	YVGPNDADITLVNK
15	1::sw|O05267|YUMB_BACSU	NADH dehydrogenase-like protein YumB OS=Bacillus subtilis (strain 168) GN=yumB PE=3 SV=1	4134	45133	108.4	YVGPNDADITLVNK
15	1::sw|O05267|YUMB_BACSU	NADH dehydrogenase-like protein YumB OS=Bacillus subtilis (strain 168) GN=yumB PE=3 SV=1	4134	45133	88.18	YVGPNDADITLVNK
15	1::sw|O05267|YUMB_BACSU	NADH dehydrogenase-like protein YumB OS=Bacillus subtilis (strain 168) GN=yumB PE=3 SV=1	4134	45133	90.9	YVGPNDADITLVNK
15	1::sw|O05267|YUMB_BACSU	NADH dehydrogenase-like protein YumB OS=Bacillus subtilis (strain 168) GN=yumB PE=3 SV=1	4134	45133	96.89	GHPIVEEAGFENMR
15	1::sw|O05267|YUMB_BACSU	NADH dehydrogenase-like protein YumB OS=Bacillus subtilis (strain 168) GN=yumB PE=3 SV=1	4134	45133	76.32	GHPIVEEAGFENMR
15	1::sw|O05267|YUMB_BACSU	NADH dehydrogenase-like protein YumB OS=Bacillus subtilis (strain 168) GN=yumB PE=3 SV=1	4134	45133	92.84	GHPIVEEAGFENMR
15	1::sw|O05267|YUMB_BACSU	NADH dehydrogenase-like protein YumB OS=Bacillus subtilis (strain 168) GN=yumB PE=3 SV=1	4134	45133	67.31	GHPIVEEAGFENMR
15	1::sw|O05267|YUMB_BACSU	NADH dehydrogenase-like protein YumB OS=Bacillus subtilis (strain 168) GN=yumB PE=3 SV=1	4134	45133	45.96	GHPIVEEAGFENMR
15	1::sw|O05267|YUMB_BACSU	NADH dehydrogenase-like protein YumB OS=Bacillus subtilis (strain 168) GN=yumB PE=3 SV=1	4134	45133	30.86	GHPIVEEAGFENMR
15	1::sw|O05267|YUMB_BACSU	NADH dehydrogenase-like protein YumB OS=Bacillus subtilis (strain 168) GN=yumB PE=3 SV=1	4134	45133	52.02	GHPIVEEAGFENMR
15	1::sw|O05267|YUMB_BACSU	NADH dehydrogenase-like protein YumB OS=Bacillus subtilis (strain 168) GN=yumB PE=3 SV=1	4134	45133	28.76	GHPIVEEAGFENMR
15	1::sw|O05267|YUMB_BACSU	NADH dehydrogenase-like protein YumB OS=Bacillus subtilis (strain 168) GN=yumB PE=3 SV=1	4134	45133	30.83	GHPIVEEAGFENMR
15	1::sw|O05267|YUMB_BACSU	NADH dehydrogenase-like protein YumB OS=Bacillus subtilis (strain 168) GN=yumB PE=3 SV=1	4134	45133	37	GHPIVEEAGFENMR
15	1::sw|O05267|YUMB_BACSU	NADH dehydrogenase-like protein YumB OS=Bacillus subtilis (strain 168) GN=yumB PE=3 SV=1	4134	45133	36.91	GHPIVEEAGFENMR
15	1::sw|O05267|YUMB_BACSU	NADH dehydrogenase-like protein YumB OS=Bacillus subtilis (strain 168) GN=yumB PE=3 SV=1	4134	45133	46.81	GHPIVEEAGFENMR
15	1::sw|O05267|YUMB_BACSU	NADH dehydrogenase-like protein YumB OS=Bacillus subtilis (strain 168) GN=yumB PE=3 SV=1	4134	45133	98.81	IVILGAGYGGLMTVTR
15	1::sw|O05267|YUMB_BACSU	NADH dehydrogenase-like protein YumB OS=Bacillus subtilis (strain 168) GN=yumB PE=3 SV=1	4134	45133	81.12	IVILGAGYGGLMTVTR
15	1::sw|O05267|YUMB_BACSU	NADH dehydrogenase-like protein YumB OS=Bacillus subtilis (strain 168) GN=yumB PE=3 SV=1	4134	45133	23.8	IVILGAGYGGLMTVTR
15	1::sw|O05267|YUMB_BACSU	NADH dehydrogenase-like protein YumB OS=Bacillus subtilis (strain 168) GN=yumB PE=3 SV=1	4134	45133	90.55	IVILGAGYGGLMTVTR
15	1::sw|O05267|YUMB_BACSU	NADH dehydrogenase-like protein YumB OS=Bacillus subtilis (strain 168) GN=yumB PE=3 SV=1	4134	45133	20.13	IVILGAGYGGLMTVTR
15	1::sw|O05267|YUMB_BACSU	NADH dehydrogenase-like protein YumB OS=Bacillus subtilis (strain 168) GN=yumB PE=3 SV=1	4134	45133	104.1	IVILGAGYGGLMTVTR
15	1::sw|O05267|YUMB_BACSU	NADH dehydrogenase-like protein YumB OS=Bacillus subtilis (strain 168) GN=yumB PE=3 SV=1	4134	45133	49.9	IVILGAGYGGLMTVTR
15	1::sw|O05267|YUMB_BACSU	NADH dehydrogenase-like protein YumB OS=Bacillus subtilis (strain 168) GN=yumB PE=3 SV=1	4134	45133	66.67	IVILGAGYGGLMTVTR
15	1::sw|O05267|YUMB_BACSU	NADH dehydrogenase-like protein YumB OS=Bacillus subtilis (strain 168) GN=yumB PE=3 SV=1	4134	45133	82.28	IVILGAGYGGLMTVTR
15	1::sw|O05267|YUMB_BACSU	NADH dehydrogenase-like protein YumB OS=Bacillus subtilis (strain 168) GN=yumB PE=3 SV=1	4134	45133	38.48	IVILGAGYGGLMTVTR
15	1::sw|O05267|YUMB_BACSU	NADH dehydrogenase-like protein YumB OS=Bacillus subtilis (strain 168) GN=yumB PE=3 SV=1	4134	45133	103.49	IVILGAGYGGLMTVTR
15	1::sw|O05267|YUMB_BACSU	NADH dehydrogenase-like protein YumB OS=Bacillus subtilis (strain 168) GN=yumB PE=3 SV=1	4134	45133	80.54	IVILGAGYGGLMTVTR
15	1::sw|O05267|YUMB_BACSU	NADH dehydrogenase-like protein YumB OS=Bacillus subtilis (strain 168) GN=yumB PE=3 SV=1	4134	45133	49.62	IVILGAGYGGLMTVTR
15	1::sw|O05267|YUMB_BACSU	NADH dehydrogenase-like protein YumB OS=Bacillus subtilis (strain 168) GN=yumB PE=3 SV=1	4134	45133	29.35	IVILGAGYGGLMTVTR
15	1::sw|O05267|YUMB_BACSU	NADH dehydrogenase-like protein YumB OS=Bacillus subtilis (strain 168) GN=yumB PE=3 SV=1	4134	45133	47.21	IVILGAGYGGLMTVTR
15	1::sw|O05267|YUMB_BACSU	NADH dehydrogenase-like protein YumB OS=Bacillus subtilis (strain 168) GN=yumB PE=3 SV=1	4134	45133	24.34	IVILGAGYGGLMTVTR
15	1::sw|O05267|YUMB_BACSU	NADH dehydrogenase-like protein YumB OS=Bacillus subtilis (strain 168) GN=yumB PE=3 SV=1	4134	45133	94.99	GTVASLGEHNAVGVVYGR
15	1::sw|O05267|YUMB_BACSU	NADH dehydrogenase-like protein YumB OS=Bacillus subtilis (strain 168) GN=yumB PE=3 SV=1	4134	45133	25.84	GTVASLGEHNAVGVVYGR
15	1::sw|O05267|YUMB_BACSU	NADH dehydrogenase-like protein YumB OS=Bacillus subtilis (strain 168) GN=yumB PE=3 SV=1	4134	45133	39.07	EHIELQFATYNTEAEK
15	1::sw|O05267|YUMB_BACSU	NADH dehydrogenase-like protein YumB OS=Bacillus subtilis (strain 168) GN=yumB PE=3 SV=1	4134	45133	39.47	EHIELQFATYNTEAEK
15	1::sw|O05267|YUMB_BACSU	NADH dehydrogenase-like protein YumB OS=Bacillus subtilis (strain 168) GN=yumB PE=3 SV=1	4134	45133	32.69	HNYHYETTWMHEASAGTLHHDR
387	1::sw|O05268|FENR2_BACSU	Ferredoxin--NADP reductase 2 OS=Bacillus subtilis (strain 168) GN=yumC PE=1 SV=2	185	36932	25.84	EVSIIHR
387	1::sw|O05268|FENR2_BACSU	Ferredoxin--NADP reductase 2 OS=Bacillus subtilis (strain 168) GN=yumC PE=1 SV=2	185	36932	19.38	NWGLDIEK
387	1::sw|O05268|FENR2_BACSU	Ferredoxin--NADP reductase 2 OS=Bacillus subtilis (strain 168) GN=yumC PE=1 SV=2	185	36932	46.17	AQELINNLK
387	1::sw|O05268|FENR2_BACSU	Ferredoxin--NADP reductase 2 OS=Bacillus subtilis (strain 168) GN=yumC PE=1 SV=2	185	36932	33.92	YIYDVAGFPK
387	1::sw|O05268|FENR2_BACSU	Ferredoxin--NADP reductase 2 OS=Bacillus subtilis (strain 168) GN=yumC PE=1 SV=2	185	36932	45.5	YIYDVAGFPK
387	1::sw|O05268|FENR2_BACSU	Ferredoxin--NADP reductase 2 OS=Bacillus subtilis (strain 168) GN=yumC PE=1 SV=2	185	36932	47.57	TVIITAGNGAFKPR
387	1::sw|O05268|FENR2_BACSU	Ferredoxin--NADP reductase 2 OS=Bacillus subtilis (strain 168) GN=yumC PE=1 SV=2	185	36932	40.29	VQPLHSTSLFENK
387	1::sw|O05268|FENR2_BACSU	Ferredoxin--NADP reductase 2 OS=Bacillus subtilis (strain 168) GN=yumC PE=1 SV=2	185	36932	30.3	KLELENAEQYEGK
387	1::sw|O05268|FENR2_BACSU	Ferredoxin--NADP reductase 2 OS=Bacillus subtilis (strain 168) GN=yumC PE=1 SV=2	185	36932	19.7	KLELENAEQYEGK
387	1::sw|O05268|FENR2_BACSU	Ferredoxin--NADP reductase 2 OS=Bacillus subtilis (strain 168) GN=yumC PE=1 SV=2	185	36932	53.58	VNLIASGFGEAPTAVNNAK
754	1::sw|O05405|YRHO_BACSU	Uncharacterized protein YrhO OS=Bacillus subtilis (strain 168) GN=yrhO PE=4 SV=1	57	31769	18.58	MKENMLDILK
754	1::sw|O05405|YRHO_BACSU	Uncharacterized protein YrhO OS=Bacillus subtilis (strain 168) GN=yrhO PE=4 SV=1	57	31769	21.32	MKENMLDILK
754	1::sw|O05405|YRHO_BACSU	Uncharacterized protein YrhO OS=Bacillus subtilis (strain 168) GN=yrhO PE=4 SV=1	57	31769	57.39	IYEVLESLVIR
922	1::sw|O05496|YDHE_BACSU	Uncharacterized UDP-glucosyltransferase YdhE OS=Bacillus subtilis (strain 168) GN=ydhE PE=3 SV=2	32	44745	31.57	GELNVVYTSR
1048	1::sw|O05509|GMUR_BACSU	HTH-type transcriptional regulator GmuR OS=Bacillus subtilis (strain 168) GN=gmuR PE=1 SV=1	19	27471	18.7	IVEGEPYVLEK
853	1::sw|O05514|THIL_BACSU	Thiamine-monophosphate kinase OS=Bacillus subtilis (strain 168) GN=thiL PE=3 SV=2	40	36146	26.47	WTESEIK
853	1::sw|O05514|THIL_BACSU	Thiamine-monophosphate kinase OS=Bacillus subtilis (strain 168) GN=thiL PE=3 SV=2	40	36146	35.22	TDQTSMILEK
853	1::sw|O05514|THIL_BACSU	Thiamine-monophosphate kinase OS=Bacillus subtilis (strain 168) GN=thiL PE=3 SV=2	40	36146	22.75	FYLVSLAVPSK
621	1::sw|O05516|TSAB_BACSU	tRNA threonylcarbamoyladenosine biosynthesis protein TsaB OS=Bacillus subtilis (strain 168) GN=tsaB PE=1 SV=1	83	25284	53.12	GFIGTAAQHNPR
621	1::sw|O05516|TSAB_BACSU	tRNA threonylcarbamoyladenosine biosynthesis protein TsaB OS=Bacillus subtilis (strain 168) GN=tsaB PE=1 SV=1	83	25284	48.52	GFIGTAAQHNPR
892	1::sw|O05518|TSAD_BACSU	tRNA N6-adenosine threonylcarbamoyltransferase OS=Bacillus subtilis (strain 168) GN=tsaD PE=1 SV=1	35	36933	24.1	SAVINTLHNASQK
892	1::sw|O05518|TSAD_BACSU	tRNA N6-adenosine threonylcarbamoyltransferase OS=Bacillus subtilis (strain 168) GN=tsaD PE=1 SV=1	35	36933	27.78	TMGLPYPGGPQIDK
[truncated: 17,080 more rows]

## Sheet: S1d
Table S1: Proteins identified in the Bacillus subtilis spore inner membrane fraction
[truncated: 15,793 more rows]
